# Supplementary material for: Cryo-EM structure of Chlamydomonas Photosystem I complexed with the alternative electron donor cytochrome c6
Source: Research Square preprint supplement (doi:10.21203/rs.3.rs-7585678/v1), 2025-11-07
Supplement: Supplementary file 1 [file 7a20e2e33654da86395f45ac.xlsx]

## Sheet: raw
	322	322	-350		6	record_id	15252	record_id	15253	record_id	15254	record_id	15255	record_id	15256	record_id	15257	record_id	15258	record_id	15259	record_id	15260	record_id	15261	record_id	15264	record_id	15265	record_id	15266	record_id	15267	record_id	15268	record_id	15269	record_id	15270	record_id	15271	record_id	15272	record_id	15273	record_id	15274	record_id	15275
sequence	10msT 4( 20(50msD) A[on]10usA[off]140usB[on]10usB[off] {700us,100,5s,D}10s)					Data nr	10msT 4( 20(50msD) A[on]10usA[off]140usB[on]10usB[off] {700us,100,5s,D}10s)	sequence	10msT 4( 20(50msD) A[on]10usA[off]140usB[on]10usB[off] {700us,100,5s,D}10s)	sequence	10msT 4( 20(50msD) A[on]10usA[off]140usB[on]10usB[off] {700us,100,5s,D}10s)	sequence	10msT 4( 20(50msD) A[on]10usA[off]140usB[on]10usB[off] {700us,100,5s,D}10s)	sequence	10msT 4( 20(50msD) A[on]10usA[off]140usB[on]10usB[off] {700us,100,5s,D}10s)	sequence	10msT 4( 20(50msD) A[on]10usA[off]140usB[on]10usB[off] {700us,100,5s,D}10s)	sequence	10msT 4( 20(50msD) A[on]10usA[off]140usB[on]10usB[off] {700us,100,5s,D}10s)	sequence	10msT 4( 20(50msD) A[on]10usA[off]140usB[on]10usB[off] {700us,100,5s,D}10s)	sequence	10msT 4( 20(50msD) A[on]10usA[off]140usB[on]10usB[off] {700us,100,5s,D}10s)	sequence	10msT 4( 20(50msD) A[on]10usA[off]140usB[on]10usB[off] {700us,100,5s,D}10s)	sequence	10msT 4( 20(50msD) A[on]10usA[off]140usB[on]10usB[off] {700us,100,5s,D}10s)	sequence	10msT 4( 20(50msD) A[on]10usA[off]140usB[on]10usB[off] {700us,100,5s,D}10s)	sequence	10msT 4( 20(50msD) A[on]10usA[off]140usB[on]10usB[off] {700us,100,5s,D}10s)	sequence	10msT 4( 20(50msD) A[on]10usA[off]140usB[on]10usB[off] {700us,100,5s,D}10s)	sequence	10msT 4( 20(50msD) A[on]10usA[off]140usB[on]10usB[off] {700us,100,5s,D}10s)	sequence	10msT 4( 20(50msD) A[on]10usA[off]140usB[on]10usB[off] {700us,100,5s,D}10s)	sequence	10msT 4( 20(50msD) A[on]10usA[off]140usB[on]10usB[off] {700us,100,5s,D}10s)	sequence	10msT 4( 20(50msD) A[on]10usA[off]140usB[on]10usB[off] {700us,100,5s,D}10s)	sequence	10msT 4( 20(50msD) A[on]10usA[off]140usB[on]10usB[off] {700us,100,5s,D}10s)	sequence	10msT 4( 20(50msD) A[on]10usA[off]140usB[on]10usB[off] {700us,100,5s,D}10s)	sequence	10msT 4( 20(50msD) A[on]10usA[off]140usB[on]10usB[off] {700us,100,5s,D}10s)	sequence	10msT 4( 20(50msD) A[on]10usA[off]140usB[on]10usB[off] {700us,100,5s,D}10s)
						comment	705nm Lz_Ppo: dad()0.5mM+mgcl()2.5mM+asc()10mM+kcl()3.0mM+PSI(psaBxH20_sWT_d241111)250nM+C6(GCr_E69Q)0.0uM+mv()1mM-352	comment	740nm Lz_Ppo: dad()0.5mM+mgcl()2.5mM+asc()10mM+kcl()3.0mM+PSI(psaBxH20_sWT_d241111)250nM+C6(GCr_E69Q)0.0uM+mv()1mM-352	comment	705nm Lz_Ppo: dad()0.5mM+mgcl()2.5mM+asc()10mM+kcl()3.0mM+PSI(psaBxH20_sWT_d241111)250nM+C6(GCr_E69Q)0.5uM+mv()1mM-352	comment	740nm Lz_Ppo: dad()0.5mM+mgcl()2.5mM+asc()10mM+kcl()3.0mM+PSI(psaBxH20_sWT_d241111)250nM+C6(GCr_E69Q)0.5uM+mv()1mM-352	comment	705nm Lz_Ppo: dad()0.5mM+mgcl()2.5mM+asc()10mM+kcl()3.0mM+PSI(psaBxH20_sWT_d241111)250nM+C6(GCr_E69Q)1.0uM+mv()1mM-352	comment	740nm Lz_Ppo: dad()0.5mM+mgcl()2.5mM+asc()10mM+kcl()3.0mM+PSI(psaBxH20_sWT_d241111)250nM+C6(GCr_E69Q)1.0uM+mv()1mM-352	comment	705nm Lz_Ppo: dad()0.5mM+mgcl()2.5mM+asc()10mM+kcl()3.0mM+PSI(psaBxH20_sWT_d241111)250nM+C6(GCr_E69Q)1.5uM+mv()1mM-352	comment	740nm Lz_Ppo: dad()0.5mM+mgcl()2.5mM+asc()10mM+kcl()3.0mM+PSI(psaBxH20_sWT_d241111)250nM+C6(GCr_E69Q)1.5uM+mv()1mM-352	comment	705nm Lz_Ppo: dad()0.5mM+mgcl()2.5mM+asc()10mM+kcl()3.0mM+PSI(psaBxH20_sWT_d241111)250nM+C6(GCr_E69Q)2.0uM+mv()1mM-352	comment	740nm Lz_Ppo: dad()0.5mM+mgcl()2.5mM+asc()10mM+kcl()3.0mM+PSI(psaBxH20_sWT_d241111)250nM+C6(GCr_E69Q)2.0uM+mv()1mM-352	comment	705nm Lz_Ppo: dad()0.5mM+mgcl()2.5mM+asc()10mM+kcl()3.0mM+PSI(psaBxH20_sWT_d241111)250nM+C6(GCr_E69Q)2.5uM+mv()1mM-352	comment	740nm Lz_Ppo: dad()0.5mM+mgcl()2.5mM+asc()10mM+kcl()3.0mM+PSI(psaBxH20_sWT_d241111)250nM+C6(GCr_E69Q)2.5uM+mv()1mM-352	comment	705nm Lz_Ppo: dad()0.5mM+mgcl()2.5mM+asc()10mM+kcl()3.0mM+PSI(psaBxH20_sWT_d241111)250nM+C6(GCr_E69Q)3.0uM+mv()1mM-352	comment	740nm Lz_Ppo: dad()0.5mM+mgcl()2.5mM+asc()10mM+kcl()3.0mM+PSI(psaBxH20_sWT_d241111)250nM+C6(GCr_E69Q)3.0uM+mv()1mM-352	comment	705nm Lz_Ppo: dad()0.5mM+mgcl()2.5mM+asc()10mM+kcl()3.0mM+PSI(psaBxH20_sWT_d241111)250nM+C6(GCr_E69Q)3.5uM+mv()1mM-352	comment	740nm Lz_Ppo: dad()0.5mM+mgcl()2.5mM+asc()10mM+kcl()3.0mM+PSI(psaBxH20_sWT_d241111)250nM+C6(GCr_E69Q)3.5uM+mv()1mM-352	comment	705nm Lz_Ppo: dad()0.5mM+mgcl()2.5mM+asc()10mM+kcl()3.0mM+PSI(psaBxH20_sWT_d241111)250nM+C6(GCr_E69Q)4.0uM+mv()1mM-352	comment	740nm Lz_Ppo: dad()0.5mM+mgcl()2.5mM+asc()10mM+kcl()3.0mM+PSI(psaBxH20_sWT_d241111)250nM+C6(GCr_E69Q)4.0uM+mv()1mM-352	comment	705nm Lz_Ppo: dad()0.5mM+mgcl()2.5mM+asc()10mM+kcl()3.0mM+PSI(psaBxH20_sWT_d241111)250nM+C6(GCr_E70Q)0.0uM+mv()1mM-353	comment	740nm Lz_Ppo: dad()0.5mM+mgcl()2.5mM+asc()10mM+kcl()3.0mM+PSI(psaBxH20_sWT_d241111)250nM+C6(GCr_E70Q)0.0uM+mv()1mM-353	comment	705nm Lz_Ppo: dad()0.5mM+mgcl()2.5mM+asc()10mM+kcl()3.0mM+PSI(psaBxH20_sWT_d241111)250nM+C6(GCr_E70Q)0.5uM+mv()1mM-353	comment	740nm Lz_Ppo: dad()0.5mM+mgcl()2.5mM+asc()10mM+kcl()3.0mM+PSI(psaBxH20_sWT_d241111)250nM+C6(GCr_E70Q)0.5uM+mv()1mM-353
						timestamp	00:32:44.700000	timestamp	00:32:44.900000	timestamp	00:34:16.400000	timestamp	00:34:16.600000	timestamp	00:35:56.700000	timestamp	00:35:56.900000	timestamp	00:37:24.500000	timestamp	00:37:24.600000	timestamp	00:39:02.400000	timestamp	00:39:02.500000	timestamp	00:42:16.100000	timestamp	00:42:16.200000	timestamp	00:43:42.600000	timestamp	00:43:42.700000	timestamp	00:45:13.800000	timestamp	00:45:13.900000	timestamp	00:46:45.300000	timestamp	00:46:45.500000	timestamp	00:48:35.100000	timestamp	00:48:35.200000	timestamp	00:50:03.800000	timestamp	00:50:03.900000
						x	y	x	y	x	y	x	y	x	y	x	y	x	y	x	y	x	y	x	y	x	y	x	y	x	y	x	y	x	y	x	y	x	y	x	y	x	y	x	y	x	y	x	y
Data ID	WL	C6 type	exp	Column pos	6	0.0502029	0.00305807	0.0502029	0.00289259	0.0502029	0.00102713	0.0502029	0.00095821	0.0502029	-0.00284848	0.0502029	-0.00114561	0.0502029	-0.00307368	0.0502029	-0.000938932	0.0502029	0.000878038	0.0502029	0.00078477	0.0502029	0.000146275	0.0502029	9.822390580183082e-05	0.0502029	0.000885643	0.0502029	0.000600159	0.0502029	0.00034596	0.0502029	0.000326391	0.0502029	0.000483571	0.0502029	0.000336322	0.0502029	0.00512351	0.0502029	0.00451048	0.0502029	0.00117481	0.0502029	0.000816053
15252	705	E69Q	352	$H$3	7	0.100406	0.00303307	0.100406	0.00285153	0.100406	0.000930214	0.100406	0.000942582	0.100406	-0.0029044	0.100406	-0.00122341	0.100406	-0.00314578	0.100406	-0.000948612	0.100406	0.000916425	0.100406	0.000761657	0.100406	1.741750043026541e-05	0.100406	1.473904316667829e-05	0.100406	0.000787921	0.100406	0.000570166	0.100406	0.000293017	0.100406	0.000291308	0.100406	0.0004947	0.100406	0.000405816	0.100406	0.00500054	0.100406	0.0044057	0.100406	0.0011822	0.100406	0.000828063
15253	740	E69Q	352	$J$3	8	0.150609	0.002948	0.150609	0.00272305	0.150609	0.000924453	0.150609	0.00084114	0.150609	-0.00288405	0.150609	-0.00120524	0.150609	-0.00310189	0.150609	-0.000984651	0.150609	0.000724051	0.150609	0.000617065	0.150609	4.384962165777245e-05	0.150609	7.383454806253464e-05	0.150609	0.000791043	0.150609	0.000492603	0.150609	0.000212765	0.150609	0.000168116	0.150609	0.000387574	0.150609	0.000304756	0.150609	0.00478452	0.150609	0.00434054	0.150609	0.00115243	0.150609	0.000851203
15254	705	E69Q	352	$L$3	9	0.200812	0.00297158	0.200812	0.00275825	0.200812	0.00072885	0.200812	0.000701937	0.200812	-0.00295475	0.200812	-0.00131451	0.200812	-0.00313808	0.200812	-0.00097747	0.200812	0.000666855	0.200812	0.000629062	0.200812	0.000110793	0.200812	2.9495180181693392e-05	0.200812	0.000748673	0.200812	0.00048577	0.200812	0.000215685	0.200812	0.00020003	0.200812	0.000377282	0.200812	0.00027123	0.200812	0.00469129	0.200812	0.00422769	0.200812	0.00109579	0.200812	0.000800724
15255	740	E69Q	352	$N$3	10	0.251014	0.00288872	0.251014	0.00273162	0.251014	0.000722495	0.251014	0.000746555	0.251014	-0.0029682	0.251014	-0.00132334	0.251014	-0.0032361	0.251014	-0.00106778	0.251014	0.000606559	0.251014	0.000575993	0.251014	-5.69e-05	0.251014	9.105243881313285e-06	0.251014	0.000655292	0.251014	0.000488423	0.251014	0.000185988	0.251014	0.000188682	0.251014	0.000365203	0.251014	0.000279872	0.251014	0.00469694	0.251014	0.0042383	0.251014	0.00103722	0.251014	0.000693052
15256	705	E69Q	352	$P$3	11	0.301217	0.00291672	0.301217	0.00271296	0.301217	0.000838526	0.301217	0.000712453	0.301217	-0.00302679	0.301217	-0.00132356	0.301217	-0.00327928	0.301217	-0.00112736	0.301217	0.000697482	0.301217	0.000658595	0.301217	-9.15e-05	0.301217	1.422735337514025e-05	0.301217	0.000586639	0.301217	0.000396712	0.301217	7.891036827321505e-05	0.301217	0.000156088	0.301217	0.000228154	0.301217	0.000187693	0.301217	0.00471162	0.301217	0.0041931	0.301217	0.000954355	0.301217	0.000681388
15257	740	E69Q	352	$R$3	12	0.35142	0.00281003	0.35142	0.00264625	0.35142	0.000827429	0.35142	0.00074571	0.35142	-0.00304938	0.35142	-0.00138148	0.35142	-0.00327008	0.35142	-0.00110109	0.35142	0.000609731	0.35142	0.000494858	0.35142	-3.71e-05	0.35142	-2.21e-05	0.35142	0.000686316	0.35142	0.000412304	0.35142	9.050019463949666e-05	0.35142	0.000113699	0.35142	0.000359042	0.35142	0.000242483	0.35142	0.00464043	0.35142	0.00413341	0.35142	0.00103773	0.35142	0.000731464
15258	705	E69Q	352	$T$3	13	0.401623	0.00280269	0.401623	0.00266246	0.401623	0.000770389	0.401623	0.000759704	0.401623	-0.0030534	0.401623	-0.00133879	0.401623	-0.00329962	0.401623	-0.0011179	0.401623	0.000614371	0.401623	0.000576191	0.401623	-0.000120694	0.401623	-3.13e-05	0.401623	0.000628031	0.401623	0.000382445	0.401623	4.628753973619747e-05	0.401623	7.799913155134494e-05	0.401623	0.000304375	0.401623	0.00022193	0.401623	0.00477228	0.401623	0.00421448	0.401623	0.00104724	0.401623	0.00069624
15259	740	E69Q	352	$V$3	14	0.451826	0.00268215	0.451826	0.00250572	0.451826	0.000679814	0.451826	0.000655358	0.451826	-0.00302158	0.451826	-0.00142451	0.451826	-0.00328848	0.451826	-0.00112016	0.451826	0.000590133	0.451826	0.000526919	0.451826	-3.58e-05	0.451826	-2.76e-05	0.451826	0.00063345	0.451826	0.000391511	0.451826	0.000135959	0.451826	0.000119998	0.451826	0.000298294	0.451826	0.00017575	0.451826	0.00463403	0.451826	0.00412307	0.451826	0.00102254	0.451826	0.000702384
15260	705	E69Q	352	$X$3	15	0.502029	0.00276824	0.502029	0.00258616	0.502029	0.000711085	0.502029	0.000656669	0.502029	-0.00306266	0.502029	-0.00136985	0.502029	-0.00330106	0.502029	-0.00112982	0.502029	0.000605302	0.502029	0.000528699	0.502029	-7.76e-05	0.502029	1.532595207864862e-05	0.502029	0.000584179	0.502029	0.000359221	0.502029	0.000120787	0.502029	0.000135927	0.502029	0.000267174	0.502029	0.000227786	0.502029	0.00460167	0.502029	0.00412202	0.502029	0.000982435	0.502029	0.000701656
15261	740	E69Q	352	$Z$3	16	0.552232	0.00276918	0.552232	0.00259473	0.552232	0.000652461	0.552232	0.000681021	0.552232	-0.00323195	0.552232	-0.00148315	0.552232	-0.00322423	0.552232	-0.00109449	0.552232	0.000599893	0.552232	0.00053033	0.552232	-0.00017505	0.552232	-8.39e-05	0.552232	0.000580972	0.552232	0.00038809	0.552232	0.0001529	0.552232	0.00017369	0.552232	0.000303304	0.552232	0.000270367	0.552232	0.00464237	0.552232	0.00417005	0.552232	0.00100122	0.552232	0.000598802
15264	705	E69Q	352	$AB$3	17	0.602435	0.0028068	0.602435	0.00260633	0.602435	0.000793106	0.602435	0.000706857	0.602435	-0.00310191	0.602435	-0.00147179	0.602435	-0.00334553	0.602435	-0.00113963	0.602435	0.000630121	0.602435	0.000522553	0.602435	-0.000152561	0.602435	-6.08e-05	0.602435	0.00064775	0.602435	0.000413195	0.602435	7.41081771154649e-05	0.602435	0.000110683	0.602435	0.000304311	0.602435	0.000213418	0.602435	0.00447978	0.602435	0.00408698	0.602435	0.000875505	0.602435	0.000618159
15265	740	E69Q	352	$AD$3	18	0.652638	0.0028202	0.652638	0.00257495	0.652638	0.000768332	0.652638	0.00074399	0.652638	-0.00309895	0.652638	-0.00136837	0.652638	-0.00329608	0.652638	-0.00116985	0.652638	0.000515258	0.652638	0.000441221	0.652638	-0.000121678	0.652638	-4.29e-05	0.652638	0.000518036	0.652638	0.000334784	0.652638	7.011175787890967e-05	0.652638	8.944437123083529e-05	0.652638	0.000272972	0.652638	0.000198514	0.652638	0.00445746	0.652638	0.00405608	0.652638	0.000881569	0.652638	0.000608035
15266	705	E69Q	352	$AF$3	19	0.702841	0.00269755	0.702841	0.00251387	0.702841	0.000789275	0.702841	0.000742597	0.702841	-0.0030885	0.702841	-0.00141768	0.702841	-0.00332633	0.702841	-0.00118179	0.702841	0.000620902	0.702841	0.000545831	0.702841	-0.000126483	0.702841	-6.46e-05	0.702841	0.000617492	0.702841	0.000374864	0.702841	-4.53e-06	0.702841	7.648370499369929e-05	0.702841	0.000308472	0.702841	0.000229939	0.702841	0.00457668	0.702841	0.00401184	0.702841	0.000973087	0.702841	0.000647081
15267	740	E69Q	352	$AH$3	20	0.753043	0.0026851	0.753043	0.00245682	0.753043	0.000742683	0.753043	0.000706688	0.753043	-0.00300321	0.753043	-0.00139026	0.753043	-0.00334119	0.753043	-0.00119808	0.753043	0.000583455	0.753043	0.000508971	0.753043	-0.000113651	0.753043	-5.94e-05	0.753043	0.000573225	0.753043	0.00040749	0.753043	6.349827536587804e-05	0.753043	0.00010454	0.753043	0.000203392	0.753043	0.00014226	0.753043	0.00449231	0.753043	0.00398799	0.753043	0.000880231	0.753043	0.000601252
15268	705	E69Q	352	$AJ$3	21	0.803246	0.00270166	0.803246	0.00252568	0.803246	0.00068295	0.803246	0.00066266	0.803246	-0.00309212	0.803246	-0.00145973	0.803246	-0.00341051	0.803246	-0.00120123	0.803246	0.000622641	0.803246	0.000506821	0.803246	-7.33e-05	0.803246	-3.81e-06	0.803246	0.000618361	0.803246	0.000425611	0.803246	0.000111884	0.803246	0.000151008	0.803246	0.000275015	0.803246	0.000177896	0.803246	0.00446501	0.803246	0.00399805	0.803246	0.000992427	0.803246	0.000672913
15269	740	E69Q	352	$AL$3	22	0.853449	0.0026687	0.853449	0.00248055	0.853449	0.000697979	0.853449	0.000637985	0.853449	-0.00315742	0.853449	-0.00150661	0.853449	-0.00338643	0.853449	-0.00125416	0.853449	0.000581137	0.853449	0.000566239	0.853449	-5.22e-05	0.853449	-2.52e-05	0.853449	0.000692316	0.853449	0.000494727	0.853449	6.307664514623138e-05	0.853449	8.952477430996392e-05	0.853449	0.000333375	0.853449	0.000192865	0.853449	0.00440022	0.853449	0.00393527	0.853449	0.000951377	0.853449	0.000582698
15270	705	E69Q	352	$AN$3	23	0.903652	0.00275954	0.903652	0.00253723	0.903652	0.000727966	0.903652	0.000654728	0.903652	-0.00321038	0.903652	-0.0014829	0.903652	-0.00335493	0.903652	-0.00117107	0.903652	0.000557801	0.903652	0.000471186	0.903652	-0.000132523	0.903652	-3.58e-05	0.903652	0.000603204	0.903652	0.000375679	0.903652	0.000140009	0.903652	0.00016181	0.903652	0.000380595	0.903652	0.000236294	0.903652	0.004392	0.903652	0.00390348	0.903652	0.000951688	0.903652	0.000628426
15271	740	E69Q	352	$AP$3	24	0.953855	0.0027038	0.953855	0.0024846	0.953855	0.000765396	0.953855	0.000735189	0.953855	-0.00319691	0.953855	-0.00147402	0.953855	-0.0034131	0.953855	-0.00123	0.953855	0.000615717	0.953855	0.000492748	0.953855	-0.000112272	0.953855	-4.38e-05	0.953855	0.00059745	0.953855	0.000369657	0.953855	1.0547311335395906e-05	0.953855	8.500510832084099e-05	0.953855	0.000202702	0.953855	0.000156143	0.953855	0.00445929	0.953855	0.00389783	0.953855	0.000870502	0.953855	0.000557018
15272	705	E70Q	353	$AR$3	25	1.00406	0.0025668	1.00406	0.002434	1.00406	0.000727124	1.00406	0.000658039	1.00406	-0.00307088	1.00406	-0.00138428	1.00406	-0.00341958	1.00406	-0.00126828	1.00406	0.000589483	1.00406	0.000590399	1.00406	-9.62e-05	1.00406	-1.52e-05	1.00406	0.000649301	1.00406	0.00042817	1.00406	5.855239640376237e-05	1.00406	0.000112296	1.00406	0.000284999	1.00406	0.000201296	1.00406	0.00446224	1.00406	0.0039464	1.00406	0.0009584	1.00406	0.000634497
15273	740	E70Q	353	$AT$3	26	1.00492	-0.00206402	1.00492	0.00267818	1.00492	-0.00573678	1.00492	0.000730979	1.00492	-0.00958655	1.00492	-0.0014487	1.00492	-0.00966417	1.00492	-0.00123815	1.00492	-0.00579276	1.00492	0.000396804	1.00492	-0.00656944	1.00492	-6.07e-05	1.00492	-0.00526174	1.00492	0.000443277	1.00492	-0.00618345	1.00492	4.7153558683789634e-05	1.00492	-0.00596268	1.00492	9.478402647776496e-05	1.00492	-0.00182072	1.00492	0.00388598	1.00492	-0.0052458	1.00492	0.000589791
15274	705	E70Q	353	$AV$3	27	1.00566	-0.00184954	1.00566	0.00281837	1.00566	-0.00552236	1.00566	0.000987745	1.00566	-0.00917317	1.00566	-0.0011337	1.00566	-0.0093524	1.00566	-0.000989609	1.00566	-0.00543755	1.00566	0.000722609	1.00566	-0.00624344	1.00566	0.000114644	1.00566	-0.00498887	1.00566	0.00065393	1.00566	-0.00588014	1.00566	0.000264073	1.00566	-0.00550128	1.00566	0.00039562	1.00566	-0.0014927	1.00566	0.00415931	1.00566	-0.00506986	1.00566	0.000771746
15275	740	E70Q	353	$AX$3	28	1.00645	-0.00197075	1.00645	0.00275811	1.00645	-0.00551375	1.00645	0.000887241	1.00645	-0.00912891	1.00645	-0.00115457	1.00645	-0.00928634	1.00645	-0.00096925	1.00645	-0.00540937	1.00645	0.00068784	1.00645	-0.0061024	1.00645	0.000152058	1.00645	-0.00485256	1.00645	0.000628617	1.00645	-0.00554983	1.00645	0.000319781	1.00645	-0.00538787	1.00645	0.000373908	1.00645	-0.00159509	1.00645	0.00407725	1.00645	-0.00492478	1.00645	0.000811034
15276	705	E70Q	353	$AZ$3	29	1.00729	-0.00192196	1.00729	0.0027683	1.00729	-0.00548225	1.00729	0.000836957	1.00729	-0.0090371	1.00729	-0.00109215	1.00729	-0.0091626	1.00729	-0.00101827	1.00729	-0.00515622	1.00729	0.00074499	1.00729	-0.00605061	1.00729	0.000106301	1.00729	-0.00464881	1.00729	0.000604756	1.00729	-0.00538567	1.00729	0.000328141	1.00729	-0.00517449	1.00729	0.000413793	1.00729	-0.00152424	1.00729	0.00412696	1.00729	-0.0049055	1.00729	0.00080473
15277	740	E70Q	353	$BB$3	30	1.00819	-0.00195473	1.00819	0.00266965	1.00819	-0.00528369	1.00819	0.000993054	1.00819	-0.00901083	1.00819	-0.0011936	1.00819	-0.00903282	1.00819	-0.000982539	1.00819	-0.00509665	1.00819	0.00072009	1.00819	-0.00577513	1.00819	0.000110255	1.00819	-0.00461768	1.00819	0.000567417	1.00819	-0.00535631	1.00819	0.000249345	1.00819	-0.00491457	1.00819	0.000455684	1.00819	-0.0014487	1.00819	0.00413909	1.00819	-0.00476031	1.00819	0.000830719
15278	705	E70Q	353	$BD$3	31	1.00914	-0.00182262	1.00914	0.00267363	1.00914	-0.00532058	1.00914	0.000891807	1.00914	-0.00880777	1.00914	-0.00113874	1.00914	-0.00898338	1.00914	-0.00102528	1.00914	-0.00490389	1.00914	0.00066799	1.00914	-0.00556344	1.00914	0.000126983	1.00914	-0.00435007	1.00914	0.000635135	1.00914	-0.00501036	1.00914	0.000337835	1.00914	-0.00471087	1.00914	0.000366034	1.00914	-0.00135431	1.00914	0.00417598	1.00914	-0.00477165	1.00914	0.000806973
15279	740	E70Q	353	$BF$3	32	1.01015	-0.00174786	1.01015	0.00267451	1.01015	-0.00509932	1.01015	0.000923945	1.01015	-0.00879385	1.01015	-0.00121987	1.01015	-0.00887603	1.01015	-0.00101329	1.01015	-0.00473298	1.01015	0.000695067	1.01015	-0.00550439	1.01015	8.661930313896837e-05	1.01015	-0.00410523	1.01015	0.000594917	1.01015	-0.00496549	1.01015	0.000262078	1.01015	-0.00465842	1.01015	0.000360751	1.01015	-0.00130438	1.01015	0.00417805	1.01015	-0.00476629	1.01015	0.000740614
15280	705	E70Q	353	$BH$3	33	1.01122	-0.00180829	1.01122	0.00268451	1.01122	-0.00502661	1.01122	0.00093586	1.01122	-0.00857546	1.01122	-0.00116463	1.01122	-0.00854502	1.01122	-0.000953843	1.01122	-0.00467982	1.01122	0.000706839	1.01122	-0.00527937	1.01122	0.000128918	1.01122	-0.00408095	1.01122	0.000552924	1.01122	-0.00464595	1.01122	0.000316149	1.01122	-0.00437216	1.01122	0.000419834	1.01122	-0.001249	1.01122	0.00412178	1.01122	-0.00448387	1.01122	0.000832818
15281	740	E70Q	353	$BJ$3	34	1.01236	-0.00167604	1.01236	0.00271476	1.01236	-0.00495655	1.01236	0.000974347	1.01236	-0.00846269	1.01236	-0.00115069	1.01236	-0.00846503	1.01236	-0.000951835	1.01236	-0.00446769	1.01236	0.000750547	1.01236	-0.00495537	1.01236	0.000144406	1.01236	-0.00375402	1.01236	0.000647787	1.01236	-0.00453085	1.01236	0.00028855	1.01236	-0.00416447	1.01236	0.000406162	1.01236	-0.00116187	1.01236	0.00407952	1.01236	-0.00439057	1.01236	0.00085765
15282	705	E70Q	353	$BL$3	35	1.01358	-0.00165763	1.01358	0.00267554	1.01358	-0.00492909	1.01358	0.000927359	1.01358	-0.00844983	1.01358	-0.00113009	1.01358	-0.00833244	1.01358	-0.000964565	1.01358	-0.00422823	1.01358	0.000783473	1.01358	-0.00490744	1.01358	0.000113502	1.01358	-0.00369618	1.01358	0.000608419	1.01358	-0.00424645	1.01358	0.000333353	1.01358	-0.00387399	1.01358	0.000393476	1.01358	-0.00107416	1.01358	0.00416724	1.01358	-0.00435056	1.01358	0.000861177
15283	740	E70Q	353	$BN$3	36	1.01487	-0.00163401	1.01487	0.00261514	1.01487	-0.00481425	1.01487	0.000962666	1.01487	-0.00815603	1.01487	-0.00112324	1.01487	-0.00813335	1.01487	-0.00093108	1.01487	-0.00401423	1.01487	0.000752207	1.01487	-0.00460339	1.01487	0.000132457	1.01487	-0.00349336	1.01487	0.000581525	1.01487	-0.00410425	1.01487	0.000293509	1.01487	-0.00369335	1.01487	0.000403904	1.01487	-0.00102315	1.01487	0.00411977	1.01487	-0.0041902	1.01487	0.000889191
15284	705	E70Q	353	$BP$3	37	1.01624	-0.00150192	1.01624	0.00269787	1.01624	-0.00457052	1.01624	0.00102827	1.01624	-0.00808686	1.01624	-0.0011756	1.01624	-0.00798781	1.01624	-0.00095703	1.01624	-0.0039492	1.01624	0.000750147	1.01624	-0.00447726	1.01624	0.000172648	1.01624	-0.00331835	1.01624	0.000578766	1.01624	-0.00393962	1.01624	0.000223169	1.01624	-0.00345526	1.01624	0.00040792	1.01624	-0.000777506	1.01624	0.00423355	1.01624	-0.00413621	1.01624	0.000845329
15285	740	E70Q	353	$BR$3	38	1.0177	-0.00144707	1.0177	0.00272741	1.0177	-0.0046	1.0177	0.000933561	1.0177	-0.00804063	1.0177	-0.00120091	1.0177	-0.00786256	1.0177	-0.00094769	1.0177	-0.00371082	1.0177	0.000708731	1.0177	-0.00418309	1.0177	0.000146859	1.0177	-0.00297362	1.0177	0.000605554	1.0177	-0.00365279	1.0177	0.000350655	1.0177	-0.00330676	1.0177	0.000351219	1.0177	-0.000727679	1.0177	0.0041883	1.0177	-0.00393096	1.0177	0.000858239
15286	705	E70Q	353	$BT$3	39	1.01924	-0.00138121	1.01924	0.00271328	1.01924	-0.00445055	1.01924	0.000952076	1.01924	-0.00779363	1.01924	-0.00114444	1.01924	-0.00778049	1.01924	-0.000974596	1.01924	-0.00352418	1.01924	0.000720963	1.01924	-0.00405817	1.01924	0.000140668	1.01924	-0.00281291	1.01924	0.000670357	1.01924	-0.00348139	1.01924	0.00031005	1.01924	-0.00304197	1.01924	0.000437366	1.01924	-0.000699431	1.01924	0.00416247	1.01924	-0.00382036	1.01924	0.000863382
15287	740	E70Q	353	$BV$3	40	1.02089	-0.00134435	1.02089	0.00266812	1.02089	-0.00427479	1.02089	0.000926805	1.02089	-0.007674	1.02089	-0.00116498	1.02089	-0.00752672	1.02089	-0.000892451	1.02089	-0.00337529	1.02089	0.000754538	1.02089	-0.00399715	1.02089	4.3572312523609824e-05	1.02089	-0.00271283	1.02089	0.000622757	1.02089	-0.00340468	1.02089	0.000267773	1.02089	-0.00289383	1.02089	0.000418005	1.02089	-0.000495926	1.02089	0.00421267	1.02089	-0.00371593	1.02089	0.000857682
15288	705	E70Q	353	$BX$3	41	1.02264	-0.00119349	1.02264	0.0027224	1.02264	-0.00412374	1.02264	0.000915482	1.02264	-0.0074433	1.02264	-0.0011841	1.02264	-0.00730404	1.02264	-0.000938195	1.02264	-0.00329049	1.02264	0.000693715	1.02264	-0.00378214	1.02264	8.72698592838117e-05	1.02264	-0.00257857	1.02264	0.000518901	1.02264	-0.00315912	1.02264	0.000301612	1.02264	-0.00272418	1.02264	0.000392029	1.02264	-0.000566079	1.02264	0.00408487	1.02264	-0.00367448	1.02264	0.000859595
15289	740	E70Q	353	$BZ$3	42	1.0245	-0.00112044	1.0245	0.00278001	1.0245	-0.00400516	1.0245	0.000997679	1.0245	-0.00739854	1.0245	-0.00117862	1.0245	-0.00715363	1.0245	-0.000914403	1.0245	-0.00298431	1.0245	0.000699504	1.0245	-0.00347498	1.0245	0.000149562	1.0245	-0.00231801	1.0245	0.000649047	1.0245	-0.00294686	1.0245	0.000364208	1.0245	-0.00261594	1.0245	0.000357799	1.0245	-0.000286409	1.0245	0.00421924	1.0245	-0.00354058	1.0245	0.000864611
15290	705	E71Q	354	$CB$3	43	1.02648	-0.0010317	1.02648	0.00270812	1.02648	-0.0040845	1.02648	0.000931324	1.02648	-0.00725072	1.02648	-0.00120462	1.02648	-0.0069658	1.02648	-0.000967749	1.02648	-0.00279329	1.02648	0.000753184	1.02648	-0.00344243	1.02648	6.819507502836553e-05	1.02648	-0.00227644	1.02648	0.000546304	1.02648	-0.00288845	1.02648	0.000208364	1.02648	-0.00242425	1.02648	0.000320882	1.02648	-0.000176896	1.02648	0.00422017	1.02648	-0.00342062	1.02648	0.000839596
15291	740	E71Q	354	$CD$3	44	1.02859	-0.000889518	1.02859	0.0027701	1.02859	-0.00385243	1.02859	0.000934283	1.02859	-0.00715126	1.02859	-0.00123683	1.02859	-0.00696665	1.02859	-0.00100553	1.02859	-0.00274603	1.02859	0.000701401	1.02859	-0.00312641	1.02859	8.790180469780973e-05	1.02859	-0.00198708	1.02859	0.000666065	1.02859	-0.00258548	1.02859	0.000307082	1.02859	-0.00233368	1.02859	0.00033406	1.02859	-0.000102556	1.02859	0.00420592	1.02859	-0.00331691	1.02859	0.000799879
15292	705	E71Q	354	$CF$3	45	1.03082	-0.000853455	1.03082	0.00271292	1.03082	-0.00366446	1.03082	0.000931838	1.03082	-0.00695248	1.03082	-0.00121156	1.03082	-0.00664377	1.03082	-0.000952506	1.03082	-0.00244719	1.03082	0.000730934	1.03082	-0.00297064	1.03082	5.538635303703465e-05	1.03082	-0.00182469	1.03082	0.000596375	1.03082	-0.00257713	1.03082	0.000168915	1.03082	-0.00215603	1.03082	0.000341766	1.03082	-3.74e-05	1.03082	0.00413731	1.03082	-0.0031621	1.03082	0.000874176
15293	740	E71Q	354	$CH$3	46	1.0332	-0.000735547	1.0332	0.00268937	1.0332	-0.00369243	1.0332	0.000861624	1.0332	-0.00679939	1.0332	-0.00127433	1.0332	-0.00664061	1.0332	-0.00109373	1.0332	-0.00229887	1.0332	0.000706286	1.0332	-0.00283412	1.0332	4.828643093079954e-05	1.0332	-0.0016821	1.0332	0.000590538	1.0332	-0.00232008	1.0332	0.000265621	1.0332	-0.00197438	1.0332	0.000312824	1.0332	0.000136052	1.0332	0.00420758	1.0332	-0.00294387	1.0332	0.000816681
15296	705	E71Q	354	$CJ$3	47	1.03572	-0.000741079	1.03572	0.00270344	1.03572	-0.00340336	1.03572	0.0009298	1.03572	-0.00658381	1.03572	-0.00122232	1.03572	-0.00640387	1.03572	-0.000968486	1.03572	-0.00213982	1.03572	0.000702999	1.03572	-0.00260073	1.03572	9.757336802035388e-05	1.03572	-0.00146443	1.03572	0.000595401	1.03572	-0.0021825	1.03572	0.000231829	1.03572	-0.00188012	1.03572	0.000267461	1.03572	0.000105102	1.03572	0.00410933	1.03572	-0.00285599	1.03572	0.000868128
15297	740	E71Q	354	$CL$3	48	1.03841	-0.000613077	1.03841	0.00264847	1.03841	-0.00326345	1.03841	0.000950907	1.03841	-0.00649812	1.03841	-0.00126376	1.03841	-0.00619859	1.03841	-0.00100697	1.03841	-0.00196274	1.03841	0.000675216	1.03841	-0.002504	1.03841	9.622607411108319e-05	1.03841	-0.00146927	1.03841	0.000536995	1.03841	-0.00196064	1.03841	0.000301195	1.03841	-0.00176574	1.03841	0.000282716	1.03841	0.000250365	1.03841	0.00415377	1.03841	-0.00287261	1.03841	0.000730295
15298	705	E71Q	354	$CN$3	49	1.04126	-0.000576405	1.04126	0.00259685	1.04126	-0.00305076	1.04126	0.000954806	1.04126	-0.00626693	1.04126	-0.00122511	1.04126	-0.0061396	1.04126	-0.00106683	1.04126	-0.0018271	1.04126	0.000659694	1.04126	-0.00237667	1.04126	5.1394281743055714e-05	1.04126	-0.00123749	1.04126	0.000547727	1.04126	-0.00189645	1.04126	0.000193401	1.04126	-0.00156225	1.04126	0.000304846	1.04126	0.000432258	1.04126	0.00417882	1.04126	-0.00261809	1.04126	0.000772517
15299	740	E71Q	354	$CP$3	50	1.0443	-0.00042265	1.0443	0.00265358	1.0443	-0.00299843	1.0443	0.000959855	1.0443	-0.00613203	1.0443	-0.00120175	1.0443	-0.0059425	1.0443	-0.00103646	1.0443	-0.00179442	1.0443	0.000597735	1.0443	-0.00220774	1.0443	5.6128775268171616e-05	1.0443	-0.00126081	1.0443	0.000465865	1.0443	-0.00170913	1.0443	0.000276873	1.0443	-0.00147832	1.0443	0.0003283	1.0443	0.00057977	1.0443	0.00411371	1.0443	-0.00238086	1.0443	0.000791437
15300	705	E71Q	354	$CR$3	51	1.04753	-0.000281531	1.04753	0.00265795	1.04753	-0.00283308	1.04753	0.000904979	1.04753	-0.00584866	1.04753	-0.00118984	1.04753	-0.00574002	1.04753	-0.000992151	1.04753	-0.00146659	1.04753	0.000660529	1.04753	-0.00201579	1.04753	9.254826212784506e-05	1.04753	-0.000994078	1.04753	0.000521298	1.04753	-0.00162488	1.04753	0.000191757	1.04753	-0.00132771	1.04753	0.000312451	1.04753	0.000670093	1.04753	0.00411331	1.04753	-0.00229045	1.04753	0.000861344
15301	740	E71Q	354	$CT$3	52	1.05095	-0.000203671	1.05095	0.00262092	1.05095	-0.00264028	1.05095	0.000953014	1.05095	-0.00590391	1.05095	-0.00129443	1.05095	-0.00561683	1.05095	-0.00104534	1.05095	-0.00145271	1.05095	0.000576527	1.05095	-0.00185561	1.05095	8.246399362088486e-05	1.05095	-0.000931679	1.05095	0.000548665	1.05095	-0.00142849	1.05095	0.000251877	1.05095	-0.00120924	1.05095	0.00029353	1.05095	0.00086806	1.05095	0.00410617	1.05095	-0.00211804	1.05095	0.000798532
15302	705	E71Q	354	$CV$3	53	1.0546	2.1403789822059885e-05	1.0546	0.00266716	1.0546	-0.00259378	1.0546	0.000864621	1.0546	-0.00570576	1.0546	-0.00132422	1.0546	-0.0054107	1.0546	-0.00102139	1.0546	-0.00133543	1.0546	0.000589935	1.0546	-0.00180634	1.0546	5.786414880326607e-05	1.0546	-0.000797915	1.0546	0.00050084	1.0546	-0.00134344	1.0546	0.000207271	1.0546	-0.00105459	1.0546	0.000314529	1.0546	0.000992113	1.0546	0.00416489	1.0546	-0.00214351	1.0546	0.000723032
15303	740	E71Q	354	$CX$3	54	1.05848	0.000130845	1.05848	0.00266558	1.05848	-0.00231514	1.05848	0.000901354	1.05848	-0.00561143	1.05848	-0.00137143	1.05848	-0.00527429	1.05848	-0.00107096	1.05848	-0.00119137	1.05848	0.000576222	1.05848	-0.0016467	1.05848	5.185617239006346e-05	1.05848	-0.000680104	1.05848	0.000496709	1.05848	-0.00127225	1.05848	0.000193924	1.05848	-0.00103311	1.05848	0.000267589	1.05848	0.00109825	1.05848	0.0040708	1.05848	-0.00184399	1.05848	0.000785577
15304	705	E71Q	354	$CZ$3	55	1.0626	0.000230107	1.0626	0.00269228	1.0626	-0.0022359	1.0626	0.000911709	1.0626	-0.00523825	1.0626	-0.00127481	1.0626	-0.00521705	1.0626	-0.00113177	1.0626	-0.00104195	1.0626	0.000633053	1.0626	-0.00162843	1.0626	-4.77e-07	1.0626	-0.000559461	1.0626	0.000559067	1.0626	-0.00116793	1.0626	0.000218344	1.0626	-0.00101238	1.0626	0.000249653	1.0626	0.00127242	1.0626	0.00413583	1.0626	-0.00167177	1.0626	0.000746491
15305	740	E71Q	354	$DB$3	56	1.06697	0.000296395	1.06697	0.00263797	1.06697	-0.00206522	1.06697	0.00084719	1.06697	-0.00516856	1.06697	-0.00132019	1.06697	-0.00492981	1.06697	-0.00102462	1.06697	-0.000784212	1.06697	0.000664525	1.06697	-0.00145455	1.06697	2.248643072305656e-05	1.06697	-0.00043929	1.06697	0.000516271	1.06697	-0.00120188	1.06697	0.000141388	1.06697	-0.000939963	1.06697	0.000216751	1.06697	0.00146652	1.06697	0.00409328	1.06697	-0.00159405	1.06697	0.000739825
15306	705	E71Q	354	$DD$3	57	1.07163	0.000391238	1.07163	0.00268857	1.07163	-0.00189186	1.07163	0.00084687	1.07163	-0.00495689	1.07163	-0.00130638	1.07163	-0.00482866	1.07163	-0.00112965	1.07163	-0.00082193	1.07163	0.000565435	1.07163	-0.00132361	1.07163	1.5667494291216055e-05	1.07163	-0.000346941	1.07163	0.000568094	1.07163	-0.000988439	1.07163	0.000159726	1.07163	-0.000873932	1.07163	0.000192878	1.07163	0.00150088	1.07163	0.00407185	1.07163	-0.00141895	1.07163	0.000740138
15307	740	E71Q	354	$DF$3	58	1.07658	0.000409238	1.07658	0.00254917	1.07658	-0.00176582	1.07658	0.000867595	1.07658	-0.00479054	1.07658	-0.00132373	1.07658	-0.00476493	1.07658	-0.00107783	1.07658	-0.000647429	1.07658	0.000569682	1.07658	-0.00124879	1.07658	-4.07e-06	1.07658	-0.000286384	1.07658	0.000507456	1.07658	-0.000924976	1.07658	0.000164012	1.07658	-0.000620286	1.07658	0.000298087	1.07658	0.00174935	1.07658	0.00408128	1.07658	-0.0011936	1.07658	0.000752496
15308	705	E71Q	354	$DH$3	59	1.08184	0.000625369	1.08184	0.00268105	1.08184	-0.00152345	1.08184	0.000875365	1.08184	-0.00456629	1.08184	-0.00126807	1.08184	-0.00461297	1.08184	-0.00109904	1.08184	-0.000392525	1.08184	0.000656822	1.08184	-0.00119899	1.08184	-2.3e-05	1.08184	-0.000259492	1.08184	0.000465687	1.08184	-0.000906618	1.08184	0.000115927	1.08184	-0.000642266	1.08184	0.000256837	1.08184	0.0019063	1.08184	0.00409223	1.08184	-0.0010791	1.08184	0.000712117
15309	740	E71Q	354	$DJ$3	60	1.08743	0.000745601	1.08743	0.00263243	1.08743	-0.00143394	1.08743	0.000827527	1.08743	-0.00448918	1.08743	-0.00125131	1.08743	-0.00444752	1.08743	-0.00107058	1.08743	-0.000399534	1.08743	0.000607605	1.08743	-0.00108274	1.08743	-1.15e-05	1.08743	-7.98e-05	1.08743	0.000542133	1.08743	-0.000728753	1.08743	0.000153484	1.08743	-0.000535124	1.08743	0.000187027	1.08743	0.00201302	1.08743	0.00402887	1.08743	-0.000889403	1.08743	0.000715533
15310	705	E69Q/E70Q	355	$DL$3	61	1.09338	0.000836657	1.09338	0.00258965	1.09338	-0.00122457	1.09338	0.000774084	1.09338	-0.00440313	1.09338	-0.00140667	1.09338	-0.00447796	1.09338	-0.00112198	1.09338	-0.0003422	1.09338	0.000560424	1.09338	-0.000858916	1.09338	3.431361730371618e-05	1.09338	1.7077408021765137e-05	1.09338	0.000560248	1.09338	-0.000632184	1.09338	0.000116762	1.09338	-0.000442988	1.09338	0.000212389	1.09338	0.00214124	1.09338	0.00403526	1.09338	-0.000894139	1.09338	0.00069456
15311	740	E69Q/E70Q	355	$DN$3	62	1.09969	0.000953858	1.09969	0.00259235	1.09969	-0.00111363	1.09969	0.000771404	1.09969	-0.00423514	1.09969	-0.00131081	1.09969	-0.00428014	1.09969	-0.00116872	1.09969	-0.000323273	1.09969	0.000514089	1.09969	-0.000858726	1.09969	6.9408838702100795e-06	1.09969	0.000147043	1.09969	0.000560793	1.09969	-0.00061786	1.09969	0.000171105	1.09969	-0.000380341	1.09969	0.000240251	1.09969	0.00221876	1.09969	0.00403721	1.09969	-0.000656171	1.09969	0.000709961
15312	705	E69Q/E70Q	355	$DP$3	63	1.10641	0.00116018	1.10641	0.00263117	1.10641	-0.00101625	1.10641	0.000793531	1.10641	-0.0041619	1.10641	-0.00135867	1.10641	-0.004182	1.10641	-0.00110319	1.10641	-8.65e-05	1.10641	0.000551866	1.10641	-0.00068969	1.10641	1.4137883035947318e-06	1.10641	9.652594384906192e-05	1.10641	0.000487363	1.10641	-0.000583082	1.10641	0.000105308	1.10641	-0.000261532	1.10641	0.000183081	1.10641	0.00245915	1.10641	0.00399444	1.10641	-0.000546301	1.10641	0.000701416
15313	740	E69Q/E70Q	355	$DR$3	64	1.11355	0.0012764	1.11355	0.00263793	1.11355	-0.000820423	1.11355	0.000847174	1.11355	-0.00407763	1.11355	-0.00140479	1.11355	-0.0040421	1.11355	-0.00113229	1.11355	5.0822903486791304e-06	1.11355	0.00055749	1.11355	-0.000753057	1.11355	-2.66e-05	1.11355	9.620459764973647e-05	1.11355	0.000441085	1.11355	-0.000410027	1.11355	0.000170397	1.11355	-0.000239648	1.11355	0.00019866	1.11355	0.00255392	1.11355	0.00397839	1.11355	-0.000478981	1.11355	0.00073169
15314	705	E69Q/E70Q	355	$DT$3	65	1.12114	0.0012558	1.12114	0.00246993	1.12114	-0.000636277	1.12114	0.000805578	1.12114	-0.00389871	1.12114	-0.00135184	1.12114	-0.00411481	1.12114	-0.0012051	1.12114	5.706826598179775e-05	1.12114	0.000588263	1.12114	-0.000682971	1.12114	-1.37e-05	1.12114	0.000273822	1.12114	0.000509144	1.12114	-0.000437416	1.12114	0.000123562	1.12114	-0.000268809	1.12114	0.000197746	1.12114	0.00261182	1.12114	0.00395405	1.12114	-0.000263948	1.12114	0.000642095
15315	740	E69Q/E70Q	355	$DV$3	66	1.12921	0.00139134	1.12921	0.00255338	1.12921	-0.000489374	1.12921	0.000839849	1.12921	-0.00386682	1.12921	-0.00140215	1.12921	-0.00392977	1.12921	-0.00117379	1.12921	0.000132209	1.12921	0.0005657	1.12921	-0.000548861	1.12921	1.4626837560038908e-05	1.12921	0.000309317	1.12921	0.000475181	1.12921	-0.000327789	1.12921	0.000168392	1.12921	-6.08e-05	1.12921	0.000249208	1.12921	0.00292219	1.12921	0.00398158	1.12921	-0.000232609	1.12921	0.00063272
15316	705	E69Q/E70Q	355	$DX$3	67	1.13779	0.00162632	1.13779	0.00256932	1.13779	-0.000372675	1.13779	0.000814116	1.13779	-0.00374968	1.13779	-0.00140598	1.13779	-0.00386675	1.13779	-0.00112258	1.13779	0.000177635	1.13779	0.000544457	1.13779	-0.000536115	1.13779	-2.68e-05	1.13779	0.000322573	1.13779	0.000468465	1.13779	-0.000208582	1.13779	0.000223252	1.13779	-0.000163964	1.13779	0.000176837	1.13779	0.00291497	1.13779	0.00396163	1.13779	-8e-06	1.13779	0.000675459
15317	740	E69Q/E70Q	355	$DZ$3	68	1.14691	0.00155909	1.14691	0.00246723	1.14691	-0.000341119	1.14691	0.000723686	1.14691	-0.00365385	1.14691	-0.00138118	1.14691	-0.00382099	1.14691	-0.00114098	1.14691	0.000126034	1.14691	0.000514226	1.14691	-0.000425612	1.14691	-5.21e-06	1.14691	0.00031909	1.14691	0.000420888	1.14691	-0.000178553	1.14691	0.000177966	1.14691	-5.43e-05	1.14691	0.000269177	1.14691	0.00304062	1.14691	0.00394543	1.14691	9.141100872655421e-05	1.14691	0.000658054
15318	705	E69Q/E70Q	355	$EB$3	69	1.1566	0.00181481	1.1566	0.00260357	1.1566	-0.00016834	1.1566	0.000739246	1.1566	-0.00367266	1.1566	-0.00143932	1.1566	-0.00369635	1.1566	-0.00114356	1.1566	0.000184112	1.1566	0.000474241	1.1566	-0.000357294	1.1566	2.7619952547408566e-05	1.1566	0.000390901	1.1566	0.00044248	1.1566	-0.00017374	1.1566	0.000131462	1.1566	-4.19e-05	1.1566	0.000209043	1.1566	0.0032908	1.1566	0.0040087	1.1566	0.000115105	1.1566	0.000635759
15319	740	E69Q/E70Q	355	$ED$3	70	1.16691	0.00174678	1.16691	0.0024723	1.16691	-2.3e-05	1.16691	0.000727872	1.16691	-0.00350728	1.16691	-0.00141201	1.16691	-0.00363798	1.16691	-0.00117274	1.16691	0.000331705	1.16691	0.000516505	1.16691	-0.000263722	1.16691	8.695063630048683e-06	1.16691	0.00047473	1.16691	0.000456128	1.16691	-0.000133141	1.16691	9.647906854121785e-05	1.16691	7.877408670432622e-05	1.16691	0.000211345	1.16691	0.00337283	1.16691	0.00395054	1.16691	0.000273604	1.16691	0.000631947
15320	705	E69Q/E70Q	355	$EF$3	71	1.17786	0.00195947	1.17786	0.00252609	1.17786	7.32979657817527e-05	1.17786	0.000754446	1.17786	-0.0035093	1.17786	-0.00144714	1.17786	-0.00369481	1.17786	-0.00117876	1.17786	0.000293356	1.17786	0.000471063	1.17786	-0.00022656	1.17786	-1.9e-05	1.17786	0.00043116	1.17786	0.000427811	1.17786	-0.000173916	1.17786	8.950720120345403e-05	1.17786	9.92865369230816e-05	1.17786	0.000192002	1.17786	0.00340913	1.17786	0.00390978	1.17786	0.000388971	1.17786	0.000651163
15321	740	E69Q/E70Q	355	$EH$3	72	1.1895	0.00197297	1.1895	0.00245792	1.1895	0.000182402	1.1895	0.00076371	1.1895	-0.00331257	1.1895	-0.00137806	1.1895	-0.00358348	1.1895	-0.00116158	1.1895	0.000415911	1.1895	0.000560448	1.1895	-0.000220816	1.1895	1.720990722037241e-05	1.1895	0.000495017	1.1895	0.000441023	1.1895	-7.49e-05	1.1895	0.000121705	1.1895	0.000169528	1.1895	0.000245273	1.1895	0.00361669	1.1895	0.00390728	1.1895	0.000330776	1.1895	0.00058105
15322	705	E69Q/E70Q	355	$EJ$3	73	1.20188	0.00209913	1.20188	0.00253497	1.20188	0.000118543	1.20188	0.000682338	1.20188	-0.00331468	1.20188	-0.00140176	1.20188	-0.00362226	1.20188	-0.00126539	1.20188	0.000514687	1.20188	0.000583935	1.20188	-0.000257754	1.20188	-3.62e-05	1.20188	0.00058603	1.20188	0.000461881	1.20188	-8.89e-05	1.20188	0.000126624	1.20188	0.00015048	1.20188	0.000235342	1.20188	0.00365221	1.20188	0.00389713	1.20188	0.000437791	1.20188	0.000616056
15323	740	E69Q/E70Q	355	$EL$3	74	1.21504	0.00208467	1.21504	0.00248757	1.21504	0.000263666	1.21504	0.000728753	1.21504	-0.00326342	1.21504	-0.00141347	1.21504	-0.00352517	1.21504	-0.00118572	1.21504	0.000532989	1.21504	0.000602223	1.21504	-0.000157566	1.21504	-7.3e-06	1.21504	0.000628912	1.21504	0.000481293	1.21504	-0.000124709	1.21504	2.1264648235029895e-05	1.21504	0.000146124	1.21504	0.000199214	1.21504	0.00371269	1.21504	0.00393016	1.21504	0.000647802	1.21504	0.000645678
15324	705	E69Q/E70Q	355	$EN$3	75	1.22903	0.00215136	1.22903	0.00240982	1.22903	0.000325418	1.22903	0.000713663	1.22903	-0.00322166	1.22903	-0.00142158	1.22903	-0.00350757	1.22903	-0.00118585	1.22903	0.000523228	1.22903	0.000551265	1.22903	-0.000108189	1.22903	3.633484456866398e-06	1.22903	0.000625614	1.22903	0.000473077	1.22903	-2.06e-05	1.22903	0.00012547	1.22903	0.000150421	1.22903	0.000123327	1.22903	0.00381274	1.22903	0.00392767	1.22903	0.000626714	1.22903	0.000644235
15325	740	E69Q/E70Q	355	$EP$3	76	1.24389	0.00223068	1.24389	0.00241629	1.24389	0.000392416	1.24389	0.00065931	1.24389	-0.00317646	1.24389	-0.0013924	1.24389	-0.00338968	1.24389	-0.00110658	1.24389	0.000458305	1.24389	0.000534876	1.24389	-0.000130066	1.24389	2.3259173043133075e-07	1.24389	0.000645992	1.24389	0.00046405	1.24389	-4.42e-05	1.24389	2.775788001637379e-05	1.24389	0.000135163	1.24389	0.00017191	1.24389	0.00388409	1.24389	0.00385713	1.24389	0.000675116	1.24389	0.00060542
15326	705	E69Q/E70Q	355	$ER$3	77	1.2597	0.0023529	1.2597	0.00247433	1.2597	0.000505474	1.2597	0.000672287	1.2597	-0.00313707	1.2597	-0.00144295	1.2597	-0.00343236	1.2597	-0.00124403	1.2597	0.000576969	1.2597	0.000542171	1.2597	-7.32e-05	1.2597	6.2321953346877734e-06	1.2597	0.000625372	1.2597	0.000457628	1.2597	0.000166737	1.2597	0.000135954	1.2597	0.000259189	1.2597	0.000216131	1.2597	0.00383702	1.2597	0.00377361	1.2597	0.000644961	1.2597	0.00054328
15327	740	E69Q/E70Q	355	$ET$3	78	1.2765	0.00235195	1.2765	0.00248459	1.2765	0.000590676	1.2765	0.000693082	1.2765	-0.00316619	1.2765	-0.00139461	1.2765	-0.00340645	1.2765	-0.00115478	1.2765	0.000507438	1.2765	0.000512877	1.2765	-7.54e-05	1.2765	5.624842378537664e-07	1.2765	0.000574434	1.2765	0.000398383	1.2765	0.000199422	1.2765	0.000150278	1.2765	0.000260417	1.2765	0.000238896	1.2765	0.0039795	1.2765	0.00381864	1.2765	0.000655375	1.2765	0.000556873
15328	705	R66Q	356	$EV$3	79	1.29436	0.00250731	1.29436	0.00248146	1.29436	0.000546333	1.29436	0.000748646	1.29436	-0.00311537	1.29436	-0.00141808	1.29436	-0.00343113	1.29436	-0.00125726	1.29436	0.000573279	1.29436	0.000455663	1.29436	-0.000170935	1.29436	-6.18e-05	1.29436	0.000705124	1.29436	0.000482273	1.29436	5.972669558309846e-05	1.29436	0.000132165	1.29436	0.000301896	1.29436	0.000203666	1.29436	0.00414937	1.29436	0.00383308	1.29436	0.000775184	1.29436	0.000580403
15329	740	R66Q	356	$EX$3	80	1.31335	0.00236421	1.31335	0.00238493	1.31335	0.000576066	1.31335	0.000690673	1.31335	-0.00311353	1.31335	-0.0014936	1.31335	-0.0034837	1.31335	-0.00128752	1.31335	0.000596557	1.31335	0.000529021	1.31335	-7.1e-05	1.31335	-8.13e-06	1.31335	0.000764451	1.31335	0.000441827	1.31335	0.000176493	1.31335	0.00014642	1.31335	0.000201237	1.31335	0.000157122	1.31335	0.00405083	1.31335	0.00386908	1.31335	0.000749645	1.31335	0.000621556
15330	705	R66Q	356	$EZ$3	81	1.33353	0.00249016	1.33353	0.00247976	1.33353	0.000691005	1.33353	0.000663662	1.33353	-0.00311291	1.33353	-0.00145283	1.33353	-0.00346242	1.33353	-0.00125472	1.33353	0.000636041	1.33353	0.000490598	1.33353	-7.04e-05	1.33353	1.0971615149846237e-05	1.33353	0.000739114	1.33353	0.000508273	1.33353	3.962442867192612e-05	1.33353	0.000148199	1.33353	0.000302016	1.33353	0.000192598	1.33353	0.00406412	1.33353	0.00383872	1.33353	0.000878551	1.33353	0.000549181
15331	740	R66Q	356	$FB$3	82	1.35499	0.0024843	1.35499	0.00236937	1.35499	0.000624909	1.35499	0.000695389	1.35499	-0.00318213	1.35499	-0.00147272	1.35499	-0.00345605	1.35499	-0.00123778	1.35499	0.00063982	1.35499	0.000548642	1.35499	-0.000155224	1.35499	-3.04e-05	1.35499	0.000704963	1.35499	0.000450769	1.35499	2.8940430831397336e-05	1.35499	8.57709242423274e-05	1.35499	0.000326415	1.35499	0.000220211	1.35499	0.00409835	1.35499	0.00385313	1.35499	0.000853047	1.35499	0.000571083
15332	705	R66Q	356	$FD$3	83	1.3778	0.00262415	1.3778	0.00244369	1.3778	0.000642921	1.3778	0.00063443	1.3778	-0.00304549	1.3778	-0.00139342	1.3778	-0.00329078	1.3778	-0.00120369	1.3778	0.000509472	1.3778	0.000489098	1.3778	-0.000158935	1.3778	-2.9e-05	1.3778	0.000710908	1.3778	0.000478057	1.3778	0.000114167	1.3778	0.000112573	1.3778	0.00028835	1.3778	0.000171184	1.3778	0.00421802	1.3778	0.00382071	1.3778	0.00098558	1.3778	0.000662646
15333	740	R66Q	356	$FF$3	84	1.40204	0.00247141	1.40204	0.00237429	1.40204	0.00058578	1.40204	0.000601422	1.40204	-0.00304213	1.40204	-0.0014322	1.40204	-0.00337904	1.40204	-0.00120152	1.40204	0.000588795	1.40204	0.000494554	1.40204	-2.79e-05	1.40204	1.4897483354592289e-05	1.40204	0.000757221	1.40204	0.000415697	1.40204	5.116771151716178e-05	1.40204	7.025120877526651e-05	1.40204	0.000220965	1.40204	0.000118882	1.40204	0.00423975	1.40204	0.00384096	1.40204	0.000823498	1.40204	0.000554942
15338	705	R66Q	356	$FH$3	85	1.42781	0.00251066	1.42781	0.00238732	1.42781	0.000714855	1.42781	0.000710571	1.42781	-0.00307393	1.42781	-0.00145092	1.42781	-0.00337699	1.42781	-0.00118521	1.42781	0.000668769	1.42781	0.000573228	1.42781	-8.08e-05	1.42781	-2.48e-05	1.42781	0.000747097	1.42781	0.000429282	1.42781	0.00013665	1.42781	0.000173159	1.42781	0.000181025	1.42781	0.000146568	1.42781	0.00420365	1.42781	0.00382484	1.42781	0.000975366	1.42781	0.00063727
15339	740	R66Q	356	$FJ$3	86	1.45521	0.00247518	1.45521	0.00236611	1.45521	0.000604298	1.45521	0.000623648	1.45521	-0.00316978	1.45521	-0.00149086	1.45521	-0.00334985	1.45521	-0.00122052	1.45521	0.00057266	1.45521	0.000552732	1.45521	2.628894048843644e-05	1.45521	1.807141279047686e-05	1.45521	0.000718705	1.45521	0.000451237	1.45521	0.00015889	1.45521	0.000125651	1.45521	0.00026138	1.45521	0.000150039	1.45521	0.00424726	1.45521	0.00377718	1.45521	0.000931073	1.45521	0.000603217
15342	705	R66Q	356	$FL$3	87	1.48433	0.00258331	1.48433	0.00245119	1.48433	0.000726455	1.48433	0.000684058	1.48433	-0.00308249	1.48433	-0.00148194	1.48433	-0.00327511	1.48433	-0.00121013	1.48433	0.000605194	1.48433	0.000523796	1.48433	-0.000154787	1.48433	-5.42e-05	1.48433	0.000672371	1.48433	0.000453668	1.48433	0.000151811	1.48433	0.000118751	1.48433	0.000260914	1.48433	0.000135809	1.48433	0.00429836	1.48433	0.00380316	1.48433	0.000941645	1.48433	0.000622859
15343	740	R66Q	356	$FN$3	88	1.51529	0.00269377	1.51529	0.0024968	1.51529	0.000713158	1.51529	0.000665101	1.51529	-0.00301067	1.51529	-0.00139983	1.51529	-0.00340086	1.51529	-0.00121066	1.51529	0.00067257	1.51529	0.000522244	1.51529	-8.34e-05	1.51529	-2.51e-05	1.51529	0.000690758	1.51529	0.000494311	1.51529	7.594133390724078e-05	1.51529	4.0427726898568245e-05	1.51529	0.000402504	1.51529	0.000242781	1.51529	0.00419814	1.51529	0.00378782	1.51529	0.000819374	1.51529	0.000555123
15344	705	R66Q	356	$FP$3	89	1.5482	0.00261814	1.5482	0.00244465	1.5482	0.000671626	1.5482	0.000715161	1.5482	-0.00312812	1.5482	-0.00149371	1.5482	-0.00344517	1.5482	-0.00128601	1.5482	0.000581425	1.5482	0.000487986	1.5482	-6.88e-05	1.5482	-1.77e-05	1.5482	0.000758338	1.5482	0.000474486	1.5482	0.000148046	1.5482	0.000103395	1.5482	0.000220562	1.5482	0.000174785	1.5482	0.00421809	1.5482	0.00376345	1.5482	0.000850072	1.5482	0.000581658
15345	740	R66Q	356	$FR$3	90	1.58319	0.00264564	1.58319	0.0023874	1.58319	0.000658985	1.58319	0.000674271	1.58319	-0.00305473	1.58319	-0.00142095	1.58319	-0.00338418	1.58319	-0.00117619	1.58319	0.000729379	1.58319	0.000558562	1.58319	0.000111478	1.58319	8.089501040886571e-05	1.58319	0.000676028	1.58319	0.000396831	1.58319	0.000143915	1.58319	0.000110016	1.58319	0.000210946	1.58319	0.000180602	1.58319	0.00424129	1.58319	0.00381372	1.58319	0.000984354	1.58319	0.000609401
15346	705	R66Q	356	$FT$3	91	1.62038	0.00263821	1.62038	0.00239038	1.62038	0.000718189	1.62038	0.000671491	1.62038	-0.00303943	1.62038	-0.00144807	1.62038	-0.0033939	1.62038	-0.0012358	1.62038	0.000620643	1.62038	0.00047561	1.62038	-0.000390314	1.62038	-0.000232918	1.62038	0.000724216	1.62038	0.000459052	1.62038	0.00015945	1.62038	0.000157118	1.62038	0.000334934	1.62038	0.000226241	1.62038	0.0041742	1.62038	0.00374149	1.62038	0.000893026	1.62038	0.00061313
15347	740	R66Q	356	$FV$3	92	1.65991	0.00263489	1.65991	0.00239017	1.65991	0.000803053	1.65991	0.000684827	1.65991	-0.00311903	1.65991	-0.00151517	1.65991	-0.00332178	1.65991	-0.00125329	1.65991	0.000592373	1.65991	0.000459279	1.65991	5.342332532361216e-06	1.65991	4.6700930007026464e-06	1.65991	0.000781298	1.65991	0.000544814	1.65991	3.843004724389423e-05	1.65991	9.268594935877422e-05	1.65991	0.000287022	1.65991	0.000188507	1.65991	0.00409857	1.65991	0.00368355	1.65991	0.000839344	1.65991	0.000501767
15348	705	R66Q	356	$FX$3	93	1.70194	0.00252442	1.70194	0.00231689	1.70194	0.000734692	1.70194	0.000665572	1.70194	-0.00311479	1.70194	-0.00150327	1.70194	-0.00341467	1.70194	-0.00121704	1.70194	0.000684006	1.70194	0.000536178	1.70194	0.00016999	1.70194	4.5128237059210985e-05	1.70194	0.000754398	1.70194	0.000516411	1.70194	0.000133308	1.70194	0.000178308	1.70194	0.000300505	1.70194	0.000243764	1.70194	0.00419117	1.70194	0.00365235	1.70194	0.00101446	1.70194	0.000563562
15349	740	R66Q	356	$FZ$3	94	1.74661	0.00252532	1.74661	0.00235634	1.74661	0.00066889	1.74661	0.000631614	1.74661	-0.00311258	1.74661	-0.00144675	1.74661	-0.0033004	1.74661	-0.00120143	1.74661	0.00057107	1.74661	0.000446908	1.74661	-5.42e-05	1.74661	-1.38e-05	1.74661	0.000706022	1.74661	0.000446315	1.74661	0.000201516	1.74661	0.000154876	1.74661	0.000367643	1.74661	0.000221165	1.74661	0.00405849	1.74661	0.00362256	1.74661	0.000896853	1.74661	0.000571041
15350	705	R66Q	356	$GB$3	95	1.7941	0.00247197	1.7941	0.00233328	1.7941	0.000787866	1.7941	0.000654596	1.7941	-0.00315543	1.7941	-0.00146867	1.7941	-0.00341602	1.7941	-0.0012234	1.7941	0.000634522	1.7941	0.000486687	1.7941	2.1097581624753003e-05	1.7941	2.449098138412875e-05	1.7941	0.000796049	1.7941	0.000515716	1.7941	7.707847587150513e-05	1.7941	9.39099359425332e-05	1.7941	0.000337315	1.7941	0.000189708	1.7941	0.00420963	1.7941	0.00374813	1.7941	0.000926101	1.7941	0.000585272
15351	740	R66Q	356	$GD$3	96	1.84458	0.00263201	1.84458	0.0023506	1.84458	0.000690834	1.84458	0.000612987	1.84458	-0.00302452	1.84458	-0.00142508	1.84458	-0.00341142	1.84458	-0.0012957	1.84458	0.000639846	1.84458	0.000531493	1.84458	-3.55e-05	1.84458	-3.17e-05	1.84458	0.000777439	1.84458	0.000534742	1.84458	2.414992519601095e-05	1.84458	8.049009293309255e-05	1.84458	0.000298158	1.84458	0.000222205	1.84458	0.00418043	1.84458	0.00369492	1.84458	0.000924718	1.84458	0.000630975
15704	705	WT	364	$GF$3	97	1.89825	0.00259383	1.89825	0.00234021	1.89825	0.000779166	1.89825	0.000657477	1.89825	-0.00304346	1.89825	-0.00146455	1.89825	-0.00339758	1.89825	-0.0012319	1.89825	0.000632035	1.89825	0.000554446	1.89825	-4.34e-05	1.89825	-7.18e-06	1.89825	0.000706348	1.89825	0.000464288	1.89825	0.000112926	1.89825	0.000134317	1.89825	0.000349585	1.89825	0.000144319	1.89825	0.00403303	1.89825	0.00363538	1.89825	0.00093575	1.89825	0.000649495
15705	740	WT	364	$GH$3	98	1.9553	0.00257867	1.9553	0.00235534	1.9553	0.000729556	1.9553	0.000683625	1.9553	-0.00318248	1.9553	-0.00146573	1.9553	-0.0034604	1.9553	-0.00129105	1.9553	0.000645405	1.9553	0.000494601	1.9553	-7.53e-05	1.9553	5.925025385322691e-07	1.9553	0.00073738	1.9553	0.000462823	1.9553	6.328140108101204e-05	1.9553	0.000138971	1.9553	0.000358612	1.9553	0.00021552	1.9553	0.00409842	1.9553	0.00365833	1.9553	0.000885557	1.9553	0.000567373
15706	705	WT	364	$GJ$3	99	2.01594	0.00256998	2.01594	0.00231825	2.01594	0.00076863	2.01594	0.000682653	2.01594	-0.00305512	2.01594	-0.00144338	2.01594	-0.00341193	2.01594	-0.00130236	2.01594	0.000627895	2.01594	0.000527091	2.01594	-0.000108905	2.01594	-4.07e-05	2.01594	0.000662123	2.01594	0.00045379	2.01594	0.000135442	2.01594	0.000113139	2.01594	0.000294461	2.01594	0.000218974	2.01594	0.00413683	2.01594	0.00368551	2.01594	0.000989929	2.01594	0.000589319
15707	740	WT	364	$GL$3	100	2.0804	0.00245421	2.0804	0.00231655	2.0804	0.00075236	2.0804	0.000592716	2.0804	-0.00305709	2.0804	-0.00148215	2.0804	-0.00337426	2.0804	-0.00124635	2.0804	0.000653165	2.0804	0.000527872	2.0804	-0.00010207	2.0804	-4.74e-05	2.0804	0.00064426	2.0804	0.000447157	2.0804	0.000122571	2.0804	0.000188465	2.0804	0.000208386	2.0804	0.00014786	2.0804	0.00413356	2.0804	0.00369187	2.0804	0.000961602	2.0804	0.000576446
15708	705	WT	364	$GN$3	101	2.14893	0.00244731	2.14893	0.0023061	2.14893	0.000682922	2.14893	0.000675735	2.14893	-0.00317885	2.14893	-0.00148734	2.14893	-0.00343967	2.14893	-0.00129209	2.14893	0.00052294	2.14893	0.000410232	2.14893	-3.12e-05	2.14893	-1.51e-05	2.14893	0.000693612	2.14893	0.000474645	2.14893	0.000121052	2.14893	0.000154681	2.14893	0.000321776	2.14893	0.00025337	2.14893	0.00394536	2.14893	0.00362536	2.14893	0.000813569	2.14893	0.000518912
15709	740	WT	364	$GP$3	102	2.22177	0.00256382	2.22177	0.00237718	2.22177	0.000753601	2.22177	0.000678497	2.22177	-0.00303814	2.22177	-0.00149817	2.22177	-0.00342351	2.22177	-0.00122605	2.22177	0.000674242	2.22177	0.000514072	2.22177	-9.23e-05	2.22177	-3.04e-05	2.22177	0.000633619	2.22177	0.000462609	2.22177	8.640839716399142e-06	2.22177	0.000104908	2.22177	0.000302339	2.22177	0.000234503	2.22177	0.00397259	2.22177	0.00356045	2.22177	0.000896862	2.22177	0.000571047
15710	705	WT	364	$GR$3	103	2.29921	0.00249926	2.29921	0.00232378	2.29921	0.000710363	2.29921	0.000621881	2.29921	-0.00309982	2.29921	-0.00145192	2.29921	-0.00337815	2.29921	-0.00119312	2.29921	0.000723552	2.29921	0.000547427	2.29921	-6.14e-05	2.29921	-2.47e-05	2.29921	0.000725594	2.29921	0.000479896	2.29921	0.000118744	2.29921	0.000205721	2.29921	0.000247176	2.29921	0.00014287	2.29921	0.00390268	2.29921	0.00351416	2.29921	0.000923284	2.29921	0.000618939
15711	740	WT	364	$GT$3	104	2.38153	0.00245677	2.38153	0.00222489	2.38153	0.000606971	2.38153	0.000597909	2.38153	-0.00311965	2.38153	-0.00147425	2.38153	-0.0033884	2.38153	-0.00125629	2.38153	0.000615607	2.38153	0.0005741	2.38153	-5.03e-05	2.38153	2.5261778725194084e-05	2.38153	0.000679972	2.38153	0.000483054	2.38153	9.052311537086923e-05	2.38153	0.000132156	2.38153	0.000310029	2.38153	0.000225122	2.38153	0.0039543	2.38153	0.00351479	2.38153	0.000821516	2.38153	0.000603747
15712	705	WT	364	$GV$3	105	2.46903	0.00240193	2.46903	0.00223056	2.46903	0.000603817	2.46903	0.000544088	2.46903	-0.00313557	2.46903	-0.00148264	2.46903	-0.00347978	2.46903	-0.00127896	2.46903	0.000648591	2.46903	0.000498518	2.46903	2.382023517530363e-06	2.46903	2.453207128511048e-05	2.46903	0.000568485	2.46903	0.000424711	2.46903	0.000175609	2.46903	0.000160883	2.46903	0.000286035	2.46903	0.00025028	2.46903	0.00397537	2.46903	0.00353552	2.46903	0.000875739	2.46903	0.000616114
15713	740	WT	364	$GX$3	106	2.56205	0.00242455	2.56205	0.00229773	2.56205	0.000749854	2.56205	0.000648563	2.56205	-0.00307951	2.56205	-0.00147235	2.56205	-0.00351898	2.56205	-0.00130574	2.56205	0.0006696	2.56205	0.000572997	2.56205	-1.69e-05	2.56205	8.266786409527604e-06	2.56205	0.000742179	2.56205	0.000546479	2.56205	0.000174141	2.56205	0.000187257	2.56205	0.000270093	2.56205	0.000157336	2.56205	0.00395851	2.56205	0.00350562	2.56205	0.000936277	2.56205	0.000603965
15714	705	WT	364	$GZ$3	107	2.66093	0.00243066	2.66093	0.00223867	2.66093	0.000704185	2.66093	0.00069372	2.66093	-0.00313104	2.66093	-0.00149405	2.66093	-0.00351446	2.66093	-0.00132427	2.66093	0.000571667	2.66093	0.000529832	2.66093	9.858654683662926e-06	2.66093	-3.65e-05	2.66093	0.000737763	2.66093	0.000490295	2.66093	5.36877793195958e-05	2.66093	0.000112196	2.66093	0.000339205	2.66093	0.000202238	2.66093	0.00394826	2.66093	0.00347171	2.66093	0.00089374	2.66093	0.000609625
15715	740	WT	364	$HB$3	108	2.76605	0.00243625	2.76605	0.00220987	2.76605	0.000673538	2.76605	0.000573269	2.76605	-0.003197	2.76605	-0.00150339	2.76605	-0.00345114	2.76605	-0.00130338	2.76605	0.000507139	2.76605	0.000469343	2.76605	-0.000106232	2.76605	-2.18e-05	2.76605	0.00071053	2.76605	0.00050268	2.76605	6.441577598461506e-07	2.76605	5.448573677968235e-05	2.76605	0.000275166	2.76605	0.000151803	2.76605	0.00391467	2.76605	0.0034592	2.76605	0.000823975	2.76605	0.000557148
15716	705	WT	364	$HD$3	109	2.87779	0.00239488	2.87779	0.00221214	2.87779	0.000642465	2.87779	0.000631231	2.87779	-0.00308199	2.87779	-0.00149898	2.87779	-0.00355586	2.87779	-0.00134352	2.87779	0.000610757	2.87779	0.000582201	2.87779	-4.5e-05	2.87779	1.4017947023770017e-05	2.87779	0.00061932	2.87779	0.000492509	2.87779	8.081947706773274e-05	2.87779	0.000112118	2.87779	0.000323839	2.87779	0.000244934	2.87779	0.00385322	2.87779	0.00340956	2.87779	0.000878415	2.87779	0.000606358
15717	740	WT	364	$HF$3	110	2.99657	0.00230267	2.99657	0.00214686	2.99657	0.000718726	2.99657	0.000652269	2.99657	-0.00311829	2.99657	-0.00147868	2.99657	-0.00347514	2.99657	-0.00127331	2.99657	0.000655839	2.99657	0.000530616	2.99657	4.998816305160081e-05	2.99657	6.889501104945239e-06	2.99657	0.000641677	2.99657	0.000529031	2.99657	0.000158685	2.99657	0.000195686	2.99657	0.000313848	2.99657	0.000209461	2.99657	0.00378102	2.99657	0.00333791	2.99657	0.000882721	2.99657	0.000607085
15718	705	WT	364	$HH$3	111	3.12284	0.00233592	3.12284	0.00213043	3.12284	0.000664775	3.12284	0.000656539	3.12284	-0.00317536	3.12284	-0.00151382	3.12284	-0.00357726	3.12284	-0.0013291	3.12284	0.000613574	3.12284	0.00050954	3.12284	-7.37e-05	3.12284	-3.09e-06	3.12284	0.000706545	3.12284	0.000511126	3.12284	8.756015873141254e-05	3.12284	0.000163371	3.12284	0.000324441	3.12284	0.000187482	3.12284	0.00375811	3.12284	0.00331153	3.12284	0.000745167	3.12284	0.00047186
15719	740	WT	364	$HJ$3	112	3.25707	0.00231438	3.25707	0.00220517	3.25707	0.000621131	3.25707	0.000598806	3.25707	-0.00315497	3.25707	-0.00155064	3.25707	-0.00349212	3.25707	-0.00127338	3.25707	0.000523287	3.25707	0.000489827	3.25707	8.812504539899846e-06	3.25707	4.132009149937499e-05	3.25707	0.000692471	3.25707	0.000533265	3.25707	9.736469513664959e-05	3.25707	0.000149872	3.25707	0.000275279	3.25707	0.000102327	3.25707	0.00378892	3.25707	0.00326362	3.25707	0.000865856	3.25707	0.000601511
15720	705	WT	364	$HL$3	113	3.39975	0.00223608	3.39975	0.00208757	3.39975	0.000536897	3.39975	0.000544734	3.39975	-0.00222374	3.39975	-0.00123891	3.39975	-0.00361947	3.39975	-0.00137298	3.39975	0.0006302	3.39975	0.000508944	3.39975	-2.04e-05	3.39975	5.407486219799473e-06	3.39975	0.000697253	3.39975	0.000536496	3.39975	0.000112881	3.39975	0.00015689	3.39975	0.000220844	3.39975	0.000179645	3.39975	0.00355825	3.39975	0.00319068	3.39975	0.000894965	3.39975	0.000612389
15721	740	WT	364	$HN$3	114	3.55143	0.00222077	3.55143	0.00213386	3.55143	0.000640307	3.55143	0.000598089	3.55143	-0.00122539	3.55143	-0.000714721	3.55143	-0.00361814	3.55143	-0.00135586	3.55143	0.000601238	3.55143	0.000529751	3.55143	-6.32e-05	3.55143	1.7114223284542263e-05	3.55143	0.000621516	3.55143	0.000479928	3.55143	0.000127187	3.55143	0.000124215	3.55143	0.000158958	3.55143	0.000149893	3.55143	0.00359549	3.55143	0.00322374	3.55143	0.000827154	3.55143	0.00052231
15618	705	E71Q	360	$HP$3	115	3.71267	0.00216863	3.71267	0.00204961	3.71267	0.000667283	3.71267	0.000649275	3.71267	-0.000829942	3.71267	-0.000403529	3.71267	-0.00363375	3.71267	-0.00138084	3.71267	0.000558816	3.71267	0.000539858	3.71267	6.124842994646024e-05	3.71267	-1.3e-05	3.71267	0.000692121	3.71267	0.000524388	3.71267	4.717020739740548e-05	3.71267	0.000164753	3.71267	0.000307641	3.71267	0.000197582	3.71267	0.00352423	3.71267	0.00312825	3.71267	0.000778536	3.71267	0.000573447
15619	740	E71Q	360	$HR$3	116	3.88407	0.00219538	3.88407	0.00198398	3.88407	0.000679293	3.88407	0.000631509	3.88407	-0.000722079	3.88407	-0.000359448	3.88407	-0.00352673	3.88407	-0.00132649	3.88407	0.00058164	3.88407	0.000536018	3.88407	4.0354902934296166e-05	3.88407	4.143240266307746e-05	3.88407	0.000715947	3.88407	0.000540021	3.88407	0.000183003	3.88407	0.000197606	3.88407	0.000216222	3.88407	0.000187347	3.88407	0.00351907	3.88407	0.00312723	3.88407	0.000808488	3.88407	0.000583598
15620	705	E71Q	360	$HT$3	117	4.06627	0.00205043	4.06627	0.0020301	4.06627	0.000593367	4.06627	0.000550895	4.06627	-0.000685851	4.06627	-0.000346746	4.06627	-0.00346919	4.06627	-0.00126395	4.06627	0.000593754	4.06627	0.000585524	4.06627	1.974864155269984e-05	4.06627	3.277970947157538e-05	4.06627	0.000635911	4.06627	0.000534549	4.06627	5.0836721243178095e-05	4.06627	0.000130848	4.06627	0.000255023	4.06627	0.000219659	4.06627	0.00341311	4.06627	0.00302481	4.06627	0.000817963	4.06627	0.000556961
15621	740	E71Q	360	$HV$3	118	4.25996	0.00215693	4.25996	0.00203447	4.25996	0.000569829	4.25996	0.000567248	4.25996	-0.000622535	4.25996	-0.000299151	4.25996	-0.00353623	4.25996	-0.00137735	4.25996	0.000565973	4.25996	0.000503491	4.25996	2.3520413715713562e-05	4.25996	4.526675801519442e-05	4.25996	0.000740356	4.25996	0.000614798	4.25996	6.429605223462085e-05	4.25996	0.000126688	4.25996	0.000295094	4.25996	0.000146045	4.25996	0.00337033	4.25996	0.00298141	4.25996	0.000803058	4.25996	0.000597086
15622	705	E71Q	360	$HX$3	119	4.46585	0.00214856	4.46585	0.00201589	4.46585	0.000593729	4.46585	0.000492809	4.46585	-0.000646516	4.46585	-0.000267743	4.46585	-0.00362471	4.46585	-0.00141919	4.46585	0.000594692	4.46585	0.000495434	4.46585	4.853993897920017e-05	4.46585	3.7113859938431304e-05	4.46585	0.000768182	4.46585	0.000563645	4.46585	2.8624529522387624e-05	4.46585	0.000122711	4.46585	0.000299813	4.46585	0.000169467	4.46585	0.00329958	4.46585	0.00295549	4.46585	0.000661922	4.46585	0.000480772
15623	740	E71Q	360	$HZ$3	120	4.68472	0.0020592	4.68472	0.00194854	4.68472	0.00070486	4.68472	0.000592307	4.68472	-0.000685501	4.68472	-0.000334103	4.68472	-0.00351186	4.68472	-0.00134128	4.68472	0.000506184	4.68472	0.000502587	4.68472	0.000127274	4.68472	4.544936317585346e-05	4.68472	0.000766029	4.68472	0.000548528	4.68472	0.000103345	4.68472	9.573474924283974e-05	4.68472	0.000352306	4.68472	0.000228244	4.68472	0.00315407	4.68472	0.00282711	4.68472	0.000789739	4.68472	0.000570403
15624	705	E71Q	360	$IB$3	121	4.91738	0.00203466	4.91738	0.00193049	4.91738	0.000642612	4.91738	0.000613784	4.91738	-0.000598795	4.91738	-0.00022794	4.91738	-0.00370392	4.91738	-0.00142807	4.91738	0.000551203	4.91738	0.000504878	4.91738	-4.37e-05	4.91738	6.689151338779009e-06	4.91738	0.000710775	4.91738	0.00056625	4.91738	2.8003670364499123e-06	4.91738	7.902123290430378e-05	4.91738	0.000235963	4.91738	0.000162116	4.91738	0.00317923	4.91738	0.00283092	4.91738	0.000820891	4.91738	0.000527923
15625	740	E71Q	360	$ID$3	122	5.16471	0.00195491	5.16471	0.00183346	5.16471	0.000605933	5.16471	0.000581162	5.16471	-0.000624548	5.16471	-0.000312621	5.16471	-0.00368457	5.16471	-0.00145674	5.16471	0.000577641	5.16471	0.000520339	5.16471	3.777985180516974e-05	5.16471	5.554306240102003e-05	5.16471	0.000734069	5.16471	0.00060489	5.16471	0.000142039	5.16471	0.000141171	5.16471	0.000225317	5.16471	0.000207815	5.16471	0.00309081	5.16471	0.002718	5.16471	0.000848285	5.16471	0.000582734
15626	705	E71Q	360	$IF$3	123	5.42763	0.00195094	5.42763	0.00183145	5.42763	0.000589298	5.42763	0.000585695	5.42763	-0.000670705	5.42763	-0.000309451	5.42763	-0.00357369	5.42763	-0.00142173	5.42763	0.000556017	5.42763	0.000538171	5.42763	2.983863020649541e-05	5.42763	5.031035495101088e-05	5.42763	0.000753732	5.42763	0.000566721	5.42763	5.1466313724789865e-05	5.42763	8.604880257459535e-05	5.42763	0.000282583	5.42763	0.000210181	5.42763	0.00302387	5.42763	0.00263968	5.42763	0.000761498	5.42763	0.000576381
15627	740	E71Q	360	$IH$3	124	5.70711	0.00179557	5.70711	0.00169906	5.70711	0.000650902	5.70711	0.000485159	5.70711	-0.000610232	5.70711	-0.000323777	5.70711	-0.00360194	5.70711	-0.00146243	5.70711	0.000565199	5.70711	0.000532898	5.70711	0.000112598	5.70711	8.73083875297942e-05	5.70711	0.000685554	5.70711	0.00053225	5.70711	6.15348913671637e-05	5.70711	0.000154323	5.70711	0.000339626	5.70711	0.00023385	5.70711	0.00302283	5.70711	0.00267767	5.70711	0.000810865	5.70711	0.000579495
15628	705	E71Q	360	$IJ$3	125	6.00421	0.00180591	6.00421	0.00171821	6.00421	0.000605994	6.00421	0.000518434	6.00421	-0.000475821	6.00421	-0.000233031	6.00421	-0.00376518	6.00421	-0.00147014	6.00421	0.000588994	6.00421	0.000556248	6.00421	0.000110368	6.00421	6.770749579187996e-05	6.00421	0.000665095	6.00421	0.000578613	6.00421	0.000147528	6.00421	0.000202648	6.00421	0.000292804	6.00421	0.000126333	6.00421	0.00289211	6.00421	0.00258224	6.00421	0.000770199	6.00421	0.000545003
15629	740	E71Q	360	$IL$3	126	16.0544	0.000399825	16.0544	0.000261252	16.0544	0.0003049	16.0544	0.000252404	16.0544	0.000234101	16.0544	0.00021208	16.0544	0.000180525	16.0544	0.000133298	16.0544	0.00027813	16.0544	0.000225474	16.0544	0.000238633	16.0544	0.000124967	16.0544	0.000290985	16.0544	0.000234841	16.0544	0.00028079	16.0544	0.000204025	16.0544	0.000221285	16.0544	0.000239458	16.0544	0.00032678	16.0544	0.00032986	16.0544	0.000211846	16.0544	0.000175848
15630	705	E71Q	360	$IN$3	127	16.1046	0.000235502	16.1046	0.000245089	16.1046	0.000150864	16.1046	0.000135465	16.1046	0.00017495	16.1046	0.000122796	16.1046	0.000250807	16.1046	0.000209163	16.1046	0.000254545	16.1046	0.000148378	16.1046	0.000124105	16.1046	7.342281051875288e-05	16.1046	0.000149998	16.1046	0.000149569	16.1046	0.000143909	16.1046	0.000181465	16.1046	0.000112567	16.1046	0.000106354	16.1046	0.000339032	16.1046	0.00030285	16.1046	0.000188732	16.1046	0.000146918
15631	740	E71Q	360	$IP$3	128	16.1548	0.000196432	16.1548	0.00018259	16.1548	0.000135577	16.1548	0.000119909	16.1548	4.326252183294195e-05	16.1548	7.383221920576923e-05	16.1548	0.000145661	16.1548	0.000100045	16.1548	3.837502478381931e-05	16.1548	6.285402203870527e-05	16.1548	0.000132158	16.1548	5.963762157956687e-05	16.1548	0.000174821	16.1548	0.000108925	16.1548	0.000175854	16.1548	0.000105832	16.1548	6.059445933859729e-05	16.1548	5.724532197863737e-05	16.1548	0.00021692	16.1548	0.000213177	16.1548	5.699247761560512e-05	16.1548	0.000100598
15632	705	E71Q	360	$IR$3	129	16.205	3.803591583178591e-05	16.205	0.000101112	16.205	3.351796766509589e-05	16.205	3.3789617840351144e-05	16.205	0.000134236	16.205	0.000113994	16.205	0.000124812	16.205	8.835225514752625e-05	16.205	5.358516023765722e-05	16.205	7.7142489299813e-05	16.205	2.53092496937668e-05	16.205	1.9173143746109567e-05	16.205	6.341757295999441e-05	16.205	6.246723401497761e-05	16.205	9.029103911090998e-05	16.205	8.438584888946499e-05	16.205	3.673628420196827e-05	16.205	2.4029402213339088e-05	16.205	4.2658477952410394e-05	16.205	3.922702005468119e-05	16.205	5.616622933777649e-05	16.205	0.000101079
15633	740	E71Q	360	$IT$3	130	16.2552	0.0001348	16.2552	5.070333133901615e-05	16.2552	-8.62e-06	16.2552	3.42273030224903e-05	16.2552	6.26848842360246e-05	16.2552	0.000105136	16.2552	3.385696885857656e-05	16.2552	1.4848027001544695e-05	16.2552	6.61912261104877e-05	16.2552	4.4497502670881595e-05	16.2552	0.000118789	16.2552	5.92222120196495e-05	16.2552	1.7141203230834536e-05	16.2552	5.232940599320286e-05	16.2552	9.786629657776826e-05	16.2552	5.786759283245464e-05	16.2552	0.000125042	16.2552	0.000102393	16.2552	0.000184215	16.2552	0.000108268	16.2552	3.0209274900399544e-05	16.2552	5.248716221496405e-05
15634	705	E71Q	360	$IV$3	131	16.3054	-3.68e-06	16.3054	7.266449683672807e-06	16.3054	2.3208661143644862e-05	16.3054	7.570408047523e-05	16.3054	6.95737980343494e-06	16.3054	3.3554798208153096e-05	16.3054	8.451738123184242e-05	16.3054	2.9057743698377922e-05	16.3054	2.6880870996419913e-05	16.3054	6.266526119817067e-05	16.3054	3.8594209329743945e-05	16.3054	2.073643465605457e-05	16.3054	-8.28e-05	16.3054	-7.65e-05	16.3054	-4.15e-06	16.3054	1.2290960118671937e-05	16.3054	5.8866813450178176e-05	16.3054	2.7330589815787246e-05	16.3054	9.489398317195398e-05	16.3054	6.642654074623389e-05	16.3054	5.543751785403047e-05	16.3054	6.37879295303373e-05
15635	740	E71Q	360	$IX$3	132	16.3556	6.533665372579316e-05	16.3556	5.241190061121455e-05	16.3556	-4.42e-05	16.3556	1.64993381755376e-05	16.3556	3.362085507610394e-05	16.3556	3.422775165740858e-05	16.3556	-2.36e-05	16.3556	8.98406388727055e-06	16.3556	-3.53e-05	16.3556	-1.62e-06	16.3556	1.3405254918219534e-05	16.3556	-1.38e-05	16.3556	4.3641554095916364e-05	16.3556	2.7485273218679288e-05	16.3556	-3.45e-05	16.3556	1.855897473461085e-05	16.3556	7.51202279181476e-07	16.3556	-1.4e-05	16.3556	-7.16e-06	16.3556	3.787187305318192e-05	16.3556	4.703636197780263e-05	16.3556	2.268392198719396e-06
15638	705	E70Q	361	$IZ$3	133	16.4058	-1.51e-05	16.4058	3.074372348627931e-05	16.4058	-5.96e-06	16.4058	2.6779653149842583e-05	16.4058	-2.78e-05	16.4058	-3.32e-05	16.4058	-2.31e-07	16.4058	4.262417648835323e-06	16.4058	1.4661479154117873e-06	16.4058	-3.39e-05	16.4058	5.323447267197717e-05	16.4058	2.315266814856276e-05	16.4058	5.1379083667250046e-05	16.4058	4.476219976679019e-05	16.4058	-6.25e-05	16.4058	-6.96e-05	16.4058	-2.52e-06	16.4058	-2.57e-05	16.4058	3.6086636410868726e-05	16.4058	-4.76e-06	16.4058	-1.39e-05	16.4058	6.970168072245597e-06
15639	740	E70Q	361	$JB$3	134	16.456	-3.78e-05	16.456	-7.71e-05	16.456	1.618275150876017e-05	16.456	3.4066429575266982e-06	16.456	6.318276098594977e-05	16.456	-3.68e-06	16.456	-0.000107596	16.456	-6.47e-05	16.456	-2.21e-05	16.456	-5.54e-05	16.456	-4.51e-05	16.456	-3.04e-05	16.456	3.73173519829463e-05	16.456	3.734516783543938e-05	16.456	-2.77e-05	16.456	-2.75e-05	16.456	1.3843271934397237e-05	16.456	-2.99e-05	16.456	1.4100585166668123e-05	16.456	4.355481288813648e-06	16.456	-4.51e-05	16.456	-3.54e-05
15640	705	E70Q	361	$JD$3	135	16.5062	-5.64e-05	16.5062	-3.5e-05	16.5062	2.6494039022414376e-05	16.5062	-7.84e-06	16.5062	-1.05e-06	16.5062	1.1479912884909162e-05	16.5062	-2.97e-05	16.5062	-2.19e-05	16.5062	-8.31e-05	16.5062	-9.69e-05	16.5062	-2.17e-05	16.5062	-5.77e-06	16.5062	-6.49e-05	16.5062	-4.14e-05	16.5062	2.2672210467729673e-05	16.5062	1.0424978553769462e-05	16.5062	-2.07e-05	16.5062	-1.25e-05	16.5062	1.953845409658015e-05	16.5062	7.845833065929855e-06	16.5062	-4.56e-05	16.5062	-5.31e-05
15641	740	E70Q	361	$JF$3	136	16.5564	-1.03e-05	16.5564	-3.55e-05	16.5564	-4.29e-05	16.5564	-6.39e-05	16.5564	-4.27e-05	16.5564	-4.61e-05	16.5564	-0.000148951	16.5564	-6.54e-05	16.5564	-5.2e-05	16.5564	-6.03e-05	16.5564	-0.000124322	16.5564	-5.17e-05	16.5564	-5e-05	16.5564	-3.45e-05	16.5564	8.207955220265392e-06	16.5564	-1.88e-05	16.5564	-1.82e-05	16.5564	-1.5e-05	16.5564	-5.97e-05	16.5564	-2.18e-05	16.5564	-4.28e-05	16.5564	-3.76e-05
15642	705	E70Q	361	$JH$3	137	16.6066	-4.27e-05	16.6066	-2.61e-05	16.6066	6.463651348690303e-05	16.6066	-2.98e-06	16.6066	-2.23e-05	16.6066	-1.31e-05	16.6066	-1.74e-05	16.6066	-1.76e-05	16.6066	-9.57e-05	16.6066	-4.51e-05	16.6066	-4.48e-05	16.6066	1.0397408641837913e-05	16.6066	1.6411551164800245e-05	16.6066	4.307594641674711e-06	16.6066	-1.98e-05	16.6066	2.7741045242609536e-05	16.6066	-5.27e-05	16.6066	8.486737772626235e-07	16.6066	-0.000104137	16.6066	-9.24e-05	16.6066	-5.29e-05	16.6066	-2.96e-05
15643	740	E70Q	361	$JJ$3	138	16.6569	3.168640946314867e-05	16.6569	-9.35e-05	16.6569	-0.000140923	16.6569	-4.75e-05	16.6569	-0.000155748	16.6569	-8.04e-05	16.6569	-0.000108459	16.6569	-0.000127263	16.6569	-0.000112745	16.6569	-1.58e-05	16.6569	-9.11e-05	16.6569	-2.5e-05	16.6569	-8.57e-05	16.6569	-9.34e-05	16.6569	-6.24e-05	16.6569	-5.46e-05	16.6569	-6.33e-05	16.6569	-1.94e-05	16.6569	-4.74e-05	16.6569	-6.03e-05	16.6569	-3.35e-06	16.6569	-1.41e-05
15646	705	E70Q	361	$JL$3	139	16.7071	-1.86e-05	16.7071	-1.08e-05	16.7071	-3.07e-05	16.7071	-5.42e-05	16.7071	-3.86e-05	16.7071	-4.02e-05	16.7071	6.765491740359222e-05	16.7071	2.623099393953346e-05	16.7071	-2.4e-05	16.7071	-7.69e-06	16.7071	-2.22e-05	16.7071	-2.71e-05	16.7071	-0.000117781	16.7071	-0.000115833	16.7071	-1.97e-05	16.7071	-4.38e-05	16.7071	-8.23e-05	16.7071	-9.12e-05	16.7071	-0.000174813	16.7071	-0.000141289	16.7071	-2.74e-05	16.7071	-4.99e-05
15647	740	E70Q	361	$JN$3	140	16.7573	-0.000120202	16.7573	-0.000114866	16.7573	-3.39e-05	16.7573	-1.49e-05	16.7573	-0.000120834	16.7573	-0.000110448	16.7573	-7.08e-05	16.7573	-3.04e-05	16.7573	-7.18e-07	16.7573	9.392428608012357e-06	16.7573	3.015452206178021e-05	16.7573	2.5929052617224002e-06	16.7573	4.994978797018181e-07	16.7573	5.252975209804264e-06	16.7573	-0.000122198	16.7573	-7.95e-05	16.7573	-2.75e-05	16.7573	-1.7e-05	16.7573	-6.55e-05	16.7573	-6.14e-05	16.7573	-8.62e-06	16.7573	-4.93e-05
15648	705	E70Q	361	$JP$3	141	16.8075	-4.3e-05	16.8075	-2.13e-05	16.8075	2.0415396488825902e-05	16.8075	-9.2e-05	16.8075	-3.63e-05	16.8075	-9.37e-05	16.8075	-6.79e-05	16.8075	-1.99e-05	16.8075	-2.56e-05	16.8075	-4.04e-05	16.8075	3.2888553676835297e-06	16.8075	-4.8e-05	16.8075	4.241910646567365e-06	16.8075	-3.16e-05	16.8075	-8.45e-05	16.8075	-9.19e-05	16.8075	2.481473380250114e-05	16.8075	-1.69e-05	16.8075	-0.000146353	16.8075	-0.000156406	16.8075	-6.66e-05	16.8075	-8.12e-05
15649	740	E70Q	361	$JR$3	142	16.8577	-0.000184548	16.8577	-0.000115981	16.8577	-6.45e-05	16.8577	-6.75e-05	16.8577	3.403629507665526e-05	16.8577	5.055085082446634e-07	16.8577	-8.55e-06	16.8577	-2.56e-05	16.8577	2.3065457297199088e-05	16.8577	-1.2e-05	16.8577	-4.67e-05	16.8577	-1.95e-05	16.8577	-0.000102324	16.8577	-8.23e-05	16.8577	-9.09e-05	16.8577	-5.72e-05	16.8577	-7.77e-05	16.8577	-4.41e-05	16.8577	-0.000192932	16.8577	-0.000126903	16.8577	-2.55e-05	16.8577	-5.71e-05
15650	705	E70Q	361	$JT$3	143	16.9079	-0.000169405	16.9079	-0.000139871	16.9079	-9.92e-05	16.9079	-9.48e-05	16.9079	-0.000107621	16.9079	-7.48e-05	16.9079	-0.000124108	16.9079	-0.000108181	16.9079	-1.28e-05	16.9079	-3.57e-05	16.9079	-0.000143119	16.9079	-4.7e-05	16.9079	-5.53e-05	16.9079	-1.68e-05	16.9079	-1.06e-05	16.9079	-5.57e-05	16.9079	-8.82e-05	16.9079	-3.26e-05	16.9079	-0.000149485	16.9079	-0.000114826	16.9079	-0.000102804	16.9079	-6.67e-05
15651	740	E70Q	361	$JV$3	144	16.9581	-0.000129174	16.9581	-0.000152014	16.9581	-2.73e-05	16.9581	-0.000118262	16.9581	-1.92e-05	16.9581	-2.32e-05	16.9581	6.496720085241801e-06	16.9581	-6.05e-05	16.9581	-4.57e-06	16.9581	1.0830344706780348e-05	16.9581	-2.67e-05	16.9581	-3.08e-05	16.9581	-9.42e-05	16.9581	-0.00016619	16.9581	3.846518518066432e-05	16.9581	1.572333795837183e-05	16.9581	-5.18e-05	16.9581	-3.6e-05	16.9581	-0.000142507	16.9581	-0.000136297	16.9581	-8.69e-05	16.9581	-8.43e-05
15652	705	E70Q	361	$JX$3	145	17.0083	-7.11e-05	17.0083	-5.43e-05	17.0083	-8.22e-05	17.0083	-7.68e-05	17.0083	-6.68e-05	17.0083	-0.00010499	17.0083	-7.09e-05	17.0083	-7.2e-05	17.0083	7.429304979962277e-06	17.0083	-2.47e-05	17.0083	-0.000113432	17.0083	-4.24e-05	17.0083	-5.2e-05	17.0083	-0.00010277	17.0083	-7.38e-05	17.0083	-1.93e-05	17.0083	1.4925470360766663e-07	17.0083	-1.78e-05	17.0083	-0.000160441	17.0083	-9.83e-05	17.0083	-0.000159398	17.0083	-9.87e-05
15653	740	E70Q	361	$JZ$3	146	17.0091	-0.00653861	17.0091	-0.000154017	17.0091	-0.00655385	17.0091	-7.18e-05	17.0091	-0.00644124	17.0091	-8.37e-05	17.0091	-0.00639456	17.0091	-8.77e-05	17.0091	-0.00652244	17.0091	-0.000156617	17.0091	-0.006485	17.0091	-2.4e-05	17.0091	-0.00616028	17.0091	-9.49e-05	17.0091	-0.00633482	17.0091	-0.000165577	17.0091	-0.00619628	17.0091	-6.23e-05	17.0091	-0.00650915	17.0091	-0.000202949	17.0091	-0.00625264	17.0091	-0.000121041
15654	705	E70Q	361	$KB$3	147	17.0099	-0.0062604	17.0099	0.000153525	17.0099	-0.00631158	17.0099	0.000163582	17.0099	-0.00617352	17.0099	0.000206502	17.0099	-0.00605732	17.0099	0.000184626	17.0099	-0.00608165	17.0099	0.000222651	17.0099	-0.00617833	17.0099	0.000105566	17.0099	-0.00599124	17.0099	9.208157645030149e-05	17.0099	-0.00597217	17.0099	0.000158239	17.0099	-0.00589369	17.0099	0.000186763	17.0099	-0.00628156	17.0099	8.07552407754257e-05	17.0099	-0.00604317	17.0099	0.000146565
15655	740	E70Q	361	$KD$3	148	17.0107	-0.0062613	17.0107	0.000135476	17.0107	-0.00624761	17.0107	0.000135681	17.0107	-0.00614496	17.0107	8.457149064427984e-05	17.0107	-0.00599445	17.0107	0.000152768	17.0107	-0.00588892	17.0107	0.000241857	17.0107	-0.00603023	17.0107	0.000134425	17.0107	-0.00577644	17.0107	7.431522010522239e-05	17.0107	-0.00578322	17.0107	0.000142016	17.0107	-0.00578371	17.0107	8.990650858363078e-05	17.0107	-0.00621482	17.0107	7.906738281100896e-05	17.0107	-0.0059628	17.0107	0.000160277
15656	705	E70Q	361	$KF$3	149	17.0115	-0.00626025	17.0115	0.000161194	17.0115	-0.00615723	17.0115	0.000171122	17.0115	-0.00609175	17.0115	0.000119217	17.0115	-0.00586275	17.0115	0.000174507	17.0115	-0.00590593	17.0115	0.000127094	17.0115	-0.00590628	17.0115	9.006403722322531e-05	17.0115	-0.00554023	17.0115	0.000123371	17.0115	-0.00558631	17.0115	0.000144507	17.0115	-0.00553959	17.0115	0.000116563	17.0115	-0.00609511	17.0115	0.000142393	17.0115	-0.00594287	17.0115	0.000144493
15657	740	E70Q	361	$KH$3	150	17.0124	-0.00616369	17.0124	0.000109192	17.0124	-0.00616053	17.0124	0.000189668	17.0124	-0.00582543	17.0124	0.000178937	17.0124	-0.00574952	17.0124	0.000152239	17.0124	-0.00568141	17.0124	0.000217261	17.0124	-0.00577162	17.0124	6.851862290563338e-05	17.0124	-0.00547751	17.0124	6.191925617242064e-05	17.0124	-0.00539191	17.0124	0.000158496	17.0124	-0.00527552	17.0124	0.000155842	17.0124	-0.0061263	17.0124	6.681399875496478e-05	17.0124	-0.00585131	17.0124	0.000142994
15658	705	R66Q	362	$KJ$3	151	17.0134	-0.00614827	17.0134	2.9905089364450077e-05	17.0134	-0.00605688	17.0134	0.000203614	17.0134	-0.00578878	17.0134	0.000209035	17.0134	-0.00562221	17.0134	0.000202852	17.0134	-0.00559955	17.0134	0.000131085	17.0134	-0.00562974	17.0134	4.226147091346277e-05	17.0134	-0.00527708	17.0134	7.337535761497115e-05	17.0134	-0.00517722	17.0134	0.00017383	17.0134	-0.00512949	17.0134	0.000116811	17.0134	-0.00592528	17.0134	0.000134357	17.0134	-0.00570735	17.0134	0.000191587
15659	740	R66Q	362	$KL$3	152	17.0144	-0.00595205	17.0144	0.000141204	17.0144	-0.00595852	17.0144	0.000241611	17.0144	-0.00568866	17.0144	0.000207372	17.0144	-0.00553778	17.0144	0.000170275	17.0144	-0.00537593	17.0144	0.000185433	17.0144	-0.00534648	17.0144	9.270449451953544e-05	17.0144	-0.00498767	17.0144	9.215221784299524e-05	17.0144	-0.00502409	17.0144	0.000195212	17.0144	-0.00494629	17.0144	0.000110124	17.0144	-0.00589291	17.0144	0.000139763	17.0144	-0.00570876	17.0144	0.000102006
15660	705	R66Q	362	$KN$3	153	17.0154	-0.00589904	17.0154	0.00017284	17.0154	-0.00595343	17.0154	8.089127475177649e-05	17.0154	-0.00548935	17.0154	0.000200716	17.0154	-0.00533748	17.0154	0.000137525	17.0154	-0.00529762	17.0154	0.000119374	17.0154	-0.00515079	17.0154	0.000112184	17.0154	-0.00488966	17.0154	1.1756144443215988e-05	17.0154	-0.00472283	17.0154	0.000110414	17.0154	-0.00460547	17.0154	0.000142404	17.0154	-0.00589905	17.0154	5.351313376226498e-05	17.0154	-0.00545336	17.0154	0.000241762
15661	740	R66Q	362	$KP$3	154	17.0166	-0.00587538	17.0166	0.00012802	17.0166	-0.00571211	17.0166	0.000202674	17.0166	-0.00549354	17.0166	9.822113305415006e-05	17.0166	-0.00533155	17.0166	9.306274482174907e-05	17.0166	-0.0050774	17.0166	0.000188944	17.0166	-0.0049945	17.0166	6.49123352704506e-05	17.0166	-0.00460413	17.0166	0.000150036	17.0166	-0.00453407	17.0166	0.000200321	17.0166	-0.00440177	17.0166	0.000160464	17.0166	-0.00580007	17.0166	0.000116376	17.0166	-0.00534614	17.0166	0.000275549
15664	705	R66Q	362	$KR$3	155	17.0178	-0.00567524	17.0178	0.000180545	17.0178	-0.00558862	17.0178	0.000243919	17.0178	-0.00529593	17.0178	0.000196249	17.0178	-0.00507272	17.0178	0.000202225	17.0178	-0.00489562	17.0178	0.000190766	17.0178	-0.00467416	17.0178	0.000105714	17.0178	-0.00455119	17.0178	8.087680595313292e-05	17.0178	-0.00448077	17.0178	9.981074803542579e-05	17.0178	-0.00428236	17.0178	0.000111077	17.0178	-0.00576338	17.0178	9.572573138443355e-05	17.0178	-0.00532686	17.0178	0.000160653
15665	740	R66Q	362	$KT$3	156	17.0191	-0.0056144	17.0191	0.000144786	17.0191	-0.0055799	17.0191	0.000175624	17.0191	-0.00518766	17.0191	0.000152275	17.0191	-0.00484333	17.0191	0.000160232	17.0191	-0.0048185	17.0191	9.658187079660853e-05	17.0191	-0.00461072	17.0191	8.980234596089876e-05	17.0191	-0.00430623	17.0191	0.000111314	17.0191	-0.00417924	17.0191	0.000185716	17.0191	-0.0040248	17.0191	0.000182554	17.0191	-0.00552661	17.0191	0.000136547	17.0191	-0.00518136	17.0191	0.000185706
15670	705	R66Q	362	$KV$3	157	17.0205	-0.00555655	17.0205	0.000159016	17.0205	-0.00539468	17.0205	0.000159782	17.0205	-0.00498533	17.0205	0.000204312	17.0205	-0.00474526	17.0205	0.00022344	17.0205	-0.00450853	17.0205	0.000194915	17.0205	-0.00431921	17.0205	0.000109035	17.0205	-0.00402393	17.0205	9.908944370386023e-05	17.0205	-0.00402783	17.0205	7.770971935217377e-05	17.0205	-0.00380176	17.0205	0.000156977	17.0205	-0.00542176	17.0205	0.000238115	17.0205	-0.00502277	17.0205	0.000173424
15671	740	R66Q	362	$KX$3	158	17.0219	-0.00548507	17.0219	0.000171442	17.0219	-0.00538841	17.0219	0.000128949	17.0219	-0.00494125	17.0219	0.000104761	17.0219	-0.00455035	17.0219	0.000154319	17.0219	-0.00450532	17.0219	0.000138834	17.0219	-0.00421403	17.0219	6.901822578692096e-05	17.0219	-0.00382939	17.0219	0.000135454	17.0219	-0.00377114	17.0219	0.000161922	17.0219	-0.0036781	17.0219	0.000110471	17.0219	-0.00544113	17.0219	0.000124944	17.0219	-0.00492077	17.0219	0.000251167
15672	705	R66Q	362	$KZ$3	159	17.0235	-0.00539795	17.0235	0.000139661	17.0235	-0.00518334	17.0235	0.000232333	17.0235	-0.00458552	17.0235	0.000275867	17.0235	-0.00447848	17.0235	8.595209534105301e-05	17.0235	-0.00419564	17.0235	0.000234658	17.0235	-0.00394534	17.0235	0.000137301	17.0235	-0.00375989	17.0235	6.991359620819003e-05	17.0235	-0.00358875	17.0235	0.000184382	17.0235	-0.00343801	17.0235	0.000108596	17.0235	-0.00524084	17.0235	0.000135995	17.0235	-0.00490298	17.0235	0.000137367
15673	740	R66Q	362	$LB$3	160	17.0251	-0.00521402	17.0251	0.000199097	17.0251	-0.00521511	17.0251	0.000156323	17.0251	-0.00464286	17.0251	0.000165867	17.0251	-0.0042355	17.0251	0.00021991	17.0251	-0.00407894	17.0251	0.00015324	17.0251	-0.00388887	17.0251	8.04088606430331e-05	17.0251	-0.00356051	17.0251	2.9781920706978965e-05	17.0251	-0.00341115	17.0251	0.000202881	17.0251	-0.00332085	17.0251	0.000104941	17.0251	-0.00533393	17.0251	0.000100511	17.0251	-0.0047117	17.0251	0.000207984
15674	705	R66Q	362	$LD$3	161	17.0269	-0.00517338	17.0269	0.000200302	17.0269	-0.00494049	17.0269	0.000250517	17.0269	-0.00437096	17.0269	0.000266569	17.0269	-0.00401513	17.0269	0.000210165	17.0269	-0.00385559	17.0269	0.000224228	17.0269	-0.00361126	17.0269	0.000122966	17.0269	-0.00331597	17.0269	5.865408591606246e-05	17.0269	-0.00326316	17.0269	9.814500239319415e-05	17.0269	-0.00310801	17.0269	0.000147779	17.0269	-0.00510821	17.0269	0.000160428	17.0269	-0.00466932	17.0269	0.000146049
15675	740	R66Q	362	$LF$3	162	17.0287	-0.00501043	17.0287	0.000200911	17.0287	-0.00483691	17.0287	0.000271786	17.0287	-0.00434386	17.0287	0.000202796	17.0287	-0.00391237	17.0287	0.000181298	17.0287	-0.00371572	17.0287	9.00774528570427e-05	17.0287	-0.00344745	17.0287	0.000119089	17.0287	-0.00324929	17.0287	3.277830528219429e-05	17.0287	-0.00312373	17.0287	8.994724114328063e-05	17.0287	-0.00283324	17.0287	0.000163451	17.0287	-0.00488546	17.0287	0.000210958	17.0287	-0.00448139	17.0287	0.000164426
15676	705	R66Q	362	$LH$3	163	17.0307	-0.00493268	17.0307	0.000179939	17.0307	-0.00476239	17.0307	0.00016901	17.0307	-0.00411624	17.0307	0.00022148	17.0307	-0.00373836	17.0307	0.000196454	17.0307	-0.00358848	17.0307	7.273279603300757e-05	17.0307	-0.00318792	17.0307	0.000105794	17.0307	-0.0029296	17.0307	0.000101155	17.0307	-0.00283277	17.0307	0.000175704	17.0307	-0.00269376	17.0307	0.000131197	17.0307	-0.00484051	17.0307	0.000159313	17.0307	-0.00443037	17.0307	9.819176460749458e-05
15677	740	R66Q	362	$LJ$3	164	17.0328	-0.00474032	17.0328	0.000175684	17.0328	-0.00455782	17.0328	0.000181525	17.0328	-0.00393198	17.0328	0.000165088	17.0328	-0.00365386	17.0328	9.846216969533646e-05	17.0328	-0.0032304	17.0328	0.000180466	17.0328	-0.00298706	17.0328	0.000125148	17.0328	-0.00280414	17.0328	9.90500736401511e-05	17.0328	-0.00265989	17.0328	0.000131308	17.0328	-0.00257921	17.0328	8.140424126807516e-05	17.0328	-0.00471689	17.0328	0.000176875	17.0328	-0.00421544	17.0328	0.000170369
15678	705	R66Q	362	$LL$3	165	17.035	-0.00467099	17.035	0.000194529	17.035	-0.00444071	17.035	0.00020043	17.035	-0.00386618	17.035	9.103156597841874e-05	17.035	-0.00339259	17.035	0.000128057	17.035	-0.0031406	17.035	0.000156245	17.035	-0.00296175	17.035	7.964587896652775e-05	17.035	-0.00271486	17.035	5.9661577346142164e-05	17.035	-0.00262051	17.035	5.493567571377041e-05	17.035	-0.00239843	17.035	9.378417938500638e-05	17.035	-0.00468936	17.035	0.000121633	17.035	-0.00414259	17.035	0.000124139
15679	740	R66Q	362	$LN$3	166	17.0374	-0.0045249	17.0374	0.00019335	17.0374	-0.00425704	17.0374	0.000244331	17.0374	-0.00358666	17.0374	0.000164798	17.0374	-0.00323156	17.0374	0.000172579	17.0374	-0.00298376	17.0374	9.801259231661565e-05	17.0374	-0.00281137	17.0374	9.52615722973893e-05	17.0374	-0.00241521	17.0374	0.000119764	17.0374	-0.0023938	17.0374	0.00015569	17.0374	-0.00223668	17.0374	0.000109778	17.0374	-0.00456188	17.0374	0.000129246	17.0374	-0.00394004	17.0374	0.000132073
15680	705	R66Q	362	$LP$3	167	17.0399	-0.00447009	17.0399	0.000214179	17.0399	-0.00417152	17.0399	0.000129892	17.0399	-0.00345944	17.0399	0.000158319	17.0399	-0.00305797	17.0399	0.000131107	17.0399	-0.00276253	17.0399	0.000183634	17.0399	-0.00268594	17.0399	3.041080101162663e-05	17.0399	-0.00236211	17.0399	6.744695422588286e-05	17.0399	-0.00227372	17.0399	5.8482195543156645e-05	17.0399	-0.00212868	17.0399	0.000146103	17.0399	-0.00438098	17.0399	0.000110966	17.0399	-0.00384487	17.0399	0.000174077
15681	740	R66Q	362	$LR$3	168	17.0426	-0.00430803	17.0426	0.000111726	17.0426	-0.00416017	17.0426	9.471192078487796e-05	17.0426	-0.00332449	17.0426	0.000172631	17.0426	-0.00288245	17.0426	0.000154034	17.0426	-0.00258277	17.0426	9.857933356169704e-05	17.0426	-0.00246229	17.0426	6.396636009581291e-05	17.0426	-0.00217727	17.0426	5.99492621786539e-05	17.0426	-0.00207579	17.0426	6.438658412079128e-05	17.0426	-0.00196935	17.0426	0.000102194	17.0426	-0.00428261	17.0426	0.000128397	17.0426	-0.00366213	17.0426	0.000176422
15724	705	E69Q	365	$LT$3	169	17.0455	-0.00410134	17.0455	0.000273274	17.0455	-0.00388495	17.0455	0.00016293	17.0455	-0.00312197	17.0455	0.000186822	17.0455	-0.00265884	17.0455	0.000193236	17.0455	-0.00246765	17.0455	0.000136622	17.0455	-0.00223343	17.0455	7.44092277134567e-05	17.0455	-0.00205339	17.0455	4.367640876032711e-05	17.0455	-0.00188525	17.0455	0.000119391	17.0455	-0.00178011	17.0455	8.271496310179559e-05	17.0455	-0.00421355	17.0455	8.253844254547775e-05	17.0455	-0.00361696	17.0455	8.162179756088066e-05
15725	740	E69Q	365	$LV$3	170	17.0485	-0.0041511	17.0485	0.000144302	17.0485	-0.00372417	17.0485	0.000186735	17.0485	-0.00300801	17.0485	0.000164888	17.0485	-0.00267224	17.0485	6.081908867313496e-05	17.0485	-0.00231758	17.0485	8.124933575159518e-05	17.0485	-0.00217797	17.0485	4.7461320451858136e-05	17.0485	-0.00188354	17.0485	1.5788314845962756e-05	17.0485	-0.00190953	17.0485	3.7726361993291324e-05	17.0485	-0.00181458	17.0485	4.588274430550321e-05	17.0485	-0.0040652	17.0485	7.93733604938611e-05	17.0485	-0.0034208	17.0485	9.86848952243529e-05
15726	705	E69Q	365	$LX$3	171	17.0517	-0.00391232	17.0517	0.000105348	17.0517	-0.00351338	17.0517	0.000120215	17.0517	-0.00292106	17.0517	0.000102269	17.0517	-0.00238681	17.0517	8.953140842807121e-05	17.0517	-0.00214576	17.0517	0.000136052	17.0517	-0.001978	17.0517	4.0619947484110686e-05	17.0517	-0.00183067	17.0517	-7.25e-07	17.0517	-0.00170101	17.0517	0.000121107	17.0517	-0.0016851	17.0517	5.8565005060162365e-05	17.0517	-0.00383757	17.0517	0.000139498	17.0517	-0.00330546	17.0517	9.494992747937497e-05
15727	740	E69Q	365	$LZ$3	172	17.0552	-0.00384598	17.0552	5.716734264018218e-05	17.0552	-0.00334865	17.0552	0.00014121	17.0552	-0.00263323	17.0552	0.000105477	17.0552	-0.0022158	17.0552	0.000123684	17.0552	-0.00198094	17.0552	9.11975527704452e-05	17.0552	-0.00178224	17.0552	5.4496203303500135e-05	17.0552	-0.00171358	17.0552	-3.49e-05	17.0552	-0.00157629	17.0552	0.000121834	17.0552	-0.00153991	17.0552	4.523866597283717e-05	17.0552	-0.00379445	17.0552	0.000109041	17.0552	-0.00311033	17.0552	0.000100723
15728	705	E69Q	365	$MB$3	173	17.0588	-0.00367748	17.0588	7.826500567651405e-05	17.0588	-0.00323572	17.0588	0.00019473	17.0588	-0.00250701	17.0588	7.760755232782014e-05	17.0588	-0.00202766	17.0588	0.000105516	17.0588	-0.00189378	17.0588	9.898623834299347e-05	17.0588	-0.00171415	17.0588	5.307659573849932e-05	17.0588	-0.00163452	17.0588	9.559609646207778e-06	17.0588	-0.0015347	17.0588	2.0242303398582476e-05	17.0588	-0.00142669	17.0588	-8.81e-07	17.0588	-0.00362154	17.0588	7.547464491058573e-05	17.0588	-0.00291857	17.0588	0.00010986
15729	740	E69Q	365	$MD$3	174	17.0627	-0.00354047	17.0627	0.000124735	17.0627	-0.00311955	17.0627	0.000115341	17.0627	-0.00233269	17.0627	7.542849976925094e-05	17.0627	-0.00187313	17.0627	0.000120628	17.0627	-0.00173381	17.0627	6.201244486242138e-05	17.0627	-0.00155479	17.0627	5.048579091482264e-05	17.0627	-0.0014099	17.0627	-6.72e-06	17.0627	-0.00135108	17.0627	0.000111931	17.0627	-0.00134979	17.0627	5.5219004222371165e-05	17.0627	-0.0034688	17.0627	0.000101894	17.0627	-0.00273999	17.0627	0.000102111
15730	705	E69Q	365	$MF$3	175	17.0668	-0.00327876	17.0668	0.000147118	17.0668	-0.00293825	17.0668	0.000190655	17.0668	-0.00211957	17.0668	5.133003803783377e-05	17.0668	-0.0018057	17.0668	7.481325366461705e-05	17.0668	-0.00154722	17.0668	4.370869679047075e-05	17.0668	-0.00143957	17.0668	4.135093610430074e-05	17.0668	-0.00129595	17.0668	3.688689488423255e-05	17.0668	-0.00125647	17.0668	1.4742364202745967e-05	17.0668	-0.00112072	17.0668	0.000118213	17.0668	-0.00331348	17.0668	5.5163095806005924e-05	17.0668	-0.00254969	17.0668	0.000137952
15731	740	E69Q	365	$MH$3	176	17.0712	-0.00312608	17.0712	0.00013252	17.0712	-0.00273681	17.0712	0.000146158	17.0712	-0.00198505	17.0712	6.102375128383408e-05	17.0712	-0.00162218	17.0712	5.011804739680527e-05	17.0712	-0.00153912	17.0712	-1.19e-05	17.0712	-0.00128865	17.0712	4.4653560087037913e-05	17.0712	-0.00118291	17.0712	-6.56e-06	17.0712	-0.00116424	17.0712	7.441923303603583e-05	17.0712	-0.00102565	17.0712	3.1664505079347094e-05	17.0712	-0.00318025	17.0712	3.464421073540863e-05	17.0712	-0.00252163	17.0712	-2.7e-07
15732	705	E69Q	365	$MJ$3	177	17.0758	-0.00303436	17.0758	4.4715971692178835e-05	17.0758	-0.00266045	17.0758	6.177408072679906e-05	17.0758	-0.0018522	17.0758	7.205549898516451e-05	17.0758	-0.00157073	17.0758	2.896069730719264e-05	17.0758	-0.0012685	17.0758	9.948085804353801e-05	17.0758	-0.00129434	17.0758	3.720098435949781e-05	17.0758	-0.00108282	17.0758	-5.23e-07	17.0758	-0.00109013	17.0758	5.5237711539113735e-05	17.0758	-0.00102847	17.0758	2.853218433329814e-05	17.0758	-0.00298892	17.0758	1.0458559111130306e-05	17.0758	-0.00235445	17.0758	0.000100855
15733	740	E69Q	365	$ML$3	178	17.0808	-0.00283817	17.0808	0.000141805	17.0808	-0.00244883	17.0808	8.368176463081564e-05	17.0808	-0.0017587	17.0808	5.7139670649319386e-05	17.0808	-0.00134209	17.0808	8.89179564170263e-05	17.0808	-0.00123755	17.0808	2.1219117269655197e-05	17.0808	-0.00119934	17.0808	-3.05e-05	17.0808	-0.00114333	17.0808	-0.000109376	17.0808	-0.00100638	17.0808	4.0682572663663236e-05	17.0808	-0.000968232	17.0808	6.457381157663061e-05	17.0808	-0.00294573	17.0808	-1.09e-05	17.0808	-0.00223871	17.0808	2.3123095905758922e-05
15734	705	E69Q	365	$MN$3	179	17.0861	-0.002789	17.0861	8.381936284234184e-06	17.0861	-0.00237283	17.0861	1.6223264754941166e-05	17.0861	-0.00155013	17.0861	8.769087450810446e-05	17.0861	-0.00138423	17.0861	-3e-05	17.0861	-0.00110139	17.0861	1.0519028836142308e-05	17.0861	-0.0010306	17.0861	5.794499226663419e-05	17.0861	-0.000903568	17.0861	-1.62e-05	17.0861	-0.000941127	17.0861	-1.44e-05	17.0861	-0.000854765	17.0861	8.887662745071107e-05	17.0861	-0.00265711	17.0861	2.935470997664051e-05	17.0861	-0.0020294	17.0861	6.699560621267579e-05
15735	740	E69Q	365	$MP$3	180	17.0916	-0.00252167	17.0916	6.70785212463186e-05	17.0916	-0.00213912	17.0916	8.785149721376312e-05	17.0916	-0.00147343	17.0916	3.82340001350524e-05	17.0916	-0.00119455	17.0916	2.6719168529792253e-05	17.0916	-0.00108802	17.0916	-5.17e-05	17.0916	-0.000888655	17.0916	1.0336803026478325e-05	17.0916	-0.000883876	17.0916	-3.14e-05	17.0916	-0.000839272	17.0916	4.223382952476401e-05	17.0916	-0.00089106	17.0916	-2.19e-05	17.0916	-0.0025311	17.0916	3.891265138342495e-05	17.0916	-0.00194543	17.0916	2.370501391147327e-05
15736	705	E69Q	365	$MR$3	181	17.0976	-0.00233908	17.0976	6.0092400519956915e-05	17.0976	-0.00201712	17.0976	8.510521398801159e-05	17.0976	-0.00125655	17.0976	6.738568826754766e-05	17.0976	-0.00102053	17.0976	5.8675107659517806e-05	17.0976	-0.000961563	17.0976	2.7164462347155013e-05	17.0976	-0.000866102	17.0976	1.6700033605432374e-06	17.0976	-0.000773733	17.0976	-4.28e-05	17.0976	-0.000714736	17.0976	5.435223632066152e-05	17.0976	-0.000650382	17.0976	9.178061745859951e-05	17.0976	-0.00239028	17.0976	1.8106455376577096e-05	17.0976	-0.00167468	17.0976	6.140615211338088e-05
15737	740	E69Q	365	$MT$3	182	17.1039	-0.00229479	17.1039	8.246850540640123e-05	17.1039	-0.00190069	17.1039	5.741206953333543e-05	17.1039	-0.00115671	17.1039	8.547697529505925e-05	17.1039	-0.000886975	17.1039	7.153677139035142e-05	17.1039	-0.000883299	17.1039	1.948014504470942e-05	17.1039	-0.000772658	17.1039	1.3011851329791657e-05	17.1039	-0.000780361	17.1039	-8.31e-05	17.1039	-0.000793277	17.1039	-4.95e-05	17.1039	-0.000653696	17.1039	2.564260035330286e-05	17.1039	-0.00227735	17.1039	-2.8e-06	17.1039	-0.0015523	17.1039	-6.04e-06
15738	705	E69Q	365	$MV$3	183	17.1106	-0.00204961	17.1106	6.809365469922363e-05	17.1106	-0.00163897	17.1106	6.718293864281868e-05	17.1106	-0.00104247	17.1106	7.063047652287619e-05	17.1106	-0.000965626	17.1106	-4.67e-05	17.1106	-0.000852613	17.1106	-7.07e-05	17.1106	-0.00070081	17.1106	-2.76e-06	17.1106	-0.000686536	17.1106	-8.25e-05	17.1106	-0.000593088	17.1106	-3.91e-05	17.1106	-0.000664609	17.1106	1.689648412954957e-05	17.1106	-0.00211949	17.1106	1.3727847974728466e-05	17.1106	-0.00144557	17.1106	1.283669301959528e-05
15739	740	E69Q	365	$MX$3	184	17.1178	-0.00199425	17.1178	-3.27e-05	17.1178	-0.00157511	17.1178	2.931817443485238e-05	17.1178	-0.00104091	17.1178	-7.34e-06	17.1178	-0.000767773	17.1178	2.692775228797621e-05	17.1178	-0.000684301	17.1178	2.3498116285200488e-06	17.1178	-0.000593898	17.1178	2.3902276936993427e-05	17.1178	-0.000564847	17.1178	-6.76e-05	17.1178	-0.00050476	17.1178	3.512417357900456e-05	17.1178	-0.000506408	17.1178	-3.48e-05	17.1178	-0.0019326	17.1178	-3.61e-05	17.1178	-0.00135861	17.1178	7.83457154985151e-05
15740	705	E69Q	365	$MZ$3	185	17.1254	-0.00178376	17.1254	2.8671121833532057e-05	17.1254	-0.00143516	17.1254	5.0919374983630916e-05	17.1254	-0.000897321	17.1254	-2.6e-05	17.1254	-0.000736691	17.1254	-4.05e-05	17.1254	-0.000582678	17.1254	9.124136295246901e-06	17.1254	-0.000533823	17.1254	2.5415674875461924e-05	17.1254	-0.000522329	17.1254	-3.14e-05	17.1254	-0.000445995	17.1254	-1.42e-05	17.1254	-0.000565919	17.1254	-3.65e-05	17.1254	-0.00177636	17.1254	-1.02e-05	17.1254	-0.00123377	17.1254	-3.99e-06
15741	740	E69Q	365	$NB$3	186	17.1334	-0.00168195	17.1334	3.884137197604845e-06	17.1334	-0.0013963	17.1334	-5.35e-06	17.1334	-0.000724227	17.1334	6.457331697250473e-05	17.1334	-0.000514061	17.1334	1.161623231208525e-05	17.1334	-0.000559824	17.1334	9.948496053499567e-06	17.1334	-0.00044333	17.1334	8.738299345001366e-06	17.1334	-0.000418716	17.1334	-2.32e-05	17.1334	-0.000388794	17.1334	1.6212488367257916e-06	17.1334	-0.000408628	17.1334	-3.31e-06	17.1334	-0.00160435	17.1334	-2.45e-05	17.1334	-0.00105824	17.1334	-7.5e-06
15742	705	E69Q/E70Q	366	$ND$3	187	17.142	-0.00151676	17.142	-4.37e-06	17.142	-0.00123428	17.142	8.807320494330292e-06	17.142	-0.000770565	17.142	-6.51e-05	17.142	-0.000503446	17.142	2.2476536371541372e-05	17.142	-0.000448904	17.142	4.4546339104481816e-05	17.142	-0.000489791	17.142	-9.22e-06	17.142	-0.000349745	17.142	-7.5e-05	17.142	-0.00039052	17.142	2.847354259354236e-05	17.142	-0.000369478	17.142	3.8236281098972744e-05	17.142	-0.00156462	17.142	-5.09e-05	17.142	-0.000971854	17.142	-1.57e-05
15743	740	E69Q/E70Q	366	$NF$3	188	17.1511	-0.00140492	17.1511	-8.14e-05	17.1511	-0.00107716	17.1511	-3.35e-05	17.1511	-0.000637134	17.1511	-3.12e-05	17.1511	-0.000370572	17.1511	1.2516978992948083e-05	17.1511	-0.000429536	17.1511	-1.87e-05	17.1511	-0.000380747	17.1511	3.138520447865112e-06	17.1511	-0.000341587	17.1511	-2.47e-05	17.1511	-0.000256261	17.1511	-5.91e-06	17.1511	-0.000292488	17.1511	1.446889374442581e-05	17.1511	-0.00143413	17.1511	-9.31e-05	17.1511	-0.000884879	17.1511	3.3052781862729502e-06
15746	705	E69Q/E70Q	366	$NH$3	189	17.1608	-0.00121756	17.1608	1.0879079410962278e-05	17.1608	-0.000873686	17.1608	2.5008257483858862e-05	17.1608	-0.000468479	17.1608	-1.53e-05	17.1608	-0.000396179	17.1608	-4.42e-05	17.1608	-0.000290718	17.1608	4.62211497169792e-05	17.1608	-0.000410752	17.1608	-7.25e-05	17.1608	-0.000244845	17.1608	-3.64e-05	17.1608	-0.000301728	17.1608	3.460566006216123e-05	17.1608	-0.00022398	17.1608	3.253338636305392e-05	17.1608	-0.00127881	17.1608	-4.22e-05	17.1608	-0.000828407	17.1608	-9.2e-05
15747	740	E69Q/E70Q	366	$NJ$3	190	17.1711	-0.00115778	17.1711	-3.86e-05	17.1711	-0.000841172	17.1711	1.312188308134378e-05	17.1711	-0.000558705	17.1711	-8.01e-05	17.1711	-0.00032541	17.1711	-3.97e-05	17.1711	-0.000277851	17.1711	-2.61e-05	17.1711	-0.000196323	17.1711	1.1138356468376465e-05	17.1711	-0.00027757	17.1711	-8.1e-05	17.1711	-0.000274876	17.1711	-2.85e-05	17.1711	-0.000140645	17.1711	6.071645883722748e-05	17.1711	-0.00120895	17.1711	-0.000115678	17.1711	-0.000751593	17.1711	-3.57e-05
15770	705	E69Q/E70Q	366	$NL$3	191	17.1821	-0.000992946	17.1821	-4.9e-05	17.1821	-0.000693092	17.1821	2.970178537263675e-05	17.1821	-0.000344959	17.1821	-2.62e-05	17.1821	-0.000311748	17.1821	-4.07e-06	17.1821	-0.000261923	17.1821	-2.32e-05	17.1821	-0.000183361	17.1821	4.7879907956849266e-05	17.1821	-0.000256853	17.1821	-5.07e-05	17.1821	-0.000189946	17.1821	-2.09e-05	17.1821	-0.000164968	17.1821	-1.72e-05	17.1821	-0.00114581	17.1821	-0.000108365	17.1821	-0.000677414	17.1821	-8.76e-05
15771	740	E69Q/E70Q	366	$NN$3	192	17.1937	-0.000940262	17.1937	-1.74e-05	17.1937	-0.000543812	17.1937	-1.33e-05	17.1937	-0.000380153	17.1937	-5.21e-05	17.1937	-0.000237252	17.1937	-1.74e-05	17.1937	-0.000223908	17.1937	-2.61e-05	17.1937	-0.000130513	17.1937	-5.11e-06	17.1937	-0.000267691	17.1937	-0.00010956	17.1937	-0.000140207	17.1937	-3.52e-05	17.1937	-0.000324679	17.1937	-0.000109402	17.1937	-0.00101255	17.1937	-0.000154921	17.1937	-0.000517926	17.1937	-5.79e-05
15774	705	E69Q/E70Q	366	$NP$3	193	17.2061	-0.000818169	17.2061	-6.51e-05	17.2061	-0.00061262	17.2061	-7.72e-05	17.2061	-0.000260599	17.2061	-1.26e-05	17.2061	-0.000308425	17.2061	-8.07e-05	17.2061	-0.000243667	17.2061	-1.48e-05	17.2061	-0.0001553	17.2061	-1.33e-05	17.2061	-9.26e-05	17.2061	-6.26e-05	17.2061	-0.000185555	17.2061	-2.07e-05	17.2061	-0.000194279	17.2061	-5.83e-05	17.2061	-0.000863319	17.2061	-7.33e-05	17.2061	-0.000510339	17.2061	-7.57e-05
15775	740	E69Q/E70Q	366	$NR$3	194	17.2193	-0.000743037	17.2193	-5.98e-05	17.2193	-0.000369602	17.2193	9.841130758232383e-06	17.2193	-0.000276732	17.2193	-1.87e-05	17.2193	-0.000259903	17.2193	-7.96e-05	17.2193	-7.78e-05	17.2193	5.5066515586638803e-05	17.2193	-0.000142439	17.2193	-1.93e-05	17.2193	-0.000158014	17.2193	-0.000101435	17.2193	-0.000134609	17.2193	-2.08e-05	17.2193	-0.000150375	17.2193	-4.47e-05	17.2193	-0.000868272	17.2193	-0.000220636	17.2193	-0.00033694	17.2193	-7.85e-05
15776	705	E69Q/E70Q	366	$NT$3	195	17.2332	-0.000736055	17.2332	-8.47e-05	17.2332	-0.00032572	17.2332	-2.72e-05	17.2332	-0.00023102	17.2332	-7.79e-05	17.2332	-0.000118755	17.2332	-3.92e-05	17.2332	-7.99e-05	17.2332	-2.04e-06	17.2332	-0.00023072	17.2332	-8.74e-05	17.2332	-0.000156654	17.2332	-0.0001494	17.2332	-0.000226001	17.2332	-4.09e-05	17.2332	-9.75e-05	17.2332	-4.12e-05	17.2332	-0.000685227	17.2332	-6.5e-05	17.2332	-0.000314256	17.2332	-7.09e-06
15777	740	E69Q/E70Q	366	$NV$3	196	17.2481	-0.000539649	17.2481	-7.78e-05	17.2481	-0.000352049	17.2481	6.524322246608677e-07	17.2481	-0.00014677	17.2481	1.3612355928468642e-05	17.2481	-8.59e-05	17.2481	-2.95e-05	17.2481	-8.3e-05	17.2481	-7.55e-05	17.2481	-0.000116507	17.2481	-1.4e-05	17.2481	-0.000175509	17.2481	-0.000106181	17.2481	-0.000164051	17.2481	-5.31e-05	17.2481	8.66855135467099e-06	17.2481	6.805763540497674e-05	17.2481	-0.000664105	17.2481	-0.000161049	17.2481	-0.000242078	17.2481	1.7572664386678039e-06
15778	705	E69Q/E70Q	366	$NX$3	197	17.2639	-0.000476305	17.2639	-7.05e-05	17.2639	-0.000252874	17.2639	-3.48e-05	17.2639	-0.000139746	17.2639	-4.07e-05	17.2639	-8.91e-05	17.2639	-5.88e-05	17.2639	-0.000151022	17.2639	-6.12e-05	17.2639	-6.31e-06	17.2639	-1.54e-05	17.2639	-3.76e-05	17.2639	-6.56e-05	17.2639	-5.82e-05	17.2639	2.7341484517842685e-05	17.2639	-4.67e-05	17.2639	-2.66e-05	17.2639	-0.000568259	17.2639	-0.000129559	17.2639	-0.000189288	17.2639	-1.47e-05
15779	740	E69Q/E70Q	366	$NZ$3	198	17.2807	-0.000409852	17.2807	-0.00011049	17.2807	-0.000200744	17.2807	1.865066302002283e-05	17.2807	-8.63e-05	17.2807	-2.49e-06	17.2807	-1.04e-05	17.2807	-1.99e-05	17.2807	-1.84e-05	17.2807	-1.47e-05	17.2807	-4.42e-05	17.2807	-1.02e-05	17.2807	-0.000199686	17.2807	-0.000155611	17.2807	-0.000145791	17.2807	-8.69e-05	17.2807	3.803333245529098e-05	17.2807	1.5086414937182796e-05	17.2807	-0.000539364	17.2807	-0.000142334	17.2807	-0.000239574	17.2807	1.2525245958461273e-06
15780	705	E69Q/E70Q	366	$OB$3	199	17.2986	-0.000350446	17.2986	-9.25e-05	17.2986	-0.000151574	17.2986	2.089134351267348e-05	17.2986	-8e-05	17.2986	-4.39e-05	17.2986	-0.00019948	17.2986	-9.82e-05	17.2986	-3.67e-05	17.2986	-4.13e-05	17.2986	-6.26e-05	17.2986	-7.29e-06	17.2986	-2.27e-06	17.2986	-4.08e-05	17.2986	3.872172005748003e-06	17.2986	-1.94e-05	17.2986	1.1877200405365027e-05	17.2986	5.7028596865793535e-05	17.2986	-0.000597381	17.2986	-0.00020998	17.2986	-0.000190942	17.2986	-4.54e-05
15781	740	E69Q/E70Q	366	$OD$3	200	17.3176	-0.00036473	17.3176	-0.00012383	17.3176	-0.000155865	17.3176	-9.42e-05	17.3176	-0.000113931	17.3176	-0.000119821	17.3176	5.393809755292571e-05	17.3176	-4.18e-05	17.3176	-3.92e-05	17.3176	7.5736067800362405e-06	17.3176	1.1854540348590903e-06	17.3176	9.889710738231194e-06	17.3176	-8.28e-05	17.3176	-0.000111601	17.3176	3.836292117450463e-05	17.3176	-3.1e-05	17.3176	7.981457124395762e-05	17.3176	4.773759312202801e-05	17.3176	-0.000465747	17.3176	-0.000211791	17.3176	-0.000215305	17.3176	-0.000106023
15784	705	E69Q/E70Q	366	$OF$3	201	17.3377	-0.000370225	17.3377	-0.000170831	17.3377	-4.5e-05	17.3377	-6.72e-06	17.3377	-8.76e-05	17.3377	-6.05e-05	17.3377	6.8735515187702285e-06	17.3377	-3.15e-05	17.3377	-0.000121662	17.3377	-0.000105934	17.3377	-9.03e-05	17.3377	-4.05e-05	17.3377	-4.36e-05	17.3377	-7.09e-05	17.3377	3.8361468749493425e-05	17.3377	3.0330101939483184e-05	17.3377	6.280219160375525e-05	17.3377	3.0938202706016354e-05	17.3377	-0.000308166	17.3377	-0.000149976	17.3377	-0.000231123	17.3377	-0.000115852
15785	740	E69Q/E70Q	366	$OH$3	202	17.3592	-0.000393	17.3592	-0.000192002	17.3592	-0.000214057	17.3592	-0.000101186	17.3592	-3.18e-05	17.3592	-1.8e-05	17.3592	-8.7e-05	17.3592	-8.87e-05	17.3592	-5.91e-05	17.3592	-5.27e-05	17.3592	-2.18e-05	17.3592	6.243062465938198e-06	17.3592	-0.000108916	17.3592	-0.000199745	17.3592	8.262087651288164e-05	17.3592	1.1356626258186495e-05	17.3592	-3.49e-05	17.3592	-2.36e-05	17.3592	-0.000344239	17.3592	-0.000112435	17.3592	-0.000115245	17.3592	-7.33e-05
15786	705	E69Q/E70Q	366	$OJ$3	203	17.382	-0.000331538	17.382	-0.000243801	17.382	-0.000119458	17.382	-6.73e-05	17.382	-3.9e-05	17.382	-4.06e-05	17.382	-9.69e-05	17.382	-6.17e-05	17.382	4.318433366007346e-05	17.382	-1.34e-05	17.382	-3.62e-05	17.382	-3.28e-05	17.382	-0.000136925	17.382	-0.000178654	17.382	-3.36e-05	17.382	-4.81e-05	17.382	3.066938063946926e-05	17.382	3.703910884508138e-05	17.382	-0.000451079	17.382	-0.000239451	17.382	-5.06e-05	17.382	-4.74e-05
15787	740	E69Q/E70Q	366	$OL$3	204	17.4063	-0.000212703	17.4063	-0.000135462	17.4063	-3.45e-05	17.4063	-3.68e-05	17.4063	-6.06e-05	17.4063	-6.5e-05	17.4063	1.6710134716386776e-05	17.4063	-2.13e-05	17.4063	-1.69e-05	17.4063	-6.48e-05	17.4063	1.2512217099344691e-05	17.4063	-2.52e-05	17.4063	-2.12e-05	17.4063	-0.000197415	17.4063	5.511459678844981e-05	17.4063	1.8744689212672402e-05	17.4063	-3.91e-05	17.4063	1.1427209914226244e-05	17.4063	-0.000333868	17.4063	-0.000233753	17.4063	-3.85e-05	17.4063	-0.000101916
15824	705	E69Q	370	$ON$3	205	17.432	-0.00021897	17.432	-0.000172432	17.432	-0.000104483	17.432	-0.00010112	17.432	-8.23e-05	17.432	-7.02e-05	17.432	-9.03e-05	17.432	-9.13e-05	17.432	-1.05e-05	17.432	-4.11e-05	17.432	-5.96e-05	17.432	9.133600375910156e-06	17.432	2.7469541883818217e-06	17.432	-8.59e-05	17.432	0.000126343	17.432	-9.56e-06	17.432	0.000108255	17.432	-2.21e-05	17.432	-0.000415234	17.432	-0.000259524	17.432	-7.51e-05	17.432	-6.04e-05
15825	740	E69Q	370	$OP$3	206	17.4594	-0.000132862	17.4594	-7.36e-05	17.4594	-6.98e-05	17.4594	-5.72e-05	17.4594	-4.44e-05	17.4594	-6.75e-05	17.4594	2.8820636405589616e-05	17.4594	-7.89e-05	17.4594	-7.92e-05	17.4594	-9.87e-05	17.4594	-7.56e-05	17.4594	-4.86e-05	17.4594	-4.15e-05	17.4594	-0.000139146	17.4594	4.3220291374956995e-05	17.4594	-5.74e-05	17.4594	8.344527010594599e-05	17.4594	4.35813642170671e-06	17.4594	-0.000284281	17.4594	-0.00019165	17.4594	-0.000146003	17.4594	-9.07e-05
15828	705	E69Q	370	$OR$3	207	17.4885	-0.000142835	17.4885	-0.000138931	17.4885	-2.84e-05	17.4885	-3.13e-05	17.4885	-8.27e-05	17.4885	-0.000107315	17.4885	2.9301000791954416e-05	17.4885	-8.79e-05	17.4885	2.305288443387051e-05	17.4885	-5.83e-06	17.4885	-2.6e-05	17.4885	-1.65e-05	17.4885	1.3480610558914584e-05	17.4885	-0.000105327	17.4885	7.101149431891387e-05	17.4885	-4.32e-06	17.4885	-5.04e-05	17.4885	-5.75e-05	17.4885	-0.000384981	17.4885	-0.000259858	17.4885	-9.41e-05	17.4885	-6.77e-05
15829	740	E69Q	370	$OT$3	208	17.5195	-0.000135385	17.5195	-8.75e-05	17.5195	-4.43e-05	17.5195	-4.46e-05	17.5195	-4.48e-05	17.5195	-6.33e-05	17.5195	6.016399701517508e-06	17.5195	-5.87e-05	17.5195	-8.81e-05	17.5195	-3.01e-05	17.5195	-2.24e-05	17.5195	-1.16e-05	17.5195	5.8742517703449636e-05	17.5195	-7.54e-05	17.5195	1.1595196950025827e-05	17.5195	2.4553596774095493e-05	17.5195	-7.69e-06	17.5195	-5.67e-05	17.5195	-0.000264864	17.5195	-0.000224657	17.5195	-1.37e-05	17.5195	-0.000127485
15838	705	E69Q	370	$OV$3	209	17.5524	-0.000171456	17.5524	-0.00020979	17.5524	4.279174055969552e-06	17.5524	-2.03e-05	17.5524	3.168515084414972e-05	17.5524	-3.53e-06	17.5524	7.300305270797154e-06	17.5524	-5.05e-05	17.5524	-9.28e-05	17.5524	-6.16e-05	17.5524	2.7965953152547796e-05	17.5524	-1.3e-06	17.5524	-6.26e-05	17.5524	-0.000160848	17.5524	2.658352976192763e-06	17.5524	-5.61e-05	17.5524	1.950501905438346e-06	17.5524	-4.2e-05	17.5524	-0.000287334	17.5524	-0.0001987	17.5524	-3.43e-06	17.5524	-0.000113182
15839	740	E69Q	370	$OX$3	210	17.5874	-0.00014251	17.5874	-0.000127664	17.5874	-6.45e-05	17.5874	-5.41e-05	17.5874	1.1829480912625354e-05	17.5874	-2.49e-05	17.5874	-2.2e-05	17.5874	-4.96e-05	17.5874	1.151144440266448e-05	17.5874	-1.47e-05	17.5874	7.504766479200092e-05	17.5874	-1.42e-05	17.5874	-4.31e-05	17.5874	-0.000105475	17.5874	2.9146223576750722e-05	17.5874	2.6315308566976503e-05	17.5874	4.2024471526162614e-05	17.5874	-5.59e-06	17.5874	-0.000235607	17.5874	-0.000196735	17.5874	-6.5e-06	17.5874	-9.1e-05
15840	705	E69Q	370	$OZ$3	211	17.6246	-0.00016471	17.6246	-0.00018078	17.6246	-7.11e-05	17.6246	-6.18e-05	17.6246	3.447490276729326e-05	17.6246	6.129853605691023e-06	17.6246	-9.89e-05	17.6246	-9.12e-05	17.6246	2.711349850173213e-05	17.6246	-1.75e-05	17.6246	9.364969202743656e-05	17.6246	-1.88e-05	17.6246	-5.24e-05	17.6246	-0.000156224	17.6246	-8.4e-05	17.6246	-0.0001079	17.6246	0.000131646	17.6246	7.004449080866802e-05	17.6246	-0.000370422	17.6246	-0.000315645	17.6246	-2.15e-05	17.6246	-5.12e-05
15841	740	E69Q	370	$PB$3	212	17.6641	-0.000203108	17.6641	-0.000198227	17.6641	-0.000100933	17.6641	-0.000107479	17.6641	2.2079742500085223e-05	17.6641	9.284052055967204e-06	17.6641	-9.56e-06	17.6641	-2.05e-05	17.6641	4.875400512920221e-05	17.6641	-2.65e-05	17.6641	-4.52e-05	17.6641	-4.27e-05	17.6641	-0.000119681	17.6641	-0.00017924	17.6641	0.000100688	17.6641	-4.19e-06	17.6641	4.698235249705595e-06	17.6641	-1.85e-05	17.6641	-0.00036966	17.6641	-0.000271801	17.6641	-0.000114093	17.6641	-0.000104851
15842	705	E69Q	370	$PD$3	213	17.7062	-0.000135126	17.7062	-0.000194009	17.7062	2.1314737863418944e-05	17.7062	-1.13e-05	17.7062	6.063802755333636e-05	17.7062	-1.7e-05	17.7062	-5.14e-05	17.7062	-2.95e-05	17.7062	3.8914556815314695e-05	17.7062	-2.56e-05	17.7062	-8.92e-05	17.7062	-4.44e-05	17.7062	-0.000139634	17.7062	-0.000172604	17.7062	-3.51e-06	17.7062	1.845081391384229e-05	17.7062	7.11121381519581e-05	17.7062	8.696044396952138e-06	17.7062	-0.000279372	17.7062	-0.000215972	17.7062	-7.91e-05	17.7062	-8.25e-05
15843	740	E69Q	370	$PF$3	214	17.7508	-0.000149442	17.7508	-0.000184014	17.7508	8.049054957108689e-05	17.7508	-1.92e-05	17.7508	7.804183967639877e-06	17.7508	-9.78e-05	17.7508	1.971072753224846e-05	17.7508	-7.59e-06	17.7508	-2.64e-05	17.7508	-2.29e-05	17.7508	-4.91e-05	17.7508	-3.86e-05	17.7508	-2.73e-05	17.7508	-0.000156454	17.7508	-4.96e-05	17.7508	-1.74e-05	17.7508	6.28774575526206e-05	17.7508	2.0525876312748464e-05	17.7508	-0.000321416	17.7508	-0.000230269	17.7508	-0.000135357	17.7508	-0.000105616
15844	705	E69Q	370	$PH$3	215	17.7983	-4.22e-05	17.7983	-0.000192245	17.7983	-4.19e-05	17.7983	-6.83e-05	17.7983	-1.71e-05	17.7983	-4.74e-05	17.7983	-5.05e-05	17.7983	-7.95e-05	17.7983	-3.86e-05	17.7983	-0.000111565	17.7983	3.073803857993329e-06	17.7983	-2.28e-05	17.7983	-7.23e-06	17.7983	-4.6e-05	17.7983	7.195043591688298e-05	17.7983	-1.87e-05	17.7983	-4.93e-05	17.7983	-6.65e-05	17.7983	-0.000353494	17.7983	-0.000270106	17.7983	-3.79e-05	17.7983	-4.66e-05
15845	740	E69Q	370	$PJ$3	216	17.8488	-0.00014695	17.8488	-0.000205172	17.8488	1.1270190326807556e-05	17.8488	-4.9e-05	17.8488	-2.75e-05	17.8488	-9.14e-05	17.8488	-7.5e-05	17.8488	-0.00013019	17.8488	2.098056551949612e-05	17.8488	-6.5e-05	17.8488	-6.99e-05	17.8488	-4.55e-05	17.8488	2.196189429677555e-05	17.8488	-7.54e-05	17.8488	8.888160334241061e-05	17.8488	2.877710467317357e-05	17.8488	5.262114728271823e-06	17.8488	2.7426544839696462e-05	17.8488	-0.000414105	17.8488	-0.000331054	17.8488	-8.04e-05	17.8488	-8.07e-05
15846	705	E69Q	370	$PL$3	217	17.9025	-0.00011055	17.9025	-0.000127013	17.9025	3.969423479982439e-05	17.9025	-3.6e-05	17.9025	-2.37e-05	17.9025	-6.07e-05	17.9025	1.091573701449155e-05	17.9025	-8.55e-05	17.9025	-4.93e-05	17.9025	-5.99e-05	17.9025	1.3388303612645036e-05	17.9025	1.2919932407262635e-07	17.9025	-8.48e-05	17.9025	-0.000167533	17.9025	3.60983009694909e-05	17.9025	3.602559779068183e-05	17.9025	-6.43e-05	17.9025	-3.92e-05	17.9025	-0.000279238	17.9025	-0.000261565	17.9025	2.1379112922228615e-05	17.9025	-7.47e-06
15847	740	E69Q	370	$PN$3	218	17.9595	-0.000118152	17.9595	-0.00015917	17.9595	6.3655228265701615e-06	17.9595	-2.37e-05	17.9595	-3.59e-05	17.9595	-6.97e-05	17.9595	-6.82e-05	17.9595	-5.04e-05	17.9595	0.000105931	17.9595	-5.61e-07	17.9595	2.342148283437928e-05	17.9595	-1.75e-05	17.9595	-0.000106781	17.9595	-0.000202962	17.9595	-6.1e-05	17.9595	-8.34e-05	17.9595	7.782769441192503e-05	17.9595	3.288759851357778e-05	17.9595	-0.000289654	17.9595	-0.000245427	17.9595	-8.78e-05	17.9595	-2.68e-05
15848	705	E69Q	370	$PP$3	219	18.0202	-0.000273855	18.0202	-0.000210109	18.0202	3.392003045409693e-05	18.0202	-4.44e-05	18.0202	-5.43e-05	18.0202	-6.37e-05	18.0202	-4.89e-05	18.0202	-8.5e-05	18.0202	4.228963162410506e-05	18.0202	-3.22e-05	18.0202	2.9400209409155553e-06	18.0202	-9.82e-06	18.0202	2.3100620675728552e-05	18.0202	-8.41e-05	18.0202	-7.14e-05	18.0202	-4.88e-05	18.0202	8.035479150756211e-05	18.0202	-2.22e-05	18.0202	-0.00033816	18.0202	-0.000265484	18.0202	-7.85e-05	18.0202	-4.27e-05
15849	740	E69Q	370	$PR$3	220	18.0846	-0.000314018	18.0846	-0.000241038	18.0846	-0.000131138	18.0846	-9.69e-05	18.0846	-3.27e-05	18.0846	-3.89e-05	18.0846	-1.81e-06	18.0846	-7.59e-05	18.0846	1.1839853143282616e-06	18.0846	-3.81e-05	18.0846	-4.03e-05	18.0846	-2.71e-05	18.0846	2.1916736539275613e-05	18.0846	-6.55e-05	18.0846	-1.52e-05	18.0846	-3.51e-05	18.0846	2.3155826748136928e-05	18.0846	2.8330305755303042e-05	18.0846	-0.000327919	18.0846	-0.000321882	18.0846	-0.000114179	18.0846	-4.63e-05
0	#VALUE!	#N/A	#N/A	#N/A	221	18.1531	-0.000175043	18.1531	-0.000181474	18.1531	-7.69e-05	18.1531	-2.82e-05	18.1531	6.106419010815187e-05	18.1531	-7.23e-05	18.1531	-4.77e-05	18.1531	-1.98e-05	18.1531	-7.24e-05	18.1531	-3.65e-05	18.1531	4.1223977761850605e-05	18.1531	7.891534744564055e-07	18.1531	-0.000160788	18.1531	-0.000237638	18.1531	1.6440512536233017e-05	18.1531	-5.53e-05	18.1531	-4.17e-05	18.1531	-2.26e-05	18.1531	-0.000498886	18.1531	-0.000368009	18.1531	-6.5e-05	18.1531	-3.7e-05
0	#VALUE!	#N/A	#N/A	#N/A	222	18.226	-0.000226212	18.226	-0.000242197	18.226	-1.75e-05	18.226	-6.12e-05	18.226	-5.08e-05	18.226	-4.55e-05	18.226	6.645797412174379e-05	18.226	-8.86e-05	18.226	-8.19e-05	18.226	-9e-05	18.226	5.067633357501433e-05	18.226	9.24726927514774e-06	18.226	-2.79e-05	18.226	-9.48e-05	18.226	8.188673634357637e-05	18.226	1.178638985747417e-05	18.226	0.000138713	18.226	2.459916487432441e-05	18.226	-0.000461321	18.226	-0.000366631	18.226	-5.07e-05	18.226	-6.22e-05
15850	705	WT	371	$PX$3	223	18.3034	-0.000187145	18.3034	-0.000221035	18.3034	-3.02e-05	18.3034	-4.18e-05	18.3034	-9.89e-05	18.3034	-7.49e-05	18.3034	-5.65e-05	18.3034	-7.61e-05	18.3034	1.644705738900582e-05	18.3034	-8.34e-05	18.3034	-6.74e-06	18.3034	-7.01e-06	18.3034	-0.00012226	18.3034	-0.000152671	18.3034	-9.18e-06	18.3034	-7.36e-06	18.3034	8.800084424414201e-05	18.3034	4.2397802582607585e-05	18.3034	-0.000416713	18.3034	-0.000328704	18.3034	-0.000111762	18.3034	-3.34e-05
15851	740	WT	371	$PZ$3	224	18.3857	-0.000246991	18.3857	-0.000229705	18.3857	-2.46e-05	18.3857	-2.92e-05	18.3857	3.491129663173815e-05	18.3857	-9.12e-05	18.3857	7.92126980110261e-06	18.3857	-1.98e-06	18.3857	-4.31e-05	18.3857	-3.95e-05	18.3857	5.184600015128993e-05	18.3857	7.271752954340904e-06	18.3857	-6.85e-05	18.3857	-0.000168153	18.3857	4.0345010121415866e-05	18.3857	-1.06e-05	18.3857	1.3846812366545645e-05	18.3857	-7.2e-06	18.3857	-0.000449076	18.3857	-0.000374146	18.3857	-8.32e-05	18.3857	-6.74e-05
15852	705	WT	371	$QB$3	225	18.4732	-0.000234978	18.4732	-0.000227435	18.4732	2.492171922938071e-05	18.4732	-2.71e-05	18.4732	1.624387838108617e-05	18.4732	-3.1e-05	18.4732	3.454854742635568e-07	18.4732	-7.04e-05	18.4732	-6.79e-05	18.4732	-9.61e-05	18.4732	3.0544474596667925e-05	18.4732	-2.59e-06	18.4732	-1.23e-05	18.4732	-0.000140427	18.4732	5.89889475769692e-05	18.4732	3.520841765163214e-05	18.4732	7.114156760887032e-05	18.4732	6.598889342282824e-05	18.4732	-0.000477154	18.4732	-0.000356847	18.4732	-2.71e-05	18.4732	-9.35e-05
15853	740	WT	371	$QD$3	226	18.5663	-0.000346225	18.5663	-0.000300593	18.5663	-0.000157416	18.5663	-9.62e-05	18.5663	-8.77e-05	18.5663	-6.51e-05	18.5663	-7.87e-05	18.5663	-8.49e-05	18.5663	-4.06e-06	18.5663	-6.16e-05	18.5663	3.765521362953522e-05	18.5663	2.763578641362674e-05	18.5663	-6.79e-05	18.5663	-0.00011253	18.5663	-7e-06	18.5663	3.5549446161329407e-06	18.5663	-7.03e-06	18.5663	1.6777605606419985e-05	18.5663	-0.000403744	18.5663	-0.000344536	18.5663	-9.92e-05	18.5663	5.644702881873326e-06
15854	705	WT	371	$QF$3	227	18.6651	-0.000349109	18.6651	-0.000307019	18.6651	-2.92e-05	18.6651	-5.59e-05	18.6651	-0.000128731	18.6651	-0.000101886	18.6651	-0.00013761	18.6651	-0.000123574	18.6651	-4.04e-05	18.6651	-4.12e-05	18.6651	-4.18e-05	18.6651	-1.85e-05	18.6651	8.705704884287352e-05	18.6651	-0.000111952	18.6651	0.000142747	18.6651	0.000105645	18.6651	4.462007096034653e-05	18.6651	0.000118015	18.6651	-0.000518308	18.6651	-0.000364669	18.6651	-8.61e-05	18.6651	-0.00011665
15855	740	WT	371	$QH$3	228	18.7703	-0.000380363	18.7703	-0.000330758	18.7703	-0.000108565	18.7703	-6.07e-05	18.7703	-8.48e-05	18.7703	-1.95e-05	18.7703	-2.92e-05	18.7703	-6.08e-05	18.7703	1.597029743098384e-05	18.7703	-2.41e-05	18.7703	8.45914552302443e-05	18.7703	2.8496894620977375e-05	18.7703	-8.43e-05	18.7703	-0.000174542	18.7703	2.1412649713534442e-06	18.7703	1.9946313789456077e-05	18.7703	-6.87e-05	18.7703	-3.95e-05	18.7703	-0.000496599	18.7703	-0.000398612	18.7703	-2.78e-05	18.7703	1.868712142343021e-05
15856	705	WT	371	$QJ$3	229	18.882	-0.000317043	18.882	-0.000323702	18.882	-2.57e-05	18.882	-9.58e-06	18.882	-4.48e-05	18.882	-2.03e-05	18.882	-9.77e-07	18.882	-1.2e-05	18.882	-4.3e-05	18.882	-5.52e-05	18.882	3.214360044413028e-05	18.882	-1.73e-05	18.882	-9.14e-05	18.882	-0.000178423	18.882	4.7892544683706025e-05	18.882	-3.2e-06	18.882	0.000124096	18.882	4.636337647686423e-06	18.882	-0.000552659	18.882	-0.000412049	18.882	-5.68e-05	18.882	-3.18e-05
15857	740	WT	371	$QL$3	230	19.0008	-0.00028386	19.0008	-0.000287734	19.0008	-2.07e-05	19.0008	-7.96e-05	19.0008	-0.000136276	19.0008	-8.16e-05	19.0008	-0.00011468	19.0008	-0.00010185	19.0008	-3.81e-05	19.0008	-5.49e-05	19.0008	9.970220563364218e-06	19.0008	-1.54e-05	19.0008	-5.98e-05	19.0008	-0.000187444	19.0008	8.152561288855462e-05	19.0008	5.365544748238242e-05	19.0008	4.7886531042346404e-05	19.0008	3.4099807263932025e-05	19.0008	-0.000663675	19.0008	-0.000480234	19.0008	-8.3e-05	19.0008	-2.02e-05
15858	705	WT	371	$QN$3	231	19.1271	-0.000244072	19.1271	-0.000319946	19.1271	-1.42e-05	19.1271	-2.37e-05	19.1271	1.607437713538112e-05	19.1271	2.0757947579728812e-05	19.1271	-8.68e-06	19.1271	-8.95e-05	19.1271	4.2339759650786464e-05	19.1271	-3.79e-05	19.1271	-6.18e-05	19.1271	1.9150289625069483e-05	19.1271	-5.7e-05	19.1271	-0.000157461	19.1271	8.272696565358876e-05	19.1271	4.660976294156016e-05	19.1271	-4.23e-05	19.1271	5.547230346909793e-06	19.1271	-0.000596486	19.1271	-0.000446587	19.1271	-0.000162381	19.1271	-0.000134497
15859	740	WT	371	$QP$3	232	19.2613	-0.00029816	19.2613	-0.000317961	19.2613	-3.82e-05	19.2613	-3.72e-05	19.2613	3.6573478522424624e-06	19.2613	-3.87e-05	19.2613	-7.5e-05	19.2613	-6.98e-05	19.2613	1.7474096126100964e-05	19.2613	-1.36e-05	19.2613	9.748139433277819e-05	19.2613	4.286470847120194e-05	19.2613	-0.000157839	19.2613	-0.000229364	19.2613	0.000145247	19.2613	0.000113421	19.2613	3.983559105844416e-05	19.2613	1.965808870315819e-05	19.2613	-0.00061979	19.2613	-0.000484624	19.2613	-9.55e-05	19.2613	-4.56e-05
15860	705	WT	371	$QR$3	233	19.404	-0.000275457	19.404	-0.000270669	19.404	-6.44e-06	19.404	-2.57e-05	19.404	-1.76e-06	19.404	-5.3e-05	19.404	-8.9e-05	19.404	-9.48e-05	19.404	-2.47e-05	19.404	-9.63e-05	19.404	-8.1e-05	19.404	-4.74e-05	19.404	-0.000152439	19.404	-0.000200678	19.404	-4.47e-05	19.404	2.9984690578290993e-05	19.404	0.000107051	19.404	8.265700782250814e-05	19.404	-0.000555656	19.404	-0.000463447	19.404	-0.000214544	19.404	-0.000132847
15861	740	WT	371	$QT$3	234	19.5556	-0.000346405	19.5556	-0.000309865	19.5556	-0.000112735	19.5556	-9.66e-05	19.5556	1.3993455344877594e-05	19.5556	-4.54e-05	19.5556	-0.000149773	19.5556	-0.000136054	19.5556	-4.3e-06	19.5556	-5.89e-05	19.5556	-8.74e-05	19.5556	-2.55e-05	19.5556	-0.000193969	19.5556	-0.000197913	19.5556	-2.64e-05	19.5556	-3.8e-05	19.5556	0.000127717	19.5556	6.441552390355418e-05	19.5556	-0.000719494	19.5556	-0.00051458	19.5556	-0.000176945	19.5556	-9.7e-05
15862	705	WT	371	$QV$3	235	19.7169	-0.000323918	19.7169	-0.000289836	19.7169	-0.000103374	19.7169	-6.75e-05	19.7169	-3.81e-05	19.7169	-2.38e-05	19.7169	-2.8e-05	19.7169	-5.87e-05	19.7169	-0.000124254	19.7169	-5.82e-05	19.7169	3.138742545101547e-06	19.7169	3.5530941406791694e-05	19.7169	-9e-05	19.7169	-0.000182207	19.7169	4.55425653765832e-05	19.7169	2.8175128316196285e-07	19.7169	9.537212914040132e-05	19.7169	4.0334077160133694e-05	19.7169	-0.000672986	19.7169	-0.000484338	19.7169	-0.000124884	19.7169	-5.27e-05
15863	740	WT	371	$QX$3	236	19.8883	-0.000398228	19.8883	-0.000389571	19.8883	1.4232232252566878e-05	19.8883	2.3868012144758963e-05	19.8883	6.180923342154199e-05	19.8883	-2.47e-05	19.8883	-6.73e-05	19.8883	-3.32e-05	19.8883	-2.19e-05	19.8883	-4.27e-05	19.8883	0.000148581	19.8883	6.36076955866649e-05	19.8883	-0.000188716	19.8883	-0.000205997	19.8883	4.4408878961822934e-05	19.8883	7.45206465957958e-05	19.8883	2.6324654431733076e-05	19.8883	4.951235633145201e-05	19.8883	-0.000724989	19.8883	-0.000504147	19.8883	-5.21e-05	19.8883	-5.73e-05
15866	705	WT	371	$QZ$3	237	20.0705	-0.000360194	20.0705	-0.000315628	20.0705	1.030602260852255e-06	20.0705	-7.73e-05	20.0705	1.727830047928286e-05	20.0705	8.419771215809058e-06	20.0705	-1.54e-05	20.0705	-5.87e-05	20.0705	3.573916949350074e-05	20.0705	-1.56e-05	20.0705	-3.8e-05	20.0705	3.180736677388385e-05	20.0705	-8.92e-05	20.0705	-0.00019028	20.0705	9.52290757935579e-05	20.0705	9.255173035074317e-05	20.0705	-4.63e-05	20.0705	4.1458277847563826e-05	20.0705	-0.000721799	20.0705	-0.000498428	20.0705	-2.83e-05	20.0705	-2.18e-05
15867	740	WT	371	$RB$3	238	20.2642	-0.000421222	20.2642	-0.000400192	20.2642	-2.17e-05	20.2642	-3.21e-06	20.2642	-4.39e-05	20.2642	-7.81e-05	20.2642	-0.000160186	20.2642	-0.000177984	20.2642	-3.47e-05	20.2642	-6.06e-05	20.2642	-5.2e-06	20.2642	1.3055399476380458e-05	20.2642	-0.000173483	20.2642	-0.000203319	20.2642	8.653741788733067e-05	20.2642	7.556975696363342e-05	20.2642	7.586766775498962e-06	20.2642	4.2655128174300116e-05	20.2642	-0.000733153	20.2642	-0.000546052	20.2642	-0.000174505	20.2642	-0.0001255
15868	705	WT	371	$RD$3	239	20.4701	-0.000452573	20.4701	-0.000357812	20.4701	-4.34e-05	20.4701	6.400496657860827e-06	20.4701	-5.4e-06	20.4701	-7.73e-05	20.4701	-4.17e-05	20.4701	-7.18e-05	20.4701	-0.000122084	20.4701	-7.52e-05	20.4701	0.000114391	20.4701	3.893827887185841e-05	20.4701	-0.000206038	20.4701	-0.000233157	20.4701	7.327165041150913e-05	20.4701	5.183816313325887e-05	20.4701	0.000108161	20.4701	4.602148714361043e-05	20.4701	-0.000862544	20.4701	-0.000600508	20.4701	-8.84e-05	20.4701	-4.85e-05
15869	740	WT	371	$RF$3	240	20.6889	-0.000531601	20.6889	-0.000511882	20.6889	-5.4e-05	20.6889	-0.000113277	20.6889	4.3818063328698344e-05	20.6889	1.1020525858326108e-05	20.6889	-8.2e-05	20.6889	-8.03e-05	20.6889	-1.75e-05	20.6889	-9.95e-05	20.6889	8.166607739314158e-05	20.6889	6.09339410557741e-05	20.6889	-0.000154307	20.6889	-0.000183227	20.6889	0.000122826	20.6889	0.000100724	20.6889	-1.12e-05	20.6889	2.125503690041282e-05	20.6889	-0.000884476	20.6889	-0.00059865	20.6889	-5.94e-05	20.6889	-5.54e-05
15910	705	R66Q	374	$RH$3	241	20.9216	-0.000626671	20.9216	-0.000467227	20.9216	-0.000161806	20.9216	-5.93e-05	20.9216	6.850838326472302e-05	20.9216	5.200952220230093e-06	20.9216	-0.000124593	20.9216	-0.000118693	20.9216	-0.000111099	20.9216	-8.77e-05	20.9216	1.6720490850538616e-05	20.9216	4.074303404538737e-05	20.9216	-0.000181159	20.9216	-0.000191808	20.9216	0.000119032	20.9216	9.093969163997094e-05	20.9216	5.987939250945125e-05	20.9216	7.17124120774449e-05	20.9216	-0.000995303	20.9216	-0.000751145	20.9216	-7.29e-05	20.9216	-4.05e-05
15911	740	R66Q	374	$RJ$3	242	21.1689	-0.000585124	21.1689	-0.000498815	21.1689	-0.000129175	21.1689	-7.9e-05	21.1689	6.691269007420191e-05	21.1689	7.975182077317976e-05	21.1689	1.7321020031709844e-05	21.1689	-9.11e-05	21.1689	8.420230735228904e-05	21.1689	3.431999480345803e-05	21.1689	0.000115325	21.1689	3.516129791819589e-05	21.1689	-0.000258248	21.1689	-0.000291119	21.1689	0.000104099	21.1689	7.731391371298448e-05	21.1689	-3.6e-05	21.1689	-3.89e-05	21.1689	-0.00105255	21.1689	-0.000794385	21.1689	-4.76e-05	21.1689	-4.13e-05
15912	705	R66Q	374	$RL$3	243	21.4318	-0.000601085	21.4318	-0.000476142	21.4318	-0.000119582	21.4318	-6.87e-05	21.4318	-5.31e-05	21.4318	-3.25e-05	21.4318	-9.64e-05	21.4318	-0.000133321	21.4318	-0.000140553	21.4318	-9.76e-05	21.4318	0.000152248	21.4318	6.184005147152893e-05	21.4318	-0.000142008	21.4318	-0.000295455	21.4318	0.000175684	21.4318	8.83810207258761e-05	21.4318	0.000128356	21.4318	9.588014536270929e-05	21.4318	-0.00102912	21.4318	-0.000724445	21.4318	-0.000196729	21.4318	-4.42e-05
15913	740	R66Q	374	$RN$3	244	21.7113	-0.000640424	21.7113	-0.000598022	21.7113	-0.000208039	21.7113	-0.000127092	21.7113	3.745771719489881e-05	21.7113	1.5120373845502709e-05	21.7113	-0.000133972	21.7113	-0.000135916	21.7113	-0.00010471	21.7113	-0.000125586	21.7113	2.6579800028576905e-05	21.7113	2.327277679026185e-05	21.7113	-0.000165079	21.7113	-0.000245859	21.7113	8.150752536161942e-05	21.7113	6.944807566574944e-05	21.7113	6.194599047025994e-05	21.7113	9.05147502264312e-05	21.7113	-0.00111541	21.7113	-0.000776494	21.7113	-0.000201052	21.7113	-3.08e-05
15914	705	R66Q	374	$RP$3	245	22.0084	-0.000620923	22.0084	-0.000556033	22.0084	-0.000123797	22.0084	-6.56e-05	22.0084	3.0184030824242838e-05	22.0084	-3.53e-05	22.0084	2.336204888923909e-05	22.0084	-8.52e-05	22.0084	6.876480573691579e-06	22.0084	-8.57e-05	22.0084	-4.76e-05	22.0084	1.9219700441441834e-05	22.0084	-0.000182848	22.0084	-0.000258374	22.0084	6.718424417079521e-05	22.0084	4.432414002306269e-05	22.0084	5.882306976946533e-05	22.0084	7.631335010801175e-05	22.0084	-0.00106653	22.0084	-0.000812813	22.0084	-0.000116434	22.0084	-7.08e-05
15915	740	R66Q	374	$RR$3	246	32.0586	-0.00136279	32.0586	-0.00133662	32.0586	-0.000314716	32.0586	-0.000305102	32.0586	6.830001292548911e-05	32.0586	2.1753701786724443e-05	32.0586	-7.47e-06	32.0586	-0.000254555	32.0586	0.000165389	32.0586	2.8325401570434075e-05	32.0586	0.000245732	32.0586	0.000154896	32.0586	-0.000254887	32.0586	-0.000364429	32.0586	0.000197615	32.0586	0.000132638	32.0586	0.000135074	32.0586	0.000139698	32.0586	-0.00272689	32.0586	-0.00210363	32.0586	-0.000180874	32.0586	-0.000145474
15916	705	R66Q	374	$RT$3	247	32.1088	-0.00151153	32.1088	-0.00142366	32.1088	-0.00032487	32.1088	-0.000275338	32.1088	1.8963639279695032e-05	32.1088	-4.72e-05	32.1088	-0.000110313	32.1088	-0.000256377	32.1088	9.480655162915404e-05	32.1088	-2.4e-05	32.1088	0.000194376	32.1088	0.000111732	32.1088	-0.000383629	32.1088	-0.000444383	32.1088	0.000154139	32.1088	0.000140262	32.1088	4.134791023978259e-05	32.1088	4.3199614299731584e-05	32.1088	-0.00281851	32.1088	-0.00213148	32.1088	-0.000296993	32.1088	-0.0001695
15917	740	R66Q	374	$RV$3	248	32.159	-0.00156706	32.159	-0.00147874	32.159	-0.000500049	32.159	-0.000397894	32.159	-7.24e-05	32.159	-8.82e-05	32.159	-0.000172383	32.159	-0.000331438	32.159	-3.45e-05	32.159	-0.000106948	32.159	3.4777624534271245e-05	32.159	4.1677066650480654e-05	32.159	-0.000354157	32.159	-0.000429287	32.159	7.920081297529079e-05	32.159	0.000117186	32.159	-6.12e-05	32.159	2.0158044675713804e-05	32.159	-0.00293702	32.159	-0.00221004	32.159	-0.000430295	32.159	-0.000299618
15918	705	R66Q	374	$RX$3	249	32.2092	-0.00161205	32.2092	-0.00152758	32.2092	-0.000460001	32.2092	-0.000305817	32.2092	-4.71e-05	32.2092	-7.66e-05	32.2092	-0.000324485	32.2092	-0.000473221	32.2092	-7.45e-05	32.2092	-0.000114957	32.2092	0.000147817	32.2092	5.8508206149721076e-05	32.2092	-0.000377255	32.2092	-0.000448102	32.2092	0.000108505	32.2092	6.836878412093406e-05	32.2092	-0.000129245	32.2092	-1.62e-05	32.2092	-0.00299583	32.2092	-0.00236437	32.2092	-0.000290109	32.2092	-0.000261675
15919	740	R66Q	374	$RZ$3	250	32.2594	-0.00166684	32.2594	-0.00154292	32.2594	-0.000532362	32.2594	-0.000429456	32.2594	-2.6e-05	32.2594	-5.75e-05	32.2594	-0.000277466	32.2594	-0.000356524	32.2594	-8.38e-05	32.2594	-0.000171889	32.2594	6.902571962520698e-05	32.2594	3.074453657198051e-05	32.2594	-0.000322771	32.2594	-0.000459356	32.2594	7.945214848739581e-05	32.2594	2.5379009480191658e-05	32.2594	-0.000216508	32.2594	-0.000123626	32.2594	-0.00304303	32.2594	-0.00227273	32.2594	-0.000358676	32.2594	-0.000281999
15920	705	R66Q	374	$SB$3	251	32.3096	-0.00152893	32.3096	-0.00160325	32.3096	-0.000482566	32.3096	-0.000380346	32.3096	-5.68e-05	32.3096	-0.000187033	32.3096	-0.000375324	32.3096	-0.000508603	32.3096	-0.000151575	32.3096	-0.000181597	32.3096	6.225377286328548e-05	32.3096	8.884146221743716e-06	32.3096	-0.000404378	32.3096	-0.000458998	32.3096	-7e-05	32.3096	-3.06e-05	32.3096	-0.000182847	32.3096	-8.84e-05	32.3096	-0.00297562	32.3096	-0.0023125	32.3096	-0.000442458	32.3096	-0.000364729
15921	740	R66Q	374	$SD$3	252	32.3598	-0.00159292	32.3598	-0.00149431	32.3598	-0.000479774	32.3598	-0.000385391	32.3598	-0.00011368	32.3598	-0.000156936	32.3598	-0.000390708	32.3598	-0.000457137	32.3598	-0.000104627	32.3598	-0.000150343	32.3598	8.408164873234536e-05	32.3598	3.9170441308744586e-05	32.3598	-0.000552989	32.3598	-0.000576417	32.3598	4.4277944393537015e-06	32.3598	1.411350233498053e-05	32.3598	-0.000113389	32.3598	-0.000115248	32.3598	-0.00307227	32.3598	-0.00229329	32.3598	-0.000519332	32.3598	-0.000364617
15922	705	R66Q	374	$SF$3	253	32.4101	-0.00173674	32.4101	-0.00158549	32.4101	-0.00047249	32.4101	-0.000434799	32.4101	-3.66e-05	32.4101	-7.16e-05	32.4101	-0.000347567	32.4101	-0.000445364	32.4101	-9.89e-05	32.4101	-9.8e-05	32.4101	0.000105659	32.4101	-8.06e-06	32.4101	-0.000502498	32.4101	-0.000592731	32.4101	7.27508710755458e-05	32.4101	3.510359417385929e-05	32.4101	-0.000201924	32.4101	-0.00010488	32.4101	-0.00309056	32.4101	-0.00232561	32.4101	-0.000491115	32.4101	-0.000335465
15923	740	R66Q	374	$SH$3	254	32.4603	-0.00167586	32.4603	-0.00161861	32.4603	-0.000473627	32.4603	-0.000400721	32.4603	-2.98e-05	32.4603	-5.94e-05	32.4603	-0.000428229	32.4603	-0.000523173	32.4603	-7.44e-05	32.4603	-0.000168575	32.4603	-6.25e-05	32.4603	-2.57e-05	32.4603	-0.000490088	32.4603	-0.000550989	32.4603	-0.00016387	32.4603	-9.92e-05	32.4603	-0.000212369	32.4603	-6.82e-05	32.4603	-0.00308202	32.4603	-0.00229634	32.4603	-0.000436581	32.4603	-0.000313743
15924	705	R66Q	374	$SJ$3	255	32.5105	-0.00170053	32.5105	-0.00163627	32.5105	-0.000622556	32.5105	-0.000524039	32.5105	-0.000139483	32.5105	-0.000119535	32.5105	-0.000399679	32.5105	-0.000488501	32.5105	-0.000103199	32.5105	-0.000194445	32.5105	2.368769791856462e-05	32.5105	-2.37e-05	32.5105	-0.000421054	32.5105	-0.000536351	32.5105	-4.8e-05	32.5105	-2.22e-05	32.5105	-0.00020295	32.5105	-0.000175432	32.5105	-0.00312427	32.5105	-0.00231551	32.5105	-0.000544608	32.5105	-0.000336769
15925	740	R66Q	374	$SL$3	256	32.5607	-0.00167365	32.5607	-0.00154898	32.5607	-0.000457935	32.5607	-0.000454371	32.5607	-0.000196611	32.5607	-0.00018416	32.5607	-0.000315741	32.5607	-0.00047968	32.5607	-7.78e-05	32.5607	-0.000131708	32.5607	2.4406249248355716e-05	32.5607	-2.11e-05	32.5607	-0.000592755	32.5607	-0.000620736	32.5607	-0.0001065	32.5607	-0.000120305	32.5607	-0.000197495	32.5607	-0.000196811	32.5607	-0.00321563	32.5607	-0.00239403	32.5607	-0.000572939	32.5607	-0.000460723
15926	705	R66Q	374	$SN$3	257	32.6109	-0.00164316	32.6109	-0.00160939	32.6109	-0.000506815	32.6109	-0.00046975	32.6109	-0.000103993	32.6109	-0.000112272	32.6109	-0.000333169	32.6109	-0.000486037	32.6109	-0.000127047	32.6109	-0.000162886	32.6109	-5.25e-05	32.6109	-3.98e-05	32.6109	-0.000533408	32.6109	-0.000658459	32.6109	-2.76e-06	32.6109	-4.3e-05	32.6109	-0.000202943	32.6109	-0.000160746	32.6109	-0.00310785	32.6109	-0.00236561	32.6109	-0.000592781	32.6109	-0.000499574
15927	740	R66Q	374	$SP$3	258	32.6611	-0.00171352	32.6611	-0.00153579	32.6611	-0.000548569	32.6611	-0.000455833	32.6611	-0.000100384	32.6611	-0.000134554	32.6611	-0.000396398	32.6611	-0.000428276	32.6611	-0.000140494	32.6611	-0.00017879	32.6611	-3.28e-05	32.6611	-4.08e-05	32.6611	-0.000460383	32.6611	-0.000566701	32.6611	-3.66e-05	32.6611	-8.11e-05	32.6611	-0.00016448	32.6611	-0.000172572	32.6611	-0.00314781	32.6611	-0.00231452	32.6611	-0.000463533	32.6611	-0.000382194
15950	705	E69Q/E70Q	376	$SR$3	259	32.7113	-0.00176706	32.7113	-0.00165245	32.7113	-0.00063805	32.7113	-0.000536232	32.7113	-0.000130041	32.7113	-0.000143424	32.7113	-0.000334519	32.7113	-0.000464588	32.7113	-8.46e-05	32.7113	-0.000210469	32.7113	2.1508360584100716e-05	32.7113	-2.75e-05	32.7113	-0.000503112	32.7113	-0.000537264	32.7113	-0.000126248	32.7113	-7.67e-05	32.7113	-0.000246369	32.7113	-0.000190711	32.7113	-0.00315961	32.7113	-0.00236315	32.7113	-0.000507175	32.7113	-0.000367922
15951	740	E69Q/E70Q	376	$ST$3	260	32.7615	-0.00163799	32.7615	-0.00159387	32.7615	-0.000587278	32.7615	-0.000500006	32.7615	-0.000150699	32.7615	-0.000154255	32.7615	-0.000295522	32.7615	-0.00045451	32.7615	-3.18e-05	32.7615	-0.000109363	32.7615	4.133029978054675e-05	32.7615	5.68509815573881e-06	32.7615	-0.000464925	32.7615	-0.000585196	32.7615	-5.34e-05	32.7615	-2.75e-05	32.7615	-0.000263377	32.7615	-0.000163827	32.7615	-0.00311505	32.7615	-0.00237667	32.7615	-0.000500372	32.7615	-0.000387465
15952	705	E69Q/E70Q	376	$SV$3	261	32.8117	-0.00172242	32.8117	-0.00159923	32.8117	-0.000488795	32.8117	-0.000420737	32.8117	-0.000104537	32.8117	-0.000128379	32.8117	-0.000364332	32.8117	-0.000444011	32.8117	-5.11e-05	32.8117	-0.00013789	32.8117	4.676016853006476e-05	32.8117	-2.2e-05	32.8117	-0.000558296	32.8117	-0.000574198	32.8117	-0.000107284	32.8117	-6.63e-05	32.8117	-0.000270412	32.8117	-0.000177215	32.8117	-0.0031255	32.8117	-0.0023827	32.8117	-0.000480735	32.8117	-0.000370019
15953	740	E69Q/E70Q	376	$SX$3	262	32.8619	-0.0017109	32.8619	-0.00164458	32.8619	-0.000609406	32.8619	-0.000498347	32.8619	-0.000159439	32.8619	-0.000150234	32.8619	-0.000372356	32.8619	-0.000511796	32.8619	-0.00020164	32.8619	-0.000262305	32.8619	1.1374299985440761e-05	32.8619	-7.25e-06	32.8619	-0.000575332	32.8619	-0.000646525	32.8619	1.7923052202733223e-05	32.8619	-1.61e-05	32.8619	-0.000225517	32.8619	-0.0001371	32.8619	-0.00319519	32.8619	-0.00238054	32.8619	-0.000494339	32.8619	-0.000374251
15954	705	E69Q/E70Q	376	$SZ$3	263	32.9121	-0.00172789	32.9121	-0.00164825	32.9121	-0.000540251	32.9121	-0.00041932	32.9121	-0.00016175	32.9121	-0.000166109	32.9121	-0.000401515	32.9121	-0.000536391	32.9121	-0.000135228	32.9121	-0.000215014	32.9121	-3.06e-05	32.9121	3.813119315410063e-06	32.9121	-0.000565274	32.9121	-0.000581436	32.9121	4.154977240009299e-05	32.9121	-1.84e-05	32.9121	-0.000233802	32.9121	-0.000182312	32.9121	-0.00327136	32.9121	-0.00248714	32.9121	-0.000527241	32.9121	-0.000401418
15955	740	E69Q/E70Q	376	$TB$3	264	32.9623	-0.00184362	32.9623	-0.00169215	32.9623	-0.000512734	32.9623	-0.000448655	32.9623	-0.000200035	32.9623	-0.000205533	32.9623	-0.000305363	32.9623	-0.000448939	32.9623	-5.64e-05	32.9623	-0.000134491	32.9623	-1.5e-05	32.9623	-5.43e-05	32.9623	-0.000589886	32.9623	-0.000677404	32.9623	7.116610050477345e-05	32.9623	5.3418238372623245e-05	32.9623	-0.000262594	32.9623	-0.000172759	32.9623	-0.00329011	32.9623	-0.00248978	32.9623	-0.000521234	32.9623	-0.000371259
15958	705	E69Q/E70Q	376	$TD$3	265	33.0125	-0.00166867	33.0125	-0.00161482	33.0125	-0.000686534	33.0125	-0.000529688	33.0125	-0.000175319	33.0125	-0.000157107	33.0125	-0.000245248	33.0125	-0.000369996	33.0125	-0.000169702	33.0125	-0.000255732	33.0125	-1.13e-05	33.0125	1.0111285728198194e-05	33.0125	-0.000545769	33.0125	-0.000617731	33.0125	-0.000138415	33.0125	-0.00013298	33.0125	-0.000226889	33.0125	-0.000170078	33.0125	-0.00316842	33.0125	-0.00244441	33.0125	-0.000510103	33.0125	-0.00041658
15959	740	E69Q/E70Q	376	$TF$3	266	33.0133	-0.00823162	33.0133	-0.00165595	33.0133	-0.00716382	33.0133	-0.000595203	33.0133	-0.00643472	33.0133	-0.000136566	33.0133	-0.00674945	33.0133	-0.000502675	33.0133	-0.00647374	33.0133	-0.000129086	33.0133	-0.00660911	33.0133	-7.52e-06	33.0133	-0.00674781	33.0133	-0.000618596	33.0133	-0.00617269	33.0133	-0.00010497	33.0133	-0.00637482	33.0133	-0.00017596	33.0133	-0.00951903	33.0133	-0.00254097	33.0133	-0.00648328	33.0133	-0.000444064
15960	705	E69Q/E70Q	376	$TH$3	267	33.0141	-0.00795123	33.0141	-0.0013919	33.0141	-0.00680335	33.0141	-0.000226269	33.0141	-0.00628304	33.0141	7.555653709110169e-05	33.0141	-0.00645465	33.0141	-0.000263435	33.0141	-0.00626702	33.0141	-1.73e-05	33.0141	-0.00634908	33.0141	0.000111228	33.0141	-0.00637881	33.0141	-0.000363032	33.0141	-0.00573484	33.0141	0.000240585	33.0141	-0.00600898	33.0141	4.945935436301459e-05	33.0141	-0.00932772	33.0141	-0.00225996	33.0141	-0.00634492	33.0141	-0.000195254
15961	740	E69Q/E70Q	376	$TJ$3	268	33.0149	-0.00796023	33.0149	-0.00135728	33.0149	-0.0067618	33.0149	-0.000254263	33.0149	-0.00620455	33.0149	3.4587535237228656e-05	33.0149	-0.00641682	33.0149	-0.000277656	33.0149	-0.00604708	33.0149	8.446689760097971e-05	33.0149	-0.00609447	33.0149	0.000127087	33.0149	-0.00624081	33.0149	-0.000344196	33.0149	-0.00568075	33.0149	0.000161792	33.0149	-0.00587531	33.0149	-2.51e-05	33.0149	-0.00920743	33.0149	-0.00220609	33.0149	-0.00620078	33.0149	-0.000155977
15962	705	E69Q/E70Q	376	$TL$3	269	33.0157	-0.00796303	33.0157	-0.00139261	33.0157	-0.00664278	33.0157	-0.000220465	33.0157	-0.00615784	33.0157	2.3815444623650345e-06	33.0157	-0.006361	33.0157	-0.000308125	33.0157	-0.0059719	33.0157	2.9395045668248465e-05	33.0157	-0.00598637	33.0157	0.000126424	33.0157	-0.00607055	33.0157	-0.000419323	33.0157	-0.00544243	33.0157	0.000166702	33.0157	-0.00570541	33.0157	6.804820722988714e-06	33.0157	-0.009126	33.0157	-0.00223776	33.0157	-0.00610459	33.0157	-0.000158221
15963	740	E69Q/E70Q	376	$TN$3	270	33.0166	-0.00783555	33.0166	-0.00138707	33.0166	-0.00659659	33.0166	-0.000210075	33.0166	-0.0060608	33.0166	-1.81e-05	33.0166	-0.00618891	33.0166	-0.000271282	33.0166	-0.00576149	33.0166	5.8576671934507454e-05	33.0166	-0.00575774	33.0166	0.000111488	33.0166	-0.00597154	33.0166	-0.000445826	33.0166	-0.0053516	33.0166	0.000117499	33.0166	-0.00545493	33.0166	-2.04e-06	33.0166	-0.00911985	33.0166	-0.00223347	33.0166	-0.00601889	33.0166	-0.000147035
15964	705	E69Q/E70Q	376	$TP$3	271	33.0176	-0.00771154	33.0176	-0.00139391	33.0176	-0.00653062	33.0176	-0.000206883	33.0176	-0.00586899	33.0176	8.125058689244669e-05	33.0176	-0.00598158	33.0176	-0.000261897	33.0176	-0.00565665	33.0176	1.7200480492602505e-05	33.0176	-0.00559804	33.0176	0.000149192	33.0176	-0.005747	33.0176	-0.000366619	33.0176	-0.00497894	33.0176	0.000215595	33.0176	-0.00521228	33.0176	6.041069671707672e-06	33.0176	-0.00898095	33.0176	-0.00220722	33.0176	-0.00599187	33.0176	-0.000144257
15965	740	E69Q/E70Q	376	$TR$3	272	33.0186	-0.00771238	33.0186	-0.0014031	33.0186	-0.00644216	33.0186	-0.000282087	33.0186	-0.00570299	33.0186	6.830811837569423e-05	33.0186	-0.00587112	33.0186	-0.000263331	33.0186	-0.00557092	33.0186	-3.39e-05	33.0186	-0.00547522	33.0186	0.000114476	33.0186	-0.00555735	33.0186	-0.000423786	33.0186	-0.00480935	33.0186	0.00017946	33.0186	-0.00510304	33.0186	-5.79e-05	33.0186	-0.00880057	33.0186	-0.00217289	33.0186	-0.00585925	33.0186	-0.000187156
15966	705	E69Q/E70Q	376	$TT$3	273	33.0196	-0.00767935	33.0196	-0.00140829	33.0196	-0.00627658	33.0196	-0.000221602	33.0196	-0.00560814	33.0196	9.159515989864107e-05	33.0196	-0.00575277	33.0196	-0.000278801	33.0196	-0.00533172	33.0196	-1.45e-05	33.0196	-0.00523306	33.0196	0.000145307	33.0196	-0.00550016	33.0196	-0.000487429	33.0196	-0.00470972	33.0196	0.000171669	33.0196	-0.00473364	33.0196	3.8910628308401474e-05	33.0196	-0.00887481	33.0196	-0.00222713	33.0196	-0.00569769	33.0196	-0.000153104
15967	740	E69Q/E70Q	376	$TV$3	274	33.0208	-0.00764433	33.0208	-0.00148099	33.0208	-0.00621046	33.0208	-0.00025497	33.0208	-0.00554057	33.0208	6.29863483221308e-05	33.0208	-0.00564069	33.0208	-0.000331511	33.0208	-0.00514316	33.0208	-3.58e-05	33.0208	-0.00504326	33.0208	0.000110852	33.0208	-0.0051492	33.0208	-0.000409942	33.0208	-0.00445999	33.0208	0.00013833	33.0208	-0.00453333	33.0208	9.63999390265688e-06	33.0208	-0.00872873	33.0208	-0.00212177	33.0208	-0.00572797	33.0208	-0.0001865
15968	705	E69Q/E70Q	376	$TX$3	275	33.022	-0.00746264	33.022	-0.0014289	33.022	-0.00617492	33.022	-0.000250307	33.022	-0.00541177	33.022	6.967926807416747e-05	33.022	-0.00534982	33.022	-0.000277183	33.022	-0.0048707	33.022	9.816581760308148e-05	33.022	-0.00475362	33.022	0.000174967	33.022	-0.00487556	33.022	-0.000334259	33.022	-0.00428075	33.022	0.000175521	33.022	-0.00449873	33.022	-3.14e-05	33.022	-0.00867196	33.022	-0.00223409	33.022	-0.00553531	33.022	-0.000133915
15969	740	E69Q/E70Q	376	$TZ$3	276	33.0233	-0.0074325	33.0233	-0.00138126	33.0233	-0.00600371	33.0233	-0.000198489	33.0233	-0.00523238	33.0233	3.347128808985165e-05	33.0233	-0.00522575	33.0233	-0.000240864	33.0233	-0.00479252	33.0233	-1.41e-05	33.0233	-0.0045483	33.0233	0.000138294	33.0233	-0.00467043	33.0233	-0.000320644	33.0233	-0.00405435	33.0233	0.000209638	33.0233	-0.00414522	33.0233	6.441945887471733e-05	33.0233	-0.00851566	33.0233	-0.00216062	33.0233	-0.005395	33.0233	-5.99e-05
15970	705	E70Q	377	$UB$3	277	33.0247	-0.00727526	33.0247	-0.00136769	33.0247	-0.00593941	33.0247	-0.000232408	33.0247	-0.00520348	33.0247	3.271260779300414e-05	33.0247	-0.00508188	33.0247	-0.00019425	33.0247	-0.00469245	33.0247	3.705659365546218e-05	33.0247	-0.00444248	33.0247	0.000107967	33.0247	-0.00449578	33.0247	-0.000330354	33.0247	-0.00374806	33.0247	0.000222783	33.0247	-0.00396366	33.0247	5.077319494555324e-05	33.0247	-0.008478	33.0247	-0.00216567	33.0247	-0.00529107	33.0247	-0.000116108
15971	740	E70Q	377	$UD$3	278	33.0261	-0.00722266	33.0261	-0.00142372	33.0261	-0.00573854	33.0261	-0.000195204	33.0261	-0.00506721	33.0261	1.1915683879323326e-05	33.0261	-0.00494857	33.0261	-0.000340698	33.0261	-0.00442709	33.0261	3.932411412237505e-05	33.0261	-0.00422935	33.0261	0.000133723	33.0261	-0.00444506	33.0261	-0.000368774	33.0261	-0.0037392	33.0261	0.000147224	33.0261	-0.00384805	33.0261	-5.85e-05	33.0261	-0.00839724	33.0261	-0.00218766	33.0261	-0.00525387	33.0261	-0.000136368
15972	705	E70Q	377	$UF$3	279	33.0277	-0.00707635	33.0277	-0.00134987	33.0277	-0.00562203	33.0277	-0.000215477	33.0277	-0.00488667	33.0277	6.172610927603593e-05	33.0277	-0.00475309	33.0277	-0.000255887	33.0277	-0.00433334	33.0277	-2.4e-05	33.0277	-0.0040271	33.0277	0.000135175	33.0277	-0.00411608	33.0277	-0.000368712	33.0277	-0.00346804	33.0277	0.000171461	33.0277	-0.00352987	33.0277	7.19647810574868e-05	33.0277	-0.00830858	33.0277	-0.00216638	33.0277	-0.00510177	33.0277	-0.00011426
15973	740	E70Q	377	$UH$3	280	33.0293	-0.00691249	33.0293	-0.00135157	33.0293	-0.00543523	33.0293	-0.000140386	33.0293	-0.00459651	33.0293	0.000125313	33.0293	-0.00459708	33.0293	-0.00027877	33.0293	-0.00404489	33.0293	8.444364253605563e-05	33.0293	-0.00387273	33.0293	9.144028007479488e-05	33.0293	-0.00391389	33.0293	-0.000329866	33.0293	-0.00330504	33.0293	0.000209323	33.0293	-0.00342492	33.0293	-2.73e-05	33.0293	-0.00816752	33.0293	-0.00218289	33.0293	-0.00494765	33.0293	-0.000127765
15974	705	E70Q	377	$UJ$3	281	33.0311	-0.00682338	33.0311	-0.00130319	33.0311	-0.00548382	33.0311	-0.00027066	33.0311	-0.00451953	33.0311	4.736263733342693e-05	33.0311	-0.00439794	33.0311	-0.000199423	33.0311	-0.00386312	33.0311	5.120538446115076e-05	33.0311	-0.00361627	33.0311	0.000138164	33.0311	-0.00373709	33.0311	-0.000381413	33.0311	-0.00304246	33.0311	0.000173377	33.0311	-0.0032194	33.0311	-8.87e-07	33.0311	-0.00812346	33.0311	-0.00225119	33.0311	-0.00484783	33.0311	-0.000108493
15975	740	E70Q	377	$UL$3	282	33.0329	-0.00674795	33.0329	-0.0013425	33.0329	-0.00533992	33.0329	-0.000209979	33.0329	-0.00438092	33.0329	9.720972895760262e-05	33.0329	-0.00430614	33.0329	-0.000329614	33.0329	-0.00368837	33.0329	4.464417929365104e-05	33.0329	-0.0033787	33.0329	0.000100767	33.0329	-0.00360047	33.0329	-0.000324345	33.0329	-0.00307559	33.0329	0.000104258	33.0329	-0.00310875	33.0329	6.409083180725084e-06	33.0329	-0.00795962	33.0329	-0.00213643	33.0329	-0.00475597	33.0329	-0.000191535
15976	705	E70Q	377	$UN$3	283	33.0349	-0.00663396	33.0349	-0.00132928	33.0349	-0.00512331	33.0349	-0.000150417	33.0349	-0.00417743	33.0349	0.000103529	33.0349	-0.0040668	33.0349	-0.000262677	33.0349	-0.00346652	33.0349	7.563046947121378e-05	33.0349	-0.00339486	33.0349	6.111585113144358e-05	33.0349	-0.00338669	33.0349	-0.000363678	33.0349	-0.00282574	33.0349	0.000156569	33.0349	-0.00285863	33.0349	1.7899124259637342e-05	33.0349	-0.0079084	33.0349	-0.00222946	33.0349	-0.00464595	33.0349	-0.000159728
15977	740	E70Q	377	$UP$3	284	33.037	-0.00644879	33.037	-0.00137532	33.037	-0.00507823	33.037	-0.000243147	33.037	-0.00409459	33.037	3.5369752960586615e-05	33.037	-0.00401075	33.037	-0.000317328	33.037	-0.00333598	33.037	5.771349836361343e-05	33.037	-0.00306594	33.037	0.000116003	33.037	-0.00334861	33.037	-0.000474483	33.037	-0.00256641	33.037	0.000138902	33.037	-0.00274662	33.037	2.801462195297158e-05	33.037	-0.00773507	33.037	-0.00219759	33.037	-0.00456248	33.037	-0.000201898
15978	705	E70Q	377	$UR$3	285	33.0392	-0.00634447	33.0392	-0.00134608	33.0392	-0.00495574	33.0392	-0.000253018	33.0392	-0.00386639	33.0392	0.000113163	33.0392	-0.00379884	33.0392	-0.000298289	33.0392	-0.00326986	33.0392	-2.77e-05	33.0392	-0.00290801	33.0392	0.000121247	33.0392	-0.00313058	33.0392	-0.000346695	33.0392	-0.00247013	33.0392	0.000111264	33.0392	-0.00253317	33.0392	-3.62e-05	33.0392	-0.0076653	33.0392	-0.00214185	33.0392	-0.00424822	33.0392	-0.000127357
15979	740	E70Q	377	$UT$3	286	33.0416	-0.00635307	33.0416	-0.00141645	33.0416	-0.00473139	33.0416	-0.000206573	33.0416	-0.00373861	33.0416	5.1496035914598386e-05	33.0416	-0.00350364	33.0416	-0.000280362	33.0416	-0.00300707	33.0416	-3.3e-05	33.0416	-0.00280721	33.0416	6.686741240613525e-05	33.0416	-0.00294751	33.0416	-0.000428447	33.0416	-0.00235614	33.0416	0.000143735	33.0416	-0.00243975	33.0416	-1.23e-05	33.0416	-0.00757318	33.0416	-0.00220228	33.0416	-0.00422103	33.0416	-0.000213276
15980	705	E70Q	377	$UV$3	287	33.0442	-0.0062669	33.0442	-0.00144484	33.0442	-0.00461514	33.0442	-0.000181758	33.0442	-0.00366748	33.0442	-2.27e-05	33.0442	-0.0034215	33.0442	-0.000257418	33.0442	-0.00295081	33.0442	-3.23e-05	33.0442	-0.00249583	33.0442	0.000114802	33.0442	-0.00288912	33.0442	-0.000452136	33.0442	-0.00212483	33.0442	6.444715395338176e-05	33.0442	-0.00227877	33.0442	4.4646516964137045e-05	33.0442	-0.00739878	33.0442	-0.00220126	33.0442	-0.00406062	33.0442	-0.00017936
15981	740	E70Q	377	$UX$3	288	33.0468	-0.00597968	33.0468	-0.00138159	33.0468	-0.00446942	33.0468	-0.000242737	33.0468	-0.00340604	33.0468	1.3725671002541746e-05	33.0468	-0.0031873	33.0468	-0.000329104	33.0468	-0.00266134	33.0468	-2.47e-05	33.0468	-0.00236855	33.0468	7.908304638459818e-05	33.0468	-0.00267191	33.0468	-0.000462954	33.0468	-0.00198167	33.0468	0.000143291	33.0468	-0.0021412	33.0468	-3.41e-05	33.0468	-0.00726566	33.0468	-0.00219738	33.0468	-0.00392296	33.0468	-0.00019573
15982	705	E70Q	377	$UZ$3	289	33.0497	-0.00594851	33.0497	-0.00142721	33.0497	-0.00435389	33.0497	-0.000244846	33.0497	-0.00331491	33.0497	-3.59e-05	33.0497	-0.00311474	33.0497	-0.000343141	33.0497	-0.00251891	33.0497	2.8259598680715342e-05	33.0497	-0.00229448	33.0497	0.000100577	33.0497	-0.00255411	33.0497	-0.000437298	33.0497	-0.00187835	33.0497	6.862314427018464e-05	33.0497	-0.00197688	33.0497	-2.54e-05	33.0497	-0.00709769	33.0497	-0.0021872	33.0497	-0.00387874	33.0497	-0.000218066
15983	740	E70Q	377	$VB$3	290	33.0527	-0.00581303	33.0527	-0.00143572	33.0527	-0.00423448	33.0527	-0.0002618	33.0527	-0.00316468	33.0527	-4.25e-05	33.0527	-0.00288539	33.0527	-0.000300621	33.0527	-0.00241636	33.0527	-6.6e-05	33.0527	-0.00208852	33.0527	0.00011302	33.0527	-0.00233024	33.0527	-0.000447522	33.0527	-0.00184387	33.0527	3.256509503057545e-05	33.0527	-0.0019841	33.0527	-0.000106064	33.0527	-0.0069509	33.0527	-0.00218938	33.0527	-0.00363853	33.0527	-0.000266119
15984	705	E70Q	377	$VD$3	291	33.056	-0.00561853	33.056	-0.0014657	33.056	-0.00391335	33.056	-0.00022001	33.056	-0.00291711	33.056	2.1515833412517546e-05	33.056	-0.00282042	33.056	-0.000362896	33.056	-0.00218854	33.056	-5.34e-06	33.056	-0.00190916	33.056	5.911768314648125e-05	33.056	-0.00222852	33.056	-0.000483711	33.056	-0.00164573	33.056	3.484115526305141e-05	33.056	-0.00171651	33.056	-2.52e-05	33.056	-0.00689461	33.056	-0.00224706	33.056	-0.00348613	33.056	-0.000216494
15985	740	E70Q	377	$VF$3	292	33.0594	-0.00540942	33.0594	-0.00143725	33.0594	-0.00385648	33.0594	-0.000292579	33.0594	-0.00273202	33.0594	1.5419631513666036e-05	33.0594	-0.00255961	33.0594	-0.000363148	33.0594	-0.00204094	33.0594	-4.26e-05	33.0594	-0.00185081	33.0594	5.41599641925572e-05	33.0594	-0.00212405	33.0594	-0.000468757	33.0594	-0.00151186	33.0594	0.000125488	33.0594	-0.00165773	33.0594	-6.17e-05	33.0594	-0.0068082	33.0594	-0.00221375	33.0594	-0.0034422	33.0594	-0.00026098
15986	705	E70Q	377	$VH$3	293	33.063	-0.00524636	33.063	-0.00141733	33.063	-0.00362934	33.063	-0.000229384	33.063	-0.00264897	33.063	-9.02e-05	33.063	-0.00242471	33.063	-0.000354531	33.063	-0.00197211	33.063	-6.88e-05	33.063	-0.00171617	33.063	2.6761999636193412e-05	33.063	-0.00199021	33.063	-0.000460024	33.063	-0.00147775	33.063	7.282653387066969e-05	33.063	-0.00152708	33.063	-8.64e-05	33.063	-0.00653767	33.063	-0.002265	33.063	-0.00321477	33.063	-0.000227116
15987	740	E70Q	377	$VJ$3	294	33.0669	-0.00516832	33.0669	-0.00143101	33.0669	-0.00349556	33.0669	-0.000211153	33.0669	-0.00238513	33.0669	2.9781481615391223e-05	33.0669	-0.00236073	33.0669	-0.000386157	33.0669	-0.00174792	33.0669	-4.64e-05	33.0669	-0.001489	33.0669	7.944870742354615e-05	33.0669	-0.00192716	33.0669	-0.000472877	33.0669	-0.00134324	33.0669	5.9681694194169826e-05	33.0669	-0.0014532	33.0669	-8.02e-05	33.0669	-0.0064294	33.0669	-0.00226137	33.0669	-0.00308732	33.0669	-0.000231716
15988	705	E71Q	378	$VL$3	295	33.071	-0.00506313	33.071	-0.00150462	33.071	-0.00333019	33.071	-0.000319484	33.071	-0.00220603	33.071	-4.47e-06	33.071	-0.00213038	33.071	-0.000307706	33.071	-0.00158445	33.071	-7.02e-05	33.071	-0.00151216	33.071	1.6086610690468905e-05	33.071	-0.00179455	33.071	-0.000469571	33.071	-0.00117109	33.071	9.992706506799579e-06	33.071	-0.00143699	33.071	-0.000130239	33.071	-0.00643016	33.071	-0.00233662	33.071	-0.00289171	33.071	-0.000239855
15989	740	E71Q	378	$VN$3	296	33.0754	-0.00497102	33.0754	-0.00151073	33.0754	-0.00322903	33.0754	-0.000271799	33.0754	-0.00213353	33.0754	-8e-06	33.0754	-0.00197583	33.0754	-0.000364656	33.0754	-0.00152025	33.0754	-5.41e-05	33.0754	-0.00135225	33.0754	5.1754125670155915e-05	33.0754	-0.00175527	33.0754	-0.000515609	33.0754	-0.00117815	33.0754	1.9418666313291214e-05	33.0754	-0.00137462	33.0754	-7.81e-05	33.0754	-0.00612524	33.0754	-0.0022745	33.0754	-0.00276527	33.0754	-0.00021261
15990	705	E71Q	378	$VP$3	297	33.0801	-0.00469085	33.0801	-0.00143043	33.0801	-0.00307047	33.0801	-0.00023361	33.0801	-0.00202733	33.0801	-7.9e-05	33.0801	-0.00187477	33.0801	-0.000377793	33.0801	-0.00130841	33.0801	-6.35e-05	33.0801	-0.00120257	33.0801	1.3152561469054191e-05	33.0801	-0.00156995	33.0801	-0.000514518	33.0801	-0.000950659	33.0801	8.410167503522699e-05	33.0801	-0.00122339	33.0801	-8.86e-05	33.0801	-0.0059672	33.0801	-0.00227593	33.0801	-0.00268143	33.0801	-0.000326163
15991	740	E71Q	378	$VR$3	298	33.085	-0.00449604	33.085	-0.00154248	33.085	-0.00297447	33.085	-0.000318207	33.085	-0.0017778	33.085	-1.49e-05	33.085	-0.0018163	33.085	-0.000475966	33.085	-0.00130053	33.085	-0.000109942	33.085	-0.00109265	33.085	5.550636930118369e-05	33.085	-0.00152062	33.085	-0.000556941	33.085	-0.000921589	33.085	1.5787819031762296e-06	33.085	-0.00120273	33.085	-0.00014449	33.085	-0.00578326	33.085	-0.00226396	33.085	-0.00245215	33.085	-0.000268301
15992	705	E71Q	378	$VT$3	299	33.0903	-0.00441506	33.0903	-0.00154414	33.0903	-0.00284212	33.0903	-0.000392004	33.0903	-0.00176386	33.0903	-9.57e-05	33.0903	-0.00170309	33.0903	-0.000442897	33.0903	-0.00115782	33.0903	-9.72e-05	33.0903	-0.000938467	33.0903	5.6217680198200615e-05	33.0903	-0.00144297	33.0903	-0.000529026	33.0903	-0.000835344	33.0903	4.160888004535457e-05	33.0903	-0.00108275	33.0903	-0.000122504	33.0903	-0.00569663	33.0903	-0.00230495	33.0903	-0.00237532	33.0903	-0.000260839
15993	740	E71Q	378	$VV$3	300	33.0959	-0.00420695	33.0959	-0.00150562	33.0959	-0.00259404	33.0959	-0.000316437	33.0959	-0.00147743	33.0959	-4.05e-05	33.0959	-0.001421	33.0959	-0.000383878	33.0959	-0.00113958	33.0959	-9.93e-05	33.0959	-0.000818549	33.0959	6.202206941774424e-05	33.0959	-0.00131084	33.0959	-0.000516756	33.0959	-0.000796322	33.0959	-7.67e-06	33.0959	-0.000981149	33.0959	-0.000112187	33.0959	-0.00557961	33.0959	-0.00238519	33.0959	-0.00227683	33.0959	-0.000299509
15994	705	E71Q	378	$VX$3	301	33.1018	-0.00408678	33.1018	-0.00148538	33.1018	-0.002439	33.1018	-0.000311693	33.1018	-0.00137874	33.1018	-8.61e-05	33.1018	-0.00142371	33.1018	-0.000412176	33.1018	-0.000958738	33.1018	-8e-05	33.1018	-0.000852251	33.1018	3.567093293316281e-05	33.1018	-0.00128466	33.1018	-0.000571312	33.1018	-0.000697961	33.1018	4.058333456391332e-05	33.1018	-0.00101481	33.1018	-0.000132794	33.1018	-0.00547516	33.1018	-0.00239984	33.1018	-0.00206615	33.1018	-0.000281682
15995	740	E71Q	378	$VZ$3	302	33.1081	-0.00382869	33.1081	-0.00150942	33.1081	-0.00229807	33.1081	-0.00033341	33.1081	-0.0012178	33.1081	-9.96e-06	33.1081	-0.00128063	33.1081	-0.000427363	33.1081	-0.000872718	33.1081	-9.91e-05	33.1081	-0.000688147	33.1081	2.9263878845775526e-05	33.1081	-0.00116138	33.1081	-0.000513659	33.1081	-0.000656343	33.1081	2.90738519381252e-05	33.1081	-0.000770602	33.1081	-4.82e-05	33.1081	-0.00527074	33.1081	-0.00234791	33.1081	-0.00196876	33.1081	-0.000275162
15996	705	E71Q	378	$WB$3	303	33.1148	-0.00374542	33.1148	-0.00151826	33.1148	-0.00215029	33.1148	-0.000361405	33.1148	-0.00109242	33.1148	-5.75e-05	33.1148	-0.00112775	33.1148	-0.000407551	33.1148	-0.000769129	33.1148	-0.000107065	33.1148	-0.000654571	33.1148	3.495459577207427e-05	33.1148	-0.00109414	33.1148	-0.000512156	33.1148	-0.000546767	33.1148	6.1458503862152e-05	33.1148	-0.00069708	33.1148	-1.53e-05	33.1148	-0.00513821	33.1148	-0.00232777	33.1148	-0.0017769	33.1148	-0.00030054
15997	740	E71Q	378	$WD$3	304	33.122	-0.00351679	33.122	-0.00150398	33.122	-0.00213486	33.122	-0.000373873	33.122	-0.00103344	33.122	-0.000119151	33.122	-0.00117148	33.122	-0.000483741	33.122	-0.000660009	33.122	-9.89e-05	33.122	-0.000553845	33.122	4.6899998506266805e-05	33.122	-0.000976805	33.122	-0.000487297	33.122	-0.000565395	33.122	5.324133876475311e-05	33.122	-0.000671715	33.122	-7.81e-05	33.122	-0.00505657	33.122	-0.00236853	33.122	-0.00170507	33.122	-0.000390338
15998	705	E71Q	378	$WF$3	305	33.1296	-0.00337753	33.1296	-0.00156436	33.1296	-0.00185773	33.1296	-0.00039307	33.1296	-0.0010648	33.1296	-0.000159844	33.1296	-0.0010483	33.1296	-0.000508746	33.1296	-0.000663721	33.1296	-0.000168047	33.1296	-0.0005452	33.1296	-1.73e-05	33.1296	-0.00102846	33.1296	-0.000593023	33.1296	-0.000440654	33.1296	3.982340826347297e-05	33.1296	-0.000571134	33.1296	-9.44e-05	33.1296	-0.00488089	33.1296	-0.00241958	33.1296	-0.0016002	33.1296	-0.000345828
15999	740	E71Q	378	$WH$3	306	33.1376	-0.00335723	33.1376	-0.00151284	33.1376	-0.00176127	33.1376	-0.00043037	33.1376	-0.000840455	33.1376	-7.18e-05	33.1376	-0.000880197	33.1376	-0.000442348	33.1376	-0.000568221	33.1376	-0.000121636	33.1376	-0.000417147	33.1376	4.055767409733013e-05	33.1376	-0.000922721	33.1376	-0.000609945	33.1376	-0.000370554	33.1376	2.4639670433299066e-05	33.1376	-0.000517146	33.1376	-8.75e-05	33.1376	-0.00463061	33.1376	-0.00232344	33.1376	-0.00153327	33.1376	-0.000404204
16000	705	E71Q	378	$WJ$3	307	33.1462	-0.00312178	33.1462	-0.00159774	33.1462	-0.00162535	33.1462	-0.000416621	33.1462	-0.000772066	33.1462	-0.000124005	33.1462	-0.000804435	33.1462	-0.0004091	33.1462	-0.000443623	33.1462	-0.000110079	33.1462	-0.000418284	33.1462	2.1936742629791173e-05	33.1462	-0.000815433	33.1462	-0.000506604	33.1462	-0.0002866	33.1462	4.347007570947893e-05	33.1462	-0.000544843	33.1462	-9.64e-05	33.1462	-0.00443495	33.1462	-0.00234024	33.1462	-0.00127383	33.1462	-0.000299516
16001	740	E71Q	378	$WL$3	308	33.1553	-0.00304924	33.1553	-0.00154336	33.1553	-0.00149949	33.1553	-0.000367784	33.1553	-0.000656006	33.1553	-7.65e-05	33.1553	-0.000719818	33.1553	-0.000415442	33.1553	-0.000407023	33.1553	-0.000162366	33.1553	-0.000423105	33.1553	-6.95e-06	33.1553	-0.00087889	33.1553	-0.000581329	33.1553	-0.00034181	33.1553	-4.79e-05	33.1553	-0.000441948	33.1553	-0.000131695	33.1553	-0.00440106	33.1553	-0.00239316	33.1553	-0.00127687	33.1553	-0.000328137
16002	705	E71Q	378	$WN$3	309	33.165	-0.00285374	33.165	-0.00162193	33.165	-0.00144961	33.165	-0.000443692	33.165	-0.00056679	33.165	-0.000107774	33.165	-0.000745137	33.165	-0.000478818	33.165	-0.000431608	33.165	-0.000202426	33.165	-0.000255534	33.165	3.890642422899049e-05	33.165	-0.000836911	33.165	-0.00060088	33.165	-0.000266616	33.165	4.546850782581255e-05	33.165	-0.000456628	33.165	-0.000144194	33.165	-0.00420816	33.165	-0.00235699	33.165	-0.00109025	33.165	-0.000356835
16003	740	E71Q	378	$WP$3	310	33.1753	-0.00281989	33.1753	-0.00168068	33.1753	-0.00132003	33.1753	-0.000458133	33.1753	-0.000512878	33.1753	-0.000136886	33.1753	-0.00071771	33.1753	-0.000496131	33.1753	-0.000401242	33.1753	-0.000193129	33.1753	-0.000266391	33.1753	1.5515574133262433e-05	33.1753	-0.000703974	33.1753	-0.000568422	33.1753	-0.00021677	33.1753	1.0716346647999392e-06	33.1753	-0.000395212	33.1753	-0.00015997	33.1753	-0.00421923	33.1753	-0.00248091	33.1753	-0.00104776	33.1753	-0.000351437
16004	705	E71Q	378	$WR$3	311	33.1863	-0.002638	33.1863	-0.00159546	33.1863	-0.0012456	33.1863	-0.000421543	33.1863	-0.000466873	33.1863	-8.18e-05	33.1863	-0.000623726	33.1863	-0.000407119	33.1863	-0.000294025	33.1863	-0.000142673	33.1863	-0.000158608	33.1863	4.0663578228683495e-05	33.1863	-0.00073639	33.1863	-0.000598007	33.1863	-0.000115089	33.1863	2.2254750646063734e-05	33.1863	-0.000318598	33.1863	-0.000130014	33.1863	-0.00415517	33.1863	-0.00244686	33.1863	-0.000976101	33.1863	-0.000374146
16005	740	E71Q	378	$WT$3	312	33.1979	-0.00251881	33.1979	-0.00163911	33.1979	-0.00113289	33.1979	-0.000454433	33.1979	-0.000395254	33.1979	-0.0001	33.1979	-0.000493918	33.1979	-0.000474619	33.1979	-0.000243353	33.1979	-9.22e-05	33.1979	-0.000135921	33.1979	5.934473312041444e-06	33.1979	-0.000750536	33.1979	-0.000655575	33.1979	-0.000153116	33.1979	6.9349452930106414e-06	33.1979	-0.000337722	33.1979	-0.000148196	33.1979	-0.00397244	33.1979	-0.00236376	33.1979	-0.000959711	33.1979	-0.000433276
15584	705	WT	359	$WV$3	313	33.2103	-0.00248145	33.2103	-0.00161293	33.2103	-0.00101756	33.2103	-0.000364054	33.2103	-0.000356418	33.2103	-9.6e-05	33.2103	-0.000503946	33.2103	-0.000501696	33.2103	-0.00021249	33.2103	-0.000210002	33.2103	-3.49e-05	33.2103	3.72770040529824e-06	33.2103	-0.000685038	33.2103	-0.000647478	33.2103	-8.68e-05	33.2103	-2.1e-05	33.2103	-0.000206483	33.2103	-0.000119531	33.2103	-0.00383193	33.2103	-0.00241482	33.2103	-0.000893722	33.2103	-0.000389973
15585	740	WT	359	$WX$3	314	33.2235	-0.00230482	33.2235	-0.00158537	33.2235	-0.000924131	33.2235	-0.000434881	33.2235	-0.000327133	33.2235	-7.08e-05	33.2235	-0.000525679	33.2235	-0.000465079	33.2235	-0.000149312	33.2235	-0.000156881	33.2235	-6.11e-05	33.2235	5.5024492055189e-05	33.2235	-0.000604839	33.2235	-0.000546853	33.2235	-6.68e-05	33.2235	-6.84e-06	33.2235	-0.000383424	33.2235	-0.000177391	33.2235	-0.00382631	33.2235	-0.00247581	33.2235	-0.000818432	33.2235	-0.000403881
15598	705	WT	359	$WZ$3	315	33.2375	-0.0023078	33.2375	-0.00167403	33.2375	-0.000899368	33.2375	-0.000456487	33.2375	-0.000307014	33.2375	-0.000182092	33.2375	-0.000488384	33.2375	-0.000468116	33.2375	-0.000148973	33.2375	-0.000161227	33.2375	-9.4e-05	33.2375	-1.99e-05	33.2375	-0.00063372	33.2375	-0.000643126	33.2375	-6.47e-05	33.2375	9.97219495834853e-06	33.2375	-0.000223792	33.2375	-0.000192594	33.2375	-0.00371117	33.2375	-0.00249822	33.2375	-0.000714625	33.2375	-0.000344897
15599	740	WT	359	$XB$3	316	33.2523	-0.00210927	33.2523	-0.00162408	33.2523	-0.00086396	33.2523	-0.000465235	33.2523	-0.000211306	33.2523	-0.000169881	33.2523	-0.000485276	33.2523	-0.000494916	33.2523	-0.00014796	33.2523	-0.00016973	33.2523	-2.91e-07	33.2523	7.5415124641264875e-06	33.2523	-0.000646484	33.2523	-0.000608416	33.2523	-4.71e-05	33.2523	-1.37e-05	33.2523	-0.000234508	33.2523	-0.000120241	33.2523	-0.00362805	33.2523	-0.00243551	33.2523	-0.000753316	33.2523	-0.000442949
15600	705	WT	359	$XD$3	317	33.2681	-0.00221711	33.2681	-0.00172094	33.2681	-0.000669776	33.2681	-0.0003542	33.2681	-0.000162407	33.2681	-0.000145523	33.2681	-0.000406839	33.2681	-0.000454469	33.2681	-8.39e-05	33.2681	-0.000156836	33.2681	-5.77e-05	33.2681	-2.34e-08	33.2681	-0.000620149	33.2681	-0.000568421	33.2681	4.0720838125986964e-05	33.2681	1.270277087548656e-05	33.2681	-0.000248388	33.2681	-0.000145872	33.2681	-0.00362032	33.2681	-0.00245676	33.2681	-0.000606991	33.2681	-0.000332389
15601	740	WT	359	$XF$3	318	33.2849	-0.00208929	33.2849	-0.00171257	33.2849	-0.00072521	33.2849	-0.000430707	33.2849	-0.000293361	33.2849	-0.000150053	33.2849	-0.000400115	33.2849	-0.000439859	33.2849	-0.000107305	33.2849	-0.000182563	33.2849	-4.81e-05	33.2849	-4.92e-05	33.2849	-0.000455531	33.2849	-0.000533944	33.2849	2.7260889407217234e-05	33.2849	7.85530933106876e-06	33.2849	-0.000115002	33.2849	-8.86e-05	33.2849	-0.00351567	33.2849	-0.00241119	33.2849	-0.000691491	33.2849	-0.000425717
15606	705	WT	359	$XH$3	319	33.3028	-0.00198626	33.3028	-0.00159073	33.3028	-0.00070802	33.3028	-0.000481703	33.3028	-0.000298326	33.3028	-0.000229547	33.3028	-0.000355577	33.3028	-0.000508408	33.3028	-0.000100768	33.3028	-0.000118443	33.3028	2.0405315302798877e-05	33.3028	-8.23e-06	33.3028	-0.000563699	33.3028	-0.00060807	33.3028	-2.27e-05	33.3028	-3.86e-05	33.3028	-0.000296238	33.3028	-0.000222543	33.3028	-0.00343803	33.3028	-0.00241472	33.3028	-0.000600678	33.3028	-0.000406103
15607	740	WT	359	$XJ$3	320	33.3218	-0.00195099	33.3218	-0.00163594	33.3218	-0.000706751	33.3218	-0.000438335	33.3218	-0.000135707	33.3218	-9.11e-05	33.3218	-0.000317088	33.3218	-0.00045989	33.3218	-0.00010595	33.3218	-0.000150432	33.3218	-7.8e-05	33.3218	-3.3e-05	33.3218	-0.000445365	33.3218	-0.000618531	33.3218	-8.76e-05	33.3218	-6.54e-05	33.3218	-0.000134465	33.3218	-7.57e-05	33.3218	-0.00335362	33.3218	-0.00242819	33.3218	-0.000595284	33.3218	-0.000403122
15608	705	WT	359	$XL$3	321	33.342	-0.00198072	33.342	-0.00171428	33.342	-0.000621288	33.342	-0.00044133	33.342	-0.000233665	33.342	-0.000161938	33.342	-0.000413626	33.342	-0.000592591	33.342	-0.000165109	33.342	-0.000188995	33.342	-2.81e-05	33.342	-4.49e-05	33.342	-0.000526528	33.342	-0.000612946	33.342	9.297207876675481e-05	33.342	3.107918933468318e-05	33.342	-0.000168974	33.342	-0.000137459	33.342	-0.0034514	33.342	-0.00253359	33.342	-0.000652027	33.342	-0.000440826
15609	740	WT	359	$XN$3	322	33.3634	-0.00185593	33.3634	-0.00162498	33.3634	-0.000542866	33.3634	-0.00040692	33.3634	-9.15e-05	33.3634	-0.000118262	33.3634	-0.00035944	33.3634	-0.000456563	33.3634	-0.000153419	33.3634	-0.00020389	33.3634	-4.8e-05	33.3634	-3.53e-05	33.3634	-0.000486967	33.3634	-0.000538139	33.3634	-0.00011242	33.3634	-0.0001076	33.3634	-0.000120277	33.3634	-0.000159088	33.3634	-0.00334604	33.3634	-0.00243392	33.3634	-0.000456417	33.3634	-0.000431478
15610	705	WT	359	$XP$3	323	33.3862	-0.00175176	33.3862	-0.00161868	33.3862	-0.000575798	33.3862	-0.000494018	33.3862	-0.000128214	33.3862	-0.000173818	33.3862	-0.000423217	33.3862	-0.000510777	33.3862	-4.24e-05	33.3862	-0.000162884	33.3862	0.00010339	33.3862	1.0680775880844706e-05	33.3862	-0.000448994	33.3862	-0.000584084	33.3862	6.52129233301693e-05	33.3862	-6.04e-05	33.3862	-0.000143286	33.3862	-0.000124831	33.3862	-0.00341464	33.3862	-0.00257314	33.3862	-0.000481239	33.3862	-0.000402317
15611	740	WT	359	$XR$3	324	33.4105	-0.00178693	33.4105	-0.00169945	33.4105	-0.000602002	33.4105	-0.000486555	33.4105	-0.000150719	33.4105	-0.000158604	33.4105	-0.000299701	33.4105	-0.000514803	33.4105	-3.62e-05	33.4105	-0.00010459	33.4105	6.264284244066054e-05	33.4105	2.514181311763508e-05	33.4105	-0.00044856	33.4105	-0.000598122	33.4105	5.552705487397221e-05	33.4105	-5.73e-05	33.4105	-0.000132945	33.4105	-0.000125375	33.4105	-0.00325835	33.4105	-0.00242288	33.4105	-0.000636195	33.4105	-0.000474609
15612	705	WT	359	$XT$3	325	33.4362	-0.00188215	33.4362	-0.00171131	33.4362	-0.000566547	33.4362	-0.000483557	33.4362	-0.000216735	33.4362	-0.000207219	33.4362	-0.000337589	33.4362	-0.000471808	33.4362	2.078717890372818e-05	33.4362	-0.00018189	33.4362	7.513556840229446e-05	33.4362	4.7179725285562135e-05	33.4362	-0.000472834	33.4362	-0.000593927	33.4362	7.473337734250902e-05	33.4362	-5.51e-05	33.4362	-0.000119128	33.4362	-0.000123148	33.4362	-0.00326562	33.4362	-0.00247442	33.4362	-0.000542808	33.4362	-0.000409828
15613	740	WT	359	$XV$3	326	33.4636	-0.00169964	33.4636	-0.00162434	33.4636	-0.000487951	33.4636	-0.000462846	33.4636	-9.55e-05	33.4636	-0.000140449	33.4636	-0.000341665	33.4636	-0.000487628	33.4636	-0.000106211	33.4636	-0.000182996	33.4636	4.1890480471790115e-06	33.4636	-2.89e-05	33.4636	-0.000573367	33.4636	-0.000672428	33.4636	7.731843055370819e-05	33.4636	-7.52e-07	33.4636	-0.000109681	33.4636	-5.91e-05	33.4636	-0.00325442	33.4636	-0.00241722	33.4636	-0.000484158	33.4636	-0.00040946
15614	705	WT	359	$XX$3	327	33.4928	-0.00183767	33.4928	-0.00171136	33.4928	-0.000580478	33.4928	-0.000460489	33.4928	-0.000125536	33.4928	-0.000153559	33.4928	-0.000381406	33.4928	-0.000549998	33.4928	3.591953570591857e-05	33.4928	-0.000134492	33.4928	5.8302802497647854e-05	33.4928	4.560889989357886e-05	33.4928	-0.000404612	33.4928	-0.00056178	33.4928	0.000141603	33.4928	-4.44e-06	33.4928	-0.000187206	33.4928	-0.000146666	33.4928	-0.00340407	33.4928	-0.00257897	33.4928	-0.000440741	33.4928	-0.000417834
15615	740	WT	359	$XZ$3	328	33.5237	-0.00180769	33.5237	-0.00167144	33.5237	-0.000478542	33.5237	-0.000505903	33.5237	-7.25e-05	33.5237	-0.000132217	33.5237	-0.000372394	33.5237	-0.000533395	33.5237	-4.7e-05	33.5237	-0.000150394	33.5237	0.000124703	33.5237	-2.54e-06	33.5237	-0.000428085	33.5237	-0.000582766	33.5237	8.634580618625972e-05	33.5237	-2.15e-05	33.5237	-0.000186424	33.5237	-0.000135449	33.5237	-0.00326888	33.5237	-0.00247437	33.5237	-0.000502573	33.5237	-0.000387138
					329	33.5566	-0.00188206	33.5566	-0.00179293	33.5566	-0.000507035	33.5566	-0.000478763	33.5566	-0.000188496	33.5566	-0.000197486	33.5566	-0.00031392	33.5566	-0.000547152	33.5566	-1.17e-06	33.5566	-0.000164384	33.5566	1.0167620014274459e-05	33.5566	2.807111008973351e-05	33.5566	-0.000460786	33.5566	-0.000521544	33.5566	0.000102508	33.5566	-2.39e-05	33.5566	-0.000134336	33.5566	-0.000170322	33.5566	-0.00325349	33.5566	-0.0024998	33.5566	-0.000629661	33.5566	-0.000444917
					330	33.5916	-0.00173276	33.5916	-0.00165129	33.5916	-0.000596282	33.5916	-0.000467804	33.5916	-0.000147758	33.5916	-0.000197989	33.5916	-0.000475322	33.5916	-0.000583025	33.5916	-0.00018526	33.5916	-0.000220536	33.5916	5.639385841233607e-05	33.5916	-2.29e-05	33.5916	-0.000448868	33.5916	-0.000565982	33.5916	1.5886023427928112e-05	33.5916	-7.12e-05	33.5916	-0.000245176	33.5916	-0.000150396	33.5916	-0.00319905	33.5916	-0.00249553	33.5916	-0.000420705	33.5916	-0.000376602
					331	33.6288	-0.0017313	33.6288	-0.00167967	33.6288	-0.000501731	33.6288	-0.000455996	33.6288	-0.000215833	33.6288	-0.000176866	33.6288	-0.00032654	33.6288	-0.000468407	33.6288	-0.000148846	33.6288	-0.000223355	33.6288	-8.01e-05	33.6288	-5.51e-05	33.6288	-0.000510278	33.6288	-0.000595673	33.6288	0.000106984	33.6288	-9.47e-06	33.6288	-0.000182959	33.6288	-0.000178855	33.6288	-0.0032943	33.6288	-0.00247076	33.6288	-0.000504764	33.6288	-0.000416321
					332	33.6683	-0.00181338	33.6683	-0.00173585	33.6683	-0.000455373	33.6683	-0.000457026	33.6683	-0.000147081	33.6683	-0.000204281	33.6683	-0.000352923	33.6683	-0.000487674	33.6683	-3.07e-05	33.6683	-0.000108277	33.6683	3.60201736624155e-05	33.6683	4.021956131972093e-06	33.6683	-0.000484318	33.6683	-0.000581794	33.6683	0.000109901	33.6683	-2.99e-05	33.6683	-0.000123731	33.6683	-7.44e-05	33.6683	-0.00328693	33.6683	-0.00252638	33.6683	-0.000457657	33.6683	-0.000369787
					333	33.7104	-0.00175495	33.7104	-0.00170922	33.7104	-0.000524856	33.7104	-0.000468558	33.7104	-6.98e-05	33.7104	-0.000130612	33.7104	-0.000367768	33.7104	-0.000488217	33.7104	-0.000110717	33.7104	-0.000229115	33.7104	6.632618977195359e-05	33.7104	2.302897062039788e-05	33.7104	-0.000510154	33.7104	-0.000573796	33.7104	-2.61e-05	33.7104	-8.12e-05	33.7104	-0.000241344	33.7104	-0.0001571	33.7104	-0.00333312	33.7104	-0.00251775	33.7104	-0.000520705	33.7104	-0.000436289
					334	33.755	-0.00174891	33.755	-0.00169941	33.755	-0.000602142	33.755	-0.000475084	33.755	-0.000171693	33.755	-0.000195491	33.755	-0.000315473	33.755	-0.000484254	33.755	-7.73e-05	33.755	-0.000232815	33.755	-1.9e-05	33.755	-1.55e-05	33.755	-0.000424651	33.755	-0.000585235	33.755	6.851297084618313e-05	33.755	6.965381824321562e-06	33.755	-0.000117178	33.755	-0.000106882	33.755	-0.00322186	33.755	-0.00249623	33.755	-0.000443239	33.755	-0.000411723
					335	33.8025	-0.00175775	33.8025	-0.0016662	33.8025	-0.000518501	33.8025	-0.000463362	33.8025	-0.000168412	33.8025	-0.000175013	33.8025	-0.000307304	33.8025	-0.000462328	33.8025	-1.47e-05	33.8025	-0.00015186	33.8025	-2.33e-05	33.8025	-3.2e-06	33.8025	-0.000397647	33.8025	-0.000535356	33.8025	9.983971924875106e-05	33.8025	-3.21e-05	33.8025	-0.000111532	33.8025	-0.000109896	33.8025	-0.0032744	33.8025	-0.00247753	33.8025	-0.000429621	33.8025	-0.000394792
					336	33.853	-0.00172799	33.853	-0.00166885	33.853	-0.000469377	33.853	-0.000419572	33.853	-2.69e-05	33.853	-0.000130182	33.853	-0.000389907	33.853	-0.000517244	33.853	1.8550007735818053e-05	33.853	-0.000162275	33.853	9.616714490064127e-05	33.853	2.6281009071149608e-05	33.853	-0.000557669	33.853	-0.000585903	33.853	6.711216242894641e-05	33.853	-4.29e-05	33.853	-0.000194109	33.853	-0.000105428	33.853	-0.0032958	33.853	-0.00248737	33.853	-0.000575991	33.853	-0.000455209
					337	33.9067	-0.00175407	33.9067	-0.00172339	33.9067	-0.000502788	33.9067	-0.000411789	33.9067	-0.00019668	33.9067	-0.000175204	33.9067	-0.000268191	33.9067	-0.000441752	33.9067	-3.71e-05	33.9067	-0.00015492	33.9067	9.25350629812638e-05	33.9067	2.3595820611177487e-05	33.9067	-0.000482287	33.9067	-0.000605788	33.9067	-3.08e-06	33.9067	-4.88e-05	33.9067	-9.12e-05	33.9067	-8.68e-05	33.9067	-0.00326228	33.9067	-0.00245666	33.9067	-0.000397807	33.9067	-0.000400515
					338	33.9637	-0.00182674	33.9637	-0.00176531	33.9637	-0.00048528	33.9637	-0.00046426	33.9637	-9.34e-05	33.9637	-8.91e-05	33.9637	-0.000354057	33.9637	-0.000482011	33.9637	-0.000116025	33.9637	-0.000148286	33.9637	0.000134556	33.9637	3.837881991225478e-05	33.9637	-0.000437832	33.9637	-0.000553032	33.9637	-3.71e-05	33.9637	-0.000108509	33.9637	-0.000271809	33.9637	-0.000178603	33.9637	-0.00332965	33.9637	-0.00254457	33.9637	-0.000442713	33.9637	-0.000391754
					339	34.0244	-0.00185729	34.0244	-0.00175683	34.0244	-0.000475022	34.0244	-0.000424375	34.0244	-1.58e-06	34.0244	-8.57e-05	34.0244	-0.000406828	34.0244	-0.000574709	34.0244	7.169742572677622e-06	34.0244	-0.000145895	34.0244	6.669954661717853e-05	34.0244	-6.86e-06	34.0244	-0.000474691	34.0244	-0.000554677	34.0244	0.000122541	34.0244	7.155551217071995e-06	34.0244	-0.000255624	34.0244	-0.000162933	34.0244	-0.00332569	34.0244	-0.00253028	34.0244	-0.000474887	34.0244	-0.000371751
					340	34.0888	-0.00181304	34.0888	-0.00174939	34.0888	-0.000504738	34.0888	-0.000497136	34.0888	-1.69e-05	34.0888	-0.000177927	34.0888	-0.00039812	34.0888	-0.000515232	34.0888	-3.79e-05	34.0888	-0.000146006	34.0888	7.087227825525177e-05	34.0888	2.139252896610211e-05	34.0888	-0.000420667	34.0888	-0.000527227	34.0888	8.305657415454896e-05	34.0888	-1.95e-05	34.0888	-7.67e-05	34.0888	-5.78e-05	34.0888	-0.00323102	34.0888	-0.00252129	34.0888	-0.000471671	34.0888	-0.000402324
					341	34.1574	-0.0018201	34.1574	-0.00165017	34.1574	-0.00061041	34.1574	-0.000499721	34.1574	4.6136751177144365e-06	34.1574	-8.34e-05	34.1574	-0.000441318	34.1574	-0.00057195	34.1574	3.724036005423948e-05	34.1574	-9.77e-05	34.1574	-2.02e-05	34.1574	-5.25e-06	34.1574	-0.000466829	34.1574	-0.000539115	34.1574	3.445508618709595e-05	34.1574	8.173867412079872e-06	34.1574	-0.000196862	34.1574	-0.000147295	34.1574	-0.00334174	34.1574	-0.00257436	34.1574	-0.000424595	34.1574	-0.000398834
					342	34.2302	-0.0018419	34.2302	-0.00179614	34.2302	-0.000478637	34.2302	-0.000416716	34.2302	-6.21e-05	34.2302	-8.71e-05	34.2302	-0.000368353	34.2302	-0.000468519	34.2302	3.895605792680608e-05	34.2302	-9.09e-05	34.2302	6.566276124916892e-05	34.2302	2.307845112331508e-05	34.2302	-0.000540548	34.2302	-0.000599603	34.2302	5.0153675748892436e-05	34.2302	1.1277601959460218e-05	34.2302	-0.000170317	34.2302	-0.000159467	34.2302	-0.00331027	34.2302	-0.00250142	34.2302	-0.000482961	34.2302	-0.000410393
					343	34.3076	-0.00180738	34.3076	-0.00170152	34.3076	-0.000556314	34.3076	-0.000490453	34.3076	-0.000251512	34.3076	-0.000248939	34.3076	-0.000408586	34.3076	-0.000579874	34.3076	-0.000105113	34.3076	-0.000141592	34.3076	0.000136126	34.3076	1.0796530452328312e-05	34.3076	-0.000426429	34.3076	-0.000498432	34.3076	5.3144849427826015e-05	34.3076	2.2298969036270086e-05	34.3076	-0.000234936	34.3076	-0.000187672	34.3076	-0.00339147	34.3076	-0.00262044	34.3076	-0.000494558	34.3076	-0.000422036
					344	34.39	-0.00179627	34.39	-0.00167438	34.39	-0.000518846	34.39	-0.000436031	34.39	-0.000153559	34.39	-0.000136636	34.39	-0.000387183	34.39	-0.000497388	34.39	-4.59e-05	34.39	-0.000131044	34.39	0.00010188	34.39	6.274299205283329e-05	34.39	-0.000472907	34.39	-0.000574694	34.39	-2.51e-05	34.39	-8.61e-05	34.39	-0.000110086	34.39	-9.73e-05	34.39	-0.00332488	34.39	-0.00255247	34.39	-0.000470468	34.39	-0.000383046
					345	34.4775	-0.00175189	34.4775	-0.0017086	34.4775	-0.000497501	34.4775	-0.000415486	34.4775	-9.55e-05	34.4775	-0.000138025	34.4775	-0.000406404	34.4775	-0.00054084	34.4775	1.999170353793496e-05	34.4775	-5.56e-05	34.4775	-6.55e-05	34.4775	9.561384498202319e-06	34.4775	-0.000438866	34.4775	-0.000549084	34.4775	-2.5e-05	34.4775	-8.32e-05	34.4775	-0.000195219	34.4775	-0.000106976	34.4775	-0.00346572	34.4775	-0.00263632	34.4775	-0.00058386	34.4775	-0.000461093
					346	34.5705	-0.00187594	34.5705	-0.0017866	34.5705	-0.000520328	34.5705	-0.000432188	34.5705	-0.00010051	34.5705	-8e-05	34.5705	-0.000323028	34.5705	-0.000462565	34.5705	3.617522565269515e-06	34.5705	-7.37e-05	34.5705	0.000143315	34.5705	1.077157058271272e-05	34.5705	-0.000474651	34.5705	-0.00053037	34.5705	7.042581629414213e-05	34.5705	2.2183575550534587e-05	34.5705	-0.000184764	34.5705	-7.28e-05	34.5705	-0.00338465	34.5705	-0.00258125	34.5705	-0.000505872	34.5705	-0.000450882
					347	34.6694	-0.00180137	34.6694	-0.0017156	34.6694	-0.000617287	34.6694	-0.000488368	34.6694	-0.000107698	34.6694	-9.07e-05	34.6694	-0.000422678	34.6694	-0.000544014	34.6694	-3.4e-05	34.6694	-0.000173461	34.6694	0.000113647	34.6694	1.6101352537933877e-05	34.6694	-0.000383643	34.6694	-0.000503661	34.6694	9.048136366324416e-05	34.6694	5.7336661522260426e-05	34.6694	-0.000189797	34.6694	-0.000106771	34.6694	-0.00339325	34.6694	-0.00253034	34.6694	-0.000610835	34.6694	-0.000489455
					348	34.7745	-0.00184394	34.7745	-0.00170685	34.7745	-0.00058822	34.7745	-0.000478274	34.7745	-0.000130703	34.7745	-0.000191923	34.7745	-0.000294809	34.7745	-0.000458654	34.7745	7.87470268976435e-05	34.7745	-6.23e-05	34.7745	3.457612532079685e-05	34.7745	4.3494480355676934e-06	34.7745	-0.000478429	34.7745	-0.000521527	34.7745	8.353834932610686e-06	34.7745	-4.15e-06	34.7745	-0.000115865	34.7745	-4.25e-05	34.7745	-0.00338952	34.7745	-0.00253686	34.7745	-0.000452321	34.7745	-0.000400354
					349	34.8862	-0.00183718	34.8862	-0.00179215	34.8862	-0.00048321	34.8862	-0.00044575	34.8862	-0.000201819	34.8862	-0.000184881	34.8862	-0.000298687	34.8862	-0.000442555	34.8862	-1.01e-05	34.8862	-0.000102877	34.8862	0.000126128	34.8862	2.4051076619902023e-05	34.8862	-0.000487947	34.8862	-0.000512639	34.8862	8.716756690407986e-05	34.8862	2.4760279554079945e-05	34.8862	-0.000291626	34.8862	-0.000154052	34.8862	-0.00340758	34.8862	-0.00259609	34.8862	-0.000404591	34.8862	-0.000446235
					350	35.005	-0.00190098	35.005	-0.00175685	35.005	-0.000606619	35.005	-0.000500392	35.005	-5.9e-05	35.005	-7.72e-05	35.005	-0.000306061	35.005	-0.000496886	35.005	-1.68e-05	35.005	-0.000142602	35.005	0.000112369	35.005	4.103059412507992e-05	35.005	-0.000461732	35.005	-0.000525977	35.005	0.000111052	35.005	1.1252536283111458e-05	35.005	-0.000209384	35.005	-9.5e-05	35.005	-0.00342869	35.005	-0.00260059	35.005	-0.000420964	35.005	-0.000330994
					351	35.1313	-0.00177116	35.1313	-0.00170695	35.1313	-0.000500295	35.1313	-0.000463223	35.1313	-9.23e-05	35.1313	-8.4e-05	35.1313	-0.000276955	35.1313	-0.00046904	35.1313	9.295043866479097e-05	35.1313	-7.98e-05	35.1313	0.000173886	35.1313	4.4800156739355224e-05	35.1313	-0.000463251	35.1313	-0.000504698	35.1313	6.983560499884472e-05	35.1313	4.310772595320089e-05	35.1313	-0.000251284	35.1313	-0.000196952	35.1313	-0.00343169	35.1313	-0.00263233	35.1313	-0.0004391	35.1313	-0.000436628
					352	35.2655	-0.00191783	35.2655	-0.00178926	35.2655	-0.000499863	35.2655	-0.000442491	35.2655	-0.000123674	35.2655	-0.000103722	35.2655	-0.000325107	35.2655	-0.000479014	35.2655	1.930233832531233e-05	35.2655	-0.00012609	35.2655	0.000172395	35.2655	7.295854331085261e-05	35.2655	-0.000364749	35.2655	-0.000475957	35.2655	-1.52e-06	35.2655	-5.43e-05	35.2655	-0.000220456	35.2655	-0.000104662	35.2655	-0.00353075	35.2655	-0.00268698	35.2655	-0.000489142	35.2655	-0.000405887
					353	35.4082	-0.00178133	35.4082	-0.00173921	35.4082	-0.000636558	35.4082	-0.000525215	35.4082	-0.000157873	35.4082	-0.000106467	35.4082	-0.000410064	35.4082	-0.000542501	35.4082	0.000117263	35.4082	-2.18e-05	35.4082	0.000107239	35.4082	6.214921337466262e-05	35.4082	-0.000492116	35.4082	-0.000530675	35.4082	6.755217496872703e-05	35.4082	4.640937816371635e-06	35.4082	-4.67e-05	35.4082	-0.000166044	35.4082	-0.00345493	35.4082	-0.00251863	35.4082	-0.00046138	35.4082	-0.000369959
					354	35.5599	-0.00184384	35.5599	-0.00177322	35.5599	-0.000561222	35.5599	-0.000445884	35.5599	-0.000132505	35.5599	-4.16e-05	35.5599	-0.000425731	35.5599	-0.000558773	35.5599	4.583062435750663e-05	35.5599	-0.000116585	35.5599	1.9597117246347717e-05	35.5599	4.0666741257577854e-05	35.5599	-0.000475555	35.5599	-0.000509166	35.5599	2.6746781931859774e-05	35.5599	4.8074788838656235e-06	35.5599	-0.000167909	35.5599	-6.02e-05	35.5599	-0.00356344	35.5599	-0.00264937	35.5599	-0.000450341	35.5599	-0.000359528
					355	35.7211	-0.00183624	35.7211	-0.00172869	35.7211	-0.000510082	35.7211	-0.000436098	35.7211	-0.000119179	35.7211	-0.000160407	35.7211	-0.000332179	35.7211	-0.000485583	35.7211	3.05804987468575e-05	35.7211	-0.000134952	35.7211	0.000142266	35.7211	4.7961735286261575e-05	35.7211	-0.000422664	35.7211	-0.000477991	35.7211	9.390093143146565e-05	35.7211	3.8478843551159256e-05	35.7211	-0.000185332	35.7211	-8.35e-05	35.7211	-0.00363027	35.7211	-0.00267437	35.7211	-0.00040669	35.7211	-0.000353473
					356	35.8925	-0.00188672	35.8925	-0.00181565	35.8925	-0.000586634	35.8925	-0.000471224	35.8925	-4.35e-05	35.8925	-9.12e-05	35.8925	-0.00026718	35.8925	-0.000477982	35.8925	7.231253134542138e-05	35.8925	-7.2e-05	35.8925	8.602497955672445e-05	35.8925	6.166269400803559e-05	35.8925	-0.000341075	35.8925	-0.000452872	35.8925	0.000160981	35.8925	0.00012251	35.8925	-0.000258622	35.8925	-0.000153109	35.8925	-0.00353863	35.8925	-0.00268086	35.8925	-0.00046579	35.8925	-0.000461823
					357	36.0747	-0.00188241	36.0747	-0.00179455	36.0747	-0.000529657	36.0747	-0.000357872	36.0747	-2.03e-05	36.0747	-7.16e-05	36.0747	-0.000411821	36.0747	-0.00053431	36.0747	8.238589606624391e-05	36.0747	-4.12e-05	36.0747	0.000172519	36.0747	8.385664753457478e-05	36.0747	-0.000454989	36.0747	-0.00054796	36.0747	9.465040694986394e-05	36.0747	1.4582303643045566e-05	36.0747	-0.000204994	36.0747	-0.000116078	36.0747	-0.00354536	36.0747	-0.00266878	36.0747	-0.000611931	36.0747	-0.00043222
					358	36.2684	-0.00183872	36.2684	-0.00178274	36.2684	-0.000503895	36.2684	-0.000427809	36.2684	-6.45e-05	36.2684	-9.48e-05	36.2684	-0.000338702	36.2684	-0.000483164	36.2684	4.480619094538677e-05	36.2684	-7.75e-05	36.2684	0.000152613	36.2684	2.5279929408206225e-05	36.2684	-0.000473089	36.2684	-0.00050319	36.2684	0.000117914	36.2684	6.841345372896393e-05	36.2684	-0.000124315	36.2684	-8.88e-05	36.2684	-0.00356499	36.2684	-0.00264259	36.2684	-0.000539198	36.2684	-0.000452605
					359	36.4743	-0.00195793	36.4743	-0.00182336	36.4743	-0.000597661	36.4743	-0.000474976	36.4743	-2.59e-05	36.4743	-0.000154408	36.4743	-0.000363121	36.4743	-0.00046317	36.4743	9.581354325341029e-06	36.4743	-0.000176538	36.4743	0.00015266	36.4743	9.710144512203867e-05	36.4743	-0.000395417	36.4743	-0.000535778	36.4743	8.546072084735152e-05	36.4743	1.883786379023103e-05	36.4743	-0.000244431	36.4743	-0.000141617	36.4743	-0.00360359	36.4743	-0.00273643	36.4743	-0.000561287	36.4743	-0.000414332
					360	36.6931	-0.00186533	36.6931	-0.00177875	36.6931	-0.000546443	36.6931	-0.000357702	36.6931	1.2383050180995135e-06	36.6931	-4.16e-05	36.6931	-0.000290671	36.6931	-0.000432476	36.6931	8.378881712843783e-05	36.6931	-4.7e-05	36.6931	4.788615427699788e-05	36.6931	5.2958656070301036e-05	36.6931	-0.000386548	36.6931	-0.000428078	36.6931	0.000142493	36.6931	3.877404614435927e-05	36.6931	-0.000178694	36.6931	-7.48e-05	36.6931	-0.00372035	36.6931	-0.00279217	36.6931	-0.000502578	36.6931	-0.000368993
					361	36.9258	-0.00194344	36.9258	-0.00181829	36.9258	-0.000481879	36.9258	-0.00041791	36.9258	3.601264051363625e-05	36.9258	-7.03e-05	36.9258	-0.0003196	36.9258	-0.000422986	36.9258	1.3237329395979821e-05	36.9258	-0.000132552	36.9258	9.728712464218692e-05	36.9258	8.650024840223258e-05	36.9258	-0.000490526	36.9258	-0.000539111	36.9258	0.000158316	36.9258	2.0640370801006808e-05	36.9258	-0.00011924	36.9258	-3.89e-05	36.9258	-0.00353903	36.9258	-0.00269266	36.9258	-0.000442741	36.9258	-0.000407431
					362	37.1731	-0.001923	37.1731	-0.00189077	37.1731	-0.000460211	37.1731	-0.000425343	37.1731	-3.1e-06	37.1731	-7.18e-05	37.1731	-0.000401499	37.1731	-0.000507541	37.1731	0.000157612	37.1731	-5.66e-05	37.1731	0.000199933	37.1731	7.67248365612927e-05	37.1731	-0.000518089	37.1731	-0.0005586	37.1731	0.000113971	37.1731	3.789216584879247e-05	37.1731	-0.000101625	37.1731	-7.92e-06	37.1731	-0.0037316	37.1731	-0.00280181	37.1731	-0.000376786	37.1731	-0.000361866
					363	37.4361	-0.00187406	37.4361	-0.00181257	37.4361	-0.000649135	37.4361	-0.000495281	37.4361	-0.000120499	37.4361	-8.85e-05	37.4361	-0.000360508	37.4361	-0.000508566	37.4361	0.000159615	37.4361	-3.6e-05	37.4361	0.000113746	37.4361	9.135879405858249e-05	37.4361	-0.000402407	37.4361	-0.000398684	37.4361	0.000120285	37.4361	9.315319336135677e-05	37.4361	-0.000254645	37.4361	-0.000101599	37.4361	-0.00367756	37.4361	-0.00273191	37.4361	-0.000509029	37.4361	-0.000462644
					364	37.7155	-0.00184601	37.7155	-0.00186145	37.7155	-0.00061747	37.7155	-0.000504383	37.7155	-4.86e-05	37.7155	-6.32e-05	37.7155	-0.000431235	37.7155	-0.000496785	37.7155	0.000140859	37.7155	-3.92e-05	37.7155	0.000152516	37.7155	7.136894118242587e-05	37.7155	-0.000347179	37.7155	-0.000483839	37.7155	7.174033051264854e-05	37.7155	1.6959131412825484e-05	37.7155	-0.000156388	37.7155	-4.07e-05	37.7155	-0.00365939	37.7155	-0.00279261	37.7155	-0.000420304	37.7155	-0.000367874
					365	38.0126	-0.00200181	38.0126	-0.00190212	38.0126	-0.000497445	38.0126	-0.000413449	38.0126	-8.19e-06	38.0126	-1.69e-05	38.0126	-0.000245961	38.0126	-0.000380897	38.0126	9.370997890359879e-05	38.0126	-2.2e-05	38.0126	5.240715340363439e-05	38.0126	6.772978259694806e-05	38.0126	-0.000421355	38.0126	-0.000480459	38.0126	8.1139725629576e-05	38.0126	4.1370639894363834e-05	38.0126	-0.000120429	38.0126	-5.32e-05	38.0126	-0.00377965	38.0126	-0.00285963	38.0126	-0.00040117	38.0126	-0.000412284
					366	48.0628	-0.00254978	48.0628	-0.00241245	48.0628	-0.000661804	48.0628	-0.000530442	48.0628	9.747470053671691e-05	48.0628	-9.21e-06	48.0628	-0.000303994	48.0628	-0.000477518	48.0628	0.000244943	48.0628	9.450338550386767e-06	48.0628	0.000295536	48.0628	0.000176706	48.0628	-0.000103567	48.0628	-0.000356618	48.0628	0.00045498	48.0628	0.000213881	48.0628	-0.00013163	48.0628	-0.000109196	48.0628	-0.00475008	48.0628	-0.00368614	48.0628	-0.000537677	48.0628	-0.00057405
					367	48.113	-0.00256686	48.113	-0.00248447	48.113	-0.000700666	48.113	-0.000525223	48.113	6.96773185776111e-05	48.113	3.7644061917947204e-05	48.113	-0.000384433	48.113	-0.00056496	48.113	0.00018352	48.113	-1.06e-06	48.113	0.00018284	48.113	0.000104595	48.113	-0.000337909	48.113	-0.000475448	48.113	0.000371015	48.113	0.00015512	48.113	-0.000205885	48.113	-0.000113451	48.113	-0.00482321	48.113	-0.0037134	48.113	-0.000618117	48.113	-0.000595413
					368	48.1632	-0.00269228	48.1632	-0.00255665	48.1632	-0.000775019	48.1632	-0.000579489	48.1632	6.288472577992013e-05	48.1632	-5.85e-05	48.1632	-0.000400334	48.1632	-0.000582163	48.1632	7.074910495940309e-05	48.1632	-0.000158128	48.1632	0.000259911	48.1632	0.000114739	48.1632	-0.000363418	48.1632	-0.000490788	48.1632	0.000286866	48.1632	0.000107735	48.1632	-0.000370794	48.1632	-0.000218877	48.1632	-0.00485305	48.1632	-0.00370397	48.1632	-0.000633506	48.1632	-0.000623888
					369	48.2135	-0.00267712	48.2135	-0.00256015	48.2135	-0.000760009	48.2135	-0.000580072	48.2135	-6.53e-05	48.2135	-9.7e-05	48.2135	-0.000511527	48.2135	-0.000637946	48.2135	1.7374127167005997e-05	48.2135	-0.000166377	48.2135	0.000134621	48.2135	5.725049808408267e-05	48.2135	-0.000408927	48.2135	-0.000583999	48.2135	0.000244301	48.2135	9.026311761505326e-05	48.2135	-0.000316327	48.2135	-0.000194954	48.2135	-0.00497258	48.2135	-0.00379426	48.2135	-0.000674069	48.2135	-0.000584271
					370	48.2637	-0.00277861	48.2637	-0.00257837	48.2637	-0.000750598	48.2637	-0.00061557	48.2637	-7.91e-05	48.2637	-0.000103909	48.2637	-0.000454312	48.2637	-0.00057519	48.2637	-0.000101441	48.2637	-0.000199109	48.2637	2.39670211400686e-05	48.2637	9.605864046746682e-06	48.2637	-0.000359529	48.2637	-0.000487916	48.2637	0.000141113	48.2637	1.7186284079215644e-05	48.2637	-0.000421323	48.2637	-0.000303512	48.2637	-0.0050362	48.2637	-0.00387997	48.2637	-0.000732541	48.2637	-0.000679636
					371	48.3139	-0.00270105	48.3139	-0.00255764	48.3139	-0.000789801	48.3139	-0.000622839	48.3139	-9.45e-05	48.3139	-0.00012535	48.3139	-0.00043689	48.3139	-0.00056492	48.3139	-0.000161467	48.3139	-0.000224471	48.3139	9.981730774794029e-05	48.3139	2.738722795425641e-05	48.3139	-0.000413837	48.3139	-0.000568805	48.3139	0.000183618	48.3139	1.8409475085684815e-05	48.3139	-0.000365215	48.3139	-0.000229781	48.3139	-0.00495625	48.3139	-0.00380582	48.3139	-0.000842718	48.3139	-0.000768344
					372	48.3641	-0.00277108	48.3641	-0.00258767	48.3641	-0.000908247	48.3641	-0.000718754	48.3641	-0.000127099	48.3641	-0.000177061	48.3641	-0.00043952	48.3641	-0.00059705	48.3641	4.798990824595849e-07	48.3641	-0.000190572	48.3641	8.285431980836061e-05	48.3641	1.5906879712646038e-05	48.3641	-0.000405946	48.3641	-0.000494584	48.3641	0.00015945	48.3641	4.961891538698797e-05	48.3641	-0.00038573	48.3641	-0.000233799	48.3641	-0.00506931	48.3641	-0.00392971	48.3641	-0.00067615	48.3641	-0.000658015
					373	48.4143	-0.00279272	48.4143	-0.00264455	48.4143	-0.000838052	48.4143	-0.000696362	48.4143	-7.73e-05	48.4143	-0.000164947	48.4143	-0.000433118	48.4143	-0.00058213	48.4143	-2e-05	48.4143	-0.000200641	48.4143	0.000147609	48.4143	4.635056476565147e-05	48.4143	-0.000414441	48.4143	-0.000609462	48.4143	0.000183915	48.4143	-8.24e-06	48.4143	-0.000289649	48.4143	-0.000263462	48.4143	-0.00508124	48.4143	-0.00389436	48.4143	-0.000706203	48.4143	-0.000657269
					374	48.4645	-0.00279538	48.4645	-0.00262792	48.4645	-0.000922835	48.4645	-0.000740203	48.4645	-0.00021817	48.4645	-0.000251804	48.4645	-0.000414806	48.4645	-0.000599933	48.4645	4.965814770497754e-05	48.4645	-0.000182727	48.4645	0.00010497	48.4645	1.9722690451806635e-05	48.4645	-0.000379583	48.4645	-0.00053963	48.4645	0.00010017	48.4645	1.1213281705460543e-06	48.4645	-0.000344766	48.4645	-0.000244659	48.4645	-0.00505408	48.4645	-0.00391356	48.4645	-0.000836443	48.4645	-0.000792037
					375	48.5147	-0.00273792	48.5147	-0.00262149	48.5147	-0.000901411	48.5147	-0.000715628	48.5147	-0.000181917	48.5147	-0.000191353	48.5147	-0.000506816	48.5147	-0.000630041	48.5147	-5.27e-06	48.5147	-0.000182633	48.5147	2.4455459308805882e-05	48.5147	1.4843026872990439e-05	48.5147	-0.000349543	48.5147	-0.000563077	48.5147	3.759305395582618e-05	48.5147	-8.76e-05	48.5147	-0.00034408	48.5147	-0.00018546	48.5147	-0.00495117	48.5147	-0.00385674	48.5147	-0.000741463	48.5147	-0.000715619
					376	48.5649	-0.00280521	48.5649	-0.00263495	48.5649	-0.00082903	48.5649	-0.000639571	48.5649	-4.81e-05	48.5649	-0.000172394	48.5649	-0.000431375	48.5649	-0.000607123	48.5649	2.414813948588713e-06	48.5649	-0.000167192	48.5649	4.9633409198196476e-05	48.5649	-7.18e-06	48.5649	-0.000456608	48.5649	-0.000583868	48.5649	8.93242518976232e-05	48.5649	-8.6e-05	48.5649	-0.000392035	48.5649	-0.000271482	48.5649	-0.00505377	48.5649	-0.00392538	48.5649	-0.000827567	48.5649	-0.00068724
					377	48.6151	-0.00283902	48.6151	-0.00266074	48.6151	-0.000904833	48.6151	-0.000692617	48.6151	-0.000199666	48.6151	-0.000241118	48.6151	-0.00042303	48.6151	-0.000688014	48.6151	-0.000133786	48.6151	-0.000289653	48.6151	4.578838809103647e-05	48.6151	1.178849233435253e-05	48.6151	-0.00041499	48.6151	-0.000561892	48.6151	3.709041304381512e-05	48.6151	-7.84e-05	48.6151	-0.000347277	48.6151	-0.000283001	48.6151	-0.00506809	48.6151	-0.00392603	48.6151	-0.00077855	48.6151	-0.000683573
					378	48.6653	-0.00280951	48.6653	-0.0026454	48.6653	-0.000878269	48.6653	-0.000678271	48.6653	-3.68e-05	48.6653	-0.000177149	48.6653	-0.000547587	48.6653	-0.00067402	48.6653	-4.58e-05	48.6653	-0.000199822	48.6653	0.000115559	48.6653	3.062043616081089e-05	48.6653	-0.00046068	48.6653	-0.000613642	48.6653	0.00016751	48.6653	-1.45e-05	48.6653	-0.000361714	48.6653	-0.000238094	48.6653	-0.00502898	48.6653	-0.00392847	48.6653	-0.000800177	48.6653	-0.000724098
					379	48.7155	-0.00281944	48.7155	-0.00267463	48.7155	-0.000921153	48.7155	-0.00071035	48.7155	-0.000191011	48.7155	-0.000243903	48.7155	-0.000438107	48.7155	-0.000594809	48.7155	-1.11e-05	48.7155	-0.000216371	48.7155	7.441820763201545e-05	48.7155	4.852247821807154e-05	48.7155	-0.000522994	48.7155	-0.000604447	48.7155	-1.13e-05	48.7155	-0.000114633	48.7155	-0.000382118	48.7155	-0.000272717	48.7155	-0.00515181	48.7155	-0.00399278	48.7155	-0.000830344	48.7155	-0.000703836
					380	48.7657	-0.00280215	48.7657	-0.00265999	48.7657	-0.000907463	48.7657	-0.000797947	48.7657	-9.81e-05	48.7657	-0.000146819	48.7657	-0.000547132	48.7657	-0.000622281	48.7657	-0.000105	48.7657	-0.000257462	48.7657	9.162358093670053e-05	48.7657	-2.22e-05	48.7657	-0.000499905	48.7657	-0.000595135	48.7657	0.000120078	48.7657	-4.47e-05	48.7657	-0.00045119	48.7657	-0.00028622	48.7657	-0.00514565	48.7657	-0.00395656	48.7657	-0.000816862	48.7657	-0.000767196
					381	48.8159	-0.00288122	48.8159	-0.00273588	48.8159	-0.000895147	48.8159	-0.000738521	48.8159	-0.000122753	48.8159	-0.000197783	48.8159	-0.000489459	48.8159	-0.000655796	48.8159	5.5198976591432514e-06	48.8159	-0.000160032	48.8159	0.000147906	48.8159	6.294808040041566e-06	48.8159	-0.000462335	48.8159	-0.000552128	48.8159	0.000120195	48.8159	-1.45e-05	48.8159	-0.000397023	48.8159	-0.000220107	48.8159	-0.00503907	48.8159	-0.00392523	48.8159	-0.000826291	48.8159	-0.000766949
					382	48.8661	-0.00285085	48.8661	-0.00265282	48.8661	-0.000898196	48.8661	-0.000741413	48.8661	-3.07e-05	48.8661	-0.000144422	48.8661	-0.000428198	48.8661	-0.000613128	48.8661	-3.2e-05	48.8661	-0.000184066	48.8661	-3.04e-05	48.8661	-1.44e-05	48.8661	-0.000412532	48.8661	-0.000543183	48.8661	8.328522455282815e-05	48.8661	-5.37e-05	48.8661	-0.000359234	48.8661	-0.000286741	48.8661	-0.00506681	48.8661	-0.00385905	48.8661	-0.00078538	48.8661	-0.000723237
					383	48.9163	-0.00285747	48.9163	-0.00268461	48.9163	-0.000854468	48.9163	-0.000723485	48.9163	-0.000174323	48.9163	-0.000203682	48.9163	-0.000447331	48.9163	-0.000601156	48.9163	-0.000106603	48.9163	-0.000278366	48.9163	0.000138489	48.9163	2.1764663985845978e-05	48.9163	-0.000475722	48.9163	-0.000604738	48.9163	0.000126657	48.9163	-7.53e-05	48.9163	-0.000336169	48.9163	-0.000297293	48.9163	-0.00506926	48.9163	-0.00393096	48.9163	-0.000789238	48.9163	-0.000715078
					384	48.9665	-0.00272504	48.9665	-0.00262239	48.9665	-0.000944847	48.9665	-0.000751829	48.9665	-9.77e-05	48.9665	-0.000247556	48.9665	-0.000495567	48.9665	-0.000616264	48.9665	-9.29e-05	48.9665	-0.000305419	48.9665	6.94304534044482e-05	48.9665	-1.42e-05	48.9665	-0.000480272	48.9665	-0.000591705	48.9665	0.000157448	48.9665	-6.95e-06	48.9665	-0.000343378	48.9665	-0.000245525	48.9665	-0.00511822	48.9665	-0.00388426	48.9665	-0.000775455	48.9665	-0.00069906
					385	49.0167	-0.0029128	49.0167	-0.00270533	49.0167	-0.000860947	49.0167	-0.000716182	49.0167	-0.00019468	49.0167	-0.000226778	49.0167	-0.000422866	49.0167	-0.000650077	49.0167	9.300545940326213e-06	49.0167	-0.000181392	49.0167	4.5137405767538274e-05	49.0167	1.961172694653346e-05	49.0167	-0.00052445	49.0167	-0.000668932	49.0167	-3.46e-05	49.0167	-0.000118534	49.0167	-0.000409132	49.0167	-0.000313374	49.0167	-0.00507142	49.0167	-0.00394422	49.0167	-0.000771678	49.0167	-0.000753309
					386	49.0176	-0.00946268	49.0176	-0.0027249	49.0176	-0.00745044	49.0176	-0.000792489	49.0176	-0.00649074	49.0176	-0.000285716	49.0176	-0.00701319	49.0176	-0.000690244	49.0176	-0.00635098	49.0176	-0.000259917	49.0176	-0.00645947	49.0176	-3.1e-05	49.0176	-0.00666482	49.0176	-0.000628283	49.0176	-0.00605239	49.0176	-8.11e-05	49.0176	-0.00664951	49.0176	-0.000298025	49.0176	-0.0114403	49.0176	-0.00392067	49.0176	-0.0069099	49.0176	-0.000846151
					387	49.0183	-0.00923438	49.0183	-0.00247185	49.0183	-0.00711137	49.0183	-0.000498358	49.0183	-0.00621028	49.0183	7.322042044065596e-05	49.0183	-0.00658943	49.0183	-0.000380258	49.0183	-0.00611109	49.0183	4.0836858507488014e-05	49.0183	-0.0061267	49.0183	0.000145479	49.0183	-0.00638704	49.0183	-0.000417644	49.0183	-0.005679	49.0183	0.000203028	49.0183	-0.00634064	49.0183	-4.32e-05	49.0183	-0.0112649	49.0183	-0.00378902	49.0183	-0.00665633	49.0183	-0.000529027
					388	49.0191	-0.00917077	49.0191	-0.00244656	49.0191	-0.00697316	49.0191	-0.000458424	49.0191	-0.00618341	49.0191	4.419769758861984e-05	49.0191	-0.00661954	49.0191	-0.000479321	49.0191	-0.00599137	49.0191	-1.82e-05	49.0191	-0.00606942	49.0191	9.607817944584651e-05	49.0191	-0.00623219	49.0191	-0.00038718	49.0191	-0.00551625	49.0191	0.000210177	49.0191	-0.00606225	49.0191	-4.01e-05	49.0191	-0.0111348	49.0191	-0.00367873	49.0191	-0.0066217	49.0191	-0.000471912
					389	49.0199	-0.0091728	49.0199	-0.00244836	49.0199	-0.0069565	49.0199	-0.000507595	49.0199	-0.00611982	49.0199	-1.22e-05	49.0199	-0.00638398	49.0199	-0.000434443	49.0199	-0.00594904	49.0199	-8.56e-05	49.0199	-0.00586703	49.0199	9.661186577519798e-05	49.0199	-0.00599431	49.0199	-0.000340627	49.0199	-0.00539279	49.0199	0.000131954	49.0199	-0.00588699	49.0199	-6.33e-05	49.0199	-0.0111323	49.0199	-0.00378871	49.0199	-0.00654798	49.0199	-0.000573889
					390	49.0208	-0.00894432	49.0208	-0.0023543	49.0208	-0.00690376	49.0208	-0.000506775	49.0208	-0.00604126	49.0208	-5.11e-05	49.0208	-0.00632163	49.0208	-0.000483682	49.0208	-0.00568062	49.0208	-1.53e-05	49.0208	-0.0055649	49.0208	0.000151269	49.0208	-0.00579449	49.0208	-0.000320425	49.0208	-0.00512818	49.0208	0.000215821	49.0208	-0.00567973	49.0208	-5.41e-05	49.0208	-0.0109929	49.0208	-0.00376202	49.0208	-0.00646708	49.0208	-0.000507403
					391	49.0218	-0.00909772	49.0218	-0.00252405	49.0218	-0.00684151	49.0218	-0.000549857	49.0218	-0.00581325	49.0218	6.341794409168641e-06	49.0218	-0.00606804	49.0218	-0.000428198	49.0218	-0.00563214	49.0218	-8.8e-05	49.0218	-0.00550616	49.0218	0.000131786	49.0218	-0.00565023	49.0218	-0.000426079	49.0218	-0.00497015	49.0218	0.000213699	49.0218	-0.00544085	49.0218	-7.72e-05	49.0218	-0.0108928	49.0218	-0.00370976	49.0218	-0.00627493	49.0218	-0.000523915
					392	49.0228	-0.0088468	49.0228	-0.00241097	49.0228	-0.00665843	49.0228	-0.000457017	49.0228	-0.0058183	49.0228	-1.65e-05	49.0228	-0.00598314	49.0228	-0.000393097	49.0228	-0.00543559	49.0228	-9.69e-05	49.0228	-0.00534813	49.0228	0.000107549	49.0228	-0.00548114	49.0228	-0.000438955	49.0228	-0.00490877	49.0228	9.759314222461575e-05	49.0228	-0.00522579	49.0228	-0.000117191	49.0228	-0.0109014	49.0228	-0.00373471	49.0228	-0.00626631	49.0228	-0.000495627
					393	49.0239	-0.00871728	49.0239	-0.0024564	49.0239	-0.00659317	49.0239	-0.000497083	49.0239	-0.00557917	49.0239	2.9798374591486453e-05	49.0239	-0.00578822	49.0239	-0.000389697	49.0239	-0.00523836	49.0239	-4.69e-05	49.0239	-0.00502613	49.0239	0.000185712	49.0239	-0.00528983	49.0239	-0.000348733	49.0239	-0.00455263	49.0239	0.000209978	49.0239	-0.00513098	49.0239	-9.71e-05	49.0239	-0.0106926	49.0239	-0.00363159	49.0239	-0.00616903	49.0239	-0.000474744
					394	49.025	-0.00867691	49.025	-0.00248403	49.025	-0.00642058	49.025	-0.000454943	49.025	-0.00546284	49.025	-3.89e-05	49.025	-0.0057142	49.025	-0.000411922	49.025	-0.005086	49.025	-7.1e-05	49.025	-0.00478692	49.025	0.000154645	49.025	-0.00510466	49.025	-0.00041401	49.025	-0.00445386	49.025	8.206036469982601e-05	49.025	-0.00486838	49.025	-0.000112823	49.025	-0.0106498	49.025	-0.00366201	49.025	-0.00600673	49.025	-0.000483138
					395	49.0262	-0.00861358	49.0262	-0.00243001	49.0262	-0.00635056	49.0262	-0.000487354	49.0262	-0.00533169	49.0262	-9.76e-06	49.0262	-0.00563176	49.0262	-0.000522598	49.0262	-0.00487539	49.0262	-4.47e-05	49.0262	-0.00465907	49.0262	0.000150457	49.0262	-0.00484091	49.0262	-0.000348732	49.0262	-0.00416397	49.0262	0.000202419	49.0262	-0.00462719	49.0262	-7.63e-05	49.0262	-0.0106364	49.0262	-0.00367467	49.0262	-0.0058553	49.0262	-0.000480045
					396	49.0275	-0.00846511	49.0275	-0.00239827	49.0275	-0.00632412	49.0275	-0.000494239	49.0275	-0.0051718	49.0275	4.574561577926073e-05	49.0275	-0.00542468	49.0275	-0.000425764	49.0275	-0.00467407	49.0275	-1.81e-05	49.0275	-0.00458141	49.0275	0.000113018	49.0275	-0.00454239	49.0275	-0.000352839	49.0275	-0.00403832	49.0275	0.000106325	49.0275	-0.00437292	49.0275	2.9235203986496816e-06	49.0275	-0.0104632	49.0275	-0.00368473	49.0275	-0.00581649	49.0275	-0.000543175
					397	49.0289	-0.0083829	49.0289	-0.00242671	49.0289	-0.00621399	49.0289	-0.000543532	49.0289	-0.00518223	49.0289	-3.21e-05	49.0289	-0.00514731	49.0289	-0.000382259	49.0289	-0.00458413	49.0289	-1.94e-05	49.0289	-0.0042363	49.0289	0.000141009	49.0289	-0.00453283	49.0289	-0.000304934	49.0289	-0.00372956	49.0289	0.000201096	49.0289	-0.00429158	49.0289	-0.000120973	49.0289	-0.010391	49.0289	-0.0036516	49.0289	-0.00569679	49.0289	-0.000477906
					398	49.0303	-0.00833505	49.0303	-0.00241906	49.0303	-0.00608008	49.0303	-0.000494669	49.0303	-0.0048208	49.0303	4.8214111712202405e-05	49.0303	-0.00508475	49.0303	-0.000446253	49.0303	-0.00427358	49.0303	-6.72e-06	49.0303	-0.00411175	49.0303	0.00015228	49.0303	-0.0042224	49.0303	-0.000391451	49.0303	-0.00352827	49.0303	0.000176475	49.0303	-0.00402583	49.0303	-0.000127284	49.0303	-0.0101942	49.0303	-0.0036635	49.0303	-0.00552666	49.0303	-0.000432938
					399	49.0319	-0.0081226	49.0319	-0.00235918	49.0319	-0.00598836	49.0319	-0.000522023	49.0319	-0.00487494	49.0319	-2.24e-05	49.0319	-0.00488153	49.0319	-0.000376203	49.0319	-0.00410464	49.0319	3.838873107525273e-05	49.0319	-0.00390821	49.0319	0.000110713	49.0319	-0.00403581	49.0319	-0.000324971	49.0319	-0.00348636	49.0319	0.000131204	49.0319	-0.00380508	49.0319	-0.000104255	49.0319	-0.0101492	49.0319	-0.0036389	49.0319	-0.00534941	49.0319	-0.000467958
					400	49.0335	-0.00808909	49.0335	-0.00238483	49.0335	-0.00588851	49.0335	-0.000488545	49.0335	-0.0046409	49.0335	3.2262363718190898e-06	49.0335	-0.00469172	49.0335	-0.000415714	49.0335	-0.00403239	49.0335	-3.62e-05	49.0335	-0.0036859	49.0335	0.000146828	49.0335	-0.00390578	49.0335	-0.000358224	49.0335	-0.00326682	49.0335	0.000147367	49.0335	-0.00362381	49.0335	-6.96e-05	49.0335	-0.0100745	49.0335	-0.00363759	49.0335	-0.00536014	49.0335	-0.000443775
					401	49.0353	-0.00796594	49.0353	-0.00235728	49.0353	-0.00563116	49.0353	-0.00041424	49.0353	-0.00450244	49.0353	2.9595008617475105e-05	49.0353	-0.00461804	49.0353	-0.000440055	49.0353	-0.00388344	49.0353	-4.2e-05	49.0353	-0.003548	49.0353	0.000180387	49.0353	-0.00380399	49.0353	-0.000476184	49.0353	-0.00301804	49.0353	0.000124818	49.0353	-0.0034526	49.0353	-0.000121722	49.0353	-0.00994744	49.0353	-0.00363805	49.0353	-0.0052967	49.0353	-0.000533212
					402	49.0371	-0.00791457	49.0371	-0.00241513	49.0371	-0.00560225	49.0371	-0.000489987	49.0371	-0.00437047	49.0371	-2.28e-05	49.0371	-0.00435388	49.0371	-0.000433916	49.0371	-0.00364199	49.0371	-0.00010699	49.0371	-0.00332233	49.0371	0.00012941	49.0371	-0.00361287	49.0371	-0.000401893	49.0371	-0.00285552	49.0371	0.000164396	49.0371	-0.00322659	49.0371	-8.31e-05	49.0371	-0.00984185	49.0371	-0.00363545	49.0371	-0.00516119	49.0371	-0.000537389
					403	49.0391	-0.0077852	49.0391	-0.00239938	49.0391	-0.00544906	49.0391	-0.00051899	49.0391	-0.00416903	49.0391	-1.52e-05	49.0391	-0.00414441	49.0391	-0.000432499	49.0391	-0.00347502	49.0391	-8.84e-05	49.0391	-0.0031606	49.0391	0.00012853	49.0391	-0.00350574	49.0391	-0.000428555	49.0391	-0.00266295	49.0391	0.000129603	49.0391	-0.00308804	49.0391	-6.61e-05	49.0391	-0.0098219	49.0391	-0.00373333	49.0391	-0.0050357	49.0391	-0.000546952
					404	49.0412	-0.00768781	49.0412	-0.00244789	49.0412	-0.00540186	49.0412	-0.000484513	49.0412	-0.00399941	49.0412	2.2340302797755653e-05	49.0412	-0.00402676	49.0412	-0.000375723	49.0412	-0.00334916	49.0412	-0.000130337	49.0412	-0.00297141	49.0412	0.000142933	49.0412	-0.00320255	49.0412	-0.000372759	49.0412	-0.00252081	49.0412	0.000162892	49.0412	-0.0029109	49.0412	-0.000130665	49.0412	-0.00968992	49.0412	-0.00371834	49.0412	-0.00478044	49.0412	-0.000461524
					405	49.0435	-0.00760899	49.0435	-0.00245909	49.0435	-0.00517198	49.0435	-0.000421941	49.0435	-0.00387872	49.0435	-1.2e-05	49.0435	-0.00392157	49.0435	-0.000518459	49.0435	-0.00307581	49.0435	-5.82e-05	49.0435	-0.00288805	49.0435	0.000117056	49.0435	-0.00308162	49.0435	-0.000396759	49.0435	-0.00244968	49.0435	0.000100388	49.0435	-0.002754	49.0435	-9.58e-05	49.0435	-0.0095636	49.0435	-0.00371808	49.0435	-0.00460427	49.0435	-0.000504287
					406	49.0458	-0.00735239	49.0458	-0.00236652	49.0458	-0.00504793	49.0458	-0.000461334	49.0458	-0.0037387	49.0458	2.8999232298561502e-05	49.0458	-0.00373143	49.0458	-0.000496366	49.0458	-0.00301553	49.0458	-6.56e-05	49.0458	-0.00270545	49.0458	8.511533015442829e-05	49.0458	-0.00284352	49.0458	-0.000364112	49.0458	-0.00218141	49.0458	8.038613040207802e-05	49.0458	-0.00267414	49.0458	-0.000211214	49.0458	-0.00943823	49.0458	-0.00375171	49.0458	-0.0046056	49.0458	-0.00054064
					407	49.0484	-0.00736616	49.0484	-0.00247203	49.0484	-0.0049018	49.0484	-0.000493641	49.0484	-0.00355096	49.0484	1.5609536431048648e-07	49.0484	-0.00348701	49.0484	-0.000413972	49.0484	-0.0027494	49.0484	-2.6e-05	49.0484	-0.00245134	49.0484	0.000146562	49.0484	-0.00281471	49.0484	-0.0004818	49.0484	-0.00201362	49.0484	0.000147466	49.0484	-0.00248706	49.0484	-0.00012884	49.0484	-0.00927186	49.0484	-0.00369071	49.0484	-0.00435567	49.0484	-0.000510886
					408	49.0511	-0.00705916	49.0511	-0.00237506	49.0511	-0.00472168	49.0511	-0.000547427	49.0511	-0.00341732	49.0511	-5.73e-05	49.0511	-0.00336184	49.0511	-0.000409337	49.0511	-0.00262879	49.0511	-0.000136762	49.0511	-0.00225797	49.0511	0.000120233	49.0511	-0.00250473	49.0511	-0.000436184	49.0511	-0.00192853	49.0511	8.666072821971078e-05	49.0511	-0.00227961	49.0511	-8.9e-05	49.0511	-0.00912337	49.0511	-0.00367201	49.0511	-0.00432159	49.0511	-0.000553806
					409	49.0539	-0.00694264	49.0539	-0.00240398	49.0539	-0.00463331	49.0539	-0.000493486	49.0539	-0.00311601	49.0539	-3.81e-05	49.0539	-0.00319332	49.0539	-0.000472233	49.0539	-0.00250978	49.0539	-4.9e-05	49.0539	-0.00208721	49.0539	0.000126689	49.0539	-0.00240549	49.0539	-0.000404583	49.0539	-0.0017593	49.0539	0.000115676	49.0539	-0.00224817	49.0539	-0.000143167	49.0539	-0.00905132	49.0539	-0.00379395	49.0539	-0.00418662	49.0539	-0.000589521
					410	49.0569	-0.00680888	49.0569	-0.00238521	49.0569	-0.00440009	49.0569	-0.00046779	49.0569	-0.00302359	49.0569	6.195348931093726e-06	49.0569	-0.00302451	49.0569	-0.000444726	49.0569	-0.00226312	49.0569	-3.73e-05	49.0569	-0.00195876	49.0569	0.000126768	49.0569	-0.00224252	49.0569	-0.00043821	49.0569	-0.00172609	49.0569	6.481556109446708e-05	49.0569	-0.00211323	49.0569	-0.000197178	49.0569	-0.00893824	49.0569	-0.00377133	49.0569	-0.00402258	49.0569	-0.00061384
					411	49.0602	-0.00667728	49.0602	-0.00250179	49.0602	-0.00429638	49.0602	-0.000529276	49.0602	-0.00292056	49.0602	-2.5e-06	49.0602	-0.00281543	49.0602	-0.000453946	49.0602	-0.00212654	49.0602	-6.48e-05	49.0602	-0.00189572	49.0602	9.305171042550686e-05	49.0602	-0.00207572	49.0602	-0.000375449	49.0602	-0.00152622	49.0602	8.909923230914114e-05	49.0602	-0.00209737	49.0602	-0.000253019	49.0602	-0.00870145	49.0602	-0.00375811	49.0602	-0.00387351	49.0602	-0.000577073
					412	49.0636	-0.00650654	49.0636	-0.00244518	49.0636	-0.00416641	49.0636	-0.000516103	49.0636	-0.00270241	49.0636	-3.59e-06	49.0636	-0.00263754	49.0636	-0.000472567	49.0636	-0.00198467	49.0636	-0.000137859	49.0636	-0.00178249	49.0636	7.242920431904665e-05	49.0636	-0.00211393	49.0636	-0.000440901	49.0636	-0.0013827	49.0636	9.573155109136519e-05	49.0636	-0.00196993	49.0636	-0.000255958	49.0636	-0.00861666	49.0636	-0.00371695	49.0636	-0.00376387	49.0636	-0.000612492
					413	49.0672	-0.00635037	49.0672	-0.00245117	49.0672	-0.00404335	49.0672	-0.000607692	49.0672	-0.00265575	49.0672	-9.99e-05	49.0672	-0.0025242	49.0672	-0.000497592	49.0672	-0.00182844	49.0672	-0.000114168	49.0672	-0.00168468	49.0672	8.489303734393605e-05	49.0672	-0.00199983	49.0672	-0.000502838	49.0672	-0.00132651	49.0672	9.007210785949397e-05	49.0672	-0.00182478	49.0672	-0.000240738	49.0672	-0.00833159	49.0672	-0.0037155	49.0672	-0.00354784	49.0672	-0.000612083
					414	49.0711	-0.00627858	49.0711	-0.00242856	49.0711	-0.00390548	49.0711	-0.000570382	49.0711	-0.00243841	49.0711	-8.11e-05	49.0711	-0.00232247	49.0711	-0.000438296	49.0711	-0.0018031	49.0711	-0.000159799	49.0711	-0.00145892	49.0711	6.036318338559221e-05	49.0711	-0.00182227	49.0711	-0.000415788	49.0711	-0.00113532	49.0711	8.521675940116255e-05	49.0711	-0.00169	49.0711	-0.000158105	49.0711	-0.00829556	49.0711	-0.00377163	49.0711	-0.00344691	49.0711	-0.000615921
					415	49.0752	-0.00613521	49.0752	-0.00249925	49.0752	-0.00364115	49.0752	-0.000537818	49.0752	-0.0022593	49.0752	-5.29e-05	49.0752	-0.00229772	49.0752	-0.00053281	49.0752	-0.00153543	49.0752	-0.000118031	49.0752	-0.00131383	49.0752	6.419993076350883e-05	49.0752	-0.00162409	49.0752	-0.000435067	49.0752	-0.00120839	49.0752	-1.02e-05	49.0752	-0.00155631	49.0752	-0.000177716	49.0752	-0.00809395	49.0752	-0.00372652	49.0752	-0.00324977	49.0752	-0.000573457
					416	49.0796	-0.00601595	49.0796	-0.00253472	49.0796	-0.00350671	49.0796	-0.000528189	49.0796	-0.00209913	49.0796	-8.96e-05	49.0796	-0.00214897	49.0796	-0.000514838	49.0796	-0.00142051	49.0796	-9.79e-05	49.0796	-0.001189	49.0796	7.929795370881232e-05	49.0796	-0.00164739	49.0796	-0.000539058	49.0796	-0.00107059	49.0796	-2.76e-05	49.0796	-0.00159543	49.0796	-0.000274417	49.0796	-0.00795368	49.0796	-0.00374899	49.0796	-0.00316877	49.0796	-0.000691609
					417	49.0843	-0.00575123	49.0843	-0.00248627	49.0843	-0.00331561	49.0843	-0.000553924	49.0843	-0.00188199	49.0843	-0.000121951	49.0843	-0.00206237	49.0843	-0.000620486	49.0843	-0.0013555	49.0843	-0.000104681	49.0843	-0.00114744	49.0843	7.43781650631159e-05	49.0843	-0.0015625	49.0843	-0.000511676	49.0843	-0.000908213	49.0843	9.21876305236928e-05	49.0843	-0.00146291	49.0843	-0.000295244	49.0843	-0.00776335	49.0843	-0.00373107	49.0843	-0.00293527	49.0843	-0.000599905
					418	49.0892	-0.00567958	49.0892	-0.00254961	49.0892	-0.00330951	49.0892	-0.000626123	49.0892	-0.00175942	49.0892	-0.000140372	49.0892	-0.00178268	49.0892	-0.000515811	49.0892	-0.00123632	49.0892	-0.000100842	49.0892	-0.000964404	49.0892	9.626003717205789e-05	49.0892	-0.00137515	49.0892	-0.000487121	49.0892	-0.000830237	49.0892	1.620896816386004e-05	49.0892	-0.00136053	49.0892	-0.000259266	49.0892	-0.00760665	49.0892	-0.00375461	49.0892	-0.00278656	49.0892	-0.000663675
					419	49.0945	-0.00551354	49.0945	-0.00256915	49.0945	-0.00297302	49.0945	-0.000525202	49.0945	-0.00161183	49.0945	-9.11e-05	49.0945	-0.00168503	49.0945	-0.000509572	49.0945	-0.00116529	49.0945	-0.000111692	49.0945	-0.00101503	49.0945	5.530880306880981e-05	49.0945	-0.00134647	49.0945	-0.000520648	49.0945	-0.000696282	49.0945	3.0145163841603997e-05	49.0945	-0.00133493	49.0945	-0.00022919	49.0945	-0.00747366	49.0945	-0.0038453	49.0945	-0.0026743	49.0945	-0.000669152
					420	49.1001	-0.00528906	49.1001	-0.00252212	49.1001	-0.00288954	49.1001	-0.000625434	49.1001	-0.0014735	49.1001	-7.48e-05	49.1001	-0.00168052	49.1001	-0.000643955	49.1001	-0.000971423	49.1001	-0.000125931	49.1001	-0.000699212	49.1001	0.000100658	49.1001	-0.00129963	49.1001	-0.000524054	49.1001	-0.00071392	49.1001	1.8192097438363142e-05	49.1001	-0.00117458	49.1001	-0.000189897	49.1001	-0.00738259	49.1001	-0.00380402	49.1001	-0.00254484	49.1001	-0.000578362
					421	49.106	-0.00510733	49.106	-0.00250463	49.106	-0.00281301	49.106	-0.00067099	49.106	-0.00130756	49.106	-8.42e-05	49.106	-0.00151969	49.106	-0.000571182	49.106	-0.000875225	49.106	-0.000115773	49.106	-0.000715447	49.106	7.589506762623044e-05	49.106	-0.00113147	49.106	-0.000404588	49.106	-0.000631231	49.106	-3.95e-05	49.106	-0.00103218	49.106	-0.000180239	49.106	-0.00717521	49.106	-0.00379937	49.106	-0.00232484	49.106	-0.000590183
					422	49.1123	-0.00499927	49.1123	-0.00257551	49.1123	-0.00262647	49.1123	-0.00064997	49.1123	-0.00131149	49.1123	-0.000161357	49.1123	-0.00133463	49.1123	-0.00054092	49.1123	-0.000894524	49.1123	-0.000210207	49.1123	-0.000638576	49.1123	6.449833328880938e-05	49.1123	-0.00103775	49.1123	-0.000424045	49.1123	-0.000513345	49.1123	6.900907574361806e-06	49.1123	-0.000980065	49.1123	-0.000159342	49.1123	-0.00712666	49.1123	-0.0039122	49.1123	-0.00224262	49.1123	-0.000641691
					423	49.1191	-0.00485636	49.1191	-0.00247946	49.1191	-0.00241347	49.1191	-0.000632068	49.1191	-0.00110006	49.1191	-0.000103469	49.1191	-0.00123826	49.1191	-0.000533823	49.1191	-0.000712995	49.1191	-0.000141153	49.1191	-0.000455761	49.1191	6.320647460578144e-05	49.1191	-0.00112333	49.1191	-0.000521581	49.1191	-0.000536431	49.1191	-2.52e-05	49.1191	-0.000924982	49.1191	-0.000221818	49.1191	-0.00687534	49.1191	-0.00380277	49.1191	-0.00207713	49.1191	-0.000680256
					424	49.1262	-0.00466291	49.1262	-0.00252452	49.1262	-0.00230259	49.1262	-0.000589894	49.1262	-0.00102866	49.1262	-6.68e-05	49.1262	-0.00113262	49.1262	-0.000557817	49.1262	-0.000619516	49.1262	-0.000151684	49.1262	-0.000603253	49.1262	4.1255594965372566e-05	49.1262	-0.000922452	49.1262	-0.000512898	49.1262	-0.000455006	49.1262	-3.25e-05	49.1262	-0.000889634	49.1262	-0.000175011	49.1262	-0.00681679	49.1262	-0.00393211	49.1262	-0.00196493	49.1262	-0.000670366
					425	49.1338	-0.0045208	49.1338	-0.00261548	49.1338	-0.00218589	49.1338	-0.000647033	49.1338	-0.000907676	49.1338	-0.000173692	49.1338	-0.00109507	49.1338	-0.000546663	49.1338	-0.000550848	49.1338	-0.000159333	49.1338	-0.000331432	49.1338	7.833170266907663e-05	49.1338	-0.000837511	49.1338	-0.000420485	49.1338	-0.000380942	49.1338	-6.16e-05	49.1338	-0.000853198	49.1338	-0.000215965	49.1338	-0.00656159	49.1338	-0.00380878	49.1338	-0.0018049	49.1338	-0.000677191
					426	49.1419	-0.00440407	49.1419	-0.00259045	49.1419	-0.0019886	49.1419	-0.000648956	49.1419	-0.000806432	49.1419	-0.00016211	49.1419	-0.00107523	49.1419	-0.000609677	49.1419	-0.000488894	49.1419	-0.000188679	49.1419	-0.000294273	49.1419	4.6558640102722926e-05	49.1419	-0.000875675	49.1419	-0.000597449	49.1419	-0.000275179	49.1419	2.0351586969700325e-05	49.1419	-0.000708661	49.1419	-0.000226832	49.1419	-0.00656509	49.1419	-0.003952	49.1419	-0.0016571	49.1419	-0.000606806
					427	49.1504	-0.00421535	49.1504	-0.00254151	49.1504	-0.0019705	49.1504	-0.000736764	49.1504	-0.000747908	49.1504	-0.000200056	49.1504	-0.000928633	49.1504	-0.000570414	49.1504	-0.000452818	49.1504	-0.000184949	49.1504	-0.000291631	49.1504	8.631723993612894e-05	49.1504	-0.000789772	49.1504	-0.000520739	49.1504	-0.000165994	49.1504	2.63859363133917e-05	49.1504	-0.000690356	49.1504	-0.00024164	49.1504	-0.00646287	49.1504	-0.00393864	49.1504	-0.0016217	49.1504	-0.00067413
					428	49.1595	-0.00408098	49.1595	-0.00262409	49.1595	-0.00178049	49.1595	-0.000618283	49.1595	-0.000668171	49.1595	-0.00014551	49.1595	-0.000939077	49.1595	-0.00061656	49.1595	-0.000534548	49.1595	-0.00022791	49.1595	-0.000229335	49.1595	1.8547854976680433e-05	49.1595	-0.00078249	49.1595	-0.000512168	49.1595	-0.000234181	49.1595	-8e-05	49.1595	-0.000608539	49.1595	-0.000217912	49.1595	-0.0062573	49.1595	-0.00390952	49.1595	-0.00148855	49.1595	-0.000654018
					429	49.1692	-0.00389744	49.1692	-0.002569	49.1692	-0.0016927	49.1692	-0.00062192	49.1692	-0.000613385	49.1692	-0.000213688	49.1692	-0.000888303	49.1692	-0.000672224	49.1692	-0.000416361	49.1692	-0.000235762	49.1692	-0.000174657	49.1692	7.550092419300602e-05	49.1692	-0.000678437	49.1692	-0.000539225	49.1692	-0.000116589	49.1692	-4.3e-06	49.1692	-0.000577452	49.1692	-0.000187056	49.1692	-0.00619578	49.1692	-0.00388651	49.1692	-0.00137931	49.1692	-0.000700003
					430	49.1795	-0.00377828	49.1795	-0.00252792	49.1795	-0.00160344	49.1795	-0.000682827	49.1795	-0.000562114	49.1795	-0.000156153	49.1795	-0.000799922	49.1795	-0.000629941	49.1795	-0.00028879	49.1795	-0.000154831	49.1795	-0.00020897	49.1795	3.0235504208109276e-05	49.1795	-0.000763493	49.1795	-0.000573023	49.1795	-9.39e-05	49.1795	-1.24e-05	49.1795	-0.000504872	49.1795	-0.000231616	49.1795	-0.00594695	49.1795	-0.00382938	49.1795	-0.00132271	49.1795	-0.000653282
					431	49.1905	-0.00366194	49.1905	-0.0025766	49.1905	-0.00147075	49.1905	-0.000657719	49.1905	-0.000430193	49.1905	-0.000191141	49.1905	-0.00069935	49.1905	-0.00062673	49.1905	-0.000258303	49.1905	-0.000190751	49.1905	-9.53e-05	49.1905	6.323973166083574e-05	49.1905	-0.000491898	49.1905	-0.000462608	49.1905	-0.000121585	49.1905	-8.07e-05	49.1905	-0.00063653	49.1905	-0.000275486	49.1905	-0.00596278	49.1905	-0.00392818	49.1905	-0.0013594	49.1905	-0.000769244
					432	49.2021	-0.00355609	49.2021	-0.00258028	49.2021	-0.00145277	49.2021	-0.000694363	49.2021	-0.000360347	49.2021	-0.000160638	49.2021	-0.000629089	49.2021	-0.000644925	49.2021	-0.000238425	49.2021	-0.000158588	49.2021	-0.000158881	49.2021	-1.78e-05	49.2021	-0.00057167	49.2021	-0.000579214	49.2021	1.2879644906100022e-05	49.2021	8.467047083456775e-06	49.2021	-0.000514431	49.2021	-0.000228156	49.2021	-0.00589852	49.2021	-0.00398196	49.2021	-0.00122412	49.2021	-0.000671812
					433	49.2145	-0.0034391	49.2145	-0.00256713	49.2145	-0.00132399	49.2145	-0.000725739	49.2145	-0.000385228	49.2145	-0.000220007	49.2145	-0.00068812	49.2145	-0.00064709	49.2145	-0.000135263	49.2145	-0.000194117	49.2145	-1.98e-05	49.2145	6.533238458772406e-05	49.2145	-0.000521429	49.2145	-0.000514805	49.2145	6.8693426777063655e-06	49.2145	-4.09e-05	49.2145	-0.000447579	49.2145	-0.000188867	49.2145	-0.00577664	49.2145	-0.00392555	49.2145	-0.00115016	49.2145	-0.000761042
					434	49.2277	-0.00337972	49.2277	-0.00261636	49.2277	-0.00128537	49.2277	-0.000711909	49.2277	-0.000354417	49.2277	-0.000142411	49.2277	-0.00059215	49.2277	-0.000626702	49.2277	-0.000234333	49.2277	-0.000254902	49.2277	-2.47e-06	49.2277	4.5102861710333286e-05	49.2277	-0.000596334	49.2277	-0.000527901	49.2277	7.546204894467133e-05	49.2277	1.276056492794525e-05	49.2277	-0.000462282	49.2277	-0.000226141	49.2277	-0.00552929	49.2277	-0.00387894	49.2277	-0.00115451	49.2277	-0.000739707
					435	49.2417	-0.00338552	49.2417	-0.00266825	49.2417	-0.00130929	49.2417	-0.000776458	49.2417	-0.00020305	49.2417	-0.000151944	49.2417	-0.000612857	49.2417	-0.000666611	49.2417	-0.000151702	49.2417	-0.00017765	49.2417	9.87143730772494e-05	49.2417	5.387960034325401e-05	49.2417	-0.000547879	49.2417	-0.000540083	49.2417	-2.94e-06	49.2417	-6.57e-05	49.2417	-0.000458021	49.2417	-0.000236529	49.2417	-0.00553639	49.2417	-0.00393187	49.2417	-0.00103028	49.2417	-0.000751433
					436	49.2565	-0.00321456	49.2565	-0.00263246	49.2565	-0.0011723	49.2565	-0.000718202	49.2565	-0.000187492	49.2565	-0.000157466	49.2565	-0.000628183	49.2565	-0.000675956	49.2565	-8.11e-05	49.2565	-0.000201992	49.2565	6.101003725297177e-05	49.2565	8.956934086701285e-06	49.2565	-0.000524458	49.2565	-0.000536351	49.2565	7.410319655018374e-05	49.2565	-2.93e-05	49.2565	-0.000394196	49.2565	-0.000240479	49.2565	-0.00553241	49.2565	-0.00399235	49.2565	-0.00103337	49.2565	-0.000754733
					437	49.2723	-0.00321165	49.2723	-0.00261292	49.2723	-0.00114943	49.2723	-0.000757467	49.2723	-0.000325782	49.2723	-0.000222641	49.2723	-0.000495393	49.2723	-0.000609693	49.2723	-5.66e-05	49.2723	-0.000178991	49.2723	5.445638829108118e-05	49.2723	1.2728867130606947e-05	49.2723	-0.000438246	49.2723	-0.000524118	49.2723	0.000133492	49.2723	-1.37e-05	49.2723	-0.000420906	49.2723	-0.000248129	49.2723	-0.00550681	49.2723	-0.00400217	49.2723	-0.000929588	49.2723	-0.00069376
					438	49.2891	-0.00310193	49.2891	-0.00260497	49.2891	-0.00107552	49.2891	-0.000675803	49.2891	-0.000121812	49.2891	-0.000149781	49.2891	-0.000428244	49.2891	-0.000590622	49.2891	-0.000119863	49.2891	-0.000273352	49.2891	0.000115518	49.2891	3.1185492289587113e-05	49.2891	-0.000418962	49.2891	-0.000483425	49.2891	7.572642491633229e-05	49.2891	-5.24e-05	49.2891	-0.000354391	49.2891	-0.000261479	49.2891	-0.00534659	49.2891	-0.00390113	49.2891	-0.000916911	49.2891	-0.000755982
					439	49.307	-0.0030463	49.307	-0.00262741	49.307	-0.00108125	49.307	-0.000738159	49.307	-0.000172326	49.307	-0.000210904	49.307	-0.000461228	49.307	-0.000611601	49.307	-1.21e-05	49.307	-0.000157842	49.307	0.000163057	49.307	4.120496844289834e-05	49.307	-0.000479643	49.307	-0.000561111	49.307	3.934498270858353e-05	49.307	-8.86e-05	49.307	-0.000367874	49.307	-0.000228934	49.307	-0.00531282	49.307	-0.00391761	49.307	-0.000830884	49.307	-0.000726717
					440	49.326	-0.00298346	49.326	-0.00266202	49.326	-0.00104974	49.326	-0.000823857	49.326	-0.000289154	49.326	-0.000239672	49.326	-0.000495625	49.326	-0.000596021	49.326	-0.000154847	49.326	-0.000266602	49.326	0.000100455	49.326	5.257882230974564e-05	49.326	-0.000535304	49.326	-0.000575966	49.326	0.000125395	49.326	-7.79e-05	49.326	-0.00035833	49.326	-0.000259564	49.326	-0.00529046	49.326	-0.00396578	49.326	-0.000821915	49.326	-0.000721728
					441	49.3462	-0.00295432	49.3462	-0.00263586	49.3462	-0.000957587	49.3462	-0.000698621	49.3462	-0.000172902	49.3462	-0.000229364	49.3462	-0.00045095	49.3462	-0.000609636	49.3462	-7.58e-06	49.3462	-0.000254463	49.3462	7.889169248245786e-05	49.3462	2.8497887805623012e-05	49.3462	-0.00029524	49.3462	-0.000480994	49.3462	4.474803942096351e-05	49.3462	-8.77e-05	49.3462	-0.000284742	49.3462	-0.000245108	49.3462	-0.00532445	49.3462	-0.00403809	49.3462	-0.00087695	49.3462	-0.000793236
					442	49.3676	-0.00292101	49.3676	-0.00267339	49.3676	-0.000962767	49.3676	-0.000732616	49.3676	-0.000129165	49.3676	-0.000246777	49.3676	-0.000585609	49.3676	-0.000721288	49.3676	-4.73e-05	49.3676	-0.000211073	49.3676	9.908588445792926e-05	49.3676	3.654442775163913e-05	49.3676	-0.000519947	49.3676	-0.000601575	49.3676	7.17014552095688e-05	49.3676	-6.71e-05	49.3676	-0.00029441	49.3676	-0.000238824	49.3676	-0.0052016	49.3676	-0.00397063	49.3676	-0.000901324	49.3676	-0.000824782
					443	49.3904	-0.0030204	49.3904	-0.00277441	49.3904	-0.000809458	49.3904	-0.000689798	49.3904	-6.47e-05	49.3904	-0.000217785	49.3904	-0.000396486	49.3904	-0.000600226	49.3904	5.047019254847754e-05	49.3904	-0.000204929	49.3904	7.065213123821218e-05	49.3904	2.9842838519589243e-05	49.3904	-0.000326373	49.3904	-0.000467448	49.3904	0.000231228	49.3904	2.151833452298385e-05	49.3904	-0.000336749	49.3904	-0.000224254	49.3904	-0.00532544	49.3904	-0.00405097	49.3904	-0.00083982	49.3904	-0.000715823
					444	49.4147	-0.00281168	49.4147	-0.00260515	49.4147	-0.000943135	49.4147	-0.000680294	49.4147	-4.87e-05	49.4147	-0.000201528	49.4147	-0.000462834	49.4147	-0.000637485	49.4147	-0.000113203	49.4147	-0.00026743	49.4147	0.000170398	49.4147	2.8822907945147413e-05	49.4147	-0.000482514	49.4147	-0.000565605	49.4147	0.000136512	49.4147	-3.06e-05	49.4147	-0.000346541	49.4147	-0.000271399	49.4147	-0.0052683	49.4147	-0.00405639	49.4147	-0.000774233	49.4147	-0.000748577
					445	49.4405	-0.00288956	49.4405	-0.00266631	49.4405	-0.000952686	49.4405	-0.000757396	49.4405	-1.37e-05	49.4405	-0.000151187	49.4405	-0.000423513	49.4405	-0.000605541	49.4405	1.7254717365735358e-05	49.4405	-0.000181544	49.4405	6.737045100437683e-05	49.4405	1.3458448545444757e-05	49.4405	-0.000391818	49.4405	-0.000555515	49.4405	0.000114773	49.4405	-6.6e-05	49.4405	-0.000427541	49.4405	-0.000282569	49.4405	-0.00518581	49.4405	-0.00401811	49.4405	-0.000810467	49.4405	-0.000781979
					446	49.4679	-0.00289061	49.4679	-0.00272247	49.4679	-0.000910023	49.4679	-0.000757086	49.4679	-0.000103824	49.4679	-0.000204891	49.4679	-0.000498179	49.4679	-0.000623718	49.4679	1.196535271759825e-07	49.4679	-0.000170038	49.4679	0.00011126	49.4679	6.0847583089052026e-05	49.4679	-0.000360424	49.4679	-0.000537419	49.4679	0.000143326	49.4679	-5.94e-05	49.4679	-0.000415109	49.4679	-0.000293803	49.4679	-0.00510049	49.4679	-0.0039857	49.4679	-0.00076895	49.4679	-0.00074813
					447	49.497	-0.00284357	49.497	-0.00265361	49.497	-0.000879065	49.497	-0.000704076	49.497	-0.000136531	49.497	-0.000227493	49.497	-0.000521384	49.497	-0.000685665	49.497	-1.65e-05	49.497	-0.000215005	49.497	0.000137371	49.497	3.347316814616974e-05	49.497	-0.000334394	49.497	-0.000537971	49.497	0.000187027	49.497	-5.98e-05	49.497	-0.000324182	49.497	-0.000274312	49.497	-0.00510646	49.497	-0.00397531	49.497	-0.00078924	49.497	-0.000716352
					448	49.5279	-0.00282972	49.5279	-0.00272395	49.5279	-0.000845328	49.5279	-0.000779817	49.5279	-7.79e-05	49.5279	-0.000234912	49.5279	-0.000477353	49.5279	-0.000646436	49.5279	3.4534212988938245e-06	49.5279	-0.000219981	49.5279	0.000126229	49.5279	2.9224676087347135e-05	49.5279	-0.000398894	49.5279	-0.000504005	49.5279	0.000134226	49.5279	-6.8e-05	49.5279	-0.000400108	49.5279	-0.000325263	49.5279	-0.0050807	49.5279	-0.00391802	49.5279	-0.000819655	49.5279	-0.000777177
					449	49.5608	-0.00278453	49.5608	-0.00268657	49.5608	-0.00081502	49.5608	-0.000656537	49.5608	9.89839924176155e-06	49.5608	-0.000153658	49.5608	-0.000413751	49.5608	-0.000581823	49.5608	-2.2e-05	49.5608	-0.000236166	49.5608	2.359968199742296e-05	49.5608	-6.93e-06	49.5608	-0.000271573	49.5608	-0.000454818	49.5608	0.000180337	49.5608	-3.38e-05	49.5608	-0.000345534	49.5608	-0.000267156	49.5608	-0.00504942	49.5608	-0.00397407	49.5608	-0.000805598	49.5608	-0.000800695
					450	49.5958	-0.0029002	49.5958	-0.00270411	49.5958	-0.000818653	49.5958	-0.000712449	49.5958	-6.58e-05	49.5958	-0.000171677	49.5958	-0.000341504	49.5958	-0.000562833	49.5958	-2.97e-05	49.5958	-0.000170329	49.5958	0.000154863	49.5958	6.197890741288514e-05	49.5958	-0.000261567	49.5958	-0.000483869	49.5958	0.000247773	49.5958	7.114666364286398e-05	49.5958	-0.000401612	49.5958	-0.000271959	49.5958	-0.00512947	49.5958	-0.0040018	49.5958	-0.000789317	49.5958	-0.000758914
					451	49.633	-0.00284489	49.633	-0.00269285	49.633	-0.000877844	49.633	-0.000719211	49.633	-8.22e-05	49.633	-0.000201553	49.633	-0.000378931	49.633	-0.000574604	49.633	-6.57e-05	49.633	-0.000226503	49.633	9.91405209219004e-05	49.633	5.061701713449107e-05	49.633	-0.000285419	49.633	-0.000505124	49.633	0.000216974	49.633	2.764483610243236e-05	49.633	-0.000279813	49.633	-0.000269382	49.633	-0.0051297	49.633	-0.00393245	49.633	-0.000779379	49.633	-0.000762609
					452	49.6726	-0.00289588	49.6726	-0.00270519	49.6726	-0.000879014	49.6726	-0.00071174	49.6726	-7.04e-05	49.6726	-0.000184873	49.6726	-0.000517537	49.6726	-0.000638034	49.6726	-0.000104604	49.6726	-0.000294099	49.6726	0.000134496	49.6726	4.292325397237118e-05	49.6726	-0.000373787	49.6726	-0.000589803	49.6726	4.2045104394829906e-05	49.6726	-4.26e-05	49.6726	-0.000357034	49.6726	-0.00023289	49.6726	-0.0052412	49.6726	-0.00404478	49.6726	-0.000744063	49.6726	-0.000745712
					453	49.7146	-0.00275908	49.7146	-0.00267291	49.7146	-0.000860183	49.7146	-0.000712034	49.7146	-9.76e-05	49.7146	-0.000184699	49.7146	-0.000405757	49.7146	-0.000595068	49.7146	-4.98e-05	49.7146	-0.000171585	49.7146	0.000168446	49.7146	5.6470406602116e-05	49.7146	-0.000327723	49.7146	-0.000508011	49.7146	0.000251097	49.7146	-1.63e-05	49.7146	-0.000290887	49.7146	-0.000246532	49.7146	-0.00511944	49.7146	-0.00397824	49.7146	-0.000709089	49.7146	-0.000736093
					454	49.7593	-0.00282671	49.7593	-0.00269636	49.7593	-0.000947483	49.7593	-0.000752808	49.7593	-7.56e-05	49.7593	-0.000178159	49.7593	-0.000441567	49.7593	-0.000561483	49.7593	-5.47e-06	49.7593	-0.000234938	49.7593	0.000134454	49.7593	1.1813696079443492e-05	49.7593	-0.000389297	49.7593	-0.00054091	49.7593	0.000118669	49.7593	2.046400691447202e-05	49.7593	-0.0003951	49.7593	-0.000309485	49.7593	-0.00514464	49.7593	-0.00403124	49.7593	-0.000754338	49.7593	-0.000745827
					455	49.8067	-0.00281624	49.8067	-0.00269642	49.8067	-0.000839751	49.8067	-0.000684782	49.8067	-0.00010894	49.8067	-0.000256961	49.8067	-0.000490554	49.8067	-0.000575855	49.8067	-2.75e-05	49.8067	-0.000240989	49.8067	3.436616350816629e-05	49.8067	4.922807323282097e-06	49.8067	-0.000456671	49.8067	-0.000579148	49.8067	0.000240563	49.8067	3.0175111530795357e-05	49.8067	-0.000297837	49.8067	-0.000210196	49.8067	-0.0051415	49.8067	-0.00398504	49.8067	-0.000856724	49.8067	-0.000774914
					456	49.8572	-0.00284821	49.8572	-0.00269264	49.8572	-0.000978633	49.8572	-0.000755247	49.8572	-8.66e-05	49.8572	-0.000215929	49.8572	-0.000430071	49.8572	-0.000614519	49.8572	-3.32e-05	49.8572	-0.000202767	49.8572	0.000170615	49.8572	1.6596934825696685e-05	49.8572	-0.000344191	49.8572	-0.00057076	49.8572	0.000140059	49.8572	-2.17e-05	49.8572	-0.000394495	49.8572	-0.000258583	49.8572	-0.00510989	49.8572	-0.00401315	49.8572	-0.000730479	49.8572	-0.000730783
					457	49.9109	-0.00291802	49.9109	-0.00273588	49.9109	-0.000884847	49.9109	-0.000691713	49.9109	-7.59e-05	49.9109	-0.000200439	49.9109	-0.000543954	49.9109	-0.000677603	49.9109	-7.1e-05	49.9109	-0.000209687	49.9109	0.000265267	49.9109	5.214979042056367e-05	49.9109	-0.000324769	49.9109	-0.000502349	49.9109	0.00013076	49.9109	-3.39e-05	49.9109	-0.000317195	49.9109	-0.000213088	49.9109	-0.00515257	49.9109	-0.00406238	49.9109	-0.000837714	49.9109	-0.000756408
					458	49.9679	-0.00285882	49.9679	-0.0027475	49.9679	-0.000969939	49.9679	-0.000772534	49.9679	-7.34e-05	49.9679	-0.000175121	49.9679	-0.000424866	49.9679	-0.000541217	49.9679	-5.66e-05	49.9679	-0.00022431	49.9679	0.000148399	49.9679	4.644997275499163e-05	49.9679	-0.000349098	49.9679	-0.000467106	49.9679	0.0001449	49.9679	3.055323817039053e-05	49.9679	-0.000281665	49.9679	-0.000168923	49.9679	-0.00516996	49.9679	-0.00407141	49.9679	-0.000651806	49.9679	-0.000725656
					459	50.0286	-0.00288914	50.0286	-0.00273544	50.0286	-0.00087793	50.0286	-0.000704939	50.0286	-0.000117846	50.0286	-0.000263708	50.0286	-0.000429577	50.0286	-0.000556391	50.0286	7.122475657046854e-05	50.0286	-0.000193223	50.0286	7.055343758545496e-05	50.0286	2.9570203358419977e-05	50.0286	-0.000294128	50.0286	-0.00051983	50.0286	0.000171945	50.0286	7.408552599201187e-05	50.0286	-0.00030938	50.0286	-0.000200416	50.0286	-0.0052242	50.0286	-0.00406495	50.0286	-0.000720769	50.0286	-0.000701915
					460	50.093	-0.00285119	50.093	-0.00267573	50.093	-0.000862186	50.093	-0.000677134	50.093	-0.000206388	50.093	-0.000265658	50.093	-0.00043394	50.093	-0.000600201	50.093	-5.26e-05	50.093	-0.000175293	50.093	0.000146997	50.093	1.8657888593065497e-05	50.093	-0.000444653	50.093	-0.000577678	50.093	0.00022363	50.093	-3.25e-05	50.093	-0.000348537	50.093	-0.000205705	50.093	-0.00515386	50.093	-0.0040592	50.093	-0.000877642	50.093	-0.000777461
					461	50.1616	-0.00286131	50.1616	-0.00280424	50.1616	-0.000857255	50.1616	-0.000728694	50.1616	-0.000179757	50.1616	-0.000230723	50.1616	-0.000383887	50.1616	-0.000558806	50.1616	-5.82e-05	50.1616	-0.00023157	50.1616	0.00013359	50.1616	6.21124167065612e-05	50.1616	-0.000376386	50.1616	-0.000499742	50.1616	0.00014236	50.1616	-6.91e-06	50.1616	-0.00038336	50.1616	-0.000294463	50.1616	-0.00513362	50.1616	-0.00402107	50.1616	-0.000717415	50.1616	-0.000667449
					462	50.2344	-0.002923	50.2344	-0.00269567	50.2344	-0.000888178	50.2344	-0.000683768	50.2344	7.373942961401859e-06	50.2344	-0.00020894	50.2344	-0.000402359	50.2344	-0.000573602	50.2344	-1.25e-05	50.2344	-0.000188017	50.2344	0.000144363	50.2344	2.6716136482640707e-05	50.2344	-0.000474914	50.2344	-0.000550033	50.2344	9.038233490222289e-05	50.2344	-8.27e-05	50.2344	-0.000442566	50.2344	-0.00027657	50.2344	-0.00511302	50.2344	-0.00397483	50.2344	-0.000836375	50.2344	-0.000747857
					463	50.3119	-0.00276319	50.3119	-0.0027054	50.3119	-0.00089102	50.3119	-0.000752027	50.3119	-0.000178049	50.3119	-0.000202763	50.3119	-0.00048857	50.3119	-0.000679983	50.3119	-5.75e-05	50.3119	-0.000152341	50.3119	0.000152277	50.3119	6.154956710374693e-05	50.3119	-0.000396635	50.3119	-0.000490176	50.3119	0.000252351	50.3119	2.6486420093729812e-05	50.3119	-0.000375813	50.3119	-0.000254331	50.3119	-0.00517985	50.3119	-0.00402118	50.3119	-0.000814119	50.3119	-0.000744335
					464	50.3942	-0.00280692	50.3942	-0.00273259	50.3942	-0.000898278	50.3942	-0.000733512	50.3942	-8.21e-05	50.3942	-0.000217698	50.3942	-0.00044802	50.3942	-0.000589217	50.3942	-6.01e-05	50.3942	-0.000214915	50.3942	0.000103421	50.3942	4.9733304862020766e-05	50.3942	-0.000397412	50.3942	-0.000555424	50.3942	0.000297936	50.3942	5.4593793417226366e-05	50.3942	-0.000350539	50.3942	-0.000253896	50.3942	-0.00522417	50.3942	-0.00405621	50.3942	-0.000767218	50.3942	-0.000760929
					465	50.4817	-0.00298514	50.4817	-0.00275451	50.4817	-0.000931506	50.4817	-0.000728978	50.4817	-0.000138339	50.4817	-0.000268355	50.4817	-0.000470466	50.4817	-0.000643916	50.4817	9.80729442504242e-06	50.4817	-0.000214089	50.4817	0.000103648	50.4817	5.0614211089428096e-05	50.4817	-0.000271941	50.4817	-0.000489162	50.4817	0.000193555	50.4817	-1.56e-05	50.4817	-0.000333928	50.4817	-0.000215511	50.4817	-0.00523282	50.4817	-0.00405998	50.4817	-0.000788408	50.4817	-0.000791227
					466	50.5747	-0.00284951	50.5747	-0.00270767	50.5747	-0.000937285	50.5747	-0.000767337	50.5747	-7.56e-05	50.5747	-0.000168338	50.5747	-0.000374668	50.5747	-0.000549232	50.5747	-4.75e-05	50.5747	-0.00025276	50.5747	5.6296220354877524e-05	50.5747	2.1384529908075045e-05	50.5747	-0.000341414	50.5747	-0.000526998	50.5747	0.000168452	50.5747	5.000914603378766e-05	50.5747	-0.000336641	50.5747	-0.000241359	50.5747	-0.00516511	50.5747	-0.00401245	50.5747	-0.000842128	50.5747	-0.000775114
					467	50.6736	-0.00283506	50.6736	-0.00269794	50.6736	-0.000806823	50.6736	-0.000713779	50.6736	-9.09e-05	50.6736	-0.000189314	50.6736	-0.000424306	50.6736	-0.000592727	50.6736	6.506076346902631e-06	50.6736	-0.000193987	50.6736	0.000111411	50.6736	4.3595802538598516e-05	50.6736	-0.000305991	50.6736	-0.000428118	50.6736	8.96066133549674e-05	50.6736	-0.000107713	50.6736	-0.000348273	50.6736	-0.000235612	50.6736	-0.00531687	50.6736	-0.00411666	50.6736	-0.000779304	50.6736	-0.000707452
					468	50.7787	-0.00281189	50.7787	-0.002682	50.7787	-0.000839235	50.7787	-0.00068909	50.7787	-2.16e-05	50.7787	-0.000230761	50.7787	-0.000415978	50.7787	-0.000579589	50.7787	-8.57e-05	50.7787	-0.000244731	50.7787	0.000249057	50.7787	8.78571572350273e-05	50.7787	-0.000348653	50.7787	-0.000511582	50.7787	0.000275667	50.7787	3.076005343845625e-05	50.7787	-0.000282363	50.7787	-0.000230715	50.7787	-0.00521222	50.7787	-0.00402826	50.7787	-0.000778421	50.7787	-0.000713337
					469	50.8904	-0.0028537	50.8904	-0.00269772	50.8904	-0.000813153	50.8904	-0.000714382	50.8904	-0.000168895	50.8904	-0.000265445	50.8904	-0.000418133	50.8904	-0.000642478	50.8904	5.782331568246588e-05	50.8904	-0.000181428	50.8904	0.000195154	50.8904	6.940089014334516e-05	50.8904	-0.000343864	50.8904	-0.00054626	50.8904	0.000203127	50.8904	3.2962655703209706e-05	50.8904	-0.000321085	50.8904	-0.00021825	50.8904	-0.00523112	50.8904	-0.00406083	50.8904	-0.000813777	50.8904	-0.000711338
					470	51.0092	-0.0028684	51.0092	-0.00269561	51.0092	-0.000853343	51.0092	-0.000699999	51.0092	-1.4e-05	51.0092	-0.000137134	51.0092	-0.000418802	51.0092	-0.000577451	51.0092	-5.93e-05	51.0092	-0.00023857	51.0092	0.00014241	51.0092	5.037420876058407e-05	51.0092	-0.000390941	51.0092	-0.000541487	51.0092	0.000279667	51.0092	9.160352506082207e-05	51.0092	-0.000337952	51.0092	-0.000299338	51.0092	-0.00520063	51.0092	-0.00405488	51.0092	-0.000711473	51.0092	-0.000693558
					471	51.1355	-0.00279951	51.1355	-0.00270623	51.1355	-0.000965913	51.1355	-0.000743416	51.1355	-5.32e-05	51.1355	-0.000188599	51.1355	-0.000357514	51.1355	-0.000607032	51.1355	1.599051331885445e-05	51.1355	-0.000211197	51.1355	0.000102894	51.1355	3.919975892996419e-05	51.1355	-0.000335821	51.1355	-0.00038772	51.1355	0.000183462	51.1355	6.472703175188291e-05	51.1355	-0.000338782	51.1355	-0.000167906	51.1355	-0.00520673	51.1355	-0.00402076	51.1355	-0.000675735	51.1355	-0.000645579
					472	51.2697	-0.00296073	51.2697	-0.00282363	51.2697	-0.000926347	51.2697	-0.00074407	51.2697	-2.33e-05	51.2697	-0.000146249	51.2697	-0.000433439	51.2697	-0.000560103	51.2697	-0.000142337	51.2697	-0.000288427	51.2697	6.117107956118278e-05	51.2697	3.140559432446288e-05	51.2697	-0.000351674	51.2697	-0.000457191	51.2697	0.000270649	51.2697	8.128139380441865e-05	51.2697	-0.000415326	51.2697	-0.000260599	51.2697	-0.00519433	51.2697	-0.00404343	51.2697	-0.000763927	51.2697	-0.000732106
					473	51.4124	-0.0028533	51.4124	-0.00268834	51.4124	-0.00091407	51.4124	-0.000788572	51.4124	-1.28e-05	51.4124	-0.000140843	51.4124	-0.000485523	51.4124	-0.00062572	51.4124	-1.92e-05	51.4124	-0.000138035	51.4124	0.00023327	51.4124	9.4795521501434e-05	51.4124	-0.000267896	51.4124	-0.000463584	51.4124	0.000228672	51.4124	7.167653904718331e-05	51.4124	-0.000316761	51.4124	-0.000195236	51.4124	-0.00534856	51.4124	-0.00410089	51.4124	-0.00077592	51.4124	-0.000722215
					474	51.5641	-0.00285331	51.5641	-0.00277117	51.5641	-0.000879774	51.5641	-0.000719394	51.5641	-4.36e-06	51.5641	-0.000178354	51.5641	-0.000378673	51.5641	-0.000539204	51.5641	-2.87e-05	51.5641	-0.000176514	51.5641	0.000178028	51.5641	0.000102664	51.5641	-0.000372278	51.5641	-0.000474381	51.5641	0.000162944	51.5641	3.9065586835954416e-05	51.5641	-0.000398351	51.5641	-0.000235933	51.5641	-0.00518542	51.5641	-0.0040267	51.5641	-0.000768064	51.5641	-0.000704109
					475	51.7253	-0.002869	51.7253	-0.00269645	51.7253	-0.000835669	51.7253	-0.00071	51.7253	-2.69e-05	51.7253	-0.000118931	51.7253	-0.000430681	51.7253	-0.000589461	51.7253	-3.21e-05	51.7253	-0.000151056	51.7253	0.00022231	51.7253	0.000112421	51.7253	-0.000350839	51.7253	-0.000424293	51.7253	0.000107001	51.7253	-1.89e-05	51.7253	-0.000384288	51.7253	-0.000248985	51.7253	-0.00532055	51.7253	-0.00403551	51.7253	-0.00082054	51.7253	-0.000719308
					476	51.8967	-0.0030264	51.8967	-0.00286692	51.8967	-0.000844163	51.8967	-0.000729126	51.8967	1.472696264245366e-05	51.8967	-0.000172351	51.8967	-0.000391239	51.8967	-0.000567051	51.8967	-0.000109227	51.8967	-0.00022846	51.8967	0.000192718	51.8967	7.109186410308999e-05	51.8967	-0.000378267	51.8967	-0.000508238	51.8967	0.000149081	51.8967	2.3844360720528396e-06	51.8967	-0.000292846	51.8967	-0.000178607	51.8967	-0.00531684	51.8967	-0.004092	51.8967	-0.00079367	51.8967	-0.000667935
					477	52.0789	-0.00288873	52.0789	-0.00279409	52.0789	-0.000798214	52.0789	-0.000673733	52.0789	-0.000165334	52.0789	-0.000174807	52.0789	-0.000429955	52.0789	-0.000556972	52.0789	7.677476460413168e-05	52.0789	-0.000125115	52.0789	0.000206553	52.0789	6.501067641323521e-05	52.0789	-0.000372875	52.0789	-0.000436117	52.0789	0.000268813	52.0789	6.816203508019057e-05	52.0789	-0.000285201	52.0789	-0.000172619	52.0789	-0.00523695	52.0789	-0.00411823	52.0789	-0.000838895	52.0789	-0.000760133
					478	52.2726	-0.00293591	52.2726	-0.00280606	52.2726	-0.00093065	52.2726	-0.0007663	52.2726	-1.92e-06	52.2726	-7.38e-05	52.2726	-0.000350094	52.2726	-0.000542921	52.2726	-8.77e-05	52.2726	-0.000211015	52.2726	0.000163245	52.2726	8.670525174026e-05	52.2726	-0.000330815	52.2726	-0.000483457	52.2726	0.000159676	52.2726	5.475389219108777e-05	52.2726	-0.000283696	52.2726	-0.000140427	52.2726	-0.00530141	52.2726	-0.00410402	52.2726	-0.000762707	52.2726	-0.000708159
					479	52.4785	-0.00292853	52.4785	-0.00279492	52.4785	-0.000849561	52.4785	-0.000740927	52.4785	-2.17e-05	52.4785	-0.000123894	52.4785	-0.000344652	52.4785	-0.000558261	52.4785	-5.65e-05	52.4785	-0.000186989	52.4785	0.000161211	52.4785	6.823329992627913e-05	52.4785	-0.000387557	52.4785	-0.000487894	52.4785	0.00029065	52.4785	0.000119676	52.4785	-0.000383603	52.4785	-0.000240549	52.4785	-0.00538972	52.4785	-0.0041495	52.4785	-0.000799128	52.4785	-0.000779638
					480	52.6974	-0.00303302	52.6974	-0.00284279	52.6974	-0.000843598	52.6974	-0.000668236	52.6974	-0.000120767	52.6974	-0.000152822	52.6974	-0.000321612	52.6974	-0.000531278	52.6974	-6.27e-05	52.6974	-0.000175094	52.6974	0.000219396	52.6974	7.683526064689028e-05	52.6974	-0.000250298	52.6974	-0.000468097	52.6974	0.000232395	52.6974	0.000106006	52.6974	-0.000351413	52.6974	-0.00016285	52.6974	-0.00541506	52.6974	-0.00415448	52.6974	-0.000687323	52.6974	-0.000646468
					481	52.93	-0.00307364	52.93	-0.00281514	52.93	-0.00085748	52.93	-0.000701558	52.93	7.288969455539283e-05	52.93	-0.000119061	52.93	-0.000354711	52.93	-0.000538755	52.93	-0.000100066	52.93	-0.000224301	52.93	0.000252403	52.93	0.000102039	52.93	-0.000334107	52.93	-0.000472203	52.93	0.000133102	52.93	4.3715052128093235e-05	52.93	-0.000315814	52.93	-0.000186478	52.93	-0.00532144	52.93	-0.00416679	52.93	-0.000721937	52.93	-0.000746794
					482	53.1774	-0.00290285	53.1774	-0.00275098	53.1774	-0.000866945	53.1774	-0.000751495	53.1774	2.1947324310746252e-05	53.1774	-9.08e-05	53.1774	-0.000309562	53.1774	-0.000543862	53.1774	-3.05e-05	53.1774	-0.000141652	53.1774	0.000291713	53.1774	0.000126896	53.1774	-0.000258055	53.1774	-0.000415477	53.1774	0.000198683	53.1774	0.000103716	53.1774	-0.00028797	53.1774	-0.000188468	53.1774	-0.00535092	53.1774	-0.00414204	53.1774	-0.000784056	53.1774	-0.000678998
					483	53.4403	-0.00291766	53.4403	-0.00279678	53.4403	-0.000803421	53.4403	-0.000718327	53.4403	-9.03e-05	53.4403	-0.000155533	53.4403	-0.000326212	53.4403	-0.000523707	53.4403	-2.18e-05	53.4403	-0.000173384	53.4403	0.000228713	53.4403	0.000108844	53.4403	-0.000173771	53.4403	-0.000421498	53.4403	0.00028372	53.4403	8.614013653909965e-05	53.4403	-0.000312173	53.4403	-0.000166748	53.4403	-0.0052862	53.4403	-0.0041123	53.4403	-0.000772121	53.4403	-0.000715283
					484	53.7198	-0.00305231	53.7198	-0.00285022	53.7198	-0.000847987	53.7198	-0.000701282	53.7198	1.1346379223823103e-05	53.7198	-0.000121211	53.7198	-0.000260297	53.7198	-0.000567421	53.7198	-0.000135254	53.7198	-0.000259714	53.7198	0.000313066	53.7198	0.000130491	53.7198	-0.000218204	53.7198	-0.000399781	53.7198	0.000237977	53.7198	6.930610673299906e-05	53.7198	-0.000270273	53.7198	-0.000174284	53.7198	-0.00529221	53.7198	-0.00406135	53.7198	-0.000706733	53.7198	-0.000671377
					485	54.0169	-0.00294388	54.0169	-0.00275476	54.0169	-0.000797261	54.0169	-0.000700226	54.0169	2.2678378631370115e-05	54.0169	-0.000130088	54.0169	-0.000310863	54.0169	-0.000528983	54.0169	-6.43e-05	54.0169	-0.000151726	54.0169	0.000126129	54.0169	6.678199153625775e-05	54.0169	-0.000186043	54.0169	-0.00040265	54.0169	0.000286314	54.0169	9.13587628354074e-05	54.0169	-0.000313885	54.0169	-0.000162559	54.0169	-0.00539753	54.0169	-0.00422464	54.0169	-0.00068758	54.0169	-0.00064783
					486
					487
					488
					489
					490
					491
					492
					493
					494
					495
					496
					497
					498
					499
					500
					501
					502
					503
					504
					505
					506
					507
					508
					509
					510
					511
					512
					513
					514
					515
					516
					517
					518
					519
					520
					521
					522
					523
					524
					525
					526
					527
					528
					529
					530
					531
					532
					533
					534
					535
					536
					537
					538
					539
					540
					541
					542
					543
					544
					545
					546
					547
					548
					549
					550
					551
					552
					553
					554
					555
					556
					557
					558
					559
					560
					561
					562
					563
					564
					565
					566
					567
					568
					569
					570
					571
					572
					573
					574
					575
					576
					577
					578
					579
					580
					581
					582
					583
					584
					585
					586
					587
					588
					589
					590
					591
					592
					593
					594
					595
					596
					597
					598
					599
					600
					601
					602
					603
					604
					605
					606
					607
					608
					609
					610
					611
					612
					613
					614
					615
					616
					617
					618
					619
					620
					621
					622
					623
					624
					625
					626
					627
					628
					629
					630
					631
					632
					633
					634
					635
					636
					637
					638
					639
					640
					641
					642
					643
					644
					645
					646
					647
					648
					649
					650
					651
					652
					653
					654
					655
					656
					657
					658
					659
					660
					661
					662
					663
					664
					665
					666
					667
					668
					669
					670
					671
					672
					673
					674
					675
					676
					677
					678
					679
					680
					681
					682
					683
					684
					685
					686
					687
					688
					689
					690
					691
					692
					693
					694
					695
					696
					697
					698
					699
					700
					701
					702
					703
					704
					705
					706
					707
					708
					709
					710
					711
					712
					713
					714
					715
					716
					717
					718
					719
					720
					721
					722
					723
					724
					725
					726
					727
					728
					729
					730
					731
					732
					733
					734
					735
					736
					737
					738
					739
					740
					741
					742
					743
					744
					745
					746
					747
					748
					749
					750
					751
					752
					753
					754
					755
					756
					757
					758
					759
					760
					761
					762
					763
					764
					765
					766
					767
					768
					769
					770
					771
					772
					773
					774
					775
					776
					777
					778
					779
					780
					781
					782
					783
					784
					785
					786
					787
					788
					789
					790
					791
					792
					793
					794
					795
					796
					797
					798
					799
					800
					801
					802
					803
					804
					805
					806
					807
					808
					809
					810
					811
					812
					813
					814
					815
					816
					817
					818
					819
					820
					821
					822
					823
					824
					825
					826
					827
					828
					829
					830
					831
					832
					833
					834
					835
					836
					837
					838
					839
					840
					841
					842
					843
					844
					845
					846
					847
					848
					849
					850
					851
					852
					853
					854
					855
					856
					857
					858
					859
					860
					861
					862
					863
					864
					865
					866
					867
					868
					869
					870
					871
					872
					873
					874
					875
					876
					877
					878
					879
					880
					881
					882
					883
					884
					885
					886
					887
					888
					889
					890
					891
					892
					893
					894
					895
					896
					897
					898
					899
					900
					901
					902
					903
					904
					905
					906
					907
					908
					909
					910
					911
					912
					913
					914
					915
					916
					917
					918
					919
					920
					921
					922
					923
					924
					925
					926
					927
					928
					929
					930
					931
					932
					933
					934
					935
					936
					937
					938
					939
					940
					941
					942
					943
					944
					945
					946
					947
					948
					949
					950
					951
					952
					953
					954
					955
					956
					957
					958
					959
					960
					961
					962
					963
					964
					965
					966
					967
					968
					969
					970
					971
					972
					973
					974
					975
					976
					977
					978
					979
					980
					981
					982
					983
					984
					985
					986
					987
					988
					989
					990
					991
					992
					993
					994
					995
					996
					997
					998
					999
					1000
					1001
					1002
					1003
					1004
					1005
					1006
					1007
					1008
					1009
					1010
					1011
					1012
					1013
					1014
					1015
					1016
					1017
					1018
					1019
					1020
					1021
					1022
					1023
					1024
					1025
					1026
					1027
					1028
					1029
					1030
					1031
					1032
					1033
					1034
					1035
					1036
					1037
					1038
					1039
					1040
					1041
					1042
					1043
					1044
					1045
					1046
					1047
					1048
					1049
					1050
					1051
					1052
					1053
					1054
					1055
					1056
					1057
					1058
					1059
					1060
					1061
					1062
					1063
					1064
					1065
					1066
					1067
					1068
					1069
					1070
					1071
					1072
					1073
					1074
					1075
					1076
					1077
					1078
					1079
					1080
					1081
					1082
					1083
					1084
					1085
					1086
					1087
					1088
					1089
					1090
					1091
					1092
					1093
					1094
					1095
					1096
					1097
					1098
					1099
					1100
					1101
					1102
					1103
					1104
					1105
					1106
					1107
					1108
					1109
					1110
					1111
					1112
					1113
					1114
					1115
					1116
					1117
					1118
					1119
					1120
					1121
					1122
					1123
					1124
					1125
					1126
					1127
					1128
					1129
					1130
					1131
					1132
					1133
					1134
					1135
					1136
					1137
					1138
					1139
					1140
					1141
					1142
					1143
					1144
					1145
					1146
					1147
					1148
					1149
					1150
					1151
					1152
					1153
					1154
					1155
					1156
					1157
					1158
					1159
					1160
					1161
					1162
					1163
					1164
					1165
					1166
					1167
					1168
					1169
					1170
					1171
					1172
					1173
					1174
					1175
					1176
					1177
					1178
					1179
					1180
					1181
					1182
					1183
					1184
					1185
					1186
					1187
					1188
					1189
					1190
					1191
					1192
					1193
					1194
					1195
					1196
					1197
					1198
					1199
					1200
					1201
					1202
					1203
					1204
					1205
					1206
					1207
					1208
					1209
					1210
					1211
					1212
					1213
					1214
					1215
					1216
					1217
					1218
					1219
					1220
					1221
					1222
					1223
					1224
					1225
					1226
					1227
					1228
					1229
					1230
					1231
					1232
					1233
					1234
					1235
					1236
					1237
					1238
					1239
					1240
					1241
					1242
					1243
					1244
					1245
					1246
					1247
					1248
					1249
					1250
					1251
					1252
					1253
					1254
					1255
					1256
					1257
					1258
					1259
					1260
					1261
					1262
					1263
					1264
					1265
					1266
					1267
					1268
					1269
					1270
					1271
					1272
					1273
					1274
					1275
					1276
					1277
					1278
					1279
					1280
					1281
					1282
					1283
					1284
					1285
					1286
					1287
					1288
					1289
					1290
					1291
					1292
					1293
					1294
					1295
					1296
					1297
					1298
					1299
					1300
					1301
					1302
					1303
					1304
					1305
					1306
					1307
					1308
					1309
					1310
					1311
					1312
					1313
					1314
					1315
					1316
					1317
					1318
					1319
					1320
					1321
					1322
					1323
					1324
					1325
					1326
					1327
					1328
					1329
					1330
					1331
					1332
					1333
					1334
					1335
					1336
					1337
					1338
					1339
					1340
					1341
					1342
					1343
					1344
					1345
					1346
					1347
					1348
					1349
					1350
					1351
					1352
					1353
					1354
					1355
					1356
					1357
					1358
					1359
					1360
					1361
					1362
					1363
					1364
					1365
					1366
					1367
					1368
					1369
					1370
					1371
					1372
					1373
					1374
					1375
					1376
					1377
					1378
					1379
					1380
					1381
					1382
					1383
					1384
					1385
					1386
					1387
					1388
					1389
					1390
					1391
					1392
					1393
					1394
					1395
					1396
					1397
					1398
					1399
					1400
					1401
					1402
					1403
					1404
					1405
					1406
					1407
					1408
					1409
					1410
					1411
					1412
					1413
					1414
					1415
					1416
					1417
					1418
					1419
					1420
					1421
					1422
					1423
					1424
					1425
					1426
					1427
					1428
					1429
					1430
					1431
					1432
					1433
					1434
					1435
					1436
					1437
					1438
					1439
					1440
					1441
					1442
					1443
					1444
					1445
					1446
					1447
					1448
					1449
					1450
					1451
					1452
					1453
					1454
					1455
					1456
					1457
					1458
					1459
					1460
					1461
					1462
					1463
					1464
					1465
					1466
					1467
					1468
					1469
					1470
					1471
					1472
					1473
					1474
					1475
					1476
					1477
					1478
					1479
					1480
					1481
					1482
					1483
					1484
					1485
					1486
					1487
					1488
					1489
					1490
					1491
					1492
					1493
					1494
					1495
					1496
					1497
					1498
					1499
					1500
					1501
					1502
					1503
					1504
					1505
					1506
					1507
					1508
					1509
					1510
					1511
					1512
					1513
					1514
					1515
					1516
					1517
					1518
					1519
					1520
					1521
					1522
					1523
					1524
					1525
					1526
					1527
					1528
					1529
					1530
					1531
					1532
					1533
					1534
					1535
					1536
					1537
					1538
					1539
					1540
					1541
					1542
					1543
					1544
					1545
					1546
					1547
					1548
					1549
					1550
					1551
					1552
					1553
					1554
					1555
					1556
					1557
					1558
					1559
					1560
					1561
					1562
					1563
					1564
					1565
					1566
					1567
					1568
					1569
					1570
					1571
					1572
					1573
					1574
					1575
					1576
					1577
					1578
					1579
					1580
					1581
					1582
					1583
					1584
					1585
					1586
					1587
					1588
					1589
					1590
					1591
					1592
					1593
					1594
					1595
					1596
					1597
					1598
					1599
					1600
					1601
					1602
					1603
					1604
					1605
					1606
					1607
					1608
					1609
					1610
					1611
					1612
					1613
					1614
					1615
					1616
					1617
					1618
					1619
					1620
					1621
					1622
					1623
					1624
					1625
					1626
					1627
					1628
					1629
					1630
					1631
					1632
					1633
					1634
					1635
					1636
					1637
					1638
					1639
					1640
					1641
					1642
					1643
					1644
					1645
					1646
					1647
					1648
					1649
					1650
					1651
					1652
					1653
					1654
					1655
					1656
					1657
					1658
					1659
					1660
					1661
					1662
					1663
					1664
					1665
					1666
					1667
					1668
					1669
					1670
					1671
					1672
					1673
					1674
					1675
					1676
					1677
					1678
					1679
					1680
					1681
					1682
					1683
					1684
					1685
					1686
					1687
					1688
					1689
					1690
					1691
					1692
					1693
					1694
					1695
					1696
					1697
					1698
					1699
					1700
					1701
					1702
					1703
					1704
					1705
					1706
					1707
					1708
					1709
					1710
					1711
					1712
					1713
					1714
					1715
					1716
					1717
					1718
					1719
					1720
					1721
					1722
					1723
					1724
					1725
					1726
					1727
					1728
					1729
					1730
					1731
					1732
					1733
					1734
					1735
					1736
					1737
					1738
					1739
					1740
					1741
					1742
					1743
					1744
					1745
					1746
					1747
					1748
					1749
					1750
					1751
					1752
					1753
					1754
					1755
					1756
					1757
					1758
					1759
					1760
					1761
					1762
					1763
					1764
					1765
					1766
					1767
					1768
					1769
					1770
					1771
					1772
					1773
					1774
					1775
					1776
					1777
					1778
					1779
					1780
					1781
					1782
					1783
					1784
					1785
					1786
					1787
					1788
					1789
					1790
					1791
					1792
					1793
					1794
					1795
					1796
					1797
					1798
					1799
					1800
					1801
					1802
					1803
					1804
					1805
					1806
					1807
					1808
					1809
					1810
					1811
					1812
					1813
					1814
					1815
					1816
					1817
					1818
					1819
					1820
					1821
					1822
					1823
					1824
					1825
					1826
					1827
					1828
					1829
					1830
					1831
					1832
					1833
					1834
					1835
					1836
					1837
					1838
					1839
					1840
					1841
					1842
					1843
					1844
					1845
					1846
					1847
					1848
					1849
					1850
					1851
					1852
					1853
					1854
					1855
					1856
					1857
					1858
					1859
					1860
					1861
					1862
					1863
					1864
					1865
					1866
					1867
					1868
					1869
					1870
					1871
					1872
					1873
					1874
					1875
					1876
					1877
					1878
					1879
					1880
					1881
					1882
					1883
					1884
					1885
					1886
					1887
					1888
					1889
					1890
					1891
					1892
					1893
					1894
					1895
					1896
					1897
					1898
					1899
					1900
					1901
					1902
					1903
					1904
					1905
					1906
					1907
					1908
					1909
					1910
					1911
					1912
					1913
					1914
					1915
					1916
					1917
					1918
					1919
					1920
					1921
					1922
					1923
					1924
					1925
					1926
					1927
					1928
					1929
					1930
					1931
					1932
					1933
					1934
					1935
					1936
					1937
					1938
					1939
					1940
					1941
					1942
					1943
					1944
					1945
[truncated: 600 more columns]

## Sheet: data
Protocol:	P700_Lz			record_id	15252	15253	15252	15254	15255	15254	15256	15257	15256	15258	15259	15258	15260	15261	15260	15264	15265	15264	15266	15267	15266	15268	15269	15268	15270	15271	15270	15272	15273	15272	15274	15275	15274	15276	15277	15276	15278	15279	15278	15280	15281	15280	15282	15283	15282
Factor	10000			name	705nm Lz_Ppo: dad()0.5mM+mgcl()2.5mM+asc()10mM+kcl()3.0mM+PSI(psaBxH20_sWT_d241111)250nM+C6(GCr_E69Q)0.0uM+mv()1mM-352	740nm Lz_Ppo: dad()0.5mM+mgcl()2.5mM+asc()10mM+kcl()3.0mM+PSI(psaBxH20_sWT_d241111)250nM+C6(GCr_E69Q)0.0uM+mv()1mM-352	Lz_Ppo: dad()0.5mM+mgcl()2.5mM+asc()10mM+kcl()3.0mM+PSI(psaBxH20_sWT_d241111)250nM+C6(GCr_E69Q)0.0uM+mv()1mM-352	705nm Lz_Ppo: dad()0.5mM+mgcl()2.5mM+asc()10mM+kcl()3.0mM+PSI(psaBxH20_sWT_d241111)250nM+C6(GCr_E69Q)0.5uM+mv()1mM-352	740nm Lz_Ppo: dad()0.5mM+mgcl()2.5mM+asc()10mM+kcl()3.0mM+PSI(psaBxH20_sWT_d241111)250nM+C6(GCr_E69Q)0.5uM+mv()1mM-352	Lz_Ppo: dad()0.5mM+mgcl()2.5mM+asc()10mM+kcl()3.0mM+PSI(psaBxH20_sWT_d241111)250nM+C6(GCr_E69Q)0.5uM+mv()1mM-352	705nm Lz_Ppo: dad()0.5mM+mgcl()2.5mM+asc()10mM+kcl()3.0mM+PSI(psaBxH20_sWT_d241111)250nM+C6(GCr_E69Q)1.0uM+mv()1mM-352	740nm Lz_Ppo: dad()0.5mM+mgcl()2.5mM+asc()10mM+kcl()3.0mM+PSI(psaBxH20_sWT_d241111)250nM+C6(GCr_E69Q)1.0uM+mv()1mM-352	Lz_Ppo: dad()0.5mM+mgcl()2.5mM+asc()10mM+kcl()3.0mM+PSI(psaBxH20_sWT_d241111)250nM+C6(GCr_E69Q)1.0uM+mv()1mM-352	705nm Lz_Ppo: dad()0.5mM+mgcl()2.5mM+asc()10mM+kcl()3.0mM+PSI(psaBxH20_sWT_d241111)250nM+C6(GCr_E69Q)1.5uM+mv()1mM-352	740nm Lz_Ppo: dad()0.5mM+mgcl()2.5mM+asc()10mM+kcl()3.0mM+PSI(psaBxH20_sWT_d241111)250nM+C6(GCr_E69Q)1.5uM+mv()1mM-352	Lz_Ppo: dad()0.5mM+mgcl()2.5mM+asc()10mM+kcl()3.0mM+PSI(psaBxH20_sWT_d241111)250nM+C6(GCr_E69Q)1.5uM+mv()1mM-352	705nm Lz_Ppo: dad()0.5mM+mgcl()2.5mM+asc()10mM+kcl()3.0mM+PSI(psaBxH20_sWT_d241111)250nM+C6(GCr_E69Q)2.0uM+mv()1mM-352	740nm Lz_Ppo: dad()0.5mM+mgcl()2.5mM+asc()10mM+kcl()3.0mM+PSI(psaBxH20_sWT_d241111)250nM+C6(GCr_E69Q)2.0uM+mv()1mM-352	Lz_Ppo: dad()0.5mM+mgcl()2.5mM+asc()10mM+kcl()3.0mM+PSI(psaBxH20_sWT_d241111)250nM+C6(GCr_E69Q)2.0uM+mv()1mM-352	705nm Lz_Ppo: dad()0.5mM+mgcl()2.5mM+asc()10mM+kcl()3.0mM+PSI(psaBxH20_sWT_d241111)250nM+C6(GCr_E69Q)2.5uM+mv()1mM-352	740nm Lz_Ppo: dad()0.5mM+mgcl()2.5mM+asc()10mM+kcl()3.0mM+PSI(psaBxH20_sWT_d241111)250nM+C6(GCr_E69Q)2.5uM+mv()1mM-352	Lz_Ppo: dad()0.5mM+mgcl()2.5mM+asc()10mM+kcl()3.0mM+PSI(psaBxH20_sWT_d241111)250nM+C6(GCr_E69Q)2.5uM+mv()1mM-352	705nm Lz_Ppo: dad()0.5mM+mgcl()2.5mM+asc()10mM+kcl()3.0mM+PSI(psaBxH20_sWT_d241111)250nM+C6(GCr_E69Q)3.0uM+mv()1mM-352	740nm Lz_Ppo: dad()0.5mM+mgcl()2.5mM+asc()10mM+kcl()3.0mM+PSI(psaBxH20_sWT_d241111)250nM+C6(GCr_E69Q)3.0uM+mv()1mM-352	Lz_Ppo: dad()0.5mM+mgcl()2.5mM+asc()10mM+kcl()3.0mM+PSI(psaBxH20_sWT_d241111)250nM+C6(GCr_E69Q)3.0uM+mv()1mM-352	705nm Lz_Ppo: dad()0.5mM+mgcl()2.5mM+asc()10mM+kcl()3.0mM+PSI(psaBxH20_sWT_d241111)250nM+C6(GCr_E69Q)3.5uM+mv()1mM-352	740nm Lz_Ppo: dad()0.5mM+mgcl()2.5mM+asc()10mM+kcl()3.0mM+PSI(psaBxH20_sWT_d241111)250nM+C6(GCr_E69Q)3.5uM+mv()1mM-352	Lz_Ppo: dad()0.5mM+mgcl()2.5mM+asc()10mM+kcl()3.0mM+PSI(psaBxH20_sWT_d241111)250nM+C6(GCr_E69Q)3.5uM+mv()1mM-352	705nm Lz_Ppo: dad()0.5mM+mgcl()2.5mM+asc()10mM+kcl()3.0mM+PSI(psaBxH20_sWT_d241111)250nM+C6(GCr_E69Q)4.0uM+mv()1mM-352	740nm Lz_Ppo: dad()0.5mM+mgcl()2.5mM+asc()10mM+kcl()3.0mM+PSI(psaBxH20_sWT_d241111)250nM+C6(GCr_E69Q)4.0uM+mv()1mM-352	Lz_Ppo: dad()0.5mM+mgcl()2.5mM+asc()10mM+kcl()3.0mM+PSI(psaBxH20_sWT_d241111)250nM+C6(GCr_E69Q)4.0uM+mv()1mM-352	705nm Lz_Ppo: dad()0.5mM+mgcl()2.5mM+asc()10mM+kcl()3.0mM+PSI(psaBxH20_sWT_d241111)250nM+C6(GCr_E70Q)0.0uM+mv()1mM-353	740nm Lz_Ppo: dad()0.5mM+mgcl()2.5mM+asc()10mM+kcl()3.0mM+PSI(psaBxH20_sWT_d241111)250nM+C6(GCr_E70Q)0.0uM+mv()1mM-353	Lz_Ppo: dad()0.5mM+mgcl()2.5mM+asc()10mM+kcl()3.0mM+PSI(psaBxH20_sWT_d241111)250nM+C6(GCr_E70Q)0.0uM+mv()1mM-353	705nm Lz_Ppo: dad()0.5mM+mgcl()2.5mM+asc()10mM+kcl()3.0mM+PSI(psaBxH20_sWT_d241111)250nM+C6(GCr_E70Q)0.5uM+mv()1mM-353	740nm Lz_Ppo: dad()0.5mM+mgcl()2.5mM+asc()10mM+kcl()3.0mM+PSI(psaBxH20_sWT_d241111)250nM+C6(GCr_E70Q)0.5uM+mv()1mM-353	Lz_Ppo: dad()0.5mM+mgcl()2.5mM+asc()10mM+kcl()3.0mM+PSI(psaBxH20_sWT_d241111)250nM+C6(GCr_E70Q)0.5uM+mv()1mM-353	705nm Lz_Ppo: dad()0.5mM+mgcl()2.5mM+asc()10mM+kcl()3.0mM+PSI(psaBxH20_sWT_d241111)250nM+C6(GCr_E70Q)1.0uM+mv()1mM-353	740nm Lz_Ppo: dad()0.5mM+mgcl()2.5mM+asc()10mM+kcl()3.0mM+PSI(psaBxH20_sWT_d241111)250nM+C6(GCr_E70Q)1.0uM+mv()1mM-353	Lz_Ppo: dad()0.5mM+mgcl()2.5mM+asc()10mM+kcl()3.0mM+PSI(psaBxH20_sWT_d241111)250nM+C6(GCr_E70Q)1.0uM+mv()1mM-353	705nm Lz_Ppo: dad()0.5mM+mgcl()2.5mM+asc()10mM+kcl()3.0mM+PSI(psaBxH20_sWT_d241111)250nM+C6(GCr_E70Q)1.5uM+mv()1mM-353	740nm Lz_Ppo: dad()0.5mM+mgcl()2.5mM+asc()10mM+kcl()3.0mM+PSI(psaBxH20_sWT_d241111)250nM+C6(GCr_E70Q)1.5uM+mv()1mM-353	Lz_Ppo: dad()0.5mM+mgcl()2.5mM+asc()10mM+kcl()3.0mM+PSI(psaBxH20_sWT_d241111)250nM+C6(GCr_E70Q)1.5uM+mv()1mM-353	705nm Lz_Ppo: dad()0.5mM+mgcl()2.5mM+asc()10mM+kcl()3.0mM+PSI(psaBxH20_sWT_d241111)250nM+C6(GCr_E70Q)2.0uM+mv()1mM-353	740nm Lz_Ppo: dad()0.5mM+mgcl()2.5mM+asc()10mM+kcl()3.0mM+PSI(psaBxH20_sWT_d241111)250nM+C6(GCr_E70Q)2.0uM+mv()1mM-353	Lz_Ppo: dad()0.5mM+mgcl()2.5mM+asc()10mM+kcl()3.0mM+PSI(psaBxH20_sWT_d241111)250nM+C6(GCr_E70Q)2.0uM+mv()1mM-353	705nm Lz_Ppo: dad()0.5mM+mgcl()2.5mM+asc()10mM+kcl()3.0mM+PSI(psaBxH20_sWT_d241111)250nM+C6(GCr_E70Q)2.5uM+mv()1mM-353	740nm Lz_Ppo: dad()0.5mM+mgcl()2.5mM+asc()10mM+kcl()3.0mM+PSI(psaBxH20_sWT_d241111)250nM+C6(GCr_E70Q)2.5uM+mv()1mM-353	Lz_Ppo: dad()0.5mM+mgcl()2.5mM+asc()10mM+kcl()3.0mM+PSI(psaBxH20_sWT_d241111)250nM+C6(GCr_E70Q)2.5uM+mv()1mM-353
Cycle	120			Exp	352	352	352	352	352	352	352	352	352	352	352	352	352	352	352	352	352	352	352	352	352	352	352	352	352	352	352	353	353	353	353	353	353	353	353	353	353	353	353	353	353	353	353	353	353
Lz S point	20			Sheet	raw	raw	raw	raw	raw	raw	raw	raw	raw	raw	raw	raw	raw	raw	raw	raw	raw	raw	raw	raw	raw	raw	raw	raw	raw	raw	raw	raw	raw	raw	raw	raw	raw	raw	raw	raw	raw	raw	raw	raw	raw	raw	raw	raw	raw
Lz rows	120			Data nr			1			2			3			4			5			6			7			8			9			10			11			12			13			14			15
				Ref Col	8	10	8	12	14	12	16	18	16	20	22	20	24	26	24	28	30	28	32	34	32	36	38	36	40	42	40	44	46	44	48	50	48	52	54	52	56	58	56	60	62	60	64	66	64
Start				WL	705	740	P700	705	740	P700	705	740	P700	705	740	P700	705	740	P700	705	740	P700	705	740	P700	705	740	P700	705	740	P700	705	740	P700	705	740	P700	705	740	P700	705	740	P700	705	740	P700	705	740	P700
Lz reps	4			Lz deltas
pre	20			1			49.0704			65.2922			64.067			62.3148			62.5662			63.6017			58.8288			61.4983			60.5777			61.5908			61.53			61.0764			59.5638			58.6655			56.389
L meas	100			2			63.9949			65.022			63.6474			62.6928			63.2561			63.4792			60.7669			61.5051			60.8984			63.1831			61.6671			60.5113			59.9579			58.8249			58.0852
after				3			64.6952			64.9434			63.3352			63.4141			63.6999			65.5746			61.4448			60.2838			60.7461			62.3464			59.691			59.9927			59.7926			59.2969			58.0919
Laser	120			4			65.9665			64.6096			63.2277			64.2086			62.9314			64.1543			61.3079			60.7707			62.1171			63.4702			60.1698			60.5508			60.6329			59.4022			57.4557
				avg corr			64.8856			64.9668			63.4034			63.1576			63.1134			64.2024			60.5871			61.0145			61.0848			62.9999			60.7645			60.5328			59.9868			59.0474			57.5054
162				avg			60.9318			64.9668			63.5693			63.1576			63.1134			64.2024			60.5871			61.0145			61.0848			62.6476			60.7645			60.5328			59.9868			59.0474			57.5054
				err			13.0467			0.432686			0.592276			1.32372			0.763664			1.49646			1.99417			0.977973			1.14681			1.35788			1.6199			0.731325			0.76691			0.605558			1.39442
				Take Lz flash			234			1234			234			1234			1234			1234			1234			1234			1234			234			1234			1234			1234			1234			1234
				Lz Yshift			-0.764421			-0.0699269			0.189815			-5.11063			0.311742			-0.198037			0.727993			-0.1047			0.0205739			-6.45384			0.468847			-0.0878039			0.308662			0.324323			0.260496
Sheet	raw
Col count	3
Nr WL	2
Nr of calc	1
	Lz X shift
	1.00406
					705	740	P700	705	740	P700	705	740	P700	705	740	P700	705	740	P700	705	740	P700	705	740	P700	705	740	P700	705	740	P700	705	740	P700	705	740	P700	705	740	P700	705	740	P700	705	740	P700	705	740	P700
0.0502029	-953.855			-953.855	30.5807	28.9259	1.6548	10.2713	9.5821	0.68915	-28.4848	-11.4561	-17.0287	-30.7368	-9.38932	-21.3474	8.78038	7.8477	0.93268	1.46275	0.982239	0.480511	8.85643	6.00159	2.85484	3.4596	3.26391	0.19569	4.83571	3.36322	1.47249	51.2351	45.1048	6.13034	11.7481	8.16053	3.58756	5.22394	5.52895	-0.30501	8.17034	7.36522	0.80512	9.95754	9.06485	0.89269	4.02515	3.85947	0.16568
0.100406	-903.652			-903.652	30.3307	28.5153	1.81543	9.30214	9.42582	-0.12368	-29.044	-12.2341	-16.8099	-31.4578	-9.48612	-21.9717	9.16425	7.61657	1.54768	0.174175	0.14739	0.0267846	7.87921	5.70166	2.17755	2.93017	2.91308	0.01709	4.947	4.05816	0.88884	50.0054	44.057	5.94837	11.822	8.28063	3.54135	5.01893	5.00056	0.01837	7.32008	7.01336	0.30672	8.21884	7.79791	0.42093	4.12127	3.64129	0.47998
0.150609	-853.449			-853.449	29.48	27.2305	2.24958	9.24453	8.4114	0.83313	-28.8405	-12.0524	-16.7881	-31.0189	-9.84651	-21.1724	7.24051	6.17065	1.06986	0.438496	0.738345	-0.299849	7.91043	4.92603	2.9844	2.12765	1.68116	0.44649	3.87574	3.04756	0.82818	47.8452	43.4054	4.43972	11.5243	8.51203	3.01225	3.47993	4.5986	-1.11867	7.44602	6.7986	0.64742	8.35148	7.884	0.46748	3.05667	2.99693	0.05974
0.200812	-803.246			-803.246	29.7158	27.5825	2.13337	7.2885	7.01937	0.26913	-29.5475	-13.1451	-16.4023	-31.3808	-9.7747	-21.6061	6.66855	6.29062	0.37793	1.10793	0.294952	0.812978	7.48673	4.8577	2.62903	2.15685	2.0003	0.15655	3.77282	2.7123	1.06052	46.9129	42.2769	4.63603	10.9579	8.00724	2.95063	2.87167	3.7558	-0.88413	5.23756	5.35695	-0.11939	8.99817	8.04563	0.95254	3.07622	2.8363	0.23992
0.251014	-753.043			-753.043	28.8872	27.3162	1.57097	7.22495	7.46555	-0.2406	-29.682	-13.2334	-16.4486	-32.361	-10.6778	-21.6831	6.06559	5.75993	0.30566	-0.569	0.0910524	-0.660052	6.55292	4.88423	1.66869	1.85988	1.88682	-0.02694	3.65203	2.79872	0.85331	46.9694	42.383	4.58638	10.3722	6.93052	3.44173	3.19122	4.29692	-1.1057	6.11681	5.38343	0.73338	7.56738	6.81174	0.75564	2.65621	2.30824	0.34797
0.301217	-702.841			-702.841	29.1672	27.1296	2.03763	8.38526	7.12453	1.26073	-30.2679	-13.2356	-17.0323	-32.7929	-11.2736	-21.5192	6.97482	6.58595	0.38887	-0.915	0.142274	-1.05727	5.86639	3.96712	1.89927	0.789104	1.56088	-0.771776	2.28154	1.87693	0.40461	47.1162	41.931	5.18527	9.54355	6.81388	2.72967	2.97495	3.77122	-0.79627	5.36968	4.80289	0.56679	7.56754	6.89881	0.66873	2.24663	2.68849	-0.44186
0.35142	-652.638			-652.638	28.1003	26.4625	1.63784	8.27429	7.4571	0.81719	-30.4938	-13.8148	-16.679	-32.7008	-11.0109	-21.6899	6.09731	4.94858	1.14873	-0.371	-0.221	-0.15	6.86316	4.12304	2.74012	0.905002	1.13699	-0.231988	3.59042	2.42483	1.16559	46.4043	41.3341	5.07019	10.3773	7.31464	3.0627	2.39299	3.12486	-0.73187	5.37004	5.43855	-0.06851	7.95434	6.72986	1.22448	2.15828	2.15504	0.00324
0.401623	-602.435			-602.435	28.0269	26.6246	1.40232	7.70389	7.59704	0.10685	-30.534	-13.3879	-17.1461	-32.9962	-11.179	-21.8172	6.14371	5.76191	0.3818	-1.20694	-0.313	-0.89394	6.28031	3.82445	2.45586	0.462875	0.779991	-0.317116	3.04375	2.2193	0.82445	47.7228	42.1448	5.57803	10.4724	6.9624	3.50998	2.92188	3.44634	-0.52446	5.01094	4.88746	0.12348	7.69855	6.74096	0.95759	2.64206	2.73615	-0.09409
0.451826	-552.232			-552.232	26.8215	25.0572	1.76434	6.79814	6.55358	0.24456	-30.2158	-14.2451	-15.9707	-32.8848	-11.2016	-21.6832	5.90133	5.26919	0.63214	-0.358	-0.276	-0.082	6.3345	3.91511	2.41939	1.35959	1.19998	0.15961	2.98294	1.7575	1.22544	46.3403	41.2307	5.10959	10.2254	7.02384	3.20153	2.40769	3.11102	-0.70333	4.63071	4.54483	0.08588	7.83218	7.25705	0.57513	1.8597	1.81041	0.04929
0.502029	-502.029			-502.029	27.6824	25.8616	1.82082	7.11085	6.56669	0.54416	-30.6266	-13.6985	-16.9281	-33.0106	-11.2982	-21.7124	6.05302	5.28699	0.76603	-0.776	0.15326	-0.92926	5.84179	3.59221	2.24958	1.20787	1.35927	-0.1514	2.67174	2.27786	0.39388	46.0167	41.2202	4.79651	9.82435	7.01656	2.80779	2.68716	2.93442	-0.24726	5.99698	4.95211	1.04487	7.60488	6.36538	1.2395	2.38745	2.05576	0.33169
0.552232	-451.826			-451.826	27.6918	25.9473	1.74454	6.52461	6.81021	-0.2856	-32.3195	-14.8315	-17.488	-32.2423	-10.9449	-21.2974	5.99893	5.3033	0.69563	-1.7505	-0.839	-0.9115	5.80972	3.8809	1.92882	1.529	1.7369	-0.2079	3.03304	2.70367	0.32937	46.4237	41.7005	4.72318	10.0122	5.98802	4.02419	2.75927	3.80145	-1.04218	5.28605	4.94321	0.34284	7.64571	6.88414	0.76157	0.548736	1.37416	-0.825424
0.602435	-401.623			-401.623	28.068	26.0633	2.00477	7.93106	7.06857	0.86249	-31.0191	-14.7179	-16.3011	-33.4553	-11.3963	-22.059	6.30121	5.22553	1.07568	-1.52561	-0.608	-0.91761	6.4775	4.13195	2.34555	0.741082	1.10683	-0.365748	3.04311	2.13418	0.90893	44.7978	40.8698	3.92807	8.75505	6.18159	2.57346	1.83508	3.32055	-1.48547	5.11449	5.08705	0.02744	7.35617	7.0452	0.31097	2.70274	1.91086	0.79188
0.652638	-351.42			-351.42	28.202	25.7495	2.45245	7.68332	7.4399	0.24342	-30.9895	-13.6837	-17.3058	-32.9608	-11.6985	-21.2623	5.15258	4.41221	0.74037	-1.21678	-0.429	-0.78778	5.18036	3.34784	1.83252	0.701118	0.894444	-0.193326	2.72972	1.98514	0.74458	44.5746	40.5608	4.01378	8.81569	6.08035	2.73534	3.17369	2.98857	0.18512	4.68236	4.68891	-0.00655	6.53649	5.89089	0.6456	2.43078	2.6448	-0.21402
0.702841	-301.217			-301.217	26.9755	25.1387	1.83676	7.89275	7.42597	0.46678	-30.885	-14.1768	-16.7082	-33.2633	-11.8178	-21.4454	6.20902	5.45831	0.75071	-1.26483	-0.646	-0.61883	6.17492	3.74864	2.42628	-0.0453	0.764837	-0.810137	3.08472	2.29939	0.78533	45.7668	40.1185	5.6484	9.73087	6.47081	3.26006	2.73013	3.2667	-0.53657	5.38581	4.82956	0.55625	7.32801	6.31336	1.01465	2.87188	2.17322	0.69866
0.753043	-251.014			-251.014	26.851	24.5682	2.28283	7.42683	7.06688	0.35995	-30.0321	-13.9026	-16.1295	-33.4119	-11.9808	-21.4311	5.83455	5.08971	0.74484	-1.13651	-0.594	-0.54251	5.73225	4.0749	1.65735	0.634983	1.0454	-0.410417	2.03392	1.4226	0.61132	44.9231	39.8799	5.04319	8.80231	6.01252	2.78979	2.67576	3.71017	-1.03441	5.08607	5.11015	-0.02408	7.19828	6.71503	0.48325	1.73898	1.68426	0.05472
0.803246	-200.812			-200.812	27.0166	25.2568	1.75982	6.8295	6.6266	0.2029	-30.9212	-14.5973	-16.3239	-34.1051	-12.0123	-22.0928	6.22641	5.06821	1.1582	-0.733	-0.0381	-0.6949	6.18361	4.25611	1.9275	1.11884	1.51008	-0.39124	2.75015	1.77896	0.97119	44.6501	39.9805	4.66954	9.92427	6.72913	3.19514	2.98779	3.49835	-0.51056	4.73964	4.72905	0.01059	7.3374	6.49602	0.84138	1.28113	1.53001	-0.24888
0.853449	-150.609			-150.609	26.687	24.8055	1.88151	6.97979	6.37985	0.59994	-31.5742	-15.0661	-16.5081	-33.8643	-12.5416	-21.3227	5.81137	5.66239	0.14898	-0.522	-0.252	-0.27	6.92316	4.94727	1.97589	0.630766	0.895248	-0.264481	3.33375	1.92865	1.4051	44.0022	39.3527	4.64958	9.51377	5.82698	3.68679	2.76966	2.98649	-0.21683	4.80535	4.81167	-0.00632	7.2912	6.63436	0.65684	1.37298	1.95693	-0.58395
0.903652	-100.406			-100.406	27.5953	25.3723	2.22301	7.27966	6.54728	0.73238	-32.1038	-14.829	-17.2748	-33.5493	-11.7107	-21.8386	5.57801	4.71186	0.86615	-1.32523	-0.358	-0.96723	6.03204	3.75679	2.27525	1.40009	1.6181	-0.21801	3.80595	2.36294	1.44301	43.92	39.0348	4.88521	9.51688	6.28426	3.23262	2.32385	2.74703	-0.42318	5.37645	4.84617	0.53028	5.96275	5.58825	0.3745	1.8476	2.53126	-0.68366
0.953855	-50.2029			-50.2029	27.038	24.846	2.192	7.65396	7.35189	0.30207	-31.9691	-14.7402	-17.2289	-34.131	-12.3	-21.831	6.15717	4.92748	1.22969	-1.12272	-0.438	-0.68472	5.9745	3.69657	2.27793	0.105473	0.850051	-0.744578	2.02702	1.56143	0.46559	44.5929	38.9783	5.61456	8.70502	5.57018	3.13484	2.51278	3.28174	-0.76896	4.36479	4.66189	-0.2971	6.62228	6.68694	-0.06466	2.2355	2.08327	0.15223
1.00406	-0.001			-0.001	25.668	24.34	1.32799	7.27124	6.58039	0.69085	-30.7088	-13.8428	-16.866	-34.1958	-12.6828	-21.5129	5.89483	5.90399	-0.00916	-0.962	-0.152	-0.81	6.49301	4.2817	2.21131	0.585524	1.12296	-0.537436	2.84999	2.01296	0.83703	44.6224	39.464	5.15835	9.584	6.34497	3.23903	1.97365	3.20347	-1.22982	4.71557	4.92549	-0.20992	6.51316	6.04104	0.47212	0.870711	1.17301	-0.302299
1.00492	0.8604			0.8604	-20.6402	26.7818	-47.422	-57.3678	7.30979	-64.6776	-95.8655	-14.487	-81.3785	-96.6417	-12.3815	-84.2601	-57.9276	3.96804	-61.8956	-65.6944	-0.607	-65.0874	-52.6174	4.43277	-57.0502	-61.8345	0.471536	-62.306	-59.6268	0.94784	-60.5747	-18.2072	38.8598	-57.067	-52.458	5.89791	-58.3559	-58.6153	2.65158	-61.2668	-55.2576	4.12205	-59.3796	-52.391	5.56545	-57.9565	-56.616	0.592226	-57.2082
1.00566	1.6045			1.6045	-18.4954	28.1837	-46.679	-55.2236	9.87745	-65.1011	-91.7317	-11.337	-80.3947	-93.524	-9.89609	-83.6279	-54.3755	7.22609	-61.6016	-62.4344	1.14644	-63.5808	-49.8887	6.5393	-56.428	-58.8014	2.64073	-61.4421	-55.0129	3.9562	-58.9691	-14.927	41.5931	-56.5201	-50.6986	7.71746	-58.416	-57.2959	4.806	-62.1019	-53.236	6.0763	-59.3123	-50.8628	7.25892	-58.1217	-52.2283	3.44677	-55.6751
1.00645	2.3955			2.3955	-19.7075	27.5811	-47.2886	-55.1375	8.87241	-64.0099	-91.2891	-11.5457	-79.7434	-92.8634	-9.6925	-83.1709	-54.0937	6.8784	-60.9721	-61.024	1.52058	-62.5446	-48.5256	6.28617	-54.8118	-55.4983	3.19781	-58.6961	-53.8787	3.73908	-57.6178	-15.9509	40.7725	-56.7234	-49.2478	8.11034	-57.3581	-55.5561	4.56673	-60.1229	-52.5678	5.91204	-58.4799	-48.4478	8.44996	-56.8978	-51.6403	4.48768	-56.128
1.00729	3.2363			3.2363	-19.2196	27.683	-46.9026	-54.8225	8.36957	-63.1921	-90.371	-10.9215	-79.4495	-91.626	-10.1827	-81.4433	-51.5622	7.4499	-59.0121	-60.5061	1.06301	-61.5691	-46.4881	6.04756	-52.5357	-53.8567	3.28141	-57.1381	-51.7449	4.13793	-55.8828	-15.2424	41.2696	-56.512	-49.055	8.0473	-57.1023	-53.9034	4.21509	-58.1185	-50.8347	6.18879	-57.0235	-47.8375	7.4438	-55.2813	-49.0609	3.47044	-52.5313
1.00819	4.1301			4.1301	-19.5473	26.6965	-46.2437	-52.8369	9.93054	-62.7675	-90.1083	-11.936	-78.1723	-90.3282	-9.82539	-80.5028	-50.9665	7.2009	-58.1674	-57.7513	1.10255	-58.8538	-46.1768	5.67417	-51.8509	-53.5631	2.49345	-56.0565	-49.1457	4.55684	-53.7025	-14.487	41.3909	-55.8779	-47.6031	8.30719	-55.9103	-53.5603	4.87383	-58.4341	-50.6068	6.09309	-56.6999	-45.1347	8.63045	-53.7651	-47.3663	3.76522	-51.1315
1.00914	5.0803			5.0803	-18.2262	26.7363	-44.9625	-53.2058	8.91807	-62.1239	-88.0777	-11.3874	-76.6903	-89.8337	-10.2528	-79.581	-49.0389	6.6799	-55.7188	-55.6344	1.26983	-56.9042	-43.5007	6.35135	-49.852	-50.1036	3.37835	-53.4819	-47.1087	3.66034	-50.7691	-13.5431	41.7598	-55.3029	-47.7165	8.06973	-55.7862	-51.5904	5.26654	-56.857	-47.2801	7.21349	-54.4936	-44.5813	7.89455	-52.4758	-46.8923	3.55184	-50.4442
1.01015	6.0903			6.0903	-17.4786	26.7451	-44.2237	-50.9932	9.23945	-60.2327	-87.9385	-12.1987	-75.7398	-88.7603	-10.1329	-78.6275	-47.3298	6.95067	-54.2804	-55.0439	0.866193	-55.9101	-41.0523	5.94917	-47.0014	-49.6549	2.62078	-52.2757	-46.5842	3.60751	-50.1917	-13.0438	41.7805	-54.8244	-47.6629	7.40614	-55.069	-50.2043	5.32925	-55.5336	-46.7466	6.55899	-53.3056	-42.1206	8.60104	-50.7216	-44.4827	3.58538	-48.0681
1.01122	7.164			7.164	-18.0829	26.8451	-44.928	-50.2661	9.3586	-59.6247	-85.7546	-11.6463	-74.1083	-85.4502	-9.53843	-75.9117	-46.7982	7.06839	-53.8666	-52.7937	1.28918	-54.0829	-40.8095	5.52924	-46.3387	-46.4595	3.16149	-49.621	-43.7216	4.19834	-47.92	-12.49	41.2178	-53.7078	-44.8387	8.32818	-53.1668	-49.9942	4.63818	-54.6324	-45.5851	6.69847	-52.2836	-40.4829	7.84231	-48.3252	-41.9507	3.63232	-45.5831
1.01236	8.3054			8.3054	-16.7604	27.1476	-43.908	-49.5655	9.74347	-59.309	-84.6269	-11.5069	-73.12	-84.6503	-9.51835	-75.1319	-44.6769	7.50547	-52.1823	-49.5537	1.44406	-50.9977	-37.5402	6.47787	-44.018	-45.3085	2.8855	-48.194	-41.6448	4.06162	-45.7064	-11.6187	40.7952	-52.4139	-43.9057	8.5765	-52.4822	-48.6765	4.72128	-53.3977	-44.6311	6.54933	-51.1805	-38.6311	8.42539	-47.0565	-40.0003	4.4673	-44.4676
1.01358	9.5187			9.5187	-16.5763	26.7554	-43.3317	-49.2909	9.27359	-58.5645	-84.4983	-11.3009	-73.1974	-83.3244	-9.64565	-73.6787	-42.2823	7.83473	-50.1171	-49.0744	1.13502	-50.2094	-36.9618	6.08419	-43.046	-42.4645	3.33353	-45.7981	-38.7399	3.93476	-42.6746	-10.7416	41.6724	-52.4139	-43.5056	8.61177	-52.1173	-47.051	5.40828	-52.4593	-41.6503	7.56108	-49.2114	-36.382	8.63032	-45.0124	-38.4317	4.13853	-42.5702
1.01487	10.8085			10.8085	-16.3401	26.1514	-42.4915	-48.1425	9.62666	-57.7691	-81.5603	-11.2324	-70.3279	-81.3335	-9.3108	-72.0227	-40.1423	7.52207	-47.6643	-46.0339	1.32457	-47.3585	-34.9336	5.81525	-40.7488	-41.0425	2.93509	-43.9776	-36.9335	4.03904	-40.9725	-10.2315	41.1977	-51.4292	-41.902	8.89191	-50.7939	-44.9032	5.4568	-50.36	-40.2337	7.24589	-47.4796	-34.0896	8.98818	-43.0778	-36.556	3.67092	-40.2269
1.01624	12.1796			12.1796	-15.0192	26.9787	-41.9978	-45.7052	10.2827	-55.9879	-80.8686	-11.756	-69.1126	-79.8781	-9.5703	-70.3078	-39.492	7.50147	-46.9935	-44.7726	1.72648	-46.499	-33.1835	5.78766	-38.9711	-39.3962	2.23169	-41.6279	-34.5526	4.0792	-38.6318	-7.77506	42.3355	-50.1106	-41.3621	8.45329	-49.8154	-43.7595	5.52915	-49.2886	-38.4449	7.50997	-45.9549	-33.1465	8.50159	-41.6481	-35.3126	3.97592	-39.2885
1.0177	13.6371			13.6371	-14.4707	27.2741	-41.7448	-46	9.33561	-55.3356	-80.4063	-12.0091	-68.3972	-78.6256	-9.4769	-69.1487	-37.1082	7.08731	-44.1956	-41.8309	1.46859	-43.2995	-29.7362	6.05554	-35.7918	-36.5279	3.50655	-40.0345	-33.0676	3.51219	-36.5798	-7.27679	41.883	-49.1598	-39.3096	8.58239	-47.892	-41.7309	5.39259	-47.1234	-37.7023	6.43943	-44.1417	-31.2172	8.51412	-39.7313	-32.8744	3.62984	-36.5043
1.01924	15.1864			15.1864	-13.8121	27.1328	-40.9449	-44.5055	9.52076	-54.0263	-77.9363	-11.4444	-66.4919	-77.8049	-9.74596	-68.0589	-35.2418	7.20963	-42.4514	-40.5817	1.40668	-41.9884	-28.1291	6.70357	-34.8327	-34.8139	3.1005	-37.9144	-30.4197	4.37366	-34.7934	-6.99431	41.6247	-48.6191	-38.2036	8.63382	-46.8374	-40.7962	5.34555	-46.1418	-34.8695	6.63972	-41.5092	-29.0812	8.91038	-37.9916	-31.9234	3.9162	-35.8396
1.02089	16.8334			16.8334	-13.4435	26.6812	-40.1248	-42.7479	9.26805	-52.0159	-76.74	-11.6498	-65.0902	-75.2672	-8.92451	-66.3427	-33.7529	7.54538	-41.2983	-39.9715	0.435723	-40.4073	-27.1283	6.22757	-33.3559	-34.0468	2.67773	-36.7245	-28.9383	4.18005	-33.1183	-4.95926	42.1267	-47.086	-37.1593	8.57682	-45.7361	-39.6525	5.16948	-44.822	-34.5276	6.35725	-40.8849	-28.2248	7.76004	-35.9848	-29.7839	3.56195	-33.3458
1.02264	18.5842			18.5842	-11.9349	27.224	-39.159	-41.2374	9.15482	-50.3923	-74.433	-11.841	-62.592	-73.0404	-9.38195	-63.6584	-32.9049	6.93715	-39.8421	-37.8214	0.872699	-38.6941	-25.7857	5.18901	-30.9747	-31.5912	3.01612	-34.6073	-27.2418	3.92029	-31.1621	-5.66079	40.8486	-46.5094	-36.7448	8.59595	-45.3408	-37.7361	4.72629	-42.4624	-33.8372	6.13196	-39.9692	-26.6151	8.5468	-35.1619	-28.6716	2.93198	-31.6036
1.0245	20.4454			20.4454	-11.2044	27.8001	-39.0044	-40.0516	9.97679	-50.0284	-73.9854	-11.7862	-62.1992	-71.5363	-9.14403	-62.3923	-29.8431	6.99504	-36.8381	-34.7498	1.49562	-36.2455	-23.1801	6.49047	-29.6706	-29.4686	3.64208	-33.1107	-26.1594	3.57799	-29.7374	-2.86409	42.1924	-45.0565	-35.4058	8.64611	-44.0519	-36.8399	5.33844	-42.1783	-30.537	6.97264	-37.5096	-24.9952	8.54825	-33.5435	-26.771	3.30936	-30.0803
1.02648	22.4239			22.4239	-10.317	27.0812	-37.3982	-40.845	9.31324	-50.1582	-72.5072	-12.0462	-60.461	-69.658	-9.67749	-59.9805	-27.9329	7.53184	-35.4647	-34.4243	0.681951	-35.1063	-22.7644	5.46304	-28.2275	-28.8845	2.08364	-30.9681	-24.2425	3.20882	-27.4513	-1.76896	42.2017	-43.9706	-34.2062	8.39596	-42.6021	-34.799	4.70206	-39.5011	-29.3117	6.85606	-36.1678	-22.832	8.53859	-31.3706	-23.9812	3.74198	-27.7232
1.02859	24.5271			24.5271	-8.89518	27.701	-36.5962	-38.5243	9.34283	-47.8671	-71.5126	-12.3683	-59.1443	-69.6665	-10.0553	-59.6112	-27.4603	7.01401	-34.4743	-31.2641	0.879018	-32.1431	-19.8709	6.66065	-26.5315	-25.8548	3.07082	-28.9256	-23.3368	3.3406	-26.6774	-1.02556	42.0592	-43.0847	-33.169	7.99879	-41.1678	-34.9332	4.28915	-39.2223	-27.7946	6.66869	-34.4633	-21.2316	8.07557	-29.3072	-22.9413	3.73342	-26.6748
1.03082	26.7628			26.7628	-8.53455	27.1292	-35.6637	-36.6446	9.31838	-45.963	-69.5248	-12.1156	-57.4093	-66.4377	-9.52506	-56.9126	-24.4719	7.30934	-31.7813	-29.7064	0.553864	-30.2602	-18.2469	5.96375	-24.2107	-25.7713	1.68915	-27.4605	-21.5603	3.41766	-24.9779	-0.374	41.3731	-41.7471	-31.621	8.74176	-40.3628	-33.4488	4.56041	-38.0092	-26.1555	7.3553	-33.5108	-20.2762	8.21685	-28.493	-21.5535	3.14103	-24.6946
1.0332	29.1394			29.1394	-7.35547	26.8937	-34.2492	-36.9243	8.61624	-45.5406	-67.9939	-12.7433	-55.2506	-66.4061	-10.9373	-55.4688	-22.9887	7.06286	-30.0515	-28.3412	0.482864	-28.824	-16.821	5.90538	-22.7264	-23.2008	2.65621	-25.8571	-19.7438	3.12824	-22.8721	1.36052	42.0758	-40.7153	-29.4387	8.16681	-37.6056	-31.3825	4.44511	-35.8276	-25.019	6.65894	-31.6779	-18.3452	7.92262	-26.2678	-21.7034	2.59893	-24.3023
1.03572	31.6658			31.6658	-7.41079	27.0344	-34.4452	-34.0336	9.298	-43.3316	-65.8381	-12.2232	-53.6149	-64.0387	-9.68486	-54.3539	-21.3982	7.02999	-28.4282	-26.0073	0.975734	-26.983	-14.6443	5.95401	-20.5983	-21.825	2.31829	-24.1433	-18.8012	2.67461	-21.4758	1.05102	41.0933	-40.0423	-28.5599	8.68128	-37.2412	-28.6666	5.03281	-33.6994	-24.3298	6.20528	-30.5351	-16.867	7.99761	-24.8646	-18.6638	3.12916	-21.7929
1.03841	34.3514			34.3514	-6.13077	26.4847	-32.6155	-32.6345	9.50907	-42.1436	-64.9812	-12.6376	-52.3436	-61.9859	-10.0697	-51.9162	-19.6274	6.75216	-26.3796	-25.04	0.962261	-26.0022	-14.6927	5.36995	-20.0627	-19.6064	3.01195	-22.6183	-17.6574	2.82716	-20.4846	2.50365	41.5377	-39.034	-28.7261	7.30295	-36.0291	-28.1348	4.35988	-32.4947	-21.8642	7.09815	-28.9624	-15.6687	7.75833	-23.427	-17.057	3.23445	-20.2914
1.04126	37.2063			37.2063	-5.76405	25.9685	-31.7326	-30.5076	9.54806	-40.0556	-62.6693	-12.2511	-50.4182	-61.396	-10.6683	-50.7277	-18.271	6.59694	-24.8679	-23.7667	0.513943	-24.2807	-12.3749	5.47727	-17.8522	-18.9645	1.93401	-20.8985	-15.6225	3.04846	-18.671	4.32258	41.7882	-37.4656	-26.1808	7.72517	-33.906	-26.4341	4.17912	-30.6132	-19.9986	6.79592	-26.7945	-13.6565	7.67758	-21.3341	-16.5056	2.82391	-19.3295
1.0443	40.2411			40.2411	-4.2265	26.5358	-30.7623	-29.9843	9.59855	-39.5828	-61.3203	-12.0175	-49.3028	-59.425	-10.3646	-49.0604	-17.9442	5.97735	-23.9215	-22.0774	0.561288	-22.6387	-12.6081	4.65865	-17.2667	-17.0913	2.76873	-19.86	-14.7832	3.283	-18.0662	5.7977	41.1371	-35.3394	-23.8086	7.91437	-31.7229	-24.932	4.17613	-29.1081	-18.9963	6.30448	-25.3008	-12.7156	7.15219	-19.8678	-14.4225	3.32696	-17.7495
1.04753	43.4672			43.4672	-2.81531	26.5795	-29.3948	-28.3308	9.04979	-37.3806	-58.4866	-11.8984	-46.5882	-57.4002	-9.92151	-47.4786	-14.6659	6.60529	-21.2711	-20.1579	0.925483	-21.0834	-9.94078	5.21298	-15.1538	-16.2488	1.91757	-18.1664	-13.2771	3.12451	-16.4016	6.70093	41.1331	-34.4322	-22.9045	8.61344	-31.5179	-23.0548	4.92905	-27.9839	-18.0844	5.79579	-23.8802	-11.2152	7.38833	-18.6036	-13.4933	2.48093	-15.9742
1.05095	46.8966			46.8966	-2.03671	26.2092	-28.2459	-26.4028	9.53014	-35.9329	-59.0391	-12.9443	-46.0948	-56.1683	-10.4534	-45.7149	-14.5271	5.76527	-20.2923	-18.5561	0.82464	-19.3807	-9.31679	5.48665	-14.8034	-14.2849	2.51877	-16.8037	-12.0924	2.9353	-15.0277	8.6806	41.0617	-32.3811	-21.1804	7.98532	-29.1657	-21.9932	4.43241	-26.4256	-16.6097	5.60468	-22.2144	-10.2404	7.08288	-17.3233	-12.6865	2.6991	-15.3856
1.0546	50.5422			50.5422	0.214038	26.6716	-26.4576	-25.9378	8.64621	-34.584	-57.0576	-13.2422	-43.8154	-54.107	-10.2139	-43.893	-13.3543	5.89935	-19.2537	-18.0634	0.578641	-18.642	-7.97915	5.0084	-12.9875	-13.4344	2.07271	-15.5071	-10.5459	3.14529	-13.6912	9.92113	41.6489	-31.7277	-21.4351	7.23032	-28.6654	-20.478	3.55338	-24.0313	-14.8972	5.65439	-20.5516	-8.30618	7.27725	-15.5834	-11.383	2.63283	-14.0158
1.05848	54.4175			54.4175	1.30845	26.6558	-25.3473	-23.1514	9.01354	-32.165	-56.1143	-13.7143	-42.4	-52.7429	-10.7096	-42.0333	-11.9137	5.76222	-17.6759	-16.467	0.518562	-16.9856	-6.80104	4.96709	-11.7681	-12.7225	1.93924	-14.6617	-10.3311	2.67589	-13.007	10.9825	40.708	-29.7255	-18.4399	7.85577	-26.2957	-18.5702	3.94818	-22.5184	-13.8856	5.33808	-19.2237	-7.91636	6.57758	-14.4939	-10.9852	2.11286	-13.0981
1.0626	58.5371			58.5371	2.30107	26.9228	-24.6217	-22.359	9.11709	-31.4761	-52.3825	-12.7481	-39.6345	-52.1705	-11.3177	-40.8528	-10.4195	6.33053	-16.7501	-16.2843	-0.00477	-16.2796	-5.59461	5.59067	-11.1853	-11.6793	2.18344	-13.8627	-10.1238	2.49653	-12.6204	12.7242	41.3583	-28.6341	-16.7177	7.46491	-24.1826	-17.6701	3.34713	-21.0172	-12.3082	5.62374	-17.932	-5.69976	7.12714	-12.8269	-8.7788	2.25319	-11.032
1.06697	62.9163			62.9163	2.96395	26.3797	-23.4158	-20.6522	8.4719	-29.1241	-51.6856	-13.2019	-38.4837	-49.2981	-10.2462	-39.0519	-7.84212	6.64525	-14.4874	-14.5455	0.224864	-14.7704	-4.3929	5.16271	-9.55561	-12.0188	1.41388	-13.4327	-9.39963	2.16751	-11.5671	14.6652	40.9328	-26.2676	-15.9405	7.39825	-23.3387	-15.8954	3.97939	-19.8748	-10.627	5.70504	-16.3321	-6.17727	6.80379	-12.9811	-8.62307	2.89924	-11.5223
1.07163	67.5715			67.5715	3.91238	26.8857	-22.9733	-18.9186	8.4687	-27.3873	-49.5689	-13.0638	-36.5051	-48.2866	-11.2965	-36.9901	-8.2193	5.65435	-13.8737	-13.2361	0.156675	-13.3928	-3.46941	5.68094	-9.15035	-9.88439	1.59726	-11.4817	-8.73932	1.92878	-10.6681	15.0088	40.7185	-25.7096	-14.1895	7.40138	-21.5909	-14.0366	3.93854	-17.9752	-8.96873	5.74722	-14.7159	-4.31992	6.78776	-11.1077	-7.47617	2.47998	-9.95615
1.07658	72.5201			72.5201	4.09238	25.4917	-21.3993	-17.6582	8.67595	-26.3341	-47.9054	-13.2373	-34.6681	-47.6493	-10.7783	-36.871	-6.47429	5.69682	-12.1711	-12.4879	-0.0407	-12.4472	-2.86384	5.07456	-7.9384	-9.24976	1.64012	-10.8899	-6.20286	2.98087	-9.18373	17.4935	40.8128	-23.3193	-11.936	7.52496	-19.461	-12.5048	3.9045	-16.4093	-8.06069	5.77227	-13.833	-3.13023	7.09127	-10.2215	-7.74068	1.77346	-9.51414
1.08184	77.7806			77.7806	6.25369	26.8105	-20.5568	-15.2345	8.75365	-23.9882	-45.6629	-12.6807	-32.9822	-46.1297	-10.9904	-35.1392	-3.92525	6.56822	-10.4935	-11.9899	-0.23	-11.7599	-2.59492	4.65687	-7.25179	-9.06618	1.15927	-10.2254	-6.42266	2.56837	-8.99103	19.063	40.9223	-21.8593	-10.791	7.12117	-17.9122	-11.3667	4.30289	-15.6696	-7.2862	5.62047	-12.9067	-3.1482	6.34752	-9.49572	-5.18302	2.85822	-8.04124
1.08743	83.3727			83.3727	7.45601	26.3243	-18.8683	-14.3394	8.27527	-22.6146	-44.8918	-12.5131	-32.3787	-44.4752	-10.7058	-33.7694	-3.99534	6.07605	-10.0714	-10.8274	-0.115	-10.7124	-0.798	5.42133	-6.21933	-7.28753	1.53484	-8.82237	-5.35124	1.87027	-7.22151	20.1302	40.2887	-20.1584	-8.89403	7.15533	-16.0494	-10.2827	3.51038	-13.793	-5.82714	5.43489	-11.262	-1.18165	7.34708	-8.52873	-5.18418	2.42736	-7.61154
1.09338	89.3172			89.3172	8.36657	25.8965	-17.5299	-12.2457	7.74084	-19.9866	-44.0313	-14.0667	-29.9646	-44.7796	-11.2198	-33.5599	-3.422	5.60424	-9.02624	-8.58916	0.343136	-8.9323	0.170774	5.60248	-5.43171	-6.32184	1.16762	-7.48946	-4.42988	2.12389	-6.55377	21.4124	40.3526	-18.9402	-8.94139	6.9456	-15.887	-9.59044	3.34244	-12.9329	-4.65556	5.65863	-10.3142	-1.03508	6.57573	-7.61081	-4.83265	2.19829	-7.03094
1.09969	95.6364			95.6364	9.53858	25.9235	-16.385	-11.1363	7.71404	-18.8503	-42.3514	-13.1081	-29.2433	-42.8014	-11.6872	-31.1143	-3.23273	5.14089	-8.37362	-8.58726	0.0694088	-8.65667	1.47043	5.60793	-4.1375	-6.1786	1.71105	-7.88965	-3.80341	2.40251	-6.20592	22.1876	40.3721	-18.1846	-6.56171	7.09961	-13.6613	-8.0337	3.90154	-11.9352	-3.5756	4.92259	-8.49819	0.705716	6.9036	-6.19788	-3.50578	2.56037	-6.06615
1.10641	102.354			102.354	11.6018	26.3117	-14.7099	-10.1624	7.93531	-18.0978	-41.619	-13.5867	-28.0323	-41.82	-11.0319	-30.7881	-0.865	5.51866	-6.38366	-6.8969	0.0141379	-6.91104	0.965259	4.87363	-3.90837	-5.83082	1.05308	-6.8839	-2.61532	1.83081	-4.44613	24.5915	39.9444	-15.3529	-5.46301	7.01416	-12.4772	-6.63564	3.41122	-10.0469	-3.04408	5.23432	-8.2784	1.58612	6.68232	-5.0962	-3.06753	2.0054	-5.07293
1.11355	109.495			109.495	12.764	26.3793	-13.6152	-8.20423	8.47174	-16.676	-40.7763	-14.0479	-26.7284	-40.421	-11.3229	-29.0982	0.0508229	5.5749	-5.52408	-7.53057	-0.266	-7.26457	0.962046	4.41085	-3.4488	-4.10027	1.70397	-5.80424	-2.39648	1.9866	-4.38308	25.5392	39.7839	-14.2447	-4.78981	7.3169	-12.1067	-6.65699	3.02865	-9.68564	-2.17451	5.01439	-7.1889	0.693979	5.91672	-5.22274	-3.35566	1.62068	-4.97634
1.12114	117.086			117.086	12.558	24.6993	-12.1413	-6.36277	8.05578	-14.4185	-38.9871	-13.5184	-25.4687	-41.1481	-12.051	-29.0971	0.570683	5.88263	-5.31195	-6.82971	-0.137	-6.69271	2.73822	5.09144	-2.35322	-4.37416	1.23562	-5.60978	-2.68809	1.97746	-4.66555	26.1182	39.5405	-13.4224	-2.63948	6.42095	-9.06043	-4.70672	2.97796	-7.68468	0.141447	5.43447	-5.29302	2.09733	6.79431	-4.69698	-2.15832	1.99969	-4.15801
1.12921	125.155			125.155	13.9134	25.5338	-11.6203	-4.89374	8.39849	-13.2922	-38.6682	-14.0215	-24.6467	-39.2977	-11.7379	-27.5599	1.32209	5.657	-4.33491	-5.48861	0.146268	-5.63488	3.09317	4.75181	-1.65864	-3.27789	1.68392	-4.96181	-0.608	2.49208	-3.10008	29.2219	39.8158	-10.594	-2.32609	6.3272	-8.65329	-3.2814	3.34949	-6.63089	-0.0385	4.99455	-5.03305	1.76354	5.76353	-3.99999	-1.19974	2.69856	-3.8983
1.13779	133.733			133.733	16.2632	25.6932	-9.43006	-3.72675	8.14116	-11.8679	-37.4968	-14.0598	-23.437	-38.6675	-11.2258	-27.4417	1.77635	5.44457	-3.66822	-5.36115	-0.268	-5.09315	3.22573	4.68465	-1.45892	-2.08582	2.23252	-4.31834	-1.63964	1.76837	-3.40801	29.1497	39.6163	-10.4666	-0.08	6.75459	-6.83459	-3.09623	3.27868	-6.37491	0.348383	5.29159	-4.94321	2.98788	6.58643	-3.59855	-1.06691	1.70179	-2.7687
1.14691	142.851			142.851	15.5909	24.6723	-9.08145	-3.41119	7.23686	-10.6481	-36.5385	-13.8118	-22.7267	-38.2099	-11.4098	-26.8001	1.26034	5.14226	-3.88192	-4.25612	-0.0521	-4.20402	3.1909	4.20888	-1.01798	-1.78553	1.77966	-3.56519	-0.543	2.69177	-3.23477	30.4062	39.4543	-9.04807	0.91411	6.58054	-5.66643	-2.51447	3.21145	-5.72592	-0.214	4.35183	-4.56583	4.3568	6.89262	-2.53582	-0.183	2.24052	-2.42352
1.1566	152.544			152.544	18.1481	26.0357	-7.88758	-1.6834	7.39246	-9.07586	-36.7266	-14.3932	-22.3334	-36.9635	-11.4356	-25.5279	1.84112	4.74241	-2.90129	-3.57294	0.2762	-3.84914	3.90901	4.4248	-0.51579	-1.7374	1.31462	-3.05202	-0.419	2.09043	-2.50943	32.908	40.087	-7.17903	1.15105	6.35759	-5.20654	-1.95147	3.21912	-5.17059	0.7773	4.58943	-3.81213	4.93431	6.47794	-1.54363	0.354245	2.65199	-2.29775
1.16691	162.848			162.848	17.4678	24.723	-7.25517	-0.23	7.27872	-7.50872	-35.0728	-14.1201	-20.9527	-36.3798	-11.7274	-24.6523	3.31705	5.16505	-1.848	-2.63722	0.0869506	-2.72417	4.7473	4.56128	0.18602	-1.33141	0.964791	-2.2962	0.787741	2.11345	-1.32571	33.7283	39.5054	-5.77713	2.73604	6.31947	-3.58343	-0.843	3.02297	-3.86597	2.10828	5.36433	-3.25605	4.74196	6.56432	-1.82236	0.630786	2.35884	-1.72805
1.17786	173.802			173.802	19.5947	25.2609	-5.66621	0.73298	7.54446	-6.81148	-35.093	-14.4714	-20.6216	-36.9481	-11.7876	-25.1604	2.93356	4.71063	-1.77707	-2.2656	-0.19	-2.0756	4.3116	4.27811	0.03349	-1.73916	0.895072	-2.63423	0.992865	1.92002	-0.927155	34.0913	39.0978	-5.0065	3.88971	6.51163	-2.62192	-1.6982	2.55281	-4.25101	1.61279	4.30593	-2.69314	5.8369	6.4612	-0.6243	0.976759	2.3206	-1.34384
1.1895	185.446			185.446	19.7297	24.5792	-4.84957	1.82402	7.6371	-5.81308	-33.1257	-13.7806	-19.3452	-35.8348	-11.6158	-24.219	4.15911	5.60448	-1.44537	-2.20816	0.172099	-2.38026	4.95017	4.41023	0.53994	-0.749	1.21705	-1.96605	1.69528	2.45273	-0.75745	36.1669	39.0728	-2.90586	3.30776	5.8105	-2.50274	0.342324	3.36609	-3.02377	2.34638	4.98509	-2.63871	4.9519	5.98201	-1.03011	1.27374	2.20625	-0.93251
1.20188	197.823			197.823	20.9913	25.3497	-4.35836	1.18543	6.82338	-5.63795	-33.1468	-14.0176	-19.1292	-36.2226	-12.6539	-23.5687	5.14687	5.83935	-0.69248	-2.57754	-0.362	-2.21554	5.8603	4.61881	1.24149	-0.889	1.26624	-2.15524	1.5048	2.35342	-0.84862	36.5221	38.9713	-2.44917	4.37791	6.16056	-1.78265	-0.0917	2.6826	-2.7743	3.93985	5.1435	-1.20365	5.33544	6.24007	-0.90463	1.30098	1.88254	-0.58156
1.21504	210.981			210.981	20.8467	24.8757	-4.029	2.63666	7.28753	-4.65087	-32.6342	-14.1347	-18.4995	-35.2517	-11.8572	-23.3946	5.32989	6.02223	-0.69234	-1.57566	-0.073	-1.50266	6.28912	4.81293	1.47619	-1.24709	0.212646	-1.45974	1.46124	1.99214	-0.5309	37.1269	39.3016	-2.17471	6.47802	6.45678	0.02124	0.617915	3.52655	-2.90863	3.48736	4.86697	-1.37961	5.23692	5.65151	-0.41459	1.23983	1.90837	-0.66854
1.22903	224.968			224.968	21.5136	24.0982	-2.58458	3.25418	7.13663	-3.88245	-32.2166	-14.2158	-18.0008	-35.0757	-11.8585	-23.2172	5.23228	5.51265	-0.28037	-1.08189	0.0363348	-1.11822	6.25614	4.73077	1.52537	-0.206	1.2547	-1.4607	1.50421	1.23327	0.27094	38.1274	39.2767	-1.1493	6.26714	6.44235	-0.17521	1.60608	2.77589	-1.16981	3.30365	4.64271	-1.33906	6.95408	6.45212	0.50196	2.00806	2.55823	-0.55017
1.24389	239.837			239.837	22.3068	24.1629	-1.8561	3.92416	6.5931	-2.66894	-31.7646	-13.924	-17.8405	-33.8968	-11.0658	-22.831	4.58305	5.34876	-0.76571	-1.30066	0.00232592	-1.30299	6.45992	4.6405	1.81942	-0.442	0.277579	-0.719579	1.35163	1.7191	-0.36747	38.8409	38.5713	0.26955	6.75116	6.0542	0.69696	1.57886	2.93829	-1.35943	3.25124	4.45456	-1.20332	7.02038	6.99866	0.02172	1.18126	2.20282	-1.02156
1.2597	255.643			255.643	23.529	24.7433	-1.21435	5.05474	6.72287	-1.66813	-31.3707	-14.4295	-16.9411	-34.3236	-12.4403	-21.8834	5.76969	5.42171	0.34798	-0.732	0.062322	-0.794322	6.25372	4.57628	1.67744	1.66737	1.35954	0.30783	2.59189	2.16131	0.43058	38.3702	37.7361	0.63408	6.44961	5.4328	1.01681	2.16257	2.6586	-0.49603	4.73136	5.0124	-0.28104	6.41526	6.23369	0.18157	1.62024	2.44817	-0.82793
1.2765	272.445			272.445	23.5195	24.8459	-1.32643	5.90676	6.93082	-1.02406	-31.6619	-13.9461	-17.7157	-34.0645	-11.5478	-22.5167	5.07438	5.12877	-0.05439	-0.754	0.00562484	-0.759625	5.74434	3.98383	1.76051	1.99422	1.50278	0.49144	2.60417	2.38896	0.21521	39.795	38.1864	1.60859	6.55375	5.56873	0.98502	1.4438	2.25667	-0.81287	3.93097	4.69252	-0.76155	7.06274	6.93547	0.12727	1.73346	1.73433	-0.00087
1.29436	290.305			290.305	25.0731	24.8146	0.25848	5.46333	7.48646	-2.02313	-31.1537	-14.1808	-16.9729	-34.3113	-12.5726	-21.7387	5.73279	4.55663	1.17616	-1.70935	-0.618	-1.09135	7.05124	4.82273	2.22851	0.597267	1.32165	-0.724383	3.01896	2.03666	0.9823	41.4937	38.3308	3.16297	7.75184	5.80403	1.94781	1.21916	2.45479	-1.23563	3.54788	4.45341	-0.90553	5.90811	5.6062	0.30191	2.5355	2.16431	0.37119
1.31335	309.292			309.292	23.6421	23.8493	-0.20718	5.76066	6.90673	-1.14607	-31.1353	-14.936	-16.1993	-34.837	-12.8752	-21.9618	5.96557	5.29021	0.67536	-0.71	-0.0813	-0.6287	7.64451	4.41827	3.22624	1.76493	1.4642	0.30073	2.01237	1.57122	0.44115	40.5083	38.6908	1.81751	7.49645	6.21556	1.28089	1.70248	2.07296	-0.37048	4.14963	4.85471	-0.70508	6.18163	6.02208	0.15955	1.91319	2.3282	-0.41501
1.33353	329.475			329.475	24.9016	24.7976	0.10405	6.91005	6.63662	0.27343	-31.1291	-14.5283	-16.6008	-34.6242	-12.5472	-22.077	6.36041	4.90598	1.45443	-0.704	0.109716	-0.813716	7.39114	5.08273	2.30841	0.396244	1.48199	-1.08575	3.02016	1.92598	1.09418	40.6412	38.3872	2.25402	8.78551	5.49181	3.2937	2.63921	2.51427	0.12494	4.10366	4.07751	0.02615	7.08766	6.38601	0.70165	2.96218	1.96865	0.99353
1.35499	350.93			350.93	24.843	23.6937	1.14932	6.24909	6.95389	-0.7048	-31.8213	-14.7272	-17.0941	-34.5605	-12.3778	-22.1828	6.3982	5.48642	0.91178	-1.55224	-0.304	-1.24824	7.04963	4.50769	2.54194	0.289404	0.857709	-0.568305	3.26415	2.20211	1.06204	40.9835	38.5312	2.45223	8.53047	5.71083	2.81964	3.33826	2.99592	0.34234	4.21407	4.29742	-0.08335	6.20718	6.27103	-0.06385	2.08704	1.61633	0.47071
1.3778	373.738			373.738	26.2415	24.4369	1.80459	6.42921	6.3443	0.08491	-30.4549	-13.9342	-16.5208	-32.9078	-12.0369	-20.8708	5.09472	4.89098	0.20374	-1.58935	-0.29	-1.29935	7.10908	4.78057	2.32851	1.14167	1.12573	0.01594	2.8835	1.71184	1.17166	42.1802	38.2071	3.97312	9.8558	6.62646	3.22934	2.19397	2.60996	-0.41599	4.92439	4.79571	0.12868	6.89421	6.24698	0.64723	1.8863	1.43767	0.44863
1.40204	397.982			397.982	24.7141	23.7429	0.97121	5.8578	6.01422	-0.15642	-30.4213	-14.322	-16.0992	-33.7904	-12.0152	-21.7752	5.88795	4.94554	0.94241	-0.279	0.148975	-0.427975	7.57221	4.15697	3.41524	0.511677	0.702512	-0.190835	2.20965	1.18882	1.02083	42.3975	38.4096	3.98791	8.23498	5.54942	2.68556	2.75116	2.59634	0.15482	4.54658	4.25758	0.289	6.7337	5.55201	1.18169	2.18403	2.3658	-0.18177
1.42781	423.755			423.755	25.1066	23.8732	1.23343	7.14855	7.10571	0.04284	-30.7393	-14.5092	-16.2302	-33.77	-11.8521	-21.9178	6.68769	5.73228	0.95541	-0.808	-0.248	-0.56	7.47097	4.29282	3.17815	1.3665	1.73159	-0.36509	1.81025	1.46568	0.34457	42.0365	38.2484	3.78811	9.75366	6.3727	3.38096	2.2955	3.04454	-0.74904	4.75585	4.40115	0.3547	6.38385	6.02762	0.35623	2.69838	2.61093	0.08745
1.45521	451.152			451.152	24.7518	23.6611	1.09071	6.04298	6.23648	-0.1935	-31.6978	-14.9086	-16.7892	-33.4984	-12.2052	-21.2933	5.7266	5.52732	0.19928	0.262889	0.180714	0.0821753	7.18705	4.51237	2.67468	1.5889	1.25651	0.33239	2.6138	1.50039	1.11341	42.4726	37.7718	4.70084	9.31073	6.03217	3.27856	2.76231	2.36815	0.39416	3.76509	4.49877	-0.73368	6.46696	5.38818	1.07878	3.32351	2.55525	0.76826
1.48433	480.276			480.276	25.8331	24.5119	1.32117	7.26455	6.84058	0.42397	-30.8249	-14.8194	-16.0055	-32.7511	-12.1013	-20.6498	6.05194	5.23796	0.81398	-1.54787	-0.542	-1.00587	6.72371	4.53668	2.18703	1.51811	1.18751	0.3306	2.60914	1.35809	1.25105	42.9836	38.0316	4.95201	9.41645	6.22859	3.18786	2.67591	3.07638	-0.40047	4.58162	5.11545	-0.53383	7.14163	6.34833	0.7933	2.5587	2.28459	0.27411
1.51529	511.236			511.236	26.9377	24.9679	1.96972	7.13158	6.65101	0.48057	-30.1067	-13.9983	-16.1084	-34.0086	-12.1066	-21.902	6.7257	5.22244	1.50326	-0.834	-0.251	-0.583	6.90758	4.94311	1.96447	0.759413	0.404277	0.355136	4.02504	2.42781	1.59723	41.9814	37.8782	4.10325	8.19374	5.55123	2.64251	2.4881	3.12445	-0.63635	3.98114	4.00968	-0.02854	6.44532	5.9655	0.47982	1.3888	1.42863	-0.03983
1.5482	544.147			544.147	26.1814	24.4465	1.73497	6.71626	7.15161	-0.43535	-31.2812	-14.9371	-16.344	-34.4517	-12.8601	-21.5916	5.81425	4.87986	0.93439	-0.688	-0.177	-0.511	7.58338	4.74486	2.83852	1.48046	1.03395	0.44651	2.20562	1.74785	0.45777	42.1809	37.6345	4.54641	8.50072	5.81658	2.68414	2.46953	2.4867	-0.01717	4.39092	4.51352	-0.1226	5.36339	5.21791	0.14548	3.01143	1.93676	1.07467
1.58319	579.131			579.131	26.4564	23.874	2.58242	6.58985	6.74271	-0.15286	-30.5473	-14.2095	-16.3378	-33.8418	-11.7619	-22.0799	7.29379	5.58562	1.70817	1.11478	0.80895	0.30583	6.76028	3.96831	2.79197	1.43915	1.10016	0.33899	2.10946	1.80602	0.30344	42.4129	38.1372	4.27568	9.84354	6.09401	3.74953	2.64671	2.58942	0.05729	4.58791	4.70781	-0.1199	6.44197	5.622	0.81997	3.46452	2.32663	1.13789
1.62038	616.321			616.321	26.3821	23.9038	2.47833	7.18189	6.71491	0.46698	-30.3943	-14.4807	-15.9136	-33.939	-12.358	-21.581	6.20643	4.7561	1.45033	-3.90314	-2.32918	-1.57396	7.24216	4.59052	2.65164	1.5945	1.57118	0.02332	3.34934	2.26241	1.08693	41.742	37.4149	4.32712	8.93026	6.1313	2.79896	2.39203	2.28081	0.11122	4.17998	4.08828	0.0917	6.10848	6.21978	-0.1113	3.20336	2.76334	0.44002
1.65991	655.855			655.855	26.3489	23.9017	2.44722	8.03053	6.84827	1.18226	-31.1903	-15.1517	-16.0386	-33.2178	-12.5329	-20.6849	5.92373	4.59279	1.33094	0.0534233	0.0467009	0.0067224	7.81298	5.44814	2.36484	0.3843	0.926859	-0.542559	2.87022	1.88507	0.98515	40.9857	36.8355	4.15018	8.39344	5.01767	3.37577	2.97619	2.6816	0.29459	5.03458	5.06969	-0.03511	7.31263	6.66367	0.64896	2.05865	1.6677	0.39095
1.70194	697.88			697.88	25.2442	23.1689	2.07533	7.34692	6.65572	0.6912	-31.1479	-15.0327	-16.1152	-34.1467	-12.1704	-21.9763	6.84006	5.36178	1.47828	1.6999	0.451282	1.24862	7.54398	5.16411	2.37987	1.33308	1.78308	-0.45	3.00505	2.43764	0.56741	41.9117	36.5235	5.38818	10.1446	5.63562	4.509	3.25051	3.45825	-0.20774	3.29991	3.62593	-0.32602	5.64841	5.71703	-0.06862	2.22495	1.97197	0.25298
1.74661	742.554			742.554	25.2532	23.5634	1.68973	6.6889	6.31614	0.37276	-31.1258	-14.4675	-16.6583	-33.004	-12.0143	-20.9896	5.7107	4.46908	1.24162	-0.542	-0.138	-0.404	7.06022	4.46315	2.59707	2.01516	1.54876	0.4664	3.67643	2.21165	1.46478	40.5849	36.2256	4.3593	8.96853	5.71041	3.25812	2.84721	3.07792	-0.23071	3.43891	4.46897	-1.03006	6.70921	5.78674	0.92247	2.27594	1.9884	0.28754
1.7941	790.044			790.044	24.7197	23.3328	1.38685	7.87866	6.54596	1.3327	-31.5543	-14.6867	-16.8676	-34.1602	-12.234	-21.9262	6.34522	4.86687	1.47835	0.210976	0.24491	-0.033934	7.96049	5.15716	2.80333	0.770785	0.939099	-0.168315	3.37315	1.89708	1.47607	42.0963	37.4813	4.61505	9.26101	5.85272	3.40829	1.19637	1.77258	-0.57621	5.36436	5.08193	0.28243	6.86148	6.07272	0.78876	1.28281	1.11897	0.16384
1.84458	840.526			840.526	26.3201	23.506	2.81411	6.90834	6.12987	0.77847	-30.2452	-14.2508	-15.9944	-34.1142	-12.957	-21.1571	6.39846	5.31493	1.08353	-0.355	-0.317	-0.038	7.77439	5.34742	2.42697	0.241499	0.804901	-0.563402	2.98158	2.22205	0.75953	41.8043	36.9492	4.85512	9.24718	6.30975	2.93743	2.07106	2.64622	-0.57516	4.08511	4.60916	-0.52405	6.79191	6.16138	0.63053	1.24101	0.655298	0.585712
1.89825	894.191			894.191	25.9383	23.4021	2.53616	7.79166	6.57477	1.21689	-30.4346	-14.6455	-15.7891	-33.9758	-12.319	-21.6568	6.32035	5.54446	0.77589	-0.434	-0.0718	-0.3622	7.06348	4.64288	2.4206	1.12926	1.34317	-0.21391	3.49585	1.44319	2.05266	40.3303	36.3538	3.97656	9.3575	6.49495	2.86255	2.07287	2.69322	-0.62035	3.71612	4.15452	-0.4384	6.95644	5.74325	1.21319	1.82423	2.04831	-0.22408
1.9553	951.237			951.237	25.7867	23.5534	2.23332	7.29556	6.83625	0.45931	-31.8248	-14.6573	-17.1675	-34.604	-12.9105	-21.6935	6.45405	4.94601	1.50804	-0.753	0.00592503	-0.758925	7.3738	4.62823	2.74557	0.632814	1.38971	-0.756896	3.58612	2.1552	1.43092	40.9842	36.5833	4.40083	8.85557	5.67373	3.18184	1.60364	3.00623	-1.40259	4.85169	4.4614	0.39029	6.16814	5.7177	0.45044	1.8893	2.36337	-0.47407
2.01594	1011.88			1011.88	25.6998	23.1825	2.51734	7.6863	6.82653	0.85977	-30.5512	-14.4338	-16.1174	-34.1193	-13.0236	-21.0956	6.27895	5.27091	1.00804	-1.08905	-0.407	-0.68205	6.62123	4.5379	2.08333	1.35442	1.13139	0.22303	2.94461	2.18974	0.75487	41.3683	36.8551	4.5132	9.89929	5.89319	4.0061	2.75593	2.84268	-0.08675	5.28536	5.50634	-0.22098	5.91331	5.23522	0.67809	2.34914	2.32812	0.02102
2.0804	1076.34			1076.34	24.5421	23.1655	1.37662	7.5236	5.92716	1.59644	-30.5709	-14.8215	-15.7494	-33.7426	-12.4635	-21.2791	6.53165	5.27872	1.25293	-1.0207	-0.474	-0.5467	6.4426	4.47157	1.97103	1.22571	1.88465	-0.65894	2.08386	1.4786	0.60526	41.3356	36.9187	4.41685	9.61602	5.76446	3.85156	1.61977	2.25811	-0.63834	3.73758	4.10556	-0.36798	5.757	5.27668	0.48032	2.55989	1.94707	0.61282
2.14893	1144.87			1144.87	24.4731	23.061	1.41209	6.82922	6.75735	0.07187	-31.7885	-14.8734	-16.9151	-34.3967	-12.9209	-21.4758	5.2294	4.10232	1.12708	-0.312	-0.151	-0.161	6.93612	4.74645	2.18967	1.21052	1.54681	-0.33629	3.21776	2.5337	0.68406	39.4536	36.2536	3.19996	8.13569	5.18912	2.94657	1.80021	2.35612	-0.55591	4.24072	4.01542	0.2253	6.18244	6.28001	-0.09757	1.72168	1.95654	-0.23486
2.22177	1217.71			1217.71	25.6381	23.7718	1.86638	7.53601	6.78497	0.75104	-30.3814	-14.9817	-15.3998	-34.2351	-12.2605	-21.9746	6.74242	5.14072	1.6017	-0.923	-0.304	-0.619	6.33619	4.62609	1.7101	0.0864084	1.04908	-0.962672	3.02339	2.34503	0.67836	39.7259	35.6045	4.12141	8.96862	5.71047	3.25815	2.41625	2.03431	0.38194	3.46753	4.06615	-0.59862	6.53691	5.61229	0.92462	1.76655	1.61159	0.15496
2.29921	1295.15			1295.15	24.9926	23.2378	1.75478	7.10363	6.21881	0.88482	-30.9982	-14.5192	-16.479	-33.7815	-11.9312	-21.8503	7.23552	5.47427	1.76125	-0.614	-0.247	-0.367	7.25594	4.79896	2.45698	1.18744	2.05721	-0.86977	2.47176	1.4287	1.04306	39.0268	35.1416	3.88519	9.23284	6.18939	3.04345	2.82351	2.72209	0.10142	4.11584	3.94666	0.16918	6.90275	6.17713	0.72562	2.11679	1.99329	0.1235
2.38153	1377.47			1377.47	24.5677	22.2489	2.3188	6.06971	5.97909	0.09062	-31.1965	-14.7425	-16.454	-33.884	-12.5629	-21.3211	6.15607	5.741	0.41507	-0.503	0.252618	-0.755618	6.79972	4.83054	1.96918	0.905231	1.32156	-0.416329	3.10029	2.25122	0.84907	39.543	35.1479	4.39508	8.21516	6.03747	2.17769	2.69581	2.79536	-0.09955	4.19023	4.15435	0.03588	5.97448	5.66368	0.3108	2.13795	2.20691	-0.06896
2.46903	1464.97			1464.97	24.0193	22.3056	1.71367	6.03817	5.44088	0.59729	-31.3557	-14.8264	-16.5293	-34.7978	-12.7896	-22.0082	6.48591	4.98518	1.50073	0.0238202	0.245321	-0.2215	5.68485	4.24711	1.43774	1.75609	1.60883	0.14726	2.86035	2.5028	0.35755	39.7537	35.3552	4.3985	8.75739	6.16114	2.59625	2.57237	2.58961	-0.01724	4.52008	4.74618	-0.2261	6.31865	5.27409	1.04456	1.67431	1.79461	-0.1203
2.56205	1557.99			1557.99	24.2455	22.9773	1.26817	7.49854	6.48563	1.01291	-30.7951	-14.7235	-16.0716	-35.1898	-13.0574	-22.1324	6.696	5.72997	0.96603	-0.169	0.0826679	-0.251668	7.42179	5.46479	1.957	1.74141	1.87257	-0.13116	2.70093	1.57336	1.12757	39.5851	35.0562	4.52899	9.36277	6.03965	3.32312	1.7695	2.23521	-0.46571	3.06834	3.39132	-0.32298	5.77267	5.56314	0.20953	2.2457	1.98536	0.26034
2.66093	1656.88			1656.88	24.3066	22.3867	1.91998	7.04185	6.9372	0.10465	-31.3104	-14.9405	-16.3699	-35.1446	-13.2427	-21.9019	5.71667	5.29832	0.41835	0.0985865	-0.365	0.463587	7.37763	4.90295	2.47468	0.536878	1.12196	-0.585082	3.39205	2.02238	1.36967	39.4826	34.7171	4.76554	8.9374	6.09625	2.84115	2.5433	2.76253	-0.21923	4.33945	4.687	-0.34755	6.1558	6.14896	0.00684	2.1331	2.36922	-0.23612
2.76605	1761.99			1761.99	24.3625	22.0986	2.26384	6.73538	5.73269	1.00269	-31.97	-15.0339	-16.9362	-34.5114	-13.0338	-21.4775	5.07139	4.69343	0.37796	-1.06232	-0.218	-0.84432	7.1053	5.0268	2.0785	0.00644158	0.544857	-0.538416	2.75166	1.51803	1.23363	39.1467	34.592	4.55468	8.23975	5.57148	2.66827	2.52985	2.29167	0.23818	4.34475	3.89004	0.45471	6.16037	5.9091	0.25127	2.80789	2.28254	0.52535
2.87779	1873.73			1873.73	23.9488	22.1214	1.82739	6.42465	6.31231	0.11234	-30.8199	-14.9898	-15.83	-35.5586	-13.4352	-22.1233	6.10757	5.82201	0.28556	-0.45	0.140179	-0.590179	6.1932	4.92509	1.26811	0.808195	1.12118	-0.312985	3.23839	2.44934	0.78905	38.5322	34.0956	4.43665	8.78415	6.06358	2.72057	2.73805	2.70098	0.03707	4.03447	4.23191	-0.19744	6.3328	5.77375	0.55905	2.04312	1.96266	0.08046
2.99657	1992.51			1992.51	23.0267	21.4687	1.558	7.18726	6.52269	0.66457	-31.1829	-14.7868	-16.3961	-34.7514	-12.7331	-22.0184	6.55839	5.30616	1.25223	0.499882	0.068895	0.430987	6.41677	5.29031	1.12646	1.58685	1.95686	-0.37001	3.13848	2.09461	1.04387	37.8102	33.3791	4.43104	8.82721	6.07085	2.75636	1.55007	2.20197	-0.6519	3.5434	3.99013	-0.44673	5.78216	5.39373	0.38843	2.26181	3.03754	-0.77573
3.12284	2118.78			2118.78	23.3592	21.3043	2.05484	6.64775	6.56539	0.08236	-31.7536	-15.1382	-16.6153	-35.7726	-13.291	-22.4816	6.13574	5.0954	1.04034	-0.737	-0.0309	-0.7061	7.06545	5.11126	1.95419	0.875602	1.63371	-0.758108	3.24441	1.87482	1.36959	37.5812	33.1153	4.46583	7.45167	4.7186	2.73307	1.83846	2.64638	-0.80792	4.05819	4.15992	-0.10173	6.52238	6.03363	0.48875	2.54654	2.43941	0.10713
3.25707	2253.01			2253.01	23.1438	22.0517	1.09212	6.21131	5.98806	0.22325	-31.5497	-15.5064	-16.0433	-34.9212	-12.7338	-22.1874	5.23287	4.89827	0.3346	0.088125	0.413201	-0.325076	6.92471	5.33265	1.59206	0.973647	1.49872	-0.525073	2.75279	1.02327	1.72952	37.8892	32.6362	5.25306	8.65856	6.01511	2.64345	2.81546	2.30093	0.51453	4.38953	4.61579	-0.22626	5.92708	5.83689	0.09019	2.33856	2.12462	0.21394
3.39975	2395.69			2395.69	22.3608	20.8757	1.48512	5.36897	5.44734	-0.07837	-22.2374	-12.3891	-9.84828	-36.1947	-13.7298	-22.4649	6.302	5.08944	1.21256	-0.204	0.0540749	-0.258075	6.97253	5.36496	1.60757	1.12881	1.5689	-0.44009	2.20844	1.79645	0.41199	35.5825	31.9068	3.67564	8.94965	6.12389	2.82576	2.54832	2.69525	-0.14693	4.05851	4.41996	-0.36145	5.90507	5.93206	-0.02699	2.63266	2.39454	0.23812
3.55143	2547.37			2547.37	22.2078	21.3386	0.86915	6.40307	5.98089	0.42218	-12.2539	-7.14721	-5.10667	-36.1814	-13.5586	-22.6228	6.01238	5.29751	0.71487	-0.632	0.171142	-0.803142	6.21516	4.79928	1.41588	1.27187	1.24215	0.02972	1.58958	1.49893	0.09065	35.9549	32.2374	3.71748	8.27154	5.2231	3.04844	2.28849	2.62264	-0.33415	3.34186	4.05889	-0.71703	7.23562	5.75898	1.47664	1.79586	2.46766	-0.6718
3.71267	2708.61			2708.61	21.6863	20.4962	1.19013	6.67283	6.49275	0.18008	-8.29942	-4.03529	-4.26413	-36.3375	-13.8084	-22.5291	5.58816	5.39858	0.18958	0.612484	-0.13	0.742484	6.92121	5.24388	1.67733	0.471702	1.64753	-1.17583	3.07641	1.97582	1.10059	35.2423	31.2825	3.95975	7.78536	5.73447	2.05089	3.21993	3.57126	-0.35133	3.41879	3.51674	-0.09795	7.79754	6.65012	1.14742	2.7146	2.64746	0.06714
3.88407	2880.01			2880.01	21.9538	19.8398	2.11401	6.79293	6.31509	0.47784	-7.22079	-3.59448	-3.62631	-35.2673	-13.2649	-22.0024	5.8164	5.36018	0.45622	0.403549	0.414324	-0.010775	7.15947	5.40021	1.75926	1.83003	1.97606	-0.14603	2.16222	1.87347	0.28875	35.1906	31.2723	3.91833	8.08488	5.83598	2.2489	1.50412	2.14587	-0.64175	3.55509	3.61084	-0.05575	7.0161	5.97843	1.03767	1.74456	1.89055	-0.14599
4.06627	3062.21			3062.21	20.5043	20.301	0.20338	5.93367	5.50895	0.42472	-6.85851	-3.46746	-3.39105	-34.6919	-12.6395	-22.0523	5.93754	5.85524	0.0823	0.197486	0.327797	-0.130311	6.35911	5.34549	1.01362	0.508367	1.30848	-0.800113	2.55023	2.19659	0.35364	34.1311	30.2481	3.883	8.17963	5.56961	2.61002	3.07899	2.82881	0.25018	3.51128	3.89337	-0.38209	6.96482	5.73914	1.22568	2.54809	2.93286	-0.38477
4.25996	3255.9			3255.9	21.5693	20.3448	1.22455	5.69829	5.67248	0.02581	-6.22535	-2.99151	-3.23384	-35.3623	-13.7735	-21.5888	5.65973	5.03491	0.62482	0.235204	0.452668	-0.217463	7.40356	6.14798	1.25558	0.642961	1.26688	-0.623919	2.95094	1.46045	1.49049	33.7033	29.8141	3.88921	8.03058	5.97086	2.05972	2.77459	2.94707	-0.17248	3.04425	3.16201	-0.11776	5.91799	5.49776	0.42023	1.78698	2.28979	-0.50281
4.46585	3461.79			3461.79	21.4856	20.1589	1.32675	5.93729	4.92809	1.0092	-6.46516	-2.67743	-3.78773	-36.2471	-14.1919	-22.0551	5.94692	4.95434	0.99258	0.485399	0.371139	0.114261	7.68182	5.63645	2.04537	0.286245	1.22711	-0.940865	2.99813	1.69467	1.30346	32.9958	29.5549	3.44092	6.61922	4.80772	1.8115	1.41858	1.86519	-0.44661	3.58938	4.20559	-0.61621	6.11917	5.8623	0.25687	1.95096	2.29519	-0.34423
4.68472	3680.66			3680.66	20.592	19.4854	1.1066	7.0486	5.92307	1.12553	-6.85501	-3.34103	-3.51398	-35.1186	-13.4128	-21.7058	5.06184	5.02587	0.03597	1.27274	0.454494	0.818246	7.66029	5.48528	2.17501	1.03345	0.957347	0.0761025	3.52306	2.28244	1.24062	31.5407	28.2711	3.26958	7.89739	5.70403	2.19336	3.09048	2.9133	0.17718	3.54328	3.71304	-0.16976	6.79018	5.3201	1.47008	1.25617	2.00051	-0.74434
4.91738	3913.33			3913.33	20.3466	19.3049	1.04174	6.42612	6.13784	0.28828	-5.98795	-2.2794	-3.70855	-37.0392	-14.2807	-22.7585	5.51203	5.04878	0.46325	-0.437	0.0668915	-0.503892	7.10775	5.6625	1.44525	0.0280037	0.790212	-0.762209	2.35963	1.62116	0.73847	31.7923	28.3092	3.48311	8.20891	5.27923	2.92968	1.96459	1.60208	0.36251	4.40222	4.28297	0.11925	5.28103	4.68876	0.59227	1.26998	1.70706	-0.43708
5.16471	4160.65			4160.65	19.5491	18.3346	1.2145	6.05933	5.81162	0.24771	-6.24548	-3.12621	-3.11927	-36.8457	-14.5674	-22.2783	5.77641	5.20339	0.57302	0.377799	0.555431	-0.177632	7.34069	6.0489	1.29179	1.42039	1.41171	0.00868	2.25317	2.07815	0.17502	30.9081	27.18	3.72813	8.48285	5.82734	2.65551	1.90023	2.15192	-0.25169	3.14954	3.44465	-0.29511	6.59318	5.58829	1.00489	1.05599	1.562	-0.50601
5.42763	4423.57			4423.57	19.5094	18.3145	1.1949	5.89298	5.85695	0.03603	-6.70705	-3.09451	-3.61254	-35.7369	-14.2173	-21.5195	5.56017	5.38171	0.17846	0.298386	0.503104	-0.204717	7.53732	5.66721	1.87011	0.514663	0.860488	-0.345825	2.82583	2.10181	0.72402	30.2387	26.3968	3.84188	7.61498	5.76381	1.85117	3.02938	3.31533	-0.28595	3.82152	3.958	-0.13648	5.19598	4.76897	0.42701	1.67332	1.9027	-0.22938
5.70711	4703.06			4703.06	17.9557	16.9906	0.96511	6.50902	4.85159	1.65743	-6.10232	-3.23777	-2.86455	-36.0194	-14.6243	-21.3951	5.65199	5.32898	0.32301	1.12598	0.873084	0.252896	6.85554	5.3225	1.53304	0.615349	1.54323	-0.927881	3.39626	2.3385	1.05776	30.2283	26.7767	3.45158	8.10865	5.79495	2.3137	2.39632	2.46494	-0.06862	3.82112	4.01137	-0.19025	5.94566	5.89638	0.04928	2.86965	2.18151	0.68814
6.00421	5000.16			5000.16	18.0591	17.1821	0.87697	6.05994	5.18434	0.8756	-4.75821	-2.33031	-2.4279	-37.6518	-14.7014	-22.9505	5.88994	5.56248	0.32746	1.10368	0.677075	0.426605	6.65095	5.78613	0.86482	1.47528	2.02648	-0.5512	2.92804	1.26333	1.66471	28.9211	25.8224	3.0987	7.70199	5.45003	2.25196	3.17032	3.15466	0.01566	3.80243	3.83178	-0.02935	6.20474	5.04293	1.16181	2.58646	2.50986	0.0766
16.0544	15050.4			15050.4	3.99825	2.61252	1.38573	3.049	2.52404	0.52496	2.34101	2.1208	0.22021	1.80525	1.33298	0.47227	2.7813	2.25474	0.52656	2.38633	1.24967	1.13666	2.90985	2.34841	0.56144	2.8079	2.04025	0.76765	2.21285	2.39458	-0.18173	3.2678	3.2986	-0.0308	2.11846	1.75848	0.35998	2.57293	1.90089	0.67204	1.81114	1.72058	0.09056	1.91962	1.73076	0.18886	3.07843	1.94782	1.13061
16.1046	15100.6			15100.6	2.35502	2.45089	-0.09587	1.50864	1.35465	0.15399	1.7495	1.22796	0.52154	2.50807	2.09163	0.41644	2.54545	1.48378	1.06167	1.24105	0.734228	0.506822	1.49998	1.49569	0.00429	1.43909	1.81465	-0.37556	1.12567	1.06354	0.06213	3.39032	3.0285	0.36182	1.88732	1.46918	0.41814	1.31791	1.60286	-0.28495	1.87233	0.794389	1.07794	2.01714	2.37017	-0.35303	1.2904	1.40016	-0.10976
16.1548	15150.8			15150.8	1.96432	1.8259	0.13842	1.35577	1.19909	0.15668	0.432625	0.738322	-0.305697	1.45661	1.00045	0.45616	0.38375	0.62854	-0.24479	1.32158	0.596376	0.725204	1.74821	1.08925	0.65896	1.75854	1.05832	0.70022	0.605945	0.572453	0.0334914	2.1692	2.13177	0.03743	0.569925	1.00598	-0.436055	0.722247	0.0399338	0.682313	0.136269	0.508017	-0.371748	0.582091	0.579706	0.00238436	0.408721	0.812388	-0.403667
16.205	15201			15201	0.380359	1.01112	-0.630761	0.33518	0.337896	-0.0027165	1.34236	1.13994	0.20242	1.24812	0.883523	0.364597	0.535852	0.771425	-0.235573	0.253092	0.191731	0.0613611	0.634176	0.624672	0.00950339	0.90291	0.843858	0.0590519	0.367363	0.240294	0.127069	0.426585	0.39227	0.0343146	0.561662	1.01079	-0.449128	0.945867	1.09503	-0.149163	0.113001	0.451817	-0.338816	-0.221	0.337301	-0.558301	1.04698	0.989385	0.0575955
16.2552	15251.2			15251.2	1.348	0.507033	0.840967	-0.0862	0.342273	-0.428473	0.626849	1.05136	-0.424511	0.33857	0.14848	0.190089	0.661912	0.444975	0.216937	1.18789	0.592222	0.595668	0.171412	0.523294	-0.351882	0.978663	0.578676	0.399987	1.25042	1.02393	0.22649	1.84215	1.08268	0.75947	0.302093	0.524872	-0.222779	0.267026	0.0102428	0.256783	0.107301	0.712639	-0.605338	-0.657	-0.13	-0.527	1.13072	0.656324	0.474396
16.3054	15301.4			15301.4	-0.0368	0.0726645	-0.109464	0.232087	0.757041	-0.524954	0.0695738	0.335548	-0.265974	0.845174	0.290577	0.554596	0.268809	0.626653	-0.357844	0.385942	0.207364	0.178578	-0.828	-0.765	-0.063	-0.0415	0.12291	-0.16441	0.588668	0.273306	0.315362	0.94894	0.664265	0.284674	0.554375	0.637879	-0.0835041	0.929429	0.369867	0.559562	0.377937	0.0778584	0.300078	0.777142	0.616335	0.160807	0.665095	-0.148	0.813095
16.3556	15351.6			15351.6	0.653367	0.524119	0.129248	-0.442	0.164993	-0.606993	0.336209	0.342278	-0.00606897	-0.236	0.0898406	-0.325841	-0.353	-0.0162	-0.3368	0.134053	-0.138	0.272053	0.436416	0.274853	0.161563	-0.345	0.18559	-0.53059	0.00751202	-0.14	0.147512	-0.0716	0.378719	-0.450319	0.470364	0.0226839	0.44768	0.583502	0.373067	0.210435	0.127381	0.339064	-0.211683	0.0118454	0.304851	-0.293006	0.129715	-0.125	0.254715
16.4058	15401.8			15401.8	-0.151	0.307437	-0.458437	-0.0596	0.267797	-0.327397	-0.278	-0.332	0.054	-0.00231	0.0426242	-0.0449342	0.0146615	-0.339	0.353661	0.532345	0.231527	0.300818	0.513791	0.447622	0.0661688	-0.625	-0.696	0.071	-0.0252	-0.257	0.2318	0.360866	-0.0476	0.408466	-0.139	0.0697017	-0.208702	0.177546	0.573955	-0.396409	0.415816	0.129272	0.286543	0.159547	0.357525	-0.197978	0.348471	0.240672	0.107799
16.456	15452			15452	-0.378	-0.771	0.393	0.161828	0.0340664	0.127761	0.631828	-0.0368	0.668628	-1.07596	-0.647	-0.42896	-0.221	-0.554	0.333	-0.451	-0.304	-0.147	0.373174	0.373452	-0.000278159	-0.277	-0.275	-0.002	0.138433	-0.299	0.437433	0.141006	0.0435548	0.097451	-0.451	-0.354	-0.097	-0.506	-0.176	-0.33	0.0117071	0.249348	-0.237641	0.402464	0.231439	0.171025	-0.883	-0.597	-0.286
16.5062	15502.2			15502.2	-0.564	-0.35	-0.214	0.26494	-0.0784	0.34334	-0.0105	0.114799	-0.125299	-0.297	-0.219	-0.078	-0.831	-0.969	0.138	-0.217	-0.0577	-0.1593	-0.649	-0.414	-0.235	0.226722	0.10425	0.122472	-0.207	-0.125	-0.082	0.195385	0.0784583	0.116926	-0.456	-0.531	0.075	-0.00487	-0.213	0.20813	-0.737	-0.414	-0.323	-0.822	-0.579	-0.243	0.647423	0.472953	0.17447
16.5564	15552.4			15552.4	-0.103	-0.355	0.252	-0.429	-0.639	0.21	-0.427	-0.461	0.034	-1.48951	-0.654	-0.83551	-0.52	-0.603	0.083	-1.24322	-0.517	-0.72622	-0.5	-0.345	-0.155	0.0820796	-0.188	0.27008	-0.182	-0.15	-0.032	-0.597	-0.218	-0.379	-0.428	-0.376	-0.052	-0.157	0.292325	-0.449325	-0.692	-0.273	-0.419	-1.1369	-0.859	-0.2779	-0.498	-0.37	-0.128
16.6066	15602.6			15602.6	-0.427	-0.261	-0.166	0.646365	-0.0298	0.676165	-0.223	-0.131	-0.092	-0.174	-0.176	0.002	-0.957	-0.451	-0.506	-0.448	0.103974	-0.551974	0.164116	0.0430759	0.12104	-0.198	0.27741	-0.47541	-0.527	0.00848674	-0.535487	-1.04137	-0.924	-0.11737	-0.529	-0.296	-0.233	-0.706	0.0705959	-0.776596	-0.264	-0.436	0.172	0.0604063	-0.402	0.462406	-0.117	0.246398	-0.363398
16.6569	15652.8			15652.8	0.316864	-0.935	1.25186	-1.40923	-0.475	-0.93423	-1.55748	-0.804	-0.75348	-1.08459	-1.27263	0.18804	-1.12745	-0.158	-0.96945	-0.911	-0.25	-0.661	-0.857	-0.934	0.077	-0.624	-0.546	-0.078	-0.633	-0.194	-0.439	-0.474	-0.603	0.129	-0.0335	-0.141	0.1075	-0.785	-1.05363	0.26863	-0.164	0.170106	-0.334106	-0.817	-0.267	-0.55	-0.994	-0.6	-0.394
16.7071	15703			15703	-0.186	-0.108	-0.078	-0.307	-0.542	0.235	-0.386	-0.402	0.016	0.676549	0.26231	0.414239	-0.24	-0.0769	-0.1631	-0.222	-0.271	0.049	-1.17781	-1.15833	-0.01948	-0.197	-0.438	0.241	-0.823	-0.912	0.089	-1.74813	-1.41289	-0.33524	-0.274	-0.499	0.225	0.158506	-0.595	0.753506	-0.107	-0.592	0.485	-0.00954	-0.545	0.53546	-1.33469	-1.23662	-0.09807
16.7573	15753.2			15753.2	-1.20202	-1.14866	-0.05336	-0.339	-0.149	-0.19	-1.20834	-1.10448	-0.10386	-0.708	-0.304	-0.404	-0.00718	0.0939243	-0.101104	0.301545	0.0259291	0.275616	0.00499498	0.0525298	-0.0475348	-1.22198	-0.795	-0.42698	-0.275	-0.17	-0.105	-0.655	-0.614	-0.041	-0.0862	-0.493	0.4068	-1.06746	-0.489	-0.57846	-0.167	-0.191	0.024	-0.129	-0.462	0.333	-0.213	-0.595	0.382
16.8075	15803.4			15803.4	-0.43	-0.213	-0.217	0.204154	-0.92	1.12415	-0.363	-0.937	0.574	-0.679	-0.199	-0.48	-0.256	-0.404	0.148	0.0328886	-0.48	0.512889	0.0424191	-0.316	0.358419	-0.845	-0.919	0.074	0.248147	-0.169	0.417147	-1.46353	-1.56406	0.10053	-0.666	-0.812	0.146	-0.794	-0.303	-0.491	-0.431	-0.489	0.058	-0.153	-0.727	0.574	-1.01802	-0.723	-0.29502
16.8577	15853.6			15853.6	-1.84548	-1.15981	-0.68567	-0.645	-0.675	0.03	0.340363	0.00505509	0.335308	-0.0855	-0.256	0.1705	0.230655	-0.12	0.350655	-0.467	-0.195	-0.272	-1.02324	-0.823	-0.20024	-0.909	-0.572	-0.337	-0.777	-0.441	-0.336	-1.92932	-1.26903	-0.66029	-0.255	-0.571	0.316	-1.18868	-1.08711	-0.10157	-1.00361	-1.00669	0.00308	0.203548	-0.517	0.720548	-0.881	-0.474	-0.407
16.9079	15903.8			15903.8	-1.69405	-1.39871	-0.29534	-0.992	-0.948	-0.044	-1.07621	-0.748	-0.32821	-1.24108	-1.08181	-0.15927	-0.128	-0.357	0.229	-1.43119	-0.47	-0.96119	-0.553	-0.168	-0.385	-0.106	-0.557	0.451	-0.882	-0.326	-0.556	-1.49485	-1.14826	-0.34659	-1.02804	-0.667	-0.36104	0.106687	-0.511	0.617687	0.402729	-0.0319	0.434629	-0.268	-0.31	0.042	0.270096	0.0514722	0.218624
16.9581	15954			15954	-1.29174	-1.52014	0.2284	-0.273	-1.18262	0.90962	-0.192	-0.232	0.04	0.0649672	-0.605	0.669967	-0.0457	0.108303	-0.154003	-0.267	-0.308	0.041	-0.942	-1.6619	0.7199	0.384652	0.157233	0.227418	-0.518	-0.36	-0.158	-1.42507	-1.36297	-0.0621	-0.869	-0.843	-0.026	-1.34951	-0.705	-0.64451	0.0937453	0.0887734	0.00497185	-0.458	-0.334	-0.124	0.385067	0.274319	0.110748
17.0083	16004.2			16004.2	-0.711	-0.543	-0.168	-0.822	-0.768	-0.054	-0.668	-1.0499	0.3819	-0.709	-0.72	0.011	0.074293	-0.247	0.321293	-1.13432	-0.424	-0.71032	-0.52	-1.0277	0.5077	-0.738	-0.193	-0.545	0.00149255	-0.178	0.179493	-1.60441	-0.983	-0.62141	-1.59398	-0.987	-0.60698	-1.30019	-1.48379	0.1836	-0.524	-0.388	-0.136	0.210472	-0.1	0.310472	0.25649	0.211074	0.0454161
17.0091	16005.1			16005.1	-65.3861	-1.54017	-63.846	-65.5385	-0.718	-64.8205	-64.4124	-0.837	-63.5754	-63.9456	-0.877	-63.0686	-65.2244	-1.56617	-63.6582	-64.85	-0.24	-64.61	-61.6028	-0.949	-60.6538	-63.3482	-1.65577	-61.6925	-61.9628	-0.623	-61.3398	-65.0915	-2.02949	-63.062	-62.5264	-1.21041	-61.316	-62.0944	-1.30105	-60.7934	-61.1176	-0.942	-60.1756	-60.316	-1.47452	-58.8415	-59.5632	-1.04336	-58.5199
17.0099	16005.8			16005.8	-62.604	1.53525	-64.1393	-63.1158	1.63582	-64.7516	-61.7351	2.06502	-63.8002	-60.5732	1.84626	-62.4195	-60.8165	2.22651	-63.043	-61.7833	1.05566	-62.839	-59.9124	0.920816	-60.8332	-59.7217	1.58239	-61.304	-58.9369	1.86763	-60.8045	-62.8156	0.807552	-63.6232	-60.4317	1.46565	-61.8974	-58.4978	1.97016	-60.4679	-58.778	0.941242	-59.7192	-57.8486	0.665111	-58.5137	-56.2211	1.58926	-57.8104
17.0107	16006.6			16006.6	-62.6131	1.35476	-63.9678	-62.4761	1.35681	-63.8329	-61.4496	0.845715	-62.2953	-59.9445	1.52768	-61.4722	-58.8892	2.41857	-61.3078	-60.3023	1.34425	-61.6466	-57.7644	0.743152	-58.5076	-57.8322	1.42016	-59.2524	-57.8371	0.899065	-58.7362	-62.1482	0.790674	-62.9388	-59.628	1.60277	-61.2308	-57.0764	1.95624	-59.0327	-56.4244	2.09194	-58.5164	-56.3433	0.239329	-56.5827	-53.6998	1.70011	-55.3999
17.0115	16007.4			16007.4	-62.6025	1.61194	-64.2144	-61.5723	1.71122	-63.2836	-60.9175	1.19217	-62.1097	-58.6275	1.74507	-60.3726	-59.0593	1.27094	-60.3303	-59.0628	0.90064	-59.9635	-55.4023	1.23371	-56.636	-55.8631	1.44507	-57.3082	-55.3959	1.16563	-56.5616	-60.9511	1.42393	-62.375	-59.4287	1.44493	-60.8736	-57.8006	1.3466	-59.1472	-55.5818	2.00135	-57.5831	-53.7843	1.46154	-55.2458	-52.4437	1.50922	-53.9529
17.0124	16008.3			16008.3	-61.6369	1.09192	-62.7288	-61.6053	1.89668	-63.502	-58.2543	1.78937	-60.0436	-57.4952	1.52239	-59.0175	-56.8141	2.17261	-58.9867	-57.7162	0.685186	-58.4014	-54.7751	0.619193	-55.3943	-53.9191	1.58496	-55.504	-52.7552	1.55842	-54.3136	-61.263	0.66814	-61.9312	-58.5131	1.42994	-59.943	-55.8108	1.71629	-57.5271	-55.3711	1.22227	-56.5933	-51.9564	1.45087	-53.4073	-51.1632	1.53269	-52.6959
17.0134	16009.3			16009.3	-61.4827	0.299051	-61.7818	-60.5688	2.03614	-62.605	-57.8878	2.09035	-59.9781	-56.2221	2.02852	-58.2506	-55.9955	1.31085	-57.3064	-56.2974	0.422615	-56.72	-52.7708	0.733754	-53.5046	-51.7722	1.7383	-53.5105	-51.2949	1.16811	-52.4631	-59.2528	1.34357	-60.5964	-57.0735	1.91587	-58.9894	-54.8311	2.22854	-57.0596	-52.7684	1.82716	-54.5955	-50.0303	1.65491	-51.6852	-49.485	1.36205	-50.8471
17.0144	16010.3			16010.3	-59.5205	1.41204	-60.9326	-59.5852	2.41611	-62.0013	-56.8866	2.07372	-58.9603	-55.3778	1.70275	-57.0805	-53.7593	1.85433	-55.6136	-53.4648	0.927045	-54.3918	-49.8767	0.921522	-50.7982	-50.2409	1.95212	-52.193	-49.4629	1.10124	-50.5642	-58.9291	1.39763	-60.3267	-57.0876	1.02006	-58.1077	-53.3791	1.70314	-55.0822	-51.7664	1.41536	-53.1817	-48.9022	1.57114	-50.4733	-45.8464	2.60113	-48.4475
17.0154	16011.4			16011.4	-58.9904	1.7284	-60.7188	-59.5343	0.808913	-60.3433	-54.8935	2.00716	-56.9006	-53.3748	1.37525	-54.7501	-52.9762	1.19374	-54.1699	-51.5079	1.12184	-52.6297	-48.8966	0.117561	-49.0142	-47.2283	1.10414	-48.3324	-46.0547	1.42404	-47.4787	-58.9905	0.535131	-59.5256	-54.5336	2.41762	-56.9512	-52.7935	1.02675	-53.8202	-50.2333	1.55373	-51.787	-48.4068	0.533244	-48.9401	-45.6103	1.51315	-47.1235
17.0166	16012.5			16012.5	-58.7538	1.2802	-60.034	-57.1211	2.02674	-59.1479	-54.9354	0.982211	-55.9176	-53.3155	0.930627	-54.2461	-50.774	1.88944	-52.6634	-49.945	0.649123	-50.5941	-46.0413	1.50036	-47.5417	-45.3407	2.00321	-47.3439	-44.0177	1.60464	-45.6223	-58.0007	1.16376	-59.1644	-53.4614	2.75549	-56.2169	-52.3852	1.14986	-53.535	-48.0207	1.71332	-49.734	-44.9371	2.18672	-47.1238	-42.6599	2.62963	-45.2896
17.0178	16013.7			16013.7	-56.7524	1.80545	-58.5579	-55.8862	2.43919	-58.3254	-52.9594	1.96249	-54.9218	-50.7272	2.02225	-52.7495	-48.9562	1.90766	-50.8638	-46.7416	1.05714	-47.7987	-45.5119	0.808768	-46.3206	-44.8077	0.998107	-45.8058	-42.8236	1.11077	-43.9344	-57.6338	0.957257	-58.5911	-53.2686	1.60653	-54.8751	-49.196	2.54301	-51.739	-47.9989	1.59016	-49.5891	-43.2453	1.65313	-44.8985	-40.8099	2.42564	-43.2355
17.0191	16015			16015	-56.144	1.44786	-57.5919	-55.799	1.75624	-57.5553	-51.8766	1.52275	-53.3994	-48.4333	1.60232	-50.0356	-48.185	0.965819	-49.1508	-46.1072	0.898023	-47.0052	-43.0623	1.11314	-44.1754	-41.7924	1.85716	-43.6496	-40.248	1.82554	-42.0735	-55.2661	1.36547	-56.6315	-51.8136	1.85706	-53.6707	-48.3037	2.09418	-50.3979	-45.8349	2.1798	-48.0147	-41.554	1.86241	-43.4164	-39.4514	1.52532	-40.9768
17.0205	16016.4			16016.4	-55.5655	1.59016	-57.1557	-53.9468	1.59782	-55.5446	-49.8533	2.04312	-51.8964	-47.4526	2.2344	-49.687	-45.0853	1.94915	-47.0345	-43.1921	1.09035	-44.2825	-40.2393	0.990894	-41.2302	-40.2783	0.777097	-41.0554	-38.0176	1.56977	-39.5874	-54.2176	2.38115	-56.5987	-50.2277	1.73424	-51.9619	-47.2317	1.92149	-49.1532	-43.3097	2.12512	-45.4348	-39.9898	1.58393	-41.5737	-37.445	1.62256	-39.0676
17.0219	16017.9			16017.9	-54.8507	1.71442	-56.5652	-53.8841	1.28949	-55.1736	-49.4125	1.04761	-50.4601	-45.5035	1.54319	-47.0467	-45.0532	1.38834	-46.4415	-42.1403	0.690182	-42.8305	-38.2939	1.35454	-39.6485	-37.7114	1.61922	-39.3306	-36.781	1.10471	-37.8857	-54.4113	1.24944	-55.6608	-49.2077	2.51167	-51.7193	-45.9732	1.68284	-47.6561	-42.3817	2.01412	-44.3958	-38.4447	1.76969	-40.2144	-35.767	2.05491	-37.8219
17.0235	16019.4			16019.4	-53.9795	1.39661	-55.3761	-51.8334	2.32333	-54.1568	-45.8552	2.75867	-48.6138	-44.7848	0.859521	-45.6443	-41.9564	2.34658	-44.303	-39.4534	1.37301	-40.8264	-37.5989	0.699136	-38.2981	-35.8875	1.84382	-37.7313	-34.3802	1.08596	-35.4661	-52.4084	1.35995	-53.7683	-49.0298	1.37367	-50.4035	-44.8658	1.67108	-46.5369	-41.6564	1.25846	-42.9149	-36.355	1.44941	-37.8045	-34.8862	1.41242	-36.2987
17.0251	16021			16021	-52.1402	1.99097	-54.1312	-52.1511	1.56323	-53.7143	-46.4286	1.65867	-48.0873	-42.355	2.1991	-44.5541	-40.7894	1.5324	-42.3218	-38.8887	0.804089	-39.6928	-35.6051	0.297819	-35.9029	-34.1115	2.02881	-36.1403	-33.2085	1.04941	-34.2579	-53.3393	1.00511	-54.3444	-47.117	2.07984	-49.1968	-43.583	2.12359	-45.7066	-39.9123	1.70801	-41.6204	-35.0459	1.61603	-36.6619	-32.5547	2.08617	-34.6409
17.0269	16022.8			16022.8	-51.7338	2.00302	-53.7368	-49.4049	2.50517	-51.9101	-43.7096	2.66569	-46.3753	-40.1513	2.10165	-42.253	-38.5559	2.24228	-40.7981	-36.1126	1.22966	-37.3422	-33.1597	0.586541	-33.7462	-32.6316	0.98145	-33.6131	-31.0801	1.47779	-32.5579	-51.0821	1.60428	-52.6864	-46.6932	1.46049	-48.1537	-40.8119	1.55891	-42.3708	-38.0144	1.51995	-39.5343	-33.0962	1.18823	-34.2844	-30.1308	1.83739	-31.9682
17.0287	16024.7			16024.7	-50.1043	2.00911	-52.1134	-48.3691	2.71786	-51.087	-43.4386	2.02796	-45.4666	-39.1237	1.81298	-40.9367	-37.1572	0.900775	-38.058	-34.4746	1.19089	-35.6654	-32.4929	0.327783	-32.8207	-31.2373	0.899472	-32.1368	-28.3324	1.63451	-29.9669	-48.8546	2.10958	-50.9642	-44.8139	1.64426	-46.4582	-39.6275	1.82146	-41.449	-36.4842	1.61863	-38.1029	-32.301	1.24783	-33.5488	-29.0217	1.69437	-30.716
17.0307	16026.6			16026.6	-49.3268	1.79939	-51.1262	-47.6239	1.6901	-49.314	-41.1624	2.2148	-43.3772	-37.3836	1.96454	-39.3481	-35.8848	0.727328	-36.6121	-31.8792	1.05794	-32.9371	-29.296	1.01155	-30.3075	-28.3277	1.75704	-30.0847	-26.9376	1.31197	-28.2496	-48.4051	1.59313	-49.9982	-44.3037	0.981918	-45.2857	-39.0336	2.05376	-41.0873	-34.4265	1.78958	-36.216	-30.3506	0.88928	-31.2399	-27.2692	1.31533	-28.5846
17.0328	16028.7			16028.7	-47.4032	1.75684	-49.16	-45.5782	1.81525	-47.3934	-39.3198	1.65088	-40.9707	-36.5386	0.984622	-37.5233	-32.304	1.80466	-34.1087	-29.8706	1.25148	-31.1221	-28.0414	0.990501	-29.0319	-26.5989	1.31308	-27.912	-25.7921	0.814042	-26.6061	-47.1689	1.76875	-48.9377	-42.1544	1.70369	-43.8581	-36.7413	1.79771	-38.539	-33.3771	1.53778	-34.9148	-29.3224	0.581961	-29.9044	-25.4995	1.4642	-26.9637
17.035	16031			16031	-46.7099	1.94529	-48.6552	-44.4071	2.0043	-46.4114	-38.6618	0.910316	-39.5721	-33.9259	1.28057	-35.2065	-31.406	1.56245	-32.9685	-29.6175	0.796459	-30.414	-27.1486	0.596616	-27.7452	-26.2051	0.549357	-26.7544	-23.9843	0.937842	-24.9221	-46.8936	1.21633	-48.1099	-41.4259	1.24139	-42.6673	-36.0026	0.872695	-36.8753	-31.2903	1.84506	-33.1353	-27.626	0.812365	-28.4383	-24.7049	1.37759	-26.0825
17.0374	16033.4			16033.4	-45.249	1.9335	-47.1825	-42.5704	2.44331	-45.0137	-35.8666	1.64798	-37.5146	-32.3156	1.72579	-34.0414	-29.8376	0.980126	-30.8177	-28.1136	0.952616	-29.0663	-24.1521	1.19764	-25.3497	-23.938	1.5569	-25.4949	-22.3668	1.09778	-23.4646	-45.6188	1.29246	-46.9113	-39.4004	1.32073	-40.7212	-33.0789	1.7152	-34.7941	-30.0614	1.26698	-31.3284	-26.1664	0.0584353	-26.2248	-23.1024	0.881367	-23.9838
17.0399	16035.9			16035.9	-44.7009	2.14179	-46.8427	-41.7152	1.29892	-43.0142	-34.5944	1.58319	-36.1776	-30.5797	1.31107	-31.8908	-27.6254	1.83634	-29.4617	-26.8594	0.304108	-27.1635	-23.6211	0.67447	-24.2955	-22.7372	0.584822	-23.3221	-21.2868	1.46103	-22.7478	-43.8098	1.10966	-44.9195	-38.4487	1.74077	-40.1895	-32.1954	1.5839	-33.7793	-28.2059	1.51466	-29.7205	-23.4956	1.23466	-24.7303	-21.0459	1.00358	-22.0495
17.0426	16038.6			16038.6	-43.0803	1.11726	-44.1976	-41.6017	0.947119	-42.5488	-33.2449	1.72631	-34.9712	-28.8245	1.54034	-30.3648	-25.8277	0.985793	-26.8135	-24.6229	0.639664	-25.2626	-21.7727	0.599493	-22.3722	-20.7579	0.643866	-21.4018	-19.6935	1.02194	-20.7155	-42.8261	1.28397	-44.1101	-36.6213	1.76422	-38.3855	-30.3818	1.13422	-31.516	-27.4847	1.16091	-28.6456	-22.0568	0.798533	-22.8554	-20.1023	1.48379	-21.5861
17.0455	16041.4			16041.4	-41.0134	2.73274	-43.7461	-38.8495	1.6293	-40.4788	-31.2197	1.86822	-33.0879	-26.5884	1.93236	-28.5207	-24.6765	1.36622	-26.0427	-22.3343	0.744092	-23.0784	-20.5339	0.436764	-20.9707	-18.8525	1.19391	-20.0464	-17.8011	0.82715	-18.6283	-42.1355	0.825384	-42.9609	-36.1696	0.816218	-36.9859	-28.4048	1.45339	-29.8582	-25.5974	1.42981	-27.0272	-20.4388	1.18851	-21.6274	-18.3964	1.38754	-19.7839
17.0485	16044.5			16044.5	-41.511	1.44302	-42.954	-37.2417	1.86735	-39.1091	-30.0801	1.64888	-31.7289	-26.7224	0.608191	-27.3306	-23.1758	0.812493	-23.9883	-21.7797	0.474613	-22.2543	-18.8354	0.157883	-18.9933	-19.0953	0.377264	-19.4726	-18.1458	0.458827	-18.6046	-40.652	0.793734	-41.4458	-34.208	0.986849	-35.1948	-27.1188	1.03057	-28.1493	-23.7055	1.04955	-24.7551	-19.5909	0.414816	-20.0058	-17.566	0.724555	-18.2906
17.0517	16047.7			16047.7	-39.1232	1.05348	-40.1767	-35.1338	1.20215	-36.336	-29.2106	1.02269	-30.2332	-23.8681	0.895314	-24.7634	-21.4576	1.36052	-22.8181	-19.78	0.406199	-20.1862	-18.3067	-0.00725	-18.2995	-17.0101	1.21107	-18.2212	-16.851	0.58565	-17.4367	-38.3757	1.39498	-39.7707	-33.0545	0.949499	-34.004	-25.196	1.6182	-26.8142	-22.569	1.06681	-23.6359	-17.6547	0.198194	-17.8528	-16.567	0.717368	-17.2844
17.0552	16051.1			16051.1	-38.4598	0.571673	-39.0315	-33.4865	1.4121	-34.8986	-26.3323	1.05477	-27.3871	-22.158	1.23684	-23.3949	-19.8094	0.911976	-20.7214	-17.8224	0.544962	-18.3674	-17.1358	-0.349	-16.7868	-15.7629	1.21834	-16.9812	-15.3991	0.452387	-15.8515	-37.9445	1.09041	-39.0349	-31.1033	1.00723	-32.1105	-23.3325	1.12307	-24.4555	-20.7451	0.928278	-21.6733	-16.49	-0.157	-16.333	-15.3415	0.330218	-15.6717
17.0588	16054.8			16054.8	-36.7748	0.78265	-37.5574	-32.3572	1.9473	-34.3045	-25.0701	0.776076	-25.8462	-20.2766	1.05516	-21.3317	-18.9378	0.989862	-19.9276	-17.1415	0.530766	-17.6723	-16.3452	0.0955961	-16.4408	-15.347	0.202423	-15.5494	-14.2668	-0.00881	-14.258	-36.2154	0.754746	-36.9702	-29.1857	1.0986	-30.2843	-23.2138	0.30242	-23.5162	-20.5297	0.0472983	-20.5769	-14.8447	0.848488	-15.6932	-14.3322	0.0911023	-14.4233
17.0627	16058.6			16058.6	-35.4047	1.24735	-36.652	-31.1955	1.15341	-32.3489	-23.3269	0.754285	-24.0811	-18.7313	1.20628	-19.9376	-17.3381	0.620124	-17.9583	-15.5479	0.504858	-16.0528	-14.099	-0.0672	-14.0318	-13.5108	1.11931	-14.6301	-13.4979	0.55219	-14.0501	-34.688	1.01894	-35.707	-27.3999	1.02111	-28.421	-20.7221	0.720473	-21.4426	-18.0801	1.01106	-19.0912	-14.1282	0.881637	-15.0098	-12.9134	0.0846376	-12.9981
17.0668	16062.8			16062.8	-32.7876	1.47118	-34.2588	-29.3825	1.90655	-31.2891	-21.1957	0.5133	-21.709	-18.057	0.748133	-18.8052	-15.4722	0.437087	-15.9093	-14.3957	0.413509	-14.8092	-12.9595	0.368869	-13.3284	-12.5647	0.147424	-12.7121	-11.2072	1.18213	-12.3893	-33.1348	0.551631	-33.6864	-25.4969	1.37952	-26.8764	-20.2215	0.446359	-20.6678	-16.6298	0.968643	-17.5985	-13.3486	-0.342	-13.0066	-11.4508	0.610411	-12.0612
17.0712	16067.1			16067.1	-31.2608	1.3252	-32.586	-27.3681	1.46158	-28.8297	-19.8505	0.610238	-20.4607	-16.2218	0.50118	-16.723	-15.3912	-0.119	-15.2722	-12.8865	0.446536	-13.333	-11.8291	-0.0656	-11.7635	-11.6424	0.744192	-12.3866	-10.2565	0.316645	-10.5732	-31.8025	0.346442	-32.149	-25.2163	-0.0027	-25.2136	-17.9089	0.797177	-18.7061	-16.1533	0.466428	-16.6197	-11.4933	0.63793	-12.1312	-9.91397	1.21079	-11.1248
17.0758	16071.8			16071.8	-30.3436	0.44716	-30.7908	-26.6045	0.617741	-27.2222	-18.522	0.720555	-19.2426	-15.7073	0.289607	-15.9969	-12.685	0.994809	-13.6798	-12.9434	0.37201	-13.3154	-10.8282	-0.00523	-10.823	-10.9013	0.552377	-11.4537	-10.2847	0.285322	-10.57	-29.8892	0.104586	-29.9937	-23.5445	1.00855	-24.5531	-16.362	1.20011	-17.5621	-14.2676	0.256387	-14.5239	-11.362	-0.214	-11.148	-10.1378	0.660654	-10.7985
17.0808	16076.7			16076.7	-28.3817	1.41805	-29.7997	-24.4883	0.836818	-25.3251	-17.587	0.571397	-18.1584	-13.4208	0.88918	-14.31	-12.3755	0.212191	-12.5877	-11.9934	-0.305	-11.6884	-11.4333	-1.09376	-10.3395	-10.0638	0.406826	-10.4707	-9.68232	0.645738	-10.3281	-29.4573	-0.109	-29.3483	-22.3871	0.231231	-22.6183	-14.9826	0.839822	-15.8224	-12.7701	0.921731	-13.6918	-9.45046	0.0151496	-9.46561	-8.3026	0.555867	-8.85847
17.0861	16082			16082	-27.89	0.0838194	-27.9738	-23.7283	0.162233	-23.8906	-15.5013	0.876909	-16.3782	-13.8423	-0.3	-13.5423	-11.0139	0.10519	-11.1191	-10.306	0.57945	-10.8855	-9.03568	-0.162	-8.87368	-9.41127	-0.144	-9.26727	-8.54765	0.888766	-9.43642	-26.5711	0.293547	-26.8647	-20.294	0.669956	-20.964	-13.6751	1.12506	-14.8002	-10.9488	0.341798	-11.2906	-8.48362	0.171483	-8.6551	-8.91939	-0.162	-8.75739
17.0916	16087.6			16087.6	-25.2167	0.670785	-25.8875	-21.3912	0.878515	-22.2698	-14.7343	0.38234	-15.1167	-11.9455	0.267192	-12.2127	-10.8802	-0.517	-10.3632	-8.88655	0.103368	-8.98992	-8.83876	-0.314	-8.52476	-8.39272	0.422338	-8.81506	-8.9106	-0.219	-8.6916	-25.311	0.389127	-25.7001	-19.4543	0.23705	-19.6914	-13.4596	0.521538	-13.9811	-10.223	0.686939	-10.9099	-8.35562	0.11097	-8.46659	-7.30898	-0.205	-7.10398
17.0976	16093.5			16093.5	-23.3908	0.600924	-23.9917	-20.1712	0.851052	-21.0222	-12.5655	0.673857	-13.2393	-10.2053	0.586751	-10.792	-9.61563	0.271645	-9.88727	-8.66102	0.0167	-8.67772	-7.73733	-0.428	-7.30933	-7.14736	0.543522	-7.69088	-6.50382	0.917806	-7.42163	-23.9028	0.181065	-24.0838	-16.7468	0.614062	-17.3609	-11.6689	0.335399	-12.0043	-8.8844	0.423491	-9.30789	-7.2747	-0.0725	-7.2022	-6.14683	0.501957	-6.64879
17.1039	16099.9			16099.9	-22.9479	0.824685	-23.7726	-19.0069	0.574121	-19.581	-11.5671	0.85477	-12.4218	-8.86975	0.715368	-9.58512	-8.83299	0.194801	-9.02779	-7.72658	0.130119	-7.8567	-7.80361	-0.831	-6.97261	-7.93277	-0.495	-7.43777	-6.53696	0.256426	-6.79339	-22.7735	-0.028	-22.7455	-15.523	-0.0604	-15.4626	-10.2801	0.0362077	-10.3163	-7.84837	0.67167	-8.52004	-7.28273	-0.207	-7.07573	-7.04252	-0.126	-6.91652
17.1106	16106.6			16106.6	-20.4961	0.680937	-21.1771	-16.3897	0.671829	-17.0615	-10.4247	0.706305	-11.131	-9.65626	-0.467	-9.18926	-8.52613	-0.707	-7.81913	-7.0081	-0.0276	-6.9805	-6.86536	-0.825	-6.04036	-5.93088	-0.391	-5.53988	-6.64609	0.168965	-6.81505	-21.1949	0.137278	-21.3322	-14.4557	0.128367	-14.584	-9.12948	0.0740353	-9.20352	-7.11837	1.03993	-8.1583	-5.21238	0.102382	-5.31476	-4.33011	0.196429	-4.52654
17.1178	16113.7			16113.7	-19.9425	-0.327	-19.6155	-15.7511	0.293182	-16.0443	-10.4091	-0.0734	-10.3357	-7.67773	0.269278	-7.94701	-6.84301	0.0234981	-6.86651	-5.93898	0.239023	-6.178	-5.64847	-0.676	-4.97247	-5.0476	0.351242	-5.39884	-5.06408	-0.348	-4.71608	-19.326	-0.361	-18.965	-13.5861	0.783457	-14.3696	-8.88488	-0.156	-8.72888	-7.33119	0.127485	-7.45867	-4.66644	0.35387	-5.02031	-4.72571	-0.142	-4.58371
17.1254	16121.3			16121.3	-17.8376	0.286711	-18.1243	-14.3516	0.509194	-14.8608	-8.97321	-0.26	-8.71321	-7.36691	-0.405	-6.96191	-5.82678	0.0912414	-5.91802	-5.33823	0.254157	-5.59239	-5.22329	-0.314	-4.90929	-4.45995	-0.142	-4.31795	-5.65919	-0.365	-5.29419	-17.7636	-0.102	-17.6616	-12.3377	-0.0399	-12.2978	-7.51176	0.66252	-8.17428	-5.15604	0.960998	-6.11704	-4.78242	-0.127	-4.65542	-4.35792	0.0849398	-4.44286
17.1334	16129.4			16129.4	-16.8195	0.0388414	-16.8583	-13.963	-0.0535	-13.9095	-7.24227	0.645733	-7.888	-5.14061	0.116162	-5.25677	-5.59824	0.099485	-5.69772	-4.4333	0.087383	-4.52068	-4.18716	-0.232	-3.95516	-3.88794	0.0162125	-3.90415	-4.08628	-0.0331	-4.05318	-16.0435	-0.245	-15.7985	-10.5824	-0.075	-10.5074	-6.65321	0.701562	-7.35477	-5.08995	0.0885581	-5.17851	-3.35498	-0.108	-3.24698	-4.06017	-0.292	-3.76817
17.142	16137.9			16137.9	-15.1676	-0.0437	-15.1239	-12.3428	0.0880732	-12.4309	-7.70565	-0.651	-7.05465	-5.03446	0.224765	-5.25923	-4.48904	0.445463	-4.9345	-4.89791	-0.0922	-4.80571	-3.49745	-0.75	-2.74745	-3.9052	0.284735	-4.18994	-3.69478	0.382363	-4.07714	-15.6462	-0.509	-15.1372	-9.71854	-0.157	-9.56154	-6.93219	-0.771	-6.16119	-5.23545	-0.516	-4.71945	-3.00767	0.254665	-3.26234	-3.56388	-0.159	-3.40488
17.1511	16147.1			16147.1	-14.0492	-0.814	-13.2352	-10.7716	-0.335	-10.4366	-6.37134	-0.312	-6.05934	-3.70572	0.12517	-3.83089	-4.29536	-0.187	-4.10836	-3.80747	0.0313852	-3.83886	-3.41587	-0.247	-3.16887	-2.56261	-0.0591	-2.50351	-2.92488	0.144689	-3.06957	-14.3413	-0.931	-13.4103	-8.84879	0.0330528	-8.88184	-5.10576	0.288234	-5.39399	-4.76891	-0.181	-4.58791	-2.29605	-0.0741	-2.22195	-2.15076	-0.267	-1.88376
17.1608	16156.8			16156.8	-12.1756	0.108791	-12.2844	-8.73686	0.250083	-8.98694	-4.68479	-0.153	-4.53179	-3.96179	-0.442	-3.51979	-2.90718	0.462211	-3.36939	-4.10752	-0.725	-3.38252	-2.44845	-0.364	-2.08445	-3.01728	0.346057	-3.36334	-2.2398	0.325334	-2.56513	-12.7881	-0.422	-12.3661	-8.28407	-0.92	-7.36407	-4.02439	-0.49	-3.53439	-2.90691	0.279095	-3.18601	-1.95843	-0.109	-1.84943	-2.8618	-1.02008	-1.84172
17.1711	16167.1			16167.1	-11.5778	-0.386	-11.1918	-8.41172	0.131219	-8.54294	-5.58705	-0.801	-4.78605	-3.2541	-0.397	-2.8571	-2.77851	-0.261	-2.51751	-1.96323	0.111384	-2.07461	-2.7757	-0.81	-1.9657	-2.74876	-0.285	-2.46376	-1.40645	0.607165	-2.01361	-12.0895	-1.15678	-10.9328	-7.51593	-0.357	-7.15893	-3.46308	-0.608	-2.85508	-2.0395	-0.339	-1.7005	-2.47875	-0.272	-2.20675	-1.75895	-0.61	-1.14895
17.1821	16178			16178	-9.92946	-0.49	-9.43946	-6.93092	0.297018	-7.22794	-3.44959	-0.262	-3.18759	-3.11748	-0.0407	-3.07678	-2.61923	-0.232	-2.38723	-1.83361	0.478799	-2.31241	-2.56853	-0.507	-2.06153	-1.89946	-0.209	-1.69046	-1.64968	-0.172	-1.47768	-11.4581	-1.08365	-10.3744	-6.77414	-0.876	-5.89814	-2.56649	-0.0725	-2.49399	-1.83484	0.456664	-2.2915	-0.737	-0.424	-0.313	-2.51306	-0.891	-1.62206
17.1937	16189.7			16189.7	-9.40262	-0.174	-9.22862	-5.43812	-0.133	-5.30512	-3.80153	-0.521	-3.28053	-2.37252	-0.174	-2.19852	-2.23908	-0.261	-1.97808	-1.30513	-0.0511	-1.25403	-2.67691	-1.0956	-1.58131	-1.40207	-0.352	-1.05007	-3.24679	-1.09402	-2.15277	-10.1255	-1.54921	-8.5763	-5.17926	-0.579	-4.60026	-3.37166	-0.908	-2.46366	-2.83526	-0.904	-1.93126	-2.43764	-0.893	-1.54464	-1.24511	-0.126	-1.11911
17.2061	16202			16202	-8.18169	-0.651	-7.53069	-6.1262	-0.772	-5.3542	-2.60599	-0.126	-2.47999	-3.08425	-0.807	-2.27725	-2.43667	-0.148	-2.28867	-1.553	-0.133	-1.42	-0.926	-0.626	-0.3	-1.85555	-0.207	-1.64855	-1.94279	-0.583	-1.35979	-8.63319	-0.733	-7.90019	-5.10339	-0.757	-4.34639	-1.47166	-0.0206	-1.45106	-2.30746	-0.496	-1.81146	-1.44026	-0.678	-0.76226	-1.369	-0.504	-0.865
17.2193	16215.2			16215.2	-7.43037	-0.598	-6.83237	-3.69602	0.0984113	-3.79443	-2.76732	-0.187	-2.58032	-2.59903	-0.796	-1.80303	-0.778	0.550665	-1.32867	-1.42439	-0.193	-1.23139	-1.58014	-1.01435	-0.56579	-1.34609	-0.208	-1.13809	-1.50375	-0.447	-1.05675	-8.68272	-2.20636	-6.47636	-3.3694	-0.785	-2.5844	-1.64503	0.218159	-1.86319	-0.62	0.0709206	-0.690921	-1.48208	-1.03253	-0.44955	-1.70988	-0.216	-1.49388
17.2332	16229.2			16229.2	-7.36055	-0.847	-6.51355	-3.2572	-0.272	-2.9852	-2.3102	-0.779	-1.5312	-1.18755	-0.392	-0.79555	-0.799	-0.0204	-0.7786	-2.3072	-0.874	-1.4332	-1.56654	-1.494	-0.07254	-2.26001	-0.409	-1.85101	-0.975	-0.412	-0.563	-6.85227	-0.65	-6.20227	-3.14256	-0.0709	-3.07166	-2.27243	-0.721	-1.55143	-1.0073	-0.06	-0.9473	-0.462	-0.528	0.066	-0.697	0.177246	-0.874246
17.2481	16244.1			16244.1	-5.39649	-0.778	-4.61849	-3.52049	0.00652432	-3.52701	-1.4677	0.136124	-1.60382	-0.859	-0.295	-0.564	-0.83	-0.755	-0.075	-1.16507	-0.14	-1.02507	-1.75509	-1.06181	-0.69328	-1.64051	-0.531	-1.10951	0.0866855	0.680576	-0.593891	-6.64105	-1.61049	-5.03056	-2.42078	0.0175727	-2.43835	-1.75705	-0.356	-1.40105	-1.32905	-0.147	-1.18205	-0.875	-1.08574	0.21074	-0.85	0.283147	-1.13315
17.2639	16259.9			16259.9	-4.76305	-0.705	-4.05805	-2.52874	-0.348	-2.18074	-1.39746	-0.407	-0.99046	-0.891	-0.588	-0.303	-1.51022	-0.612	-0.89822	-0.0631	-0.154	0.0909	-0.376	-0.656	0.28	-0.582	0.273415	-0.855415	-0.467	-0.266	-0.201	-5.68259	-1.29559	-4.387	-1.89288	-0.147	-1.74588	-0.493	-0.174	-0.319	-0.208	-0.0987	-0.1093	-0.609	-1.0535	0.4445	-0.785	-0.418	-0.367
17.2807	16276.7			16276.7	-4.09852	-1.1049	-2.99362	-2.00744	0.186507	-2.19395	-0.863	-0.0249	-0.8381	-0.104	-0.199	0.095	-0.184	-0.147	-0.037	-0.442	-0.102	-0.34	-1.99686	-1.55611	-0.44075	-1.45791	-0.869	-0.58891	0.380333	0.150864	0.229469	-5.39364	-1.42334	-3.9703	-2.39574	0.0125252	-2.40827	-1.41296	-0.515	-0.89796	0.380961	-0.277	0.657961	-0.835	-0.81	-0.025	0.449806	-0.0951	0.544906
17.2986	16294.5			16294.5	-3.50446	-0.925	-2.57946	-1.51574	0.208913	-1.72465	-0.8	-0.439	-0.361	-1.9948	-0.982	-1.0128	-0.367	-0.413	0.046	-0.626	-0.0729	-0.5531	-0.0227	-0.408	0.3853	0.0387217	-0.194	0.232722	0.118772	0.570286	-0.451514	-5.97381	-2.0998	-3.87401	-1.90942	-0.454	-1.45542	-1.5322	-1.30532	-0.22688	-0.341	-0.404	0.063	0.335591	-0.473	0.808591	-0.183	-0.549	0.366
17.3176	16313.5			16313.5	-3.6473	-1.2383	-2.409	-1.55865	-0.942	-0.61665	-1.13931	-1.19821	0.0589	0.539381	-0.418	0.957381	-0.392	0.0757361	-0.467736	0.0118545	0.0988971	-0.0870426	-0.828	-1.11601	0.28801	0.383629	-0.31	0.693629	0.798146	0.477376	0.32077	-4.65747	-2.11791	-2.53956	-2.15305	-1.06023	-1.09282	-0.102	-0.256	0.154	-0.862	-0.473	-0.389	0.561684	-0.295	0.856684	0.0411032	-0.43	0.471103
17.3377	16333.7			16333.7	-3.70225	-1.70831	-1.99394	-0.45	-0.0672	-0.3828	-0.876	-0.605	-0.271	0.0687355	-0.315	0.383736	-1.21662	-1.05934	-0.15728	-0.903	-0.405	-0.498	-0.436	-0.709	0.273	0.383615	0.303301	0.0803137	0.628022	0.309382	0.31864	-3.08166	-1.49976	-1.5819	-2.31123	-1.15852	-1.15271	-0.0869	-0.0741	-0.0128	0.825923	0.056968	0.768955	0.779515	0.0846085	0.694907	-0.322	-0.312	-0.01
17.3592	16355.1			16355.1	-3.93	-1.92002	-2.00998	-2.14057	-1.01186	-1.12871	-0.318	-0.18	-0.138	-0.87	-0.887	0.017	-0.591	-0.527	-0.064	-0.218	0.0624306	-0.280431	-1.08916	-1.99745	0.90829	0.826209	0.113566	0.712643	-0.349	-0.236	-0.113	-3.44239	-1.12435	-2.31804	-1.15245	-0.733	-0.41945	-0.227	-0.425	0.198	-0.0284	-0.304	0.2756	0.142878	-0.754	0.896878	0.491232	0.0194071	0.471825
17.382	16378			16378	-3.31538	-2.43801	-0.87737	-1.19458	-0.673	-0.52158	-0.39	-0.406	0.016	-0.969	-0.617	-0.352	0.431843	-0.134	0.565843	-0.362	-0.328	-0.034	-1.36925	-1.78654	0.41729	-0.336	-0.481	0.145	0.306694	0.370391	-0.0636973	-4.51079	-2.39451	-2.11628	-0.506	-0.474	-0.032	-0.2	-0.798	0.598	0.135649	0.00320478	0.132444	-0.406	-1.1267	0.7207	0.612863	-0.273	0.885863
17.4063	16402.2			16402.2	-2.12703	-1.35462	-0.77241	-0.345	-0.368	0.023	-0.606	-0.65	0.044	0.167101	-0.213	0.380101	-0.169	-0.648	0.479	0.125122	-0.252	0.377122	-0.212	-1.97415	1.76215	0.551146	0.187447	0.363699	-0.391	0.114272	-0.505272	-3.33868	-2.33753	-1.00115	-0.385	-1.01916	0.63416	-0.99	-0.77	-0.22	0.857934	-0.373	1.23093	0.732413	-0.906	1.63841	0.815488	0.0347248	0.780763
17.432	16428			16428	-2.1897	-1.72432	-0.46538	-1.04483	-1.0112	-0.03363	-0.823	-0.702	-0.121	-0.903	-0.913	0.01	-0.105	-0.411	0.306	-0.596	0.091336	-0.687336	0.0274695	-0.859	0.88647	1.26343	-0.0956	1.35903	1.08255	-0.221	1.30355	-4.15234	-2.59524	-1.5571	-0.751	-0.604	-0.147	-0.413	-0.278	-0.135	0.190007	-0.452	0.642007	0.423833	-0.291	0.714833	0.859344	0.342263	0.517081
17.4594	16455.4			16455.4	-1.32862	-0.736	-0.59262	-0.698	-0.572	-0.126	-0.444	-0.675	0.231	0.288206	-0.789	1.07721	-0.792	-0.987	0.195	-0.756	-0.486	-0.27	-0.415	-1.39146	0.97646	0.432203	-0.574	1.0062	0.834453	0.0435814	0.790871	-2.84281	-1.9165	-0.92631	-1.46003	-0.907	-0.55303	-0.771	-0.671	-0.1	0.869575	0.175162	0.694413	-0.0674	-0.869	0.8016	0.344523	0.13238	0.212143
17.4885	16484.5			16484.5	-1.42835	-1.38931	-0.03904	-0.284	-0.313	0.029	-0.827	-1.07315	0.24615	0.29301	-0.879	1.17201	0.230529	-0.0583	0.288829	-0.26	-0.165	-0.095	0.134806	-1.05327	1.18808	0.710115	-0.0432	0.753315	-0.504	-0.575	0.071	-3.84981	-2.59858	-1.25123	-0.941	-0.677	-0.264	-1.03222	-0.923	-0.10922	0.796601	-0.316	1.1126	0.539248	-0.381	0.920248	6.51345e-07	0.2463	-0.246299
17.5195	16515.4			16515.4	-1.35385	-0.875	-0.47885	-0.443	-0.446	0.003	-0.448	-0.633	0.185	0.060164	-0.587	0.647164	-0.881	-0.301	-0.58	-0.224	-0.116	-0.108	0.587425	-0.754	1.34143	0.115952	0.245536	-0.129584	-0.0769	-0.567	0.4901	-2.64864	-2.24657	-0.40207	-0.137	-1.27485	1.13785	-0.27	-0.363	0.093	0.152976	-0.0174	0.170376	-0.54	-1.11664	0.57664	0.58404	0.538105	0.0459354
17.5524	16548.4			16548.4	-1.71456	-2.0979	0.38334	0.0427917	-0.203	0.245792	0.316852	-0.0353	0.352152	0.0730031	-0.505	0.578003	-0.928	-0.616	-0.312	0.27966	-0.013	0.29266	-0.626	-1.60848	0.98248	0.0265835	-0.561	0.587584	0.019505	-0.42	0.439505	-2.87334	-1.987	-0.88634	-0.0343	-1.13182	1.09752	0.61422	-0.593	1.20722	0.1628	-0.426	0.5888	-0.234	-0.514	0.28	0.757455	0.56689	0.190566
17.5874	16583.3			16583.3	-1.4251	-1.27664	-0.14846	-0.645	-0.541	-0.104	0.118295	-0.249	0.367295	-0.22	-0.496	0.276	0.115114	-0.147	0.262114	0.750477	-0.142	0.892477	-0.431	-1.05475	0.62375	0.291462	0.263153	0.0283092	0.420245	-0.0559	0.476145	-2.35607	-1.96735	-0.38872	-0.065	-0.91	0.845	-0.102	-0.0206	-0.0814	0.398311	-0.39	0.788311	-0.265	-1.20387	0.93887	1.35623	-0.118	1.47423
17.6246	16620.5			16620.5	-1.6471	-1.8078	0.1607	-0.711	-0.618	-0.093	0.344749	0.0612985	0.28345	-0.989	-0.912	-0.077	0.271135	-0.175	0.446135	0.936497	-0.188	1.1245	-0.524	-1.56224	1.03824	-0.84	-1.079	0.239	1.31646	0.700445	0.616015	-3.70422	-3.15645	-0.54777	-0.215	-0.512	0.297	-0.163	-0.848	0.685	0.496756	-0.183	0.679756	0.495945	-0.332	0.827945	0.859531	0.0366497	0.822881
17.6641	16660.1			16660.1	-2.03108	-1.98227	-0.04881	-1.00933	-1.07479	0.06546	0.220797	0.0928405	0.127957	-0.0956	-0.205	0.1094	0.48754	-0.265	0.75254	-0.452	-0.427	-0.025	-1.19681	-1.7924	0.59559	1.00688	-0.0419	1.04878	0.0469824	-0.185	0.231982	-3.6966	-2.71801	-0.97859	-1.14093	-1.04851	-0.09242	-0.597	-1.04465	0.44765	-0.638	-0.829	0.191	0.387673	-0.269	0.656673	0.408201	0.176898	0.231303
17.7062	16702.1			16702.1	-1.35126	-1.94009	0.58883	0.213147	-0.113	0.326147	0.60638	-0.17	0.77638	-0.514	-0.295	-0.219	0.389146	-0.256	0.645146	-0.892	-0.444	-0.448	-1.39634	-1.72604	0.3297	-0.0351	0.184508	-0.219608	0.711121	0.0869604	0.624161	-2.79372	-2.15972	-0.634	-0.791	-0.825	0.034	0.0576278	-0.606	0.663628	-0.826	-0.861	0.035	-0.145	-0.634	0.489	0.520658	0.499971	0.020687
17.7508	16746.8			16746.8	-1.49442	-1.84014	0.34572	0.804905	-0.192	0.996905	0.0780418	-0.978	1.05604	0.197107	-0.0759	0.273007	-0.264	-0.229	-0.035	-0.491	-0.386	-0.105	-0.273	-1.56454	1.29154	-0.496	-0.174	-0.322	0.628775	0.205259	0.423516	-3.21416	-2.30269	-0.91147	-1.35357	-1.05616	-0.29741	0.0917348	-0.201	0.292735	-0.015	-0.525	0.51	0.0167157	-0.788	0.804716	-0.316	-0.922	0.606
17.7983	16794.3			16794.3	-0.422	-1.92245	1.50045	-0.419	-0.683	0.264	-0.171	-0.474	0.303	-0.505	-0.795	0.29	-0.386	-1.11565	0.72965	0.030738	-0.228	0.258738	-0.0723	-0.46	0.3877	0.719504	-0.187	0.906504	-0.493	-0.665	0.172	-3.53494	-2.70106	-0.83388	-0.379	-0.466	0.087	0.714421	-0.531	1.24542	0.669584	-0.452	1.12158	1.27091	0.502426	0.768484	1.03905	0.207182	0.831868
17.8488	16844.7			16844.7	-1.4695	-2.05172	0.58222	0.112702	-0.49	0.602702	-0.275	-0.914	0.639	-0.75	-1.3019	0.5519	0.209806	-0.65	0.859806	-0.699	-0.455	-0.244	0.219619	-0.754	0.973619	0.888816	0.287771	0.601045	0.0526211	0.274265	-0.221644	-4.14105	-3.31054	-0.83051	-0.804	-0.807	0.003	0.433645	-0.568	1.00164	0.734616	-0.432	1.16662	-0.335	-0.702	0.367	0.26438	0.211347	0.0530333
17.9025	16898.4			16898.4	-1.1055	-1.27013	0.16463	0.396942	-0.36	0.756942	-0.237	-0.607	0.37	0.109157	-0.855	0.964157	-0.493	-0.599	0.106	0.133883	0.00129199	0.132591	-0.848	-1.67533	0.82733	0.360983	0.360256	0.000727032	-0.643	-0.392	-0.251	-2.79238	-2.61565	-0.17673	0.213791	-0.0747	0.288491	0.160683	0.103237	0.0574459	0.148546	-0.546	0.694546	-0.183	-0.144	-0.039	-0.214	-0.101	-0.113
17.9595	16955.5			16955.5	-1.18152	-1.5917	0.41018	0.0636552	-0.237	0.300655	-0.359	-0.697	0.338	-0.682	-0.504	-0.178	1.05931	-0.00561	1.06492	0.234215	-0.175	0.409215	-1.06781	-2.02962	0.96181	-0.61	-0.834	0.224	0.778277	0.328876	0.449401	-2.89654	-2.45427	-0.44227	-0.878	-0.268	-0.61	0.311659	-0.296	0.607659	-0.0207	-0.777	0.7563	0.51592	-0.00421	0.52013	0.980012	0.336723	0.643289
18.0202	17016.1			17016.1	-2.73855	-2.10109	-0.63746	0.3392	-0.444	0.7832	-0.543	-0.637	0.094	-0.489	-0.85	0.361	0.422896	-0.322	0.744896	0.0294002	-0.0982	0.1276	0.231006	-0.841	1.07201	-0.714	-0.488	-0.226	0.803548	-0.222	1.02555	-3.3816	-2.65484	-0.72676	-0.785	-0.427	-0.358	0.843961	0.047815	0.796146	0.479623	0.245019	0.234605	0.811211	-0.705	1.51621	0.407416	0.487901	-0.0804851
18.0846	17080.6			17080.6	-3.14018	-2.41038	-0.7298	-1.31138	-0.969	-0.34238	-0.327	-0.389	0.062	-0.0181	-0.759	0.7409	0.0118399	-0.381	0.39284	-0.403	-0.271	-0.132	0.219167	-0.655	0.874167	-0.152	-0.351	0.199	0.231558	0.283303	-0.0517448	-3.27919	-3.21882	-0.06037	-1.14179	-0.463	-0.67879	0.505305	-0.594	1.09931	0.462106	0.110441	0.351666	0.339159	-0.34	0.679159	0.0611332	-0.0737	0.134833
18.1531	17149.1			17149.1	-1.75043	-1.81474	0.06431	-0.769	-0.282	-0.487	0.610642	-0.723	1.33364	-0.477	-0.198	-0.279	-0.724	-0.365	-0.359	0.41224	0.00789153	0.404348	-1.60788	-2.37638	0.7685	0.164405	-0.553	0.717405	-0.417	-0.226	-0.191	-4.98886	-3.68009	-1.30877	-0.65	-0.37	-0.28	0.293042	-0.096	0.389042	-0.682	0.0286181	-0.710618	-0.435	-1.08396	0.64896	-0.506	-0.0421	-0.4639
18.226	17221.9			17221.9	-2.26212	-2.42197	0.15985	-0.175	-0.612	0.437	-0.508	-0.455	-0.053	0.66458	-0.886	1.55058	-0.819	-0.9	0.081	0.506763	0.0924727	0.414291	-0.279	-0.948	0.669	0.818867	0.117864	0.701003	1.38713	0.245992	1.14114	-4.61321	-3.66631	-0.9469	-0.507	-0.622	0.115	0.260105	-0.417	0.677105	-1.07841	-0.368	-0.71041	0.420564	0.00713975	0.413424	-0.0714	-0.468	0.3966
18.3034	17299.4			17299.4	-1.87145	-2.21035	0.3389	-0.302	-0.418	0.116	-0.989	-0.749	-0.24	-0.565	-0.761	0.196	0.164471	-0.834	0.998471	-0.0674	-0.0701	0.0027	-1.2226	-1.52671	0.30411	-0.0918	-0.0736	-0.0182	0.880008	0.423978	0.45603	-4.16713	-3.28704	-0.88009	-1.11762	-0.334	-0.78362	-0.97	-1.06453	0.09453	0.278516	0.092954	0.185562	0.686819	-0.547	1.23382	0.0689344	-0.111	0.179934
18.3857	17381.7			17381.7	-2.46991	-2.29705	-0.17286	-0.246	-0.292	0.046	0.349113	-0.912	1.26111	0.0792127	-0.0198	0.0990127	-0.431	-0.395	-0.036	0.51846	0.0727175	0.445742	-0.685	-1.68153	0.99653	0.40345	-0.106	0.50945	0.138468	-0.072	0.210468	-4.49076	-3.74146	-0.7493	-0.832	-0.674	-0.158	0.399136	-0.376	0.775136	0.144863	-0.0384	0.183263	-0.446	-1.01125	0.56525	-0.247	-0.0773	-0.1697
18.4732	17469.2			17469.2	-2.34978	-2.27435	-0.07543	0.249217	-0.271	0.520217	0.162439	-0.31	0.472439	0.00345485	-0.704	0.707455	-0.679	-0.961	0.282	0.305445	-0.0259	0.331345	-0.123	-1.40427	1.28127	0.589889	0.352084	0.237805	0.711416	0.659889	0.0515267	-4.77154	-3.56847	-1.20307	-0.271	-0.935	0.664	0.697459	-0.287	0.984459	-0.145	-0.439	0.294	0.326394	-0.924	1.25039	0.278425	0.355978	-0.0775528
18.5663	17562.2			17562.2	-3.46225	-3.00593	-0.45632	-1.57416	-0.962	-0.61216	-0.877	-0.651	-0.226	-0.787	-0.849	0.062	-0.0406	-0.616	0.5754	0.376552	0.276358	0.100194	-0.679	-1.1253	0.4463	-0.07	0.0355494	-0.105549	-0.0703	0.167776	-0.238076	-4.03744	-3.44536	-0.59208	-0.992	0.056447	-1.04845	0.476856	-0.25	0.726856	0.642379	0.0328359	0.609543	-0.0194	-0.0469	0.0275	0.127627	0.0123406	0.115286
18.6651	17661.1			17661.1	-3.49109	-3.07019	-0.4209	-0.292	-0.559	0.267	-1.28731	-1.01886	-0.26845	-1.3761	-1.23574	-0.14036	-0.404	-0.412	0.008	-0.418	-0.185	-0.233	0.87057	-1.11952	1.99009	1.42747	1.05645	0.37102	0.446201	1.18015	-0.733949	-5.18308	-3.64669	-1.53639	-0.861	-1.1665	0.3055	-0.292	-0.239	-0.053	-0.0308	-0.14	0.1092	0.887817	-0.422	1.30982	-0.531	-0.611	0.08
18.7703	17766.2			17766.2	-3.80363	-3.30758	-0.49605	-1.08565	-0.607	-0.47865	-0.848	-0.195	-0.653	-0.292	-0.608	0.316	0.159703	-0.241	0.400703	0.845915	0.284969	0.560946	-0.843	-1.74542	0.90242	0.0214126	0.199463	-0.17805	-0.687	-0.395	-0.292	-4.96599	-3.98612	-0.97987	-0.278	0.186871	-0.464871	0.553499	0.297559	0.25594	-0.472	0.025697	-0.497697	-1.10853	-1.15829	0.04976	0.476198	0.29653	0.179668
18.882	17877.9			17877.9	-3.17043	-3.23702	0.06659	-0.257	-0.0958	-0.1612	-0.448	-0.203	-0.245	-0.00977	-0.12	0.11023	-0.43	-0.552	0.122	0.321436	-0.173	0.494436	-0.914	-1.78423	0.87023	0.478925	-0.032	0.510925	1.24096	0.0463634	1.1946	-5.52659	-4.12049	-1.4061	-0.568	-0.318	-0.25	-0.626	-0.905	0.279	0.577313	0.385254	0.192059	0.148864	-0.303	0.451864	0.765345	0.565544	0.199801
19.0008	17996.7			17996.7	-2.8386	-2.87734	0.03874	-0.207	-0.796	0.589	-1.36276	-0.816	-0.54676	-1.1468	-1.0185	-0.1283	-0.381	-0.549	0.168	0.0997022	-0.154	0.253702	-0.598	-1.87444	1.27644	0.815256	0.536554	0.278702	0.478865	0.340998	0.137867	-6.63675	-4.80234	-1.83441	-0.83	-0.202	-0.628	0.0401378	0.0138237	0.0263141	0.455148	0.168902	0.286246	-0.042	-0.514	0.472	0.712702	0.449904	0.262798
19.1271	18123			18123	-2.44072	-3.19946	0.75874	-0.142	-0.237	0.095	0.160744	0.207579	-0.0468357	-0.0868	-0.895	0.8082	0.423398	-0.379	0.802398	-0.618	0.191503	-0.809503	-0.57	-1.57461	1.00461	0.82727	0.466098	0.361172	-0.423	0.0554723	-0.478472	-5.96486	-4.46587	-1.49899	-1.62381	-1.34497	-0.27884	-0.953	-0.57	-0.383	-0.035	-0.0188	-0.0162	0.869172	-0.39	1.25917	0.0376681	0.391772	-0.354104
19.2613	18257.2			18257.2	-2.9816	-3.17961	0.19801	-0.382	-0.372	-0.01	0.0365735	-0.387	0.423573	-0.75	-0.698	-0.052	0.174741	-0.136	0.310741	0.974814	0.428647	0.546167	-1.57839	-2.29364	0.71525	1.45247	1.13421	0.31826	0.398356	0.196581	0.201775	-6.1979	-4.84624	-1.35166	-0.955	-0.456	-0.499	0.0513656	0.523256	-0.47189	0.237024	0.115365	0.121659	-0.92	-1.24639	0.32639	0.881869	0.0904902	0.791379
19.404	18399.9			18399.9	-2.75457	-2.70669	-0.04788	-0.0644	-0.257	0.1926	-0.0176	-0.53	0.5124	-0.89	-0.948	0.058	-0.247	-0.963	0.716	-0.81	-0.474	-0.336	-1.52439	-2.00678	0.48239	-0.447	0.299847	-0.746847	1.07051	0.82657	0.24394	-5.55656	-4.63447	-0.92209	-2.14544	-1.32847	-0.81697	-0.639	-0.369	-0.27	-0.271	-0.188	-0.083	0.598545	-0.0879	0.686445	1.04638	0.291594	0.754786
19.5556	18551.6			18551.6	-3.46405	-3.09865	-0.3654	-1.12735	-0.966	-0.16135	0.139935	-0.454	0.593935	-1.49773	-1.36054	-0.13719	-0.043	-0.589	0.546	-0.874	-0.255	-0.619	-1.93969	-1.97913	0.03944	-0.264	-0.38	0.116	1.27717	0.644155	0.633015	-7.19494	-5.1458	-2.04914	-1.76945	-0.97	-0.79945	0.63484	-0.0139	0.64874	0.565568	1.07655	-0.510982	0.577232	0.184742	0.392489	0.910424	0.450591	0.459832
19.7169	18712.8			18712.8	-3.23918	-2.89836	-0.34082	-1.03374	-0.675	-0.35874	-0.381	-0.238	-0.143	-0.28	-0.587	0.307	-1.24254	-0.582	-0.66054	0.0313874	0.355309	-0.323922	-0.9	-1.82207	0.92207	0.455426	0.00281751	0.452608	0.953721	0.403341	0.550381	-6.72986	-4.84338	-1.88648	-1.24884	-0.527	-0.72184	-1.01487	-0.921	-0.09387	-0.356	0.23391	-0.58991	0.30349	-0.166	0.46949	0.478787	0.586239	-0.107452
19.8883	18884.2			18884.2	-3.98228	-3.89571	-0.08657	0.142322	0.23868	-0.0963578	0.618092	-0.247	0.865092	-0.673	-0.332	-0.341	-0.219	-0.427	0.208	1.48581	0.636077	0.849733	-1.88716	-2.05997	0.17281	0.444089	0.745206	-0.301118	0.263247	0.495124	-0.231877	-7.24989	-5.04147	-2.20842	-0.521	-0.573	0.052	0.664123	-0.333	0.997123	0.298776	-0.116	0.414776	0.0058254	-0.375	0.380825	0.568573	0.350556	0.218017
20.0705	19066.4			19066.4	-3.60194	-3.15628	-0.44566	0.010306	-0.773	0.783306	0.172783	0.0841977	0.0885853	-0.154	-0.587	0.433	0.357392	-0.156	0.513392	-0.38	0.318074	-0.698074	-0.892	-1.9028	1.0108	0.952291	0.925517	0.0267735	-0.463	0.414583	-0.877583	-7.21799	-4.98428	-2.23371	-0.283	-0.218	-0.065	0.233295	0.00246348	0.230831	0.248855	0.203573	0.0452822	-1.07119	-1.16023	0.08904	-0.169	-0.182	0.013
20.2642	19260.1			19260.1	-4.21222	-4.00192	-0.2103	-0.217	-0.0321	-0.1849	-0.439	-0.781	0.342	-1.60186	-1.77984	0.17798	-0.347	-0.606	0.259	-0.052	0.130554	-0.182554	-1.73483	-2.03319	0.29836	0.865374	0.755698	0.109677	0.0758677	0.426551	-0.350684	-7.33153	-5.46052	-1.87101	-1.74505	-1.255	-0.49005	0.143406	0.211022	-0.0676157	0.856039	0.136514	0.719525	0.475933	0.0199115	0.456021	1.3757	0.409912	0.965788
20.4701	19466			19466	-4.52573	-3.57812	-0.94761	-0.434	0.064005	-0.498005	-0.054	-0.773	0.719	-0.417	-0.718	0.301	-1.22084	-0.752	-0.46884	1.14391	0.389383	0.754527	-2.06038	-2.33157	0.27119	0.732717	0.518382	0.214335	1.08161	0.460215	0.621395	-8.62544	-6.00508	-2.62036	-0.884	-0.485	-0.399	0.718383	0.24745	0.470933	0.681991	0.415824	0.266167	-0.263	-0.586	0.323	0.866993	0.171905	0.695088
20.6889	19684.9			19684.9	-5.31601	-5.11882	-0.19719	-0.54	-1.13277	0.59277	0.438181	0.110205	0.327975	-0.82	-0.803	-0.017	-0.175	-0.995	0.82	0.816661	0.609339	0.207321	-1.54307	-1.83227	0.2892	1.22826	1.00724	0.22102	-0.112	0.21255	-0.32455	-8.84476	-5.9865	-2.85826	-0.594	-0.554	-0.04	0.416983	0.654471	-0.237488	-0.265	-0.0431	-0.2219	0.553193	-0.0906	0.643793	0.240264	0.0946534	0.14561
20.9216	19917.5			19917.5	-6.26671	-4.67227	-1.59444	-1.61806	-0.593	-1.02506	0.685084	0.0520095	0.633074	-1.24593	-1.18693	-0.059	-1.11099	-0.877	-0.23399	0.167205	0.40743	-0.240225	-1.81159	-1.91808	0.10649	1.19032	0.909397	0.280923	0.598794	0.717124	-0.11833	-9.95303	-7.51145	-2.44158	-0.729	-0.405	-0.324	0.250953	-0.3	0.550953	0.452218	0.240981	0.211237	-0.00707	-0.775	0.76793	0.759908	0.363342	0.396566
21.1689	20164.9			20164.9	-5.85124	-4.98815	-0.86309	-1.29175	-0.79	-0.50175	0.669127	0.797518	-0.128391	0.17321	-0.911	1.08421	0.842023	0.3432	0.498823	1.15325	0.351613	0.801637	-2.58248	-2.91119	0.32871	1.04099	0.773139	0.267851	-0.36	-0.389	0.029	-10.5255	-7.94385	-2.58169	-0.476	-0.413	-0.063	0.313777	-0.698	1.01178	0.556091	0.241062	0.315029	0.298614	-0.792	1.09061	1.31966	0.438251	0.881409
21.4318	20427.8			20427.8	-6.01085	-4.76142	-1.24943	-1.19582	-0.687	-0.50882	-0.531	-0.325	-0.206	-0.964	-1.33321	0.36921	-1.40553	-0.976	-0.42953	1.52248	0.618401	0.904079	-1.42008	-2.95455	1.53447	1.75684	0.88381	0.87303	1.28356	0.958801	0.324759	-10.2912	-7.24445	-3.04678	-1.96729	-0.442	-1.52529	0.597857	-0.244	0.841857	1.1034	0.829004	0.274396	-0.013	-0.328	0.315	0.622379	0.81099	-0.188611
21.7113	20707.3			20707.3	-6.40424	-5.98022	-0.42402	-2.08039	-1.27092	-0.80947	0.374577	0.151204	0.223373	-1.33972	-1.35916	0.01944	-1.0471	-1.25586	0.20876	0.265798	0.232728	0.0330702	-1.65079	-2.45859	0.8078	0.815075	0.694481	0.120594	0.61946	0.905148	-0.285688	-11.1541	-7.76494	-3.38915	-2.01052	-0.308	-1.70252	-0.156	0.268723	-0.424723	0.0865708	-0.445	0.531571	0.065915	-0.0889	0.154815	0.824525	0.40884	0.415685
22.0084	21004.4			21004.4	-6.20923	-5.56033	-0.6489	-1.23797	-0.656	-0.58197	0.30184	-0.353	0.65484	0.23362	-0.852	1.08562	0.0687648	-0.857	0.925765	-0.476	0.192197	-0.668197	-1.82848	-2.58374	0.75526	0.671842	0.443241	0.228601	0.588231	0.763134	-0.174903	-10.6653	-8.12813	-2.5372	-1.16434	-0.708	-0.45634	-0.688	-0.652	-0.036	0.350003	0.482507	-0.132504	0.632266	-0.358	0.990266	0.076044	0.591307	-0.515263
32.0586	31054.6			31054.6	-13.6279	-13.3662	-0.26161	-3.14716	-3.05102	-0.09614	0.683	0.217537	0.465463	-0.0747	-2.54555	2.47085	1.65389	0.283254	1.37064	2.45732	1.54896	0.90836	-2.54887	-3.64429	1.09542	1.97615	1.32638	0.64977	1.35074	1.39698	-0.04624	-27.2689	-21.0363	-6.23259	-1.80874	-1.45474	-0.354	1.38434	0.304693	1.07965	1.79305	1.29983	0.49322	-0.658	-1.49067	0.83267	2.69517	0.800363	1.89481
32.1088	31104.8			31104.8	-15.1153	-14.2366	-0.87864	-3.2487	-2.75338	-0.49532	0.189636	-0.472	0.661636	-1.10313	-2.56377	1.46064	0.948066	-0.24	1.18807	1.94376	1.11732	0.82644	-3.83629	-4.44383	0.60754	1.54139	1.40262	0.13877	0.413479	0.431996	-0.018517	-28.1851	-21.3148	-6.8703	-2.96993	-1.695	-1.27493	0.799296	-0.449	1.2483	1.62241	0.752892	0.869518	-0.873	-1.30785	0.43485	1.70487	0.855091	0.849779
32.159	31155			31155	-15.6706	-14.7874	-0.88322	-5.00049	-3.97894	-1.02155	-0.724	-0.882	0.158	-1.72383	-3.31438	1.59055	-0.345	-1.06948	0.72448	0.347776	0.416771	-0.0689944	-3.54157	-4.29287	0.7513	0.792008	1.17186	-0.379852	-0.612	0.20158	-0.81358	-29.3702	-22.1004	-7.26982	-4.30295	-2.99618	-1.30677	-0.215	-1.19226	0.97726	0.568603	-0.0195	0.588103	-1.56204	-2.00949	0.44745	0.728729	-0.0121	0.740829
32.2092	31205.2			31205.2	-16.1205	-15.2758	-0.84469	-4.60001	-3.05817	-1.54184	-0.471	-0.766	0.295	-3.24485	-4.73221	1.48736	-0.745	-1.14957	0.40457	1.47817	0.585082	0.893088	-3.77255	-4.48102	0.70847	1.08505	0.683688	0.401362	-1.29245	-0.162	-1.13045	-29.9582	-23.6437	-6.31454	-2.90109	-2.61675	-0.28434	-1.12623	-1.70856	0.58233	0.841498	-0.0763	0.917798	-1.70314	-1.93836	0.23522	1.0995	-0.162	1.2615
32.2594	31255.4			31255.4	-16.6684	-15.4292	-1.23924	-5.32362	-4.29456	-1.02906	-0.26	-0.575	0.315	-2.77466	-3.56524	0.79058	-0.838	-1.71889	0.88089	0.690257	0.307445	0.382812	-3.22771	-4.59356	1.36585	0.794521	0.25379	0.540731	-2.16508	-1.23626	-0.92882	-30.4303	-22.7273	-7.70306	-3.58676	-2.81999	-0.76677	-0.495	-1.19836	0.70336	0.428519	0.0409189	0.3876	-2.10384	-2.48834	0.3845	0.509916	-0.726	1.23592
32.3096	31305.6			31305.6	-15.2893	-16.0325	0.74326	-4.82566	-3.80346	-1.0222	-0.568	-1.87033	1.30233	-3.75324	-5.08603	1.33279	-1.51575	-1.81597	0.30022	0.622538	0.0888415	0.533696	-4.04378	-4.58998	0.5462	-0.7	-0.306	-0.394	-1.82847	-0.884	-0.94447	-29.7562	-23.125	-6.63122	-4.42458	-3.64729	-0.77729	-2.0284	-2.48485	0.45645	0.10078	-0.525	0.62578	-2.4977	-2.85615	0.35845	0.798633	-0.91	1.70863
32.3598	31355.8			31355.8	-15.9292	-14.9431	-0.98604	-4.79774	-3.85391	-0.94383	-1.1368	-1.56936	0.43256	-3.90708	-4.57137	0.66429	-1.04627	-1.50343	0.45716	0.840816	0.391704	0.449112	-5.52989	-5.76417	0.23428	0.0442779	0.141135	-0.0968571	-1.13389	-1.15248	0.01859	-30.7227	-22.9329	-7.78979	-5.19332	-3.64617	-1.54715	-1.68898	-2.31826	0.62928	0.331754	-0.497	0.828754	-3.13686	-3.44175	0.30489	-0.371	-1.19032	0.81932
32.4101	31406			31406	-17.3674	-15.8549	-1.51258	-4.7249	-4.34799	-0.37691	-0.366	-0.716	0.35	-3.47567	-4.45364	0.97797	-0.989	-0.98	-0.009	1.05659	-0.0806	1.13719	-5.02498	-5.92731	0.90233	0.727509	0.351036	0.376473	-2.01924	-1.0488	-0.97044	-30.9056	-23.2561	-7.6495	-4.91115	-3.35465	-1.5565	-1.0937	-1.87543	0.78173	0.371561	-1.1579	1.52946	-2.83763	-3.13051	0.29288	0.614288	-0.568	1.18229
32.4603	31456.2			31456.2	-16.7586	-16.1861	-0.57251	-4.73627	-4.00721	-0.72906	-0.298	-0.594	0.296	-4.28229	-5.23173	0.94944	-0.744	-1.68575	0.94175	-0.625	-0.257	-0.368	-4.90088	-5.50989	0.60901	-1.6387	-0.992	-0.6467	-2.12369	-0.682	-1.44169	-30.8202	-22.9634	-7.8568	-4.36581	-3.13743	-1.22838	-0.721	-1.95607	1.23507	0.46866	-0.648	1.11666	-2.59822	-3.27454	0.67632	-0.441	-1.53887	1.09787
32.5105	31506.4			31506.4	-17.0053	-16.3627	-0.64259	-6.22556	-5.24039	-0.98517	-1.39483	-1.19535	-0.19948	-3.99679	-4.88501	0.88822	-1.03199	-1.94445	0.91246	0.236877	-0.237	0.473877	-4.21054	-5.36351	1.15297	-0.48	-0.222	-0.258	-2.0295	-1.75432	-0.27518	-31.2427	-23.1551	-8.08764	-5.44608	-3.36769	-2.07839	-1.83122	-2.02311	0.19189	-0.463	-1.43746	0.97446	-3.0885	-3.55682	0.46832	-0.131	-1.15625	1.02525
32.5607	31556.6			31556.6	-16.7365	-15.4898	-1.24667	-4.57935	-4.54371	-0.03564	-1.96611	-1.8416	-0.12451	-3.15741	-4.7968	1.63939	-0.778	-1.31708	0.53908	0.244062	-0.211	0.455062	-5.92755	-6.20736	0.27981	-1.065	-1.20305	0.13805	-1.97495	-1.96811	-0.00684	-32.1563	-23.9403	-8.21597	-5.72939	-4.60723	-1.12216	-0.737	-1.94505	1.20805	0.277776	-0.692	0.969776	-2.80949	-3.61671	0.80722	-0.0269	-1.36585	1.33895
32.6109	31606.8			31606.8	-16.4316	-16.0939	-0.33774	-5.06815	-4.6975	-0.37065	-1.03993	-1.12272	0.08279	-3.33169	-4.86037	1.52868	-1.27047	-1.62886	0.35839	-0.525	-0.398	-0.127	-5.33408	-6.58459	1.25051	-0.0276	-0.43	0.4024	-2.02943	-1.60746	-0.42197	-31.0785	-23.6561	-7.42243	-5.92781	-4.99574	-0.93207	-1.54569	-1.64182	0.09613	0.491286	-1.45959	1.95088	-2.62743	-3.2884	0.66097	0.110707	-1.0192	1.12991
32.6611	31657			31657	-17.1352	-15.3579	-1.77733	-5.48569	-4.55833	-0.92736	-1.00384	-1.34554	0.3417	-3.96398	-4.28276	0.31878	-1.40494	-1.7879	0.38296	-0.328	-0.408	0.08	-4.60383	-5.66701	1.06318	-0.366	-0.811	0.445	-1.6448	-1.72572	0.08092	-31.4781	-23.1452	-8.3329	-4.63533	-3.82194	-0.81339	-2.19613	-2.41462	0.21849	-0.309	-0.748	0.439	-3.39187	-4.1107	0.71883	-1.37104	-1.89397	0.52293
32.7113	31707.2			31707.2	-17.6706	-16.5245	-1.14604	-6.3805	-5.36232	-1.01818	-1.30041	-1.43424	0.13383	-3.34519	-4.64588	1.30069	-0.846	-2.10469	1.25869	0.215084	-0.275	0.490084	-5.03112	-5.37264	0.34152	-1.26248	-0.767	-0.49548	-2.46369	-1.90711	-0.55658	-31.5961	-23.6315	-7.96464	-5.07175	-3.67922	-1.39253	-2.47493	-2.42198	-0.05295	-0.238	-1.13235	0.89435	-3.9827	-4.16004	0.17734	0.0186143	-0.72	0.738614
32.7615	31757.4			31757.4	-16.3799	-15.9387	-0.44119	-5.87278	-5.00006	-0.87272	-1.50699	-1.54255	0.03556	-2.95522	-4.5451	1.58988	-0.318	-1.09363	0.77563	0.413303	0.056851	0.356452	-4.64925	-5.85196	1.20271	-0.534	-0.275	-0.259	-2.63377	-1.63827	-0.9955	-31.1505	-23.7667	-7.38381	-5.00372	-3.87465	-1.12907	-1.0912	-2.05718	0.96598	-0.629	-1.26277	0.63377	-3.6435	-3.87907	0.23557	0.262744	-0.823	1.08574
32.8117	31807.6			31807.6	-17.2242	-15.9923	-1.23188	-4.88795	-4.20737	-0.68058	-1.04537	-1.28379	0.23842	-3.64332	-4.44011	0.79679	-0.511	-1.3789	0.8679	0.467602	-0.22	0.687602	-5.58296	-5.74198	0.15902	-1.07284	-0.663	-0.40984	-2.70412	-1.77215	-0.93197	-31.255	-23.827	-7.428	-4.80735	-3.70019	-1.10716	-0.512	-1.81486	1.30286	-0.369	-1.26845	0.89945	-3.33495	-3.73757	0.40262	-0.0984	-1.95198	1.85358
32.8619	31857.8			31857.8	-17.109	-16.4458	-0.66325	-6.09406	-4.98347	-1.11059	-1.59439	-1.50234	-0.09205	-3.72356	-5.11796	1.3944	-2.0164	-2.62305	0.60665	0.113743	-0.0725	0.186243	-5.75332	-6.46525	0.71193	0.179231	-0.161	0.340231	-2.25517	-1.371	-0.88417	-31.9519	-23.8054	-8.14656	-4.94339	-3.74251	-1.20088	-1.40551	-2.60946	1.20395	-0.879	-1.40649	0.52749	-2.85472	-3.46079	0.60607	0.205174	-1.43399	1.63916
32.9121	31908			31908	-17.2789	-16.4825	-0.79632	-5.40251	-4.1932	-1.20931	-1.6175	-1.66109	0.04359	-4.01515	-5.36391	1.34876	-1.35228	-2.15014	0.79786	-0.306	0.0381312	-0.344131	-5.65274	-5.81436	0.16162	0.415498	-0.184	0.599498	-2.33802	-1.82312	-0.5149	-32.7136	-24.8713	-7.84229	-5.27241	-4.01418	-1.25823	-1.05168	-1.88201	0.83033	0.493023	-0.686	1.17902	-3.43518	-3.70546	0.27028	0.310191	-0.986	1.29619
32.9623	31958.2			31958.2	-18.4362	-16.9215	-1.51467	-5.12734	-4.48655	-0.64079	-2.00035	-2.05533	0.05498	-3.05363	-4.48939	1.43576	-0.564	-1.34491	0.78091	-0.15	-0.543	0.393	-5.89886	-6.77404	0.87518	0.711661	0.534182	0.177479	-2.62594	-1.72759	-0.89835	-32.9011	-24.8978	-8.0033	-5.21234	-3.71259	-1.49975	-0.713	-1.98245	1.26945	-0.129	-0.129	0	-3.19144	-3.39569	0.20425	-0.884	-2.16216	1.27816
33.0125	32008.4			32008.4	-16.6867	-16.1482	-0.53846	-6.86534	-5.29688	-1.56846	-1.75319	-1.57107	-0.18212	-2.45248	-3.69996	1.24748	-1.69702	-2.55732	0.8603	-0.113	0.101113	-0.214113	-5.45769	-6.17731	0.71962	-1.38415	-1.3298	-0.05435	-2.26889	-1.70078	-0.56811	-31.6842	-24.4441	-7.24003	-5.10103	-4.1658	-0.93523	-1.57578	-2.12459	0.54881	-0.362	-1.40119	1.03919	-2.49889	-3.46656	0.96767	-0.155	-1.47865	1.32365
33.0133	32009.3			32009.3	-82.3162	-16.5595	-65.7568	-71.6382	-5.95203	-65.6862	-64.3472	-1.36566	-62.9815	-67.4945	-5.02675	-62.4678	-64.7374	-1.29086	-63.4465	-66.0911	-0.0752	-66.0159	-67.4781	-6.18596	-61.2922	-61.7269	-1.0497	-60.6772	-63.7482	-1.7596	-61.9886	-95.1903	-25.4097	-69.7806	-64.8328	-4.44064	-60.3921	-62.8129	-3.39813	-59.4147	-60.4725	-1.7156	-58.7569	-62.9438	-3.80927	-59.1345	-59.4525	-1.69191	-57.7606
33.0141	32010			32010	-79.5123	-13.919	-65.5933	-68.0335	-2.26269	-65.7709	-62.8304	0.755565	-63.5859	-64.5465	-2.63435	-61.9121	-62.6702	-0.173	-62.4972	-63.4908	1.11228	-64.6031	-63.7881	-3.63032	-60.1578	-57.3484	2.40585	-59.7543	-60.0898	0.494594	-60.5844	-93.2772	-22.5996	-70.6777	-63.4492	-1.95254	-61.4966	-59.4059	-0.282	-59.1239	-58.8688	0.265813	-59.1346	-59.9915	-1.44249	-58.549	-56.2114	-0.17	-56.0414
33.0149	32010.8			32010.8	-79.6023	-13.5728	-66.0296	-67.618	-2.54263	-65.0753	-62.0455	0.345875	-62.3914	-64.1682	-2.77656	-61.3916	-60.4708	0.844669	-61.3154	-60.9447	1.27087	-62.2155	-62.4081	-3.44196	-58.9661	-56.8075	1.61792	-58.4254	-58.7531	-0.251	-58.5021	-92.0743	-22.0609	-70.0134	-62.0078	-1.55977	-60.448	-57.9762	0.298344	-58.2745	-57.1928	0.791313	-57.9841	-58.9294	-0.951	-57.9784	-53.8652	-0.068	-53.7972
33.0157	32011.7			32011.7	-79.6303	-13.9261	-65.7042	-66.4278	-2.20465	-64.2232	-61.5784	0.0238154	-61.6022	-63.61	-3.08125	-60.5288	-59.719	0.29395	-60.013	-59.8637	1.26424	-61.1279	-60.7055	-4.19323	-56.5123	-54.4243	1.66702	-56.0913	-57.0541	0.0680482	-57.1222	-91.26	-22.3776	-68.8824	-61.0459	-1.58221	-59.4637	-57.4235	-0.668	-56.7555	-54.9899	1.47714	-56.467	-58.1738	-2.16656	-56.0073	-52.0425	0.724099	-52.7666
33.0166	32012.6			32012.6	-78.3555	-13.8707	-64.4848	-65.9659	-2.10075	-63.8652	-60.608	-0.181	-60.427	-61.8891	-2.71282	-59.1763	-57.6149	0.585767	-58.2007	-57.5774	1.11488	-58.6923	-59.7154	-4.45826	-55.2571	-53.516	1.17499	-54.691	-54.5493	-0.0204	-54.5289	-91.1985	-22.3347	-68.8638	-60.1889	-1.47035	-58.7185	-57.5344	-0.872	-56.6624	-53.4078	0.840323	-54.2481	-56.589	-2.55348	-54.0355	-52.053	0.405494	-52.4585
33.0176	32013.5			32013.5	-77.1154	-13.9391	-63.1763	-65.3062	-2.06883	-63.2374	-58.6898	0.812506	-59.5024	-59.8158	-2.61897	-57.1968	-56.5665	0.172005	-56.7385	-55.9804	1.49192	-57.4723	-57.47	-3.66619	-53.8038	-49.7894	2.15595	-51.9454	-52.1228	0.0604107	-52.1832	-89.8095	-22.0722	-67.7373	-59.9187	-1.44257	-58.4761	-54.948	-0.0153	-54.9327	-52.6545	0.931244	-53.5857	-54.8013	-2.26158	-52.5397	-49.362	-0.197	-49.165
33.0186	32014.5			32014.5	-77.1238	-14.031	-63.0928	-64.4216	-2.82087	-61.6008	-57.0299	0.683081	-57.713	-58.7112	-2.63331	-56.0779	-55.7092	-0.339	-55.3702	-54.7522	1.14476	-55.8969	-55.5735	-4.23786	-51.3357	-48.0935	1.7946	-49.8881	-51.0304	-0.579	-50.4514	-88.0057	-21.7289	-66.2768	-58.5925	-1.87156	-56.7209	-53.9776	0.470314	-54.4479	-51.1007	0.0859475	-51.1866	-52.4238	-1.72271	-50.7011	-48.578	-0.264	-48.314
33.0196	32015.6			32015.6	-76.7935	-14.0829	-62.7107	-62.7658	-2.21602	-60.5498	-56.0814	0.915952	-56.9974	-57.5277	-2.78801	-54.7397	-53.3172	-0.145	-53.1722	-52.3306	1.45307	-53.7836	-55.0016	-4.87429	-50.1273	-47.0972	1.71669	-48.8139	-47.3364	0.389106	-47.7256	-88.7481	-22.2713	-66.4768	-56.9769	-1.53104	-55.4459	-53.165	-0.0169	-53.1481	-50.4639	0.480695	-50.9446	-51.2722	-2.13365	-49.1385	-45.7542	0.256414	-46.0106
33.0208	32016.7			32016.7	-76.4433	-14.8099	-61.6334	-62.1046	-2.5497	-59.5549	-55.4057	0.629863	-56.0355	-56.4069	-3.31511	-53.0918	-51.4316	-0.358	-51.0736	-50.4326	1.10852	-51.5412	-51.492	-4.09942	-47.3926	-44.5999	1.3833	-45.9832	-45.3333	0.0963999	-45.4297	-87.2873	-21.2177	-66.0695	-57.2797	-1.865	-55.4147	-51.3133	-0.327	-50.9863	-47.8885	1.81858	-49.7071	-48.9392	-0.914	-48.0252	-44.3028	0.0512139	-44.3541
33.022	32017.9			32017.9	-74.6264	-14.289	-60.3374	-61.7492	-2.50307	-59.2461	-54.1177	0.696793	-54.8145	-53.4982	-2.77183	-50.7264	-48.707	0.981658	-49.6886	-47.5362	1.74967	-49.2859	-48.7556	-3.34259	-45.413	-42.8075	1.75521	-44.5628	-44.9873	-0.314	-44.6733	-86.7196	-22.3409	-64.3787	-55.3531	-1.33915	-54.0139	-50.1987	0.424255	-50.6229	-46.7123	1.22375	-47.9361	-48.0253	-2.10501	-45.9203	-42.2293	0.128689	-42.358
33.0233	32019.2			32019.2	-74.325	-13.8125	-60.5125	-60.0371	-1.98489	-58.0522	-52.3238	0.334713	-52.6585	-52.2575	-2.40864	-49.8488	-47.9252	-0.141	-47.7842	-45.483	1.38294	-46.866	-46.7043	-3.20644	-43.4979	-40.5435	2.09638	-42.6399	-41.4522	0.644195	-42.0964	-85.1566	-21.6062	-63.5504	-53.95	-0.599	-53.351	-47.9344	0.657475	-48.5919	-44.0032	1.47603	-45.4792	-44.5581	-0.82	-43.7381	-40.9425	0.0808727	-41.0233
33.0247	32020.6			32020.6	-72.7526	-13.6769	-59.0757	-59.3941	-2.32408	-57.07	-52.0348	0.327126	-52.3619	-50.8188	-1.9425	-48.8763	-46.9245	0.370566	-47.295	-44.4248	1.07967	-45.5044	-44.9578	-3.30354	-41.6543	-37.4806	2.22783	-39.7084	-39.6366	0.507732	-40.1443	-84.78	-21.6567	-63.1233	-52.9107	-1.16108	-51.7496	-46.1463	0.592087	-46.7383	-44.4813	0.870885	-45.3522	-42.8931	-0.919	-41.9741	-38.6164	-0.158	-38.4584
33.0261	32022.1			32022.1	-72.2266	-14.2372	-57.9894	-57.3854	-1.95204	-55.4334	-50.6721	0.119157	-50.7913	-49.4857	-3.40698	-46.0787	-44.2709	0.393241	-44.6642	-42.2935	1.33723	-43.6307	-44.4506	-3.68774	-40.7629	-37.392	1.47224	-38.8643	-38.4806	-0.585	-37.8956	-83.9724	-21.8766	-62.0958	-52.5387	-1.36368	-51.1751	-45.4714	0.840129	-46.3115	-41.2991	0.892556	-42.1916	-41.4471	-0.871	-40.5761	-35.2867	1.06417	-36.3508
33.0277	32023.6			32023.6	-70.7635	-13.4987	-57.2648	-56.2203	-2.15477	-54.0655	-48.8667	0.617261	-49.484	-47.5309	-2.55887	-44.972	-43.3334	-0.24	-43.0934	-40.271	1.35175	-41.6227	-41.1608	-3.68712	-37.4737	-34.6804	1.71461	-36.395	-35.2987	0.719648	-36.0183	-83.0858	-21.6638	-61.422	-51.0177	-1.1426	-49.8751	-43.5007	0.789745	-44.2904	-41.7726	0.731089	-42.5037	-40.034	-1.3246	-38.7094	-34.2418	0.632004	-34.8738
33.0293	32025.3			32025.3	-69.1249	-13.5157	-55.6092	-54.3522	-1.40386	-52.9484	-45.9651	1.25313	-47.2183	-45.9708	-2.7877	-43.1831	-40.4489	0.844436	-41.2933	-38.7273	0.914403	-39.6417	-39.1389	-3.29866	-35.8403	-33.0504	2.09323	-35.1436	-34.2492	-0.273	-33.9762	-81.6752	-21.8289	-59.8463	-49.4765	-1.27765	-48.1988	-43.8213	-0.505	-43.3163	-39.5976	1.04386	-40.6414	-38.1403	-2.11246	-36.0278	-32.0935	0.442277	-32.5357
33.0311	32027			32027	-68.2338	-13.0319	-55.202	-54.8382	-2.7066	-52.1316	-45.1953	0.473626	-45.6689	-43.9794	-1.99423	-41.9852	-38.6313	0.512054	-39.1433	-36.1627	1.38164	-37.5444	-37.3709	-3.81413	-33.5568	-30.4246	1.73377	-32.1583	-32.194	-0.00887	-32.1852	-81.2346	-22.5119	-58.7228	-48.4783	-1.08493	-47.3934	-40.942	0.348167	-41.2902	-37.9143	0.83569	-38.75	-36.906	-1.31994	-35.5861	-30.3959	0.166125	-30.5621
33.0329	32028.9			32028.9	-67.4795	-13.425	-54.0545	-53.3992	-2.09979	-51.2994	-43.8092	0.972097	-44.7813	-43.0614	-3.29614	-39.7653	-36.8837	0.446442	-37.3301	-33.787	1.00767	-34.7946	-36.0047	-3.24345	-32.7612	-30.7559	1.04258	-31.7985	-31.0875	0.0640908	-31.1516	-79.5962	-21.3643	-58.232	-47.5597	-1.91535	-45.6443	-40.6065	-0.214	-40.3925	-35.5223	0.687722	-36.2101	-34.335	-1.26985	-33.0652	-30.3366	-0.447	-29.8896
33.0349	32030.9			32030.9	-66.3396	-13.2928	-53.0468	-51.2331	-1.50417	-49.7289	-41.7743	1.03529	-42.8096	-40.668	-2.62677	-38.0413	-34.6653	0.756305	-35.4216	-33.9486	0.611159	-34.5597	-33.8669	-3.63678	-30.2301	-28.2574	1.56569	-29.8231	-28.5862	0.178991	-28.7652	-79.084	-22.2946	-56.7894	-46.4595	-1.59728	-44.8622	-39.1932	-0.352	-38.8412	-35.1244	1.08103	-36.2054	-32.6873	-1.29815	-31.3891	-27.2835	0.558155	-27.8417
33.037	32033			32033	-64.4879	-13.7532	-50.7346	-50.7823	-2.43147	-48.3508	-40.9459	0.353698	-41.2996	-40.1075	-3.17328	-36.9342	-33.3597	0.577135	-33.9369	-30.6594	1.16003	-31.8194	-33.4861	-4.74483	-28.7413	-25.6641	1.38902	-27.0531	-27.4662	0.280146	-27.7463	-77.3507	-21.9759	-55.3747	-45.6248	-2.01898	-43.6058	-36.7385	-0.672	-36.0665	-33.7369	0.318136	-34.0551	-32.835	-2.67057	-30.1644	-27.0386	-0.259	-26.7796
33.0392	32035.2			32035.2	-63.4447	-13.4608	-49.9839	-49.5574	-2.53018	-47.0272	-38.6639	1.13163	-39.7956	-37.9884	-2.98289	-35.0055	-32.6986	-0.277	-32.4216	-29.0801	1.21247	-30.2925	-31.3058	-3.46695	-27.8388	-24.7013	1.11264	-25.8139	-25.3317	-0.362	-24.9697	-76.653	-21.4185	-55.2345	-42.4822	-1.27357	-41.2086	-34.9841	-0.162	-34.8221	-31.3836	0.75964	-32.1432	-29.533	-1.79991	-27.7331	-23.4911	0.160672	-23.6518
33.0416	32037.6			32037.6	-63.5307	-14.1645	-49.3662	-47.3139	-2.06573	-45.2482	-37.3861	0.51496	-37.9011	-35.0364	-2.80362	-32.2328	-30.0707	-0.33	-29.7407	-28.0721	0.668674	-28.7407	-29.4751	-4.28447	-25.1906	-23.5614	1.43735	-24.9988	-24.3975	-0.123	-24.2745	-75.7318	-22.0228	-53.709	-42.2103	-2.13276	-40.0775	-34.1022	-0.823	-33.2792	-29.9124	0.249553	-30.1619	-28.9353	-2.19	-26.7453	-23.0984	-0.352	-22.7464
33.0442	32040.1			32040.1	-62.669	-14.4484	-48.2207	-46.1514	-1.81758	-44.3338	-36.6748	-0.227	-36.4478	-34.215	-2.57418	-31.6408	-29.5081	-0.323	-29.1851	-24.9583	1.14802	-26.1063	-28.8912	-4.52136	-24.3699	-21.2483	0.644472	-21.8928	-22.7877	0.446465	-23.2341	-73.9878	-22.0126	-51.9752	-40.6062	-1.7936	-38.8126	-33.495	-1.09669	-32.3983	-28.8927	-0.212	-28.6807	-26.4614	-1.87284	-24.5886	-21.3913	-0.654	-20.7373
33.0468	32042.8			32042.8	-59.7968	-13.8159	-45.981	-44.6942	-2.42737	-42.2669	-34.0604	0.137257	-34.1976	-31.873	-3.29104	-28.582	-26.6134	-0.247	-26.3664	-23.6855	0.79083	-24.4763	-26.7191	-4.62954	-22.0895	-19.8167	1.43291	-21.2496	-21.412	-0.341	-21.071	-72.6566	-21.9738	-50.6828	-39.2296	-1.9573	-37.2723	-30.7911	-0.744	-30.0471	-26.5662	0.464974	-27.0312	-24.8417	-1.78329	-23.0585	-19.7521	0.472704	-20.2249
33.0497	32045.6			32045.6	-59.4851	-14.2721	-45.2131	-43.5389	-2.44846	-41.0904	-33.1491	-0.359	-32.7901	-31.1474	-3.43141	-27.716	-25.1891	0.282596	-25.4717	-22.9448	1.00577	-23.9505	-25.5411	-4.37298	-21.1681	-18.7834	0.686231	-19.4697	-19.7688	-0.254	-19.5148	-70.9769	-21.872	-49.1049	-38.7874	-2.18066	-36.6068	-29.1833	-0.761	-28.4223	-25.2534	0.126688	-25.3801	-23.2856	-1.81194	-21.4737	-19.9781	-0.923	-19.0551
33.0527	32048.7			32048.7	-58.1303	-14.3572	-43.7731	-42.3448	-2.618	-39.7268	-31.6468	-0.425	-31.2218	-28.8539	-3.00621	-25.8477	-24.1636	-0.66	-23.5036	-20.8852	1.1302	-22.0154	-23.3024	-4.47522	-18.8272	-18.4387	0.325651	-18.7643	-19.841	-1.06064	-18.7804	-69.509	-21.8938	-47.6152	-36.3853	-2.66119	-33.7242	-27.4024	-0.952	-26.4504	-23.4227	0.563858	-23.9866	-22.0642	-2.09363	-19.9705	-18.8245	-1.29907	-17.5254
33.056	32051.9			32051.9	-56.1853	-14.657	-41.5283	-39.1335	-2.2001	-36.9334	-29.1711	0.215158	-29.3862	-28.2042	-3.62896	-24.5753	-21.8854	-0.0534	-21.832	-19.0916	0.591177	-19.6828	-22.2852	-4.83711	-17.4481	-16.4572	0.348412	-16.8057	-17.1651	-0.252	-16.9131	-68.9461	-22.4706	-46.4755	-34.8613	-2.16494	-32.6963	-25.7403	-0.523	-25.2173	-22.3474	0.0898686	-22.4373	-20.0041	-1.56083	-18.4433	-16.4814	-0.474	-16.0074
33.0594	32055.3			32055.3	-54.0942	-14.3725	-39.7217	-38.5648	-2.92579	-35.639	-27.3202	0.154196	-27.4744	-25.5961	-3.63148	-21.9646	-20.4094	-0.426	-19.9834	-18.5081	0.5416	-19.0497	-21.2405	-4.68757	-16.5529	-15.1186	1.25488	-16.3734	-16.5773	-0.617	-15.9603	-68.082	-22.1375	-45.9446	-34.422	-2.6098	-31.8122	-24.9754	-0.759	-24.2164	-21.682	-0.658	-21.024	-20.0479	-2.61571	-17.4322	-14.7816	-0.695	-14.0866
33.063	32059			32059	-52.4636	-14.1733	-38.2903	-36.2934	-2.29384	-33.9996	-26.4897	-0.902	-25.5877	-24.2471	-3.54531	-20.7017	-19.7211	-0.688	-19.0331	-17.1617	0.26762	-17.4293	-19.9021	-4.60024	-15.3019	-14.7775	0.728265	-15.5058	-15.2708	-0.864	-14.4068	-65.3767	-22.65	-42.7267	-32.1477	-2.27116	-29.8765	-22.82	-0.71	-22.11	-19.265	0.341761	-19.6068	-18.921	-3.02545	-15.8956	-13.7556	-0.915	-12.8406
33.0669	32062.8			32062.8	-51.6832	-14.3101	-37.373	-34.9556	-2.11153	-32.8441	-23.8513	0.297815	-24.1491	-23.6073	-3.86157	-19.7457	-17.4792	-0.464	-17.0152	-14.89	0.794487	-15.6845	-19.2716	-4.72877	-14.5428	-13.4324	0.596817	-14.0293	-14.532	-0.802	-13.73	-64.294	-22.6137	-41.6803	-30.8732	-2.31716	-28.5561	-21.8245	-0.722	-21.1025	-18.6746	-0.567	-18.1076	-16.2505	-2.36388	-13.8866	-13.0076	-0.431	-12.5766
33.071	32067			32067	-50.6313	-15.0462	-35.5851	-33.3019	-3.19484	-30.1071	-22.0603	-0.0447	-22.0156	-21.3038	-3.07706	-18.2268	-15.8445	-0.702	-15.1425	-15.1217	0.160866	-15.2825	-17.9455	-4.69571	-13.2497	-11.7109	0.0999271	-11.8108	-14.3699	-1.30239	-13.0675	-64.3016	-23.3662	-40.9354	-28.9171	-2.39855	-26.5186	-20.1323	-0.649	-19.4833	-17.243	-0.276	-16.967	-16.7888	-3.13078	-13.658	-12.273	-0.922	-11.351
33.0754	32071.3			32071.3	-49.7102	-15.1073	-34.6029	-32.2903	-2.71799	-29.5724	-21.3353	-0.08	-21.2553	-19.7583	-3.64656	-16.1117	-15.2025	-0.541	-14.6615	-13.5225	0.517541	-14.04	-17.5527	-5.15609	-12.3967	-11.7815	0.194187	-11.9757	-13.7462	-0.781	-12.9652	-61.2524	-22.745	-38.5074	-27.6527	-2.1261	-25.5266	-19.8186	-1.65934	-18.1593	-15.9537	-0.573	-15.3807	-14.6598	-2.49003	-12.1698	-10.4998	-0.218	-10.2818
33.0801	32076			32076	-46.9085	-14.3043	-32.6042	-30.7047	-2.3361	-28.3686	-20.2733	-0.79	-19.4833	-18.7477	-3.77793	-14.9698	-13.0841	-0.635	-12.4491	-12.0257	0.131526	-12.1572	-15.6995	-5.14518	-10.5543	-9.50659	0.841017	-10.3476	-12.234	-0.886	-11.348	-59.672	-22.7593	-36.9127	-26.8143	-3.26163	-23.5527	-17.9884	-1.43573	-16.5526	-13.5272	-0.23	-13.2972	-14.4404	-3.31699	-11.1234	-9.83912	-0.782	-9.05712
33.085	32080.9			32080.9	-44.9604	-15.4248	-29.5357	-29.7447	-3.18207	-26.5626	-17.778	-0.149	-17.629	-18.163	-4.75966	-13.4033	-13.0053	-1.09942	-11.9059	-10.9265	0.555064	-11.4815	-15.2062	-5.56941	-9.63675	-9.21589	0.0157878	-9.23168	-12.0273	-1.4449	-10.5824	-57.8326	-22.6396	-35.193	-24.5215	-2.68301	-21.8385	-16.8805	-2.2948	-14.5857	-12.1691	-0.384	-11.7851	-13.4564	-2.67414	-10.7823	-9.6874	-1.02019	-8.66721
33.0903	32086.2			32086.2	-44.1506	-15.4414	-28.7092	-28.4212	-3.92004	-24.5012	-17.6386	-0.957	-16.6816	-17.0309	-4.42897	-12.602	-11.5782	-0.972	-10.6062	-9.38467	0.562177	-9.94685	-14.4297	-5.29026	-9.1394	-8.35344	0.416089	-8.76953	-10.8275	-1.22504	-9.60243	-56.9663	-23.0495	-33.9167	-23.7532	-2.60839	-21.1448	-15.9654	-2.11117	-13.8543	-12.1702	-0.782	-11.3882	-12.4306	-2.8192	-9.61135	-8.49394	-0.438	-8.05594
33.0959	32091.8			32091.8	-42.0695	-15.0562	-27.0133	-25.9404	-3.16437	-22.776	-14.7743	-0.405	-14.3693	-14.21	-3.83878	-10.3712	-11.3958	-0.993	-10.4028	-8.18549	0.620221	-8.80571	-13.1084	-5.16756	-7.94089	-7.96322	-0.0767	-7.88652	-9.81149	-1.12187	-8.68962	-55.7961	-23.8519	-31.9442	-22.7683	-2.99509	-19.7732	-14.0448	-1.75498	-12.2898	-10.3383	-0.316	-10.0223	-10.5388	-2.64041	-7.89839	-7.57114	-1.28082	-6.29032
33.1018	32097.7			32097.7	-40.8678	-14.8538	-26.0141	-24.39	-3.11693	-21.273	-13.7874	-0.861	-12.9264	-14.2371	-4.12176	-10.1153	-9.58738	-0.8	-8.78738	-8.52251	0.356709	-8.87922	-12.8466	-5.71312	-7.13346	-6.97961	0.405833	-7.38544	-10.1481	-1.32794	-8.82017	-54.7516	-23.9984	-30.7532	-20.6615	-2.81682	-17.8447	-13.602	-1.97814	-11.6239	-8.70075	-0.26	-8.44075	-9.89338	-2.45663	-7.43675	-6.61103	-1.04669	-5.56434
33.1081	32104.1			32104.1	-38.2869	-15.0942	-23.1927	-22.9807	-3.3341	-19.6466	-12.178	-0.0996	-12.0784	-12.8063	-4.27363	-8.5327	-8.72718	-0.991	-7.73618	-6.88147	0.292639	-7.17411	-11.6138	-5.13659	-6.47723	-6.56343	0.290739	-6.85417	-7.70602	-0.482	-7.22402	-52.7074	-23.4792	-29.2283	-19.6876	-2.75162	-16.936	-12.0939	-1.38308	-10.7109	-9.4811	-0.746	-8.7351	-9.06098	-2.63262	-6.42836	-5.77582	-0.933	-4.84282
33.1148	32110.8			32110.8	-37.4542	-15.1826	-22.2716	-21.5029	-3.61405	-17.8889	-10.9242	-0.575	-10.3492	-11.2775	-4.07551	-7.20195	-7.69129	-1.07065	-6.62064	-6.54571	0.349546	-6.89526	-10.9414	-5.12156	-5.81988	-5.46767	0.614585	-6.08226	-6.9708	-0.153	-6.8178	-51.3821	-23.2777	-28.1044	-17.769	-3.0054	-14.7636	-9.77321	-1.18561	-8.5876	-8.23103	-1.18914	-7.04189	-8.40376	-2.79335	-5.61041	-5.76956	-1.78906	-3.9805
33.122	32117.9			32117.9	-35.1679	-15.0398	-20.1281	-21.3486	-3.73873	-17.6098	-10.3344	-1.19151	-9.14287	-11.7148	-4.83741	-6.87736	-6.60009	-0.989	-5.61109	-5.53845	0.469	-6.00745	-9.76805	-4.87297	-4.89508	-5.65395	0.532413	-6.18636	-6.71715	-0.781	-5.93615	-50.5658	-23.6853	-26.8805	-17.0507	-3.90338	-13.1473	-10.224	-1.8442	-8.37976	-6.91083	-0.801	-6.10983	-8.39457	-3.61865	-4.77592	-4.74395	-1.82359	-2.92036
33.1296	32125.5			32125.5	-33.7753	-15.6436	-18.1317	-18.5773	-3.9307	-14.6466	-10.648	-1.59844	-9.04952	-10.483	-5.08746	-5.3955	-6.63721	-1.68047	-4.95674	-5.452	-0.173	-5.279	-10.2846	-5.93023	-4.3544	-4.40654	0.398234	-4.80477	-5.71134	-0.944	-4.76734	-48.8089	-24.1958	-24.6132	-16.002	-3.45828	-12.5437	-8.32679	-1.75521	-6.57158	-5.41829	-0.712	-4.70629	-6.43435	-2.66665	-3.7677	-4.85398	-1.2437	-3.61028
33.1376	32133.6			32133.6	-33.5723	-15.1284	-18.4439	-17.6127	-4.3037	-13.309	-8.40455	-0.718	-7.68655	-8.80197	-4.42348	-4.37849	-5.68221	-1.21636	-4.46585	-4.17147	0.405577	-4.57705	-9.22721	-6.09945	-3.12776	-3.70554	0.246397	-3.95194	-5.17146	-0.875	-4.29646	-46.3061	-23.2344	-23.0717	-15.3327	-4.04204	-11.2906	-7.2778	-1.52772	-5.75008	-5.88066	-1.27774	-4.60292	-6.18193	-3.07982	-3.10211	-3.74596	-1.17242	-2.57354
33.1462	32142.2			32142.2	-31.2178	-15.9774	-15.2404	-16.2535	-4.16621	-12.0873	-7.72066	-1.24005	-6.48061	-8.04435	-4.091	-3.95335	-4.43623	-1.10079	-3.33544	-4.18284	0.219367	-4.40221	-8.15433	-5.06604	-3.08829	-2.866	0.434701	-3.3007	-5.44843	-0.964	-4.48443	-44.3495	-23.4024	-20.9471	-12.7383	-2.99516	-9.7431	-7.66864	-2.2053	-5.46334	-5.211	-1.25529	-3.95571	-6.10115	-2.93459	-3.16656	-2.99949	-1.38143	-1.61806
33.1553	32151.3			32151.3	-30.4924	-15.4336	-15.0588	-14.9949	-3.67784	-11.3171	-6.56006	-0.765	-5.79506	-7.19818	-4.15442	-3.04376	-4.07023	-1.62366	-2.44657	-4.23105	-0.0695	-4.16155	-8.7889	-5.81329	-2.97561	-3.4181	-0.479	-2.9391	-4.41948	-1.31695	-3.10253	-44.0106	-23.9316	-20.079	-12.7687	-3.28137	-9.48733	-6.21822	-2.07888	-4.13934	-3.68994	-0.79	-2.89994	-5.27318	-2.97422	-2.29896	-2.63167	-1.30902	-1.32265
33.165	32161			32161	-28.5374	-16.2193	-12.3181	-14.4961	-4.43692	-10.0592	-5.6679	-1.07774	-4.59016	-7.45137	-4.78818	-2.66319	-4.31608	-2.02426	-2.29182	-2.55534	0.389064	-2.9444	-8.36911	-6.0088	-2.36031	-2.66616	0.454685	-3.12085	-4.56628	-1.44194	-3.12434	-42.0816	-23.5699	-18.5117	-10.9025	-3.56835	-7.33419	-5.56434	-1.98073	-3.58361	-3.11252	-1.54488	-1.56764	-5.18627	-2.77022	-2.41605	-2.27636	-1.16502	-1.11134
33.1753	32171.3			32171.3	-28.1989	-16.8068	-11.3921	-13.2003	-4.58133	-8.61901	-5.12878	-1.36886	-3.75992	-7.1771	-4.96131	-2.21579	-4.01242	-1.93129	-2.08113	-2.66391	0.155156	-2.81907	-7.03974	-5.68422	-1.35552	-2.1677	0.0107163	-2.17842	-3.95212	-1.5997	-2.35242	-42.1923	-24.8091	-17.3832	-10.4776	-3.51437	-6.9632	-5.01537	-1.86601	-3.14936	-2.95453	-0.679	-2.27553	-5.04545	-3.65192	-1.39353	-1.88073	-1.44234	-0.43839
33.1863	32182.2			32182.2	-26.38	-15.9546	-10.4254	-12.456	-4.21543	-8.24054	-4.66873	-0.818	-3.85073	-6.23726	-4.07119	-2.16607	-2.94025	-1.42673	-1.51352	-1.58608	0.406636	-1.99272	-7.3639	-5.98007	-1.38383	-1.15089	0.222548	-1.37344	-3.18598	-1.30014	-1.88584	-41.5517	-24.4686	-17.0832	-9.76101	-3.74146	-6.01955	-4.39791	-1.60902	-2.78889	-2.59043	-1.05796	-1.53247	-5.07874	-3.81372	-1.26502	-1.83932	-1.03484	-0.80448
33.1979	32193.9			32193.9	-25.1881	-16.3911	-8.79695	-11.3289	-4.54433	-6.78455	-3.95254	-1	-2.95254	-4.93918	-4.74619	-0.19299	-2.43353	-0.922	-1.51153	-1.35921	0.0593447	-1.41855	-7.50536	-6.55575	-0.94961	-1.53116	0.0693495	-1.60051	-3.37722	-1.48196	-1.89526	-39.7244	-23.6376	-16.0868	-9.59711	-4.33276	-5.26435	-3.71264	-2.22542	-1.48722	-2.87179	-1.32853	-1.54326	-4.2418	-3.58729	-0.65451	-2.61187	-1.43339	-1.17848
33.2103	32206.3			32206.3	-24.8145	-16.1293	-8.68515	-10.1756	-3.64054	-6.53504	-3.56418	-0.96	-2.60418	-5.03946	-5.01696	-0.0225	-2.1249	-2.10002	-0.02488	-0.349	0.037277	-0.386277	-6.85038	-6.47478	-0.3756	-0.868	-0.21	-0.658	-2.06483	-1.19531	-0.86952	-38.3193	-24.1482	-14.1711	-8.93722	-3.89973	-5.03749	-2.90695	-1.77102	-1.13593	-1.86841	-1.36699	-0.50142	-3.72803	-2.53573	-1.1923	-1.51673	-1.90351	0.38678
33.2235	32219.4			32219.4	-23.0482	-15.8537	-7.19448	-9.24131	-4.34881	-4.8925	-3.27133	-0.708	-2.56333	-5.25679	-4.65079	-0.606	-1.49312	-1.56881	0.07569	-0.611	0.550245	-1.16124	-6.04839	-5.46853	-0.57986	-0.668	-0.0684	-0.5996	-3.83424	-1.77391	-2.06033	-38.2631	-24.7581	-13.505	-8.18432	-4.03881	-4.14551	-3.15318	-2.11697	-1.03621	-2.34597	-1.9261	-0.41987	-3.01961	-3.27835	0.25874	-1.40519	-1.97538	0.57019
33.2375	32233.4			32233.4	-23.078	-16.7403	-6.33769	-8.99368	-4.56487	-4.42881	-3.07014	-1.82092	-1.24922	-4.88384	-4.68116	-0.20268	-1.48973	-1.61227	0.12254	-0.94	-0.199	-0.741	-6.3372	-6.43126	0.09406	-0.647	0.0997219	-0.746722	-2.23792	-1.92594	-0.31198	-37.1117	-24.9822	-12.1294	-7.14625	-3.44897	-3.69728	-3.09065	-1.48517	-1.60548	-1.34826	-1.01481	-0.33345	-2.82792	-3.64546	0.81754	-1.51088	-1.75879	0.24791
33.2523	32248.3			32248.3	-21.0927	-16.2408	-4.85189	-8.6396	-4.65235	-3.98725	-2.11306	-1.69881	-0.41425	-4.85276	-4.94916	0.0964	-1.4796	-1.6973	0.2177	-0.00291	0.0754151	-0.0783251	-6.46484	-6.08416	-0.38068	-0.471	-0.137	-0.334	-2.34508	-1.20241	-1.14267	-36.2805	-24.3551	-11.9254	-7.53316	-4.42949	-3.10367	-2.47211	-2.38536	-0.08675	-2.06829	-2.40807	0.33978	-3.43091	-3.31202	-0.11889	-0.252	-1.33477	1.08277
33.2681	32264.1			32264.1	-22.1711	-17.2094	-4.96174	-6.69776	-3.542	-3.15576	-1.62407	-1.45523	-0.16884	-4.06839	-4.54469	0.4763	-0.839	-1.56836	0.72936	-0.577	-0.000234	-0.576766	-6.20149	-5.68421	-0.51728	0.407208	0.127028	0.280181	-2.48388	-1.45872	-1.02516	-36.2032	-24.5676	-11.6356	-6.06991	-3.32389	-2.74602	-1.99871	-1.65599	-0.34272	-1.55157	-0.729	-0.82257	-2.84259	-3.3289	0.48631	-0.0861	-1.21386	1.12776
33.2849	32280.9			32280.9	-20.8929	-17.1257	-3.76718	-7.2521	-4.30707	-2.94503	-2.93361	-1.50053	-1.43308	-4.00115	-4.39859	0.39744	-1.07305	-1.82563	0.75258	-0.481	-0.492	0.011	-4.55531	-5.33944	0.78413	0.272609	0.0785531	0.194056	-1.15002	-0.886	-0.26402	-35.1567	-24.1119	-11.0448	-6.91491	-4.25717	-2.65774	-2.4308	-2.58392	0.15312	-0.301	-0.678	0.377	-2.4885	-3.16249	0.67399	-0.514	-1.19124	0.67724
33.3028	32298.7			32298.7	-19.8626	-15.9073	-3.9553	-7.0802	-4.81703	-2.26317	-2.98326	-2.29547	-0.68779	-3.55577	-5.08408	1.52831	-1.00768	-1.18443	0.17675	0.204053	-0.0823	0.286353	-5.63699	-6.0807	0.44371	-0.227	-0.386	0.159	-2.96238	-2.22543	-0.73695	-34.3803	-24.1472	-10.2332	-6.00678	-4.06103	-1.94575	-2.22131	-2.30974	0.08843	0.609483	-0.859	1.46848	-3.03928	-3.81257	0.77329	0.0833413	-1.24867	1.33201
33.3218	32317.7			32317.7	-19.5099	-16.3594	-3.15049	-7.06751	-4.38335	-2.68416	-1.35707	-0.911	-0.44607	-3.17088	-4.5989	1.42802	-1.0595	-1.50432	0.44482	-0.78	-0.33	-0.45	-4.45365	-6.18531	1.73166	-0.876	-0.654	-0.222	-1.34465	-0.757	-0.58765	-33.5362	-24.2819	-9.25435	-5.95284	-4.03122	-1.92162	-1.6857	-1.85302	0.16732	-0.16	-1.34777	1.18777	-3.63258	-4.57707	0.94449	-0.345	-1.26982	0.92482
33.342	32337.9			32337.9	-19.8072	-17.1428	-2.66432	-6.21288	-4.4133	-1.79958	-2.33665	-1.61938	-0.71727	-4.13626	-5.92591	1.78965	-1.65109	-1.88995	0.23886	-0.281	-0.449	0.168	-5.26528	-6.12946	0.86418	0.929721	0.310792	0.618929	-1.68974	-1.37459	-0.31515	-34.514	-25.3359	-9.17809	-6.52027	-4.40826	-2.11201	-2.53455	-2.76538	0.23083	0.324488	-0.786	1.11049	-2.85017	-2.88187	0.0317	-0.21	-1.44237	1.23237
33.3634	32359.4			32359.4	-18.5592	-16.2498	-2.30941	-5.42866	-4.0692	-1.35946	-0.915	-1.18262	0.26762	-3.5944	-4.56563	0.97123	-1.53419	-2.0389	0.50471	-0.48	-0.353	-0.127	-4.86967	-5.38139	0.51172	-1.1242	-1.076	-0.0482	-1.20277	-1.59088	0.38811	-33.4604	-24.3392	-9.12114	-4.56417	-4.31478	-0.24939	-1.65563	-2.04418	0.38855	-1.00442	-2.10689	1.10247	-1.74851	-2.80166	1.05315	-0.744	-1.71056	0.96656
33.3862	32382.2			32382.2	-17.5176	-16.1868	-1.33076	-5.75798	-4.94018	-0.8178	-1.28214	-1.73818	0.45604	-4.23217	-5.10777	0.8756	-0.424	-1.62884	1.20484	1.0339	0.106808	0.927092	-4.48994	-5.84084	1.3509	0.652129	-0.604	1.25613	-1.43286	-1.24831	-0.18455	-34.1464	-25.7314	-8.41499	-4.81239	-4.02317	-0.78922	-2.05311	-2.5568	0.50369	-1.00372	-0.889	-0.11472	-1.86975	-3.11308	1.24333	-0.113	-1.47033	1.35733
33.4105	32406.4			32406.4	-17.8693	-16.9945	-0.8748	-6.02002	-4.86555	-1.15447	-1.50719	-1.58604	0.07885	-2.99701	-5.14803	2.15102	-0.362	-1.0459	0.6839	0.626428	0.251418	0.37501	-4.4856	-5.98122	1.49562	0.555271	-0.573	1.12827	-1.32945	-1.25375	-0.0757	-32.5835	-24.2288	-8.35475	-6.36195	-4.74609	-1.61586	-1.58593	-2.64681	1.06088	0.494089	-1.16609	1.66018	-2.31472	-2.80114	0.48642	0.027514	-1.17522	1.20273
33.4362	32432.2			32432.2	-18.8215	-17.1131	-1.7084	-5.66547	-4.83557	-0.8299	-2.16735	-2.07219	-0.09516	-3.37589	-4.71808	1.34219	0.207872	-1.8189	2.02677	0.751356	0.471797	0.279558	-4.72834	-5.93927	1.21093	0.747334	-0.551	1.29833	-1.19128	-1.23148	0.0402	-32.6562	-24.7442	-7.91207	-5.42808	-4.09828	-1.3298	-1.85095	-2.4975	0.64655	-0.407	-1.52336	1.11636	-2.00619	-3.52859	1.5224	0.00337618	-1.20935	1.21273
33.4636	32459.6			32459.6	-16.9964	-16.2434	-0.75306	-4.87951	-4.62846	-0.25105	-0.955	-1.40449	0.44949	-3.41665	-4.87628	1.45963	-1.06211	-1.82996	0.76785	0.0418905	-0.289	0.33089	-5.73367	-6.72428	0.99061	0.773184	-0.00752	0.780704	-1.09681	-0.591	-0.50581	-32.5442	-24.1722	-8.37195	-4.84158	-4.0946	-0.74698	-1.86037	-2.78548	0.92511	1.02009	-0.832	1.85209	-1.95021	-3.12088	1.17067	-0.671	-1.83182	1.16082
33.4928	32488.7			32488.7	-18.3767	-17.1136	-1.26312	-5.80478	-4.60489	-1.19989	-1.25536	-1.53559	0.28023	-3.81406	-5.49998	1.68592	0.359195	-1.34492	1.70412	0.583028	0.456089	0.126939	-4.04612	-5.6178	1.57168	1.41603	-0.0444	1.46043	-1.87206	-1.46666	-0.4054	-34.0407	-25.7897	-8.25108	-4.40741	-4.17834	-0.22907	-2.19338	-3.061	0.86762	0.501979	-0.623	1.12498	-1.99281	-2.91941	0.9266	0.247695	-1.39036	1.63805
33.5237	32519.7			32519.7	-18.0769	-16.7144	-1.36246	-4.78542	-5.05903	0.27361	-0.725	-1.32217	0.59717	-3.72394	-5.33395	1.61001	-0.47	-1.50394	1.03394	1.24703	-0.0254	1.27243	-4.28085	-5.82766	1.54681	0.863458	-0.215	1.07846	-1.86424	-1.35449	-0.50975	-32.6888	-24.7437	-7.94508	-5.02573	-3.87138	-1.15435	-0.75	-2.05491	1.30491	-0.566	-1.64102	1.07502	-2.90663	-3.33699	0.43036	0.338687	-1.5795	1.91819
33.5566	32552.6			32552.6	-18.8206	-17.9293	-0.89132	-5.07035	-4.78763	-0.28272	-1.88496	-1.97486	0.0899	-3.1392	-5.47152	2.33232	-0.0117	-1.64384	1.63214	0.101676	0.280711	-0.179035	-4.60786	-5.21544	0.60758	1.02508	-0.239	1.26408	-1.34336	-1.70322	0.35986	-32.5349	-24.998	-7.53689	-6.29661	-4.44917	-1.84744	-0.392	-1.90947	1.51747	-0.452	-1.34266	0.89066	-2.61768	-3.76174	1.14406	-0.922	-2.0256	1.1036
33.5916	32587.6			32587.6	-17.3276	-16.5129	-0.81464	-5.96282	-4.67804	-1.28478	-1.47758	-1.97989	0.50231	-4.75322	-5.83025	1.07703	-1.8526	-2.20536	0.35276	0.563939	-0.229	0.792939	-4.48868	-5.65982	1.17114	0.15886	-0.712	0.87086	-2.45176	-1.50396	-0.9478	-31.9905	-24.9553	-7.0352	-4.20705	-3.76602	-0.44103	-1.84143	-2.76645	0.92502	-0.23	-1.23115	1.00115	-2.79849	-3.89835	1.09986	-0.868	-1.60571	0.73771
33.6288	32624.7			32624.7	-17.313	-16.7967	-0.51632	-5.01731	-4.55996	-0.45735	-2.15833	-1.76866	-0.38967	-3.2654	-4.68407	1.41867	-1.48846	-2.23355	0.74509	-0.801	-0.551	-0.25	-5.10278	-5.95673	0.85395	1.06984	-0.0947	1.16454	-1.82959	-1.78855	-0.04104	-32.943	-24.7076	-8.23538	-5.04764	-4.16321	-0.88443	-0.646	-1.90524	1.25924	0.852006	-1.28536	2.13737	-2.48458	-3.40133	0.91675	-0.34	-1.70008	1.36008
33.6683	32664.3			32664.3	-18.1338	-17.3585	-0.77528	-4.55373	-4.57026	0.01653	-1.47081	-2.04281	0.572	-3.52923	-4.87674	1.34751	-0.307	-1.08277	0.77577	0.360202	0.0402196	0.319982	-4.84318	-5.81794	0.97476	1.09901	-0.299	1.39801	-1.23731	-0.744	-0.49331	-32.8693	-25.2638	-7.60553	-4.57657	-3.69787	-0.8787	-0.857	-1.74253	0.88553	0.504322	-1.24161	1.74593	-1.79359	-3.07287	1.27928	-0.371	-1.51039	1.13939
33.7104	32706.3			32706.3	-17.5495	-17.0922	-0.45722	-5.24856	-4.68558	-0.56298	-0.698	-1.30612	0.60812	-3.67768	-4.88217	1.20449	-1.10717	-2.29115	1.18398	0.663262	0.23029	0.432972	-5.10154	-5.73796	0.63642	-0.261	-0.812	0.551	-2.41344	-1.571	-0.84244	-33.3312	-25.1775	-8.15371	-5.20705	-4.36289	-0.84416	-0.558	-2.43938	1.88138	0.498027	-1.05234	1.55037	-2.45708	-3.25801	0.80093	-0.283	-1.54739	1.26439
33.755	32751			32751	-17.4891	-16.9941	-0.49502	-6.02142	-4.75084	-1.27058	-1.71693	-1.95491	0.23798	-3.15473	-4.84254	1.68781	-0.773	-2.32815	1.55515	-0.19	-0.155	-0.035	-4.24651	-5.85235	1.60584	0.68513	0.0696538	0.615476	-1.17178	-1.06882	-0.10296	-32.2186	-24.9623	-7.25626	-4.43239	-4.11723	-0.31516	-1.26691	-2.08956	0.82265	0.398503	-1.13305	1.53155	-1.91693	-3.15215	1.23522	-0.521	-1.77393	1.25293
33.8025	32798.5			32798.5	-17.5775	-16.662	-0.91545	-5.18501	-4.63362	-0.55139	-1.68412	-1.75013	0.06601	-3.07304	-4.62328	1.55024	-0.147	-1.5186	1.3716	-0.233	-0.032	-0.201	-3.97647	-5.35356	1.37709	0.998397	-0.321	1.3194	-1.11532	-1.09896	-0.01636	-32.744	-24.7753	-7.96862	-4.29621	-3.94792	-0.34829	-1.94437	-2.60346	0.65909	0.170712	-0.874	1.04471	-2.21656	-3.57606	1.3595	-0.308	-1.8041	1.4961
33.853	32849			32849	-17.2799	-16.6885	-0.59141	-4.69377	-4.19572	-0.49805	-0.269	-1.30182	1.03282	-3.89907	-5.17244	1.27337	0.1855	-1.62275	1.80825	0.961671	0.26281	0.698861	-5.57669	-5.85903	0.28234	0.671122	-0.429	1.10012	-1.94109	-1.05428	-0.88681	-32.958	-24.8737	-8.08431	-5.75991	-4.55209	-1.20782	-1.832	-2.33918	0.50718	-0.936	-1.69451	0.75851	-2.67933	-3.17691	0.49758	0.700651	-0.822	1.52265
33.9067	32902.6			32902.6	-17.5407	-17.2339	-0.30679	-5.02788	-4.11789	-0.90999	-1.9668	-1.75204	-0.21476	-2.68191	-4.41752	1.73561	-0.371	-1.5492	1.1782	0.925351	0.235958	0.689392	-4.82287	-6.05788	1.23501	-0.0308	-0.488	0.4572	-0.912	-0.868	-0.044	-32.6228	-24.5666	-8.05622	-3.97807	-4.00515	0.02708	-0.524	-1.92795	1.40395	0.786151	-0.704	1.49015	-3.46247	-3.66193	0.19946	-0.687	-1.67098	0.98398
33.9637	32959.7			32959.7	-18.2674	-17.6531	-0.61433	-4.8528	-4.6426	-0.2102	-0.934	-0.891	-0.043	-3.54057	-4.82011	1.27954	-1.16025	-1.48286	0.32261	1.34556	0.383788	0.961772	-4.37832	-5.53032	1.152	-0.371	-1.08509	0.71409	-2.71809	-1.78603	-0.93206	-33.2965	-25.4457	-7.85078	-4.42713	-3.91754	-0.50959	-1.69155	-1.47356	-0.21799	0.814854	-0.516	1.33085	-3.36111	-3.90918	0.54807	-0.627	-1.74225	1.11525
34.0244	33020.3			33020.3	-18.5729	-17.5683	-1.00463	-4.75022	-4.24375	-0.50647	-0.0158	-0.857	0.8412	-4.06828	-5.74709	1.67881	0.0716974	-1.45895	1.53065	0.666995	-0.0686	0.735595	-4.74691	-5.54677	0.79986	1.22541	0.0715555	1.15385	-2.55624	-1.62933	-0.92691	-33.2569	-25.3028	-7.95407	-4.74887	-3.71751	-1.03136	-1.65595	-2.05629	0.40034	0.77872	-0.791	1.56972	-3.17099	-3.20315	0.03216	-0.557	-1.83751	1.28051
34.0888	33084.8			33084.8	-18.1304	-17.4939	-0.63649	-5.04738	-4.97136	-0.07602	-0.169	-1.77927	1.61027	-3.9812	-5.15232	1.17112	-0.379	-1.46006	1.08106	0.708723	0.213925	0.494797	-4.20667	-5.27227	1.0656	0.830566	-0.195	1.02557	-0.767	-0.578	-0.189	-32.3102	-25.2129	-7.0973	-4.71671	-4.02324	-0.69347	-1.76252	-2.2436	0.48108	0.662591	-0.46	1.12259	-1.74032	-3.02292	1.2826	-0.294	-1.12232	0.82832
[truncated: 145 more rows]
[truncated: 441 more columns]

## Sheet: trace
P700	Lz							Data nr	1	2	3	4	5	6	7	8	9	10	11	12	13	14	15	16	17	18	19	20	21	22	23	24	25	26	27	28	29	30	31	32	33	34	35	36	37	38	39	40	41
Factor	1							Kill Switch																														x
[truncated: 147 more rows]
[truncated: 122 more columns]

## Sheet: org
[truncated: 5,247 more chars]
